# Supplementary material
Source: ML conference proceedings conference paper supplement (https://proceedings.neurips.cc/paper_files/paper/2022/hash/545a114e655f9d25ba0d56ea9a01fc6e-Abstract.html)
Supplement: Supplementary file 1 [file 545a114e655f9d25ba0d56ea9a01fc6e-Supplemental-Conference.zip]

Archive with 376 entries (263 files):
- revised_supplemental/
- revised_supplemental/revised_appendix.pdf
- revised_supplemental/code/
- revised_supplemental/code/plot_figures_revision.ipynb
- revised_supplemental/code/models/
- revised_supplemental/code/models/__init__.py
- revised_supplemental/code/models/ff_cnn.py
- revised_supplemental/code/models/cnn.py
- revised_supplemental/code/models/__pycache__/
- revised_supplemental/code/models/__pycache__/mlp.cpython-36.pyc
- revised_supplemental/code/models/__pycache__/__init__.cpython-36.pyc
- revised_supplemental/code/models/__pycache__/__init__.cpython-38.pyc
- revised_supplemental/code/models/__pycache__/mlp.cpython-38.pyc
- revised_supplemental/code/models/__pycache__/mlp.cpython-39.pyc
- revised_supplemental/code/models/__pycache__/__init__.cpython-39.pyc
- revised_supplemental/code/models/mlp.py
- revised_supplemental/code/utils/
- revised_supplemental/code/utils/__init__.py
- revised_supplemental/code/utils/data.py
- revised_supplemental/code/utils/functions.py
- revised_supplemental/code/utils/custom.py
- revised_supplemental/code/utils/__pycache__/
- revised_supplemental/code/utils/__pycache__/__init__.cpython-38.pyc
- revised_supplemental/code/utils/__pycache__/data.cpython-38.pyc
- revised_supplemental/code/utils/__pycache__/functions.cpython-38.pyc
- revised_supplemental/code/utils/__pycache__/__init__.cpython-39.pyc
- revised_supplemental/code/utils/__pycache__/data.cpython-39.pyc
- revised_supplemental/code/utils/__pycache__/functions.cpython-39.pyc
- revised_supplemental/code/utils/__pycache__/__init__.cpython-36.pyc
- revised_supplemental/code/utils/__pycache__/data.cpython-36.pyc
- revised_supplemental/code/utils/__pycache__/functions.cpython-36.pyc
- revised_supplemental/code/results/
- revised_supplemental/code/results/fig4b/
- revised_supplemental/code/results/fig4b/2022-05-16_14-22-26_xpvgg6_soft_mholo1_im32/
- revised_supplemental/code/results/fig4b/2022-05-16_14-22-26_xpvgg6_soft_mholo1_im32/log.txt
- revised_supplemental/code/results/fig4b/2022-05-16_14-22-26_xpvgg6_soft_mholo1_im32/hyperparameters.json
- revised_supplemental/code/results/fig4b/2022-05-16_14-22-26_xpvgg6_soft_mholo1_im32/data.pickle
- revised_supplemental/code/results/fig4b/2022-05-16_14-22-26_xpvgg6_soft_mholo1_im32/cos/
- revised_supplemental/code/results/fig4b/2022-05-16_14-22-26_xpvgg6_soft_mholo1_im32/cos/total_infuncof_N.svg
- revised_supplemental/code/results/fig2ac/
- revised_supplemental/code/results/fig2ac/2022-05-13_11-14-46_xp_mlp_toy_init5e-1_N24_mysig4_seed2_beta5e-1/
- revised_supplemental/code/results/fig2ac/2022-05-13_11-14-46_xp_mlp_toy_init5e-1_N24_mysig4_seed2_beta5e-1/hyperparameters.json
- revised_supplemental/code/results/fig2ac/2022-05-13_11-14-46_xp_mlp_toy_init5e-1_N24_mysig4_seed2_beta5e-1/log.txt
- revised_supplemental/code/results/fig2ac/2022-05-13_11-14-46_xp_mlp_toy_init5e-1_N24_mysig4_seed2_beta5e-1/data.pickle
- revised_supplemental/code/results/fig2ac/2022-05-13_11-14-46_xp_mlp_toy_init5e-1_N24_mysig4_seed2_beta5e-1/neural_data.pickle
- revised_supplemental/code/results/fig2ac/2022-05-06_16-46-53_xp_mlp_toy_init5e-1_N24_mysig4_seed2_beta1e-1/
- revised_supplemental/code/results/fig2ac/2022-05-06_16-46-53_xp_mlp_toy_init5e-1_N24_mysig4_seed2_beta1e-1/neural_oscillations_l1.svg
- revised_supplemental/code/results/fig2ac/2022-05-06_16-46-53_xp_mlp_toy_init5e-1_N24_mysig4_seed2_beta1e-1/hyperparameters.json
- revised_supplemental/code/results/fig2ac/2022-05-06_16-46-53_xp_mlp_toy_init5e-1_N24_mysig4_seed2_beta1e-1/log.txt
- revised_supplemental/code/results/fig2ac/2022-05-06_16-46-53_xp_mlp_toy_init5e-1_N24_mysig4_seed2_beta1e-1/data.pickle
- revised_supplemental/code/results/fig2ac/2022-05-06_16-46-53_xp_mlp_toy_init5e-1_N24_mysig4_seed2_beta1e-1/neural_data.pickle
- revised_supplemental/code/results/fig2ac/2022-05-06_16-46-53_xp_mlp_toy_init5e-1_N24_mysig4_seed2_beta1e-1/complex_neurons_l1.svg
- revised_supplemental/code/results/fig2ac/2022-05-06_16-44-31_xp_mlp_toy_init5e-1_N24_mysig4_seed2_beta1e-2/
- revised_supplemental/code/results/fig2ac/2022-05-06_16-44-31_xp_mlp_toy_init5e-1_N24_mysig4_seed2_beta1e-2/hyperparameters.json
- revised_supplemental/code/results/fig2ac/2022-05-06_16-44-31_xp_mlp_toy_init5e-1_N24_mysig4_seed2_beta1e-2/log.txt
- revised_supplemental/code/results/fig2ac/2022-05-06_16-44-31_xp_mlp_toy_init5e-1_N24_mysig4_seed2_beta1e-2/data.pickle
- revised_supplemental/code/results/fig2ac/2022-05-06_16-44-31_xp_mlp_toy_init5e-1_N24_mysig4_seed2_beta1e-2/neural_data.pickle
- revised_supplemental/code/results/fig2ac/2022-05-06_16-38-39_xp_mlp_toy_init5e-1_N24_mysig4_seed2_beta1e-3/
- revised_supplemental/code/results/fig2ac/2022-05-06_16-38-39_xp_mlp_toy_init5e-1_N24_mysig4_seed2_beta1e-3/log.txt
- revised_supplemental/code/results/fig2ac/2022-05-06_16-38-39_xp_mlp_toy_init5e-1_N24_mysig4_seed2_beta1e-3/neural_data.pickle
- revised_supplemental/code/results/fig2ac/2022-05-06_16-38-39_xp_mlp_toy_init5e-1_N24_mysig4_seed2_beta1e-3/hyperparameters.json
- revised_supplemental/code/results/fig2ac/2022-05-06_16-38-39_xp_mlp_toy_init5e-1_N24_mysig4_seed2_beta1e-3/data.pickle
- revised_supplemental/code/results/fig2b/
- revised_supplemental/code/results/fig2b/2022-05-24_15-44-08_xp_mlp_toy/
- revised_supplemental/code/results/fig2b/2022-05-24_15-44-08_xp_mlp_toy/hyperparameters.json
- revised_supplemental/code/results/fig2b/2022-05-24_15-44-08_xp_mlp_toy/log.txt
- revised_supplemental/code/results/fig2b/2022-05-24_15-44-08_xp_mlp_toy/neural_data.pickle
- revised_supplemental/code/results/fig2b/2022-05-24_15-44-08_xp_mlp_toy/data.pickle
- revised_supplemental/code/results/fig2b/2022-05-24_15-44-08_xp_mlp_toy/dynamics_stability.png
- revised_supplemental/code/results/fig2d/
- revised_supplemental/code/results/fig2d/2022-05-13_20-37-26_xp_mlp_toy_all05_msig4_seed2/
- revised_supplemental/code/results/fig2d/2022-05-13_20-37-26_xp_mlp_toy_all05_msig4_seed2/hyperparameters.json
- revised_supplemental/code/results/fig2d/2022-05-13_20-37-26_xp_mlp_toy_all05_msig4_seed2/data.pickle
- revised_supplemental/code/results/fig3ab/
- revised_supplemental/code/results/fig3ab/2022-05-17_23-36-23_xp_mlp_2h_mnist_N10_T20_beta5e-2_noise0/
- revised_supplemental/code/results/fig3ab/2022-05-17_23-36-23_xp_mlp_2h_mnist_N10_T20_beta5e-2_noise0/hyperparameters.json
- revised_supplemental/code/results/fig3ab/2022-05-17_23-36-23_xp_mlp_2h_mnist_N10_T20_beta5e-2_noise0/log.txt
- revised_supplemental/code/results/fig3ab/2022-05-17_23-36-23_xp_mlp_2h_mnist_N10_T20_beta5e-2_noise0/data.pickle
- revised_supplemental/code/results/fig3ab/2022-05-17_23-40-58_xp_mlp_2h_mnist_N10_T30_beta5e-2_noise0/
- revised_supplemental/code/results/fig3ab/2022-05-17_23-40-58_xp_mlp_2h_mnist_N10_T30_beta5e-2_noise0/data.pickle
- revised_supplemental/code/results/fig3ab/2022-05-17_23-40-58_xp_mlp_2h_mnist_N10_T30_beta5e-2_noise0/hyperparameters.json
- revised_supplemental/code/results/fig3ab/2022-05-17_23-40-58_xp_mlp_2h_mnist_N10_T30_beta5e-2_noise0/log.txt
- revised_supplemental/code/results/fig3ab/2022-05-17_23-35-58_xp_mlp_2h_mnist_N10_T5_beta5e-2_noise0/
- revised_supplemental/code/results/fig3ab/2022-05-17_23-35-58_xp_mlp_2h_mnist_N10_T5_beta5e-2_noise0/hyperparameters.json
- revised_supplemental/code/results/fig3ab/2022-05-17_23-35-58_xp_mlp_2h_mnist_N10_T5_beta5e-2_noise0/log.txt
- revised_supplemental/code/results/fig3ab/2022-05-17_23-35-58_xp_mlp_2h_mnist_N10_T5_beta5e-2_noise0/data.pickle
- revised_supplemental/code/results/fig3ab/2022-05-17_23-41-46_xp_mlp_2h_mnist_N10_T40_beta5e-2_noise0/
- revised_supplemental/code/results/fig3ab/2022-05-17_23-41-46_xp_mlp_2h_mnist_N10_T40_beta5e-2_noise0/hyperparameters.json
- revised_supplemental/code/results/fig3ab/2022-05-17_23-41-46_xp_mlp_2h_mnist_N10_T40_beta5e-2_noise0/log.txt
- revised_supplemental/code/results/fig3ab/2022-05-17_23-41-46_xp_mlp_2h_mnist_N10_T40_beta5e-2_noise0/data.pickle
- revised_supplemental/code/results/fig3ab/2022-05-17_23-28-25_xp_mlp_2h_mnist_N10_T10_beta5e-2_noise0/
- revised_supplemental/code/results/fig3ab/2022-05-17_23-28-25_xp_mlp_2h_mnist_N10_T10_beta5e-2_noise0/hyperparameters.json
- revised_supplemental/code/results/fig3ab/2022-05-17_23-28-25_xp_mlp_2h_mnist_N10_T10_beta5e-2_noise0/data.pickle
- revised_supplemental/code/results/fig3ab/2022-05-17_23-28-25_xp_mlp_2h_mnist_N10_T10_beta5e-2_noise0/log.txt
- revised_supplemental/code/results/fig3c/
- revised_supplemental/code/results/fig3c/2022-05-15_11-55-35_xp_mlp_2h256_mnist_msig4_winit5e-2/
- revised_supplemental/code/results/fig3c/2022-05-15_11-55-35_xp_mlp_2h256_mnist_msig4_winit5e-2/cos_sim.svg
- revised_supplemental/code/results/fig3c/2022-05-15_11-55-35_xp_mlp_2h256_mnist_msig4_winit5e-2/hyperparameters.json
- revised_supplemental/code/results/fig3c/2022-05-15_11-55-35_xp_mlp_2h256_mnist_msig4_winit5e-2/cos_sim.jpg
- revised_supplemental/code/results/fig3c/2022-05-15_11-55-35_xp_mlp_2h256_mnist_msig4_winit5e-2/data.pickle
- revised_supplemental/code/results/fig3c/2022-05-15_11-55-35_xp_mlp_2h256_mnist_msig4_winit5e-2/cos_sim_noisy.jpg
- revised_supplemental/code/results/fig3c/2022-07-31_16-00-17_xp_mlp_2h256_mnist_msig4_winit5e-2/
- revised_supplemental/code/results/fig3c/2022-07-31_16-00-17_xp_mlp_2h256_mnist_msig4_winit5e-2/hyperparameters.json
- revised_supplemental/code/results/fig3c/2022-07-31_16-00-17_xp_mlp_2h256_mnist_msig4_winit5e-2/data.pickle
- revised_supplemental/code/results/fig4a/
- revised_supplemental/code/results/fig4a/2022-05-11_16-23-48_xpvgg6_soft_mholo1_im32/
- revised_supplemental/code/results/fig4a/2022-05-11_16-23-48_xpvgg6_soft_mholo1_im32/data.pickle
- revised_supplemental/code/results/fig4a/2022-05-11_16-23-48_xpvgg6_soft_mholo1_im32/log.txt
- revised_supplemental/code/results/fig4a/2022-05-11_16-23-48_xpvgg6_soft_mholo1_im32/hyperparameters.json
- revised_supplemental/code/results/fig4a/2022-05-11_15-49-34_xpvgg6_max_mhtanh_im32/
- revised_supplemental/code/results/fig4a/2022-05-11_15-49-34_xpvgg6_max_mhtanh_im32/data.pickle
- revised_supplemental/code/results/fig4a/2022-05-11_15-49-34_xpvgg6_max_mhtanh_im32/hyperparameters.json
- revised_supplemental/code/results/fig4a/2022-05-11_15-49-34_xpvgg6_max_mhtanh_im32/log.txt
- revised_supplemental/code/results/fig4c/
- revised_supplemental/code/results/fig4c/holo_N2/
- revised_supplemental/code/results/fig4c/holo_N2/1/
- revised_supplemental/code/results/fig4c/holo_N2/1/hyperparameters.json
- revised_supplemental/code/results/fig4c/holo_N2/1/log.txt
- revised_supplemental/code/results/fig4c/holo_N2/1/data.pickle
- revised_supplemental/code/results/fig4c/holo_N2/3/
- revised_supplemental/code/results/fig4c/holo_N2/3/hyperparameters.json
- revised_supplemental/code/results/fig4c/holo_N2/3/log.txt
- revised_supplemental/code/results/fig4c/holo_N2/3/data.pickle
- revised_supplemental/code/results/fig4c/holo_N2/2/
- revised_supplemental/code/results/fig4c/holo_N2/2/log.txt
- revised_supplemental/code/results/fig4c/holo_N2/2/hyperparameters.json
- revised_supplemental/code/results/fig4c/holo_N2/2/data.pickle
- revised_supplemental/code/results/fig4c/non_holo_N2/
- revised_supplemental/code/results/fig4c/non_holo_N2/2/
- revised_supplemental/code/results/fig4c/non_holo_N2/2/hyperparameters.json
- revised_supplemental/code/results/fig4c/non_holo_N2/2/log.txt
- revised_supplemental/code/results/fig4c/non_holo_N2/2/data.pickle
- revised_supplemental/code/results/fig4c/non_holo_N2/1/
- revised_supplemental/code/results/fig4c/non_holo_N2/1/hyperparameters.json
- revised_supplemental/code/results/fig4c/non_holo_N2/1/log.txt
- revised_supplemental/code/results/fig4c/non_holo_N2/1/data.pickle
- revised_supplemental/code/results/fig4c/non_holo_N2/3/
- revised_supplemental/code/results/fig4c/non_holo_N2/3/hyperparameters.json
- revised_supplemental/code/results/fig4c/non_holo_N2/3/log.txt
- revised_supplemental/code/results/fig4c/non_holo_N2/3/data.pickle
- revised_supplemental/code/results/fig4c/holo_N4/
- revised_supplemental/code/results/fig4c/holo_N4/1/
- revised_supplemental/code/results/fig4c/holo_N4/1/log.txt
- revised_supplemental/code/results/fig4c/holo_N4/1/data.pickle
- revised_supplemental/code/results/fig4c/holo_N4/1/hyperparameters.json
- revised_supplemental/code/results/fig4c/holo_N4/1/tr_acc.jpg
- revised_supplemental/code/results/fig4c/holo_N4/1/tr_acc.svg
- revised_supplemental/code/results/fig4c/holo_N4/2/
- revised_supplemental/code/results/fig4c/holo_N4/2/hyperparameters.json
- revised_supplemental/code/results/fig4c/holo_N4/2/log.txt
- revised_supplemental/code/results/fig4c/holo_N4/2/data.pickle
- revised_supplemental/code/results/fig4c/holo_N4/3/
- revised_supplemental/code/results/fig4c/holo_N4/3/hyperparameters.json
- revised_supplemental/code/results/fig4c/holo_N4/3/log.txt
- revised_supplemental/code/results/fig4c/holo_N4/3/data.pickle
- revised_supplemental/code/results/table2/
- revised_supplemental/code/results/table2/bp_cif10/
- revised_supplemental/code/results/table2/bp_cif10/2022-05-09_15-08-55_xvgg4_bp_cif10_soft_relu_run1/
- revised_supplemental/code/results/table2/bp_cif10/2022-05-09_15-08-55_xvgg4_bp_cif10_soft_relu_run1/log.txt
- revised_supplemental/code/results/table2/bp_cif10/2022-05-09_15-08-55_xvgg4_bp_cif10_soft_relu_run1/hyperparameters.json
- revised_supplemental/code/results/table2/bp_cif10/2022-05-09_15-08-55_xvgg4_bp_cif10_soft_relu_run1/data.pickle
- revised_supplemental/code/results/table2/bp_cif10/2022-05-09_15-23-10_xvgg4_bp_cif10_soft_relu_run2/
- revised_supplemental/code/results/table2/bp_cif10/2022-05-09_15-23-10_xvgg4_bp_cif10_soft_relu_run2/hyperparameters.json
- revised_supplemental/code/results/table2/bp_cif10/2022-05-09_15-23-10_xvgg4_bp_cif10_soft_relu_run2/log.txt
- revised_supplemental/code/results/table2/bp_cif10/2022-05-09_15-23-10_xvgg4_bp_cif10_soft_relu_run2/data.pickle
- revised_supplemental/code/results/table2/bp_cif10/2022-05-09_15-36-50_xvgg4_bp_cif10_soft_relu_run3/
- revised_supplemental/code/results/table2/bp_cif10/2022-05-09_15-36-50_xvgg4_bp_cif10_soft_relu_run3/log.txt
- revised_supplemental/code/results/table2/bp_cif10/2022-05-09_15-36-50_xvgg4_bp_cif10_soft_relu_run3/data.pickle
- revised_supplemental/code/results/table2/bp_cif10/2022-05-09_15-36-50_xvgg4_bp_cif10_soft_relu_run3/hyperparameters.json
- revised_supplemental/code/results/table2/bp_im32/
- revised_supplemental/code/results/table2/bp_im32/2022-05-07_12-12-30_xpvgg4_bp_im32_soft_relu/
- revised_supplemental/code/results/table2/bp_im32/2022-05-07_12-12-30_xpvgg4_bp_im32_soft_relu/hyperparameters.json
- revised_supplemental/code/results/table2/bp_im32/2022-05-07_12-12-30_xpvgg4_bp_im32_soft_relu/log.txt
- revised_supplemental/code/results/table2/bp_im32/2022-05-07_12-12-30_xpvgg4_bp_im32_soft_relu/data.pickle
- revised_supplemental/code/results/table2/bp_im32/2022-05-07_17-58-22_xpvgg4_bp_im32_soft_relu_run3/
- revised_supplemental/code/results/table2/bp_im32/2022-05-07_17-58-22_xpvgg4_bp_im32_soft_relu_run3/log.txt
- revised_supplemental/code/results/table2/bp_im32/2022-05-07_17-58-22_xpvgg4_bp_im32_soft_relu_run3/hyperparameters.json
- revised_supplemental/code/results/table2/bp_im32/2022-05-07_17-58-22_xpvgg4_bp_im32_soft_relu_run3/data.pickle
- revised_supplemental/code/results/table2/bp_im32/2022-05-07_17-56-49_xpvgg4_bp_im32_soft_relu_run2/
- revised_supplemental/code/results/table2/bp_im32/2022-05-07_17-56-49_xpvgg4_bp_im32_soft_relu_run2/hyperparameters.json
- revised_supplemental/code/results/table2/bp_im32/2022-05-07_17-56-49_xpvgg4_bp_im32_soft_relu_run2/log.txt
- revised_supplemental/code/results/table2/bp_im32/2022-05-07_17-56-49_xpvgg4_bp_im32_soft_relu_run2/data.pickle
- revised_supplemental/code/results/table2/ep_im32/
- revised_supplemental/code/results/table2/ep_im32/2022-04-26_09-32-48_xpvgg4_im32_soft_ep2_mholo1_bs256_run1/
- revised_supplemental/code/results/table2/ep_im32/2022-04-26_09-32-48_xpvgg4_im32_soft_ep2_mholo1_bs256_run1/hyperparameters.json
- revised_supplemental/code/results/table2/ep_im32/2022-04-26_09-32-48_xpvgg4_im32_soft_ep2_mholo1_bs256_run1/log.txt
- revised_supplemental/code/results/table2/ep_im32/2022-04-26_09-32-48_xpvgg4_im32_soft_ep2_mholo1_bs256_run1/data.pickle
- revised_supplemental/code/results/table2/ep_im32/2022-05-03_10-26-01_xpvgg4_im32_soft_ep2_mholo1_bs256_run2/
- revised_supplemental/code/results/table2/ep_im32/2022-05-03_10-26-01_xpvgg4_im32_soft_ep2_mholo1_bs256_run2/log.txt
- revised_supplemental/code/results/table2/ep_im32/2022-05-03_10-26-01_xpvgg4_im32_soft_ep2_mholo1_bs256_run2/hyperparameters.json
- revised_supplemental/code/results/table2/ep_im32/2022-05-03_10-26-01_xpvgg4_im32_soft_ep2_mholo1_bs256_run2/data.pickle
- revised_supplemental/code/results/table2/ep_im32/2022-05-08_19-04-32_xpvgg4_im32_soft_ep2_mholo1_bs256_run3/
- revised_supplemental/code/results/table2/ep_im32/2022-05-08_19-04-32_xpvgg4_im32_soft_ep2_mholo1_bs256_run3/log.txt
- revised_supplemental/code/results/table2/ep_im32/2022-05-08_19-04-32_xpvgg4_im32_soft_ep2_mholo1_bs256_run3/data.pickle
- revised_supplemental/code/results/table2/ep_im32/2022-05-08_19-04-32_xpvgg4_im32_soft_ep2_mholo1_bs256_run3/hyperparameters.json
- revised_supplemental/code/results/table2/ep_cif100/
- revised_supplemental/code/results/table2/ep_cif100/2022-05-10_12-51-45_xpvgg_cif100_soft_ep2_mholo1_beta1_wd1e-2_run3/
- revised_supplemental/code/results/table2/ep_cif100/2022-05-10_12-51-45_xpvgg_cif100_soft_ep2_mholo1_beta1_wd1e-2_run3/hyperparameters.json
- revised_supplemental/code/results/table2/ep_cif100/2022-05-10_12-51-45_xpvgg_cif100_soft_ep2_mholo1_beta1_wd1e-2_run3/log.txt
- revised_supplemental/code/results/table2/ep_cif100/2022-05-10_12-51-45_xpvgg_cif100_soft_ep2_mholo1_beta1_wd1e-2_run3/data.pickle
- revised_supplemental/code/results/table2/ep_cif100/2022-05-09_21-16-26_xpvgg_cif100_soft_ep2_mholo1_beta1_wd1e-2_run1/
- revised_supplemental/code/results/table2/ep_cif100/2022-05-09_21-16-26_xpvgg_cif100_soft_ep2_mholo1_beta1_wd1e-2_run1/log.txt
- revised_supplemental/code/results/table2/ep_cif100/2022-05-09_21-16-26_xpvgg_cif100_soft_ep2_mholo1_beta1_wd1e-2_run1/data.pickle
- revised_supplemental/code/results/table2/ep_cif100/2022-05-09_21-16-26_xpvgg_cif100_soft_ep2_mholo1_beta1_wd1e-2_run1/hyperparameters.json
- revised_supplemental/code/results/table2/ep_cif100/2022-05-10_12-50-54_xpvgg_cif100_soft_ep2_mholo1_beta1_wd1e-2_run2/
- revised_supplemental/code/results/table2/ep_cif100/2022-05-10_12-50-54_xpvgg_cif100_soft_ep2_mholo1_beta1_wd1e-2_run2/hyperparameters.json
- revised_supplemental/code/results/table2/ep_cif100/2022-05-10_12-50-54_xpvgg_cif100_soft_ep2_mholo1_beta1_wd1e-2_run2/log.txt
- revised_supplemental/code/results/table2/ep_cif100/2022-05-10_12-50-54_xpvgg_cif100_soft_ep2_mholo1_beta1_wd1e-2_run2/data.pickle
- revised_supplemental/code/results/table2/ep_cif10/
- revised_supplemental/code/results/table2/ep_cif10/2022-05-11_09-32-10_xpvgg_cif10_soft_ep2_mholo1_beta1_wd2e-3_run2/
- revised_supplemental/code/results/table2/ep_cif10/2022-05-11_09-32-10_xpvgg_cif10_soft_ep2_mholo1_beta1_wd2e-3_run2/log.txt
- revised_supplemental/code/results/table2/ep_cif10/2022-05-11_09-32-10_xpvgg_cif10_soft_ep2_mholo1_beta1_wd2e-3_run2/hyperparameters.json
- revised_supplemental/code/results/table2/ep_cif10/2022-05-11_09-32-10_xpvgg_cif10_soft_ep2_mholo1_beta1_wd2e-3_run2/data.pickle
- revised_supplemental/code/results/table2/ep_cif10/2022-05-11_08-54-30_xpvgg_cif10_soft_ep2_mholo1_beta1_wd2e-3_run1/
- revised_supplemental/code/results/table2/ep_cif10/2022-05-11_08-54-30_xpvgg_cif10_soft_ep2_mholo1_beta1_wd2e-3_run1/hyperparameters.json
- revised_supplemental/code/results/table2/ep_cif10/2022-05-11_08-54-30_xpvgg_cif10_soft_ep2_mholo1_beta1_wd2e-3_run1/log.txt
- revised_supplemental/code/results/table2/ep_cif10/2022-05-11_08-54-30_xpvgg_cif10_soft_ep2_mholo1_beta1_wd2e-3_run1/data.pickle
- revised_supplemental/code/results/table2/ep_cif10/2022-05-11_09-32-41_xpvgg_cif10_soft_ep2_mholo1_beta1_wd2e-3_run3/
- revised_supplemental/code/results/table2/ep_cif10/2022-05-11_09-32-41_xpvgg_cif10_soft_ep2_mholo1_beta1_wd2e-3_run3/hyperparameters.json
- revised_supplemental/code/results/table2/ep_cif10/2022-05-11_09-32-41_xpvgg_cif10_soft_ep2_mholo1_beta1_wd2e-3_run3/log.txt
- revised_supplemental/code/results/table2/ep_cif10/2022-05-11_09-32-41_xpvgg_cif10_soft_ep2_mholo1_beta1_wd2e-3_run3/data.pickle
- revised_supplemental/code/results/table2/bp_cif100/
- revised_supplemental/code/results/table2/bp_cif100/2022-05-09_21-00-09_xvgg4_bp_cif100_soft_relu_wd1e-2_run3/
- revised_supplemental/code/results/table2/bp_cif100/2022-05-09_21-00-09_xvgg4_bp_cif100_soft_relu_wd1e-2_run3/hyperparameters.json
- revised_supplemental/code/results/table2/bp_cif100/2022-05-09_21-00-09_xvgg4_bp_cif100_soft_relu_wd1e-2_run3/log.txt
- revised_supplemental/code/results/table2/bp_cif100/2022-05-09_21-00-09_xvgg4_bp_cif100_soft_relu_wd1e-2_run3/data.pickle
- revised_supplemental/code/results/table2/bp_cif100/2022-05-09_20-58-48_xvgg4_bp_cif100_soft_relu_wd1e-2_run2/
- revised_supplemental/code/results/table2/bp_cif100/2022-05-09_20-58-48_xvgg4_bp_cif100_soft_relu_wd1e-2_run2/hyperparameters.json
- revised_supplemental/code/results/table2/bp_cif100/2022-05-09_20-58-48_xvgg4_bp_cif100_soft_relu_wd1e-2_run2/log.txt
- revised_supplemental/code/results/table2/bp_cif100/2022-05-09_20-58-48_xvgg4_bp_cif100_soft_relu_wd1e-2_run2/data.pickle
- revised_supplemental/code/results/table2/bp_cif100/2022-05-09_17-32-52_xvgg4_bp_cif100_soft_relu_wd1e-2_run1/
- revised_supplemental/code/results/table2/bp_cif100/2022-05-09_17-32-52_xvgg4_bp_cif100_soft_relu_wd1e-2_run1/hyperparameters.json
- revised_supplemental/code/results/table2/bp_cif100/2022-05-09_17-32-52_xvgg4_bp_cif100_soft_relu_wd1e-2_run1/log.txt
- revised_supplemental/code/results/table2/bp_cif100/2022-05-09_17-32-52_xvgg4_bp_cif100_soft_relu_wd1e-2_run1/data.pickle
- revised_supplemental/code/results/table1/
- revised_supplemental/code/results/table1/noise/
- revised_supplemental/code/results/table1/noise/classic_ep_old/
- revised_supplemental/code/results/table1/noise/classic_ep_old/2022-05-18_15-14-01_xp_mlp_2h256_ep1_beta4e-1_noise4e-2_run3/
- revised_supplemental/code/results/table1/noise/classic_ep_old/2022-05-18_15-14-01_xp_mlp_2h256_ep1_beta4e-1_noise4e-2_run3/hyperparameters.json
- revised_supplemental/code/results/table1/noise/classic_ep_old/2022-05-18_15-14-01_xp_mlp_2h256_ep1_beta4e-1_noise4e-2_run3/log.txt
- revised_supplemental/code/results/table1/noise/classic_ep_old/2022-05-18_15-14-01_xp_mlp_2h256_ep1_beta4e-1_noise4e-2_run3/data.pickle
- revised_supplemental/code/results/table1/noise/classic_ep_old/2022-05-18_15-20-35_xp_mlp_2h256_ep1_beta4e-1_noise4e-2_run2/
- revised_supplemental/code/results/table1/noise/classic_ep_old/2022-05-18_15-20-35_xp_mlp_2h256_ep1_beta4e-1_noise4e-2_run2/hyperparameters.json
- revised_supplemental/code/results/table1/noise/classic_ep_old/2022-05-18_15-20-35_xp_mlp_2h256_ep1_beta4e-1_noise4e-2_run2/log.txt
- revised_supplemental/code/results/table1/noise/classic_ep_old/2022-05-18_15-20-35_xp_mlp_2h256_ep1_beta4e-1_noise4e-2_run2/data.pickle
- revised_supplemental/code/results/table1/noise/classic_ep_old/2022-05-18_15-07-47_xp_mlp_2h256_ep1_beta4e-1_noise4e-2_run1/
- revised_supplemental/code/results/table1/noise/classic_ep_old/2022-05-18_15-07-47_xp_mlp_2h256_ep1_beta4e-1_noise4e-2_run1/hyperparameters.json
- revised_supplemental/code/results/table1/noise/classic_ep_old/2022-05-18_15-07-47_xp_mlp_2h256_ep1_beta4e-1_noise4e-2_run1/log.txt
- revised_supplemental/code/results/table1/noise/classic_ep_old/2022-05-18_15-07-47_xp_mlp_2h256_ep1_beta4e-1_noise4e-2_run1/data.pickle
- revised_supplemental/code/results/table1/noise/hep/
- revised_supplemental/code/results/table1/noise/hep/2022-05-18_16-44-22_xp_mlp_2h256_ep10_beta4e-1_noise4e-2_run3/
- revised_supplemental/code/results/table1/noise/hep/2022-05-18_16-44-22_xp_mlp_2h256_ep10_beta4e-1_noise4e-2_run3/hyperparameters.json
- revised_supplemental/code/results/table1/noise/hep/2022-05-18_16-44-22_xp_mlp_2h256_ep10_beta4e-1_noise4e-2_run3/log.txt
- revised_supplemental/code/results/table1/noise/hep/2022-05-18_16-44-22_xp_mlp_2h256_ep10_beta4e-1_noise4e-2_run3/data.pickle
- revised_supplemental/code/results/table1/noise/hep/2022-05-18_16-34-03_xp_mlp_2h256_ep10_beta4e-1_noise4e-2_run1/
- revised_supplemental/code/results/table1/noise/hep/2022-05-18_16-34-03_xp_mlp_2h256_ep10_beta4e-1_noise4e-2_run1/data.pickle
- revised_supplemental/code/results/table1/noise/hep/2022-05-18_16-34-03_xp_mlp_2h256_ep10_beta4e-1_noise4e-2_run1/hyperparameters.json
- revised_supplemental/code/results/table1/noise/hep/2022-05-18_16-34-03_xp_mlp_2h256_ep10_beta4e-1_noise4e-2_run1/log.txt
- revised_supplemental/code/results/table1/noise/hep/2022-05-18_19-59-40_xp_mlp_2h256_ep10_beta4e-1_noise4e-2_run2/
- revised_supplemental/code/results/table1/noise/hep/2022-05-18_19-59-40_xp_mlp_2h256_ep10_beta4e-1_noise4e-2_run2/data.pickle
- revised_supplemental/code/results/table1/noise/hep/2022-05-18_19-59-40_xp_mlp_2h256_ep10_beta4e-1_noise4e-2_run2/hyperparameters.json
- revised_supplemental/code/results/table1/noise/hep/2022-05-18_19-59-40_xp_mlp_2h256_ep10_beta4e-1_noise4e-2_run2/log.txt
- revised_supplemental/code/results/table1/noise/continuous_hep/
- revised_supplemental/code/results/table1/noise/continuous_hep/2022-05-18_22-28-21_xp_mlp_2h256_oscEP_N10_beta4e-1_noise4e-2_run3/
- revised_supplemental/code/results/table1/noise/continuous_hep/2022-05-18_22-28-21_xp_mlp_2h256_oscEP_N10_beta4e-1_noise4e-2_run3/hyperparameters.json
- revised_supplemental/code/results/table1/noise/continuous_hep/2022-05-18_22-28-21_xp_mlp_2h256_oscEP_N10_beta4e-1_noise4e-2_run3/log.txt
- revised_supplemental/code/results/table1/noise/continuous_hep/2022-05-18_22-28-21_xp_mlp_2h256_oscEP_N10_beta4e-1_noise4e-2_run3/data.pickle
- revised_supplemental/code/results/table1/noise/continuous_hep/2022-05-18_18-41-05_xp_mlp_2h256_oscEP_N10_beta4e-1_noise4e-2_run1/
- revised_supplemental/code/results/table1/noise/continuous_hep/2022-05-18_18-41-05_xp_mlp_2h256_oscEP_N10_beta4e-1_noise4e-2_run1/hyperparameters.json
- revised_supplemental/code/results/table1/noise/continuous_hep/2022-05-18_18-41-05_xp_mlp_2h256_oscEP_N10_beta4e-1_noise4e-2_run1/data.pickle
- revised_supplemental/code/results/table1/noise/continuous_hep/2022-05-18_18-41-05_xp_mlp_2h256_oscEP_N10_beta4e-1_noise4e-2_run1/log.txt
- revised_supplemental/code/results/table1/noise/continuous_hep/2022-05-18_18-41-53_xp_mlp_2h256_oscEP_N10_beta4e-1_noise4e-2_run2/
- revised_supplemental/code/results/table1/noise/continuous_hep/2022-05-18_18-41-53_xp_mlp_2h256_oscEP_N10_beta4e-1_noise4e-2_run2/hyperparameters.json
- revised_supplemental/code/results/table1/noise/continuous_hep/2022-05-18_18-41-53_xp_mlp_2h256_oscEP_N10_beta4e-1_noise4e-2_run2/log.txt
- revised_supplemental/code/results/table1/noise/continuous_hep/2022-05-18_18-41-53_xp_mlp_2h256_oscEP_N10_beta4e-1_noise4e-2_run2/data.pickle
- revised_supplemental/code/results/table1/noise/classic_ep_1e-1/
- revised_supplemental/code/results/table1/noise/classic_ep_1e-1/2022-08-01_18-22-15_xp_mlp_2h256_ep1_beta1e-1_noise4e-2_run3/
- revised_supplemental/code/results/table1/noise/classic_ep_1e-1/2022-08-01_18-22-15_xp_mlp_2h256_ep1_beta1e-1_noise4e-2_run3/hyperparameters.json
- revised_supplemental/code/results/table1/noise/classic_ep_1e-1/2022-08-01_18-22-15_xp_mlp_2h256_ep1_beta1e-1_noise4e-2_run3/log.txt
- revised_supplemental/code/results/table1/noise/classic_ep_1e-1/2022-08-01_18-22-15_xp_mlp_2h256_ep1_beta1e-1_noise4e-2_run3/data.pickle
- revised_supplemental/code/results/table1/noise/classic_ep_1e-1/2022-08-01_18-22-13_xp_mlp_2h256_ep1_beta1e-1_noise4e-2_run2/
- revised_supplemental/code/results/table1/noise/classic_ep_1e-1/2022-08-01_18-22-13_xp_mlp_2h256_ep1_beta1e-1_noise4e-2_run2/hyperparameters.json
- revised_supplemental/code/results/table1/noise/classic_ep_1e-1/2022-08-01_18-22-13_xp_mlp_2h256_ep1_beta1e-1_noise4e-2_run2/log.txt
- revised_supplemental/code/results/table1/noise/classic_ep_1e-1/2022-08-01_18-22-13_xp_mlp_2h256_ep1_beta1e-1_noise4e-2_run2/data.pickle
- revised_supplemental/code/results/table1/noise/classic_ep_1e-1/2022-08-01_18-22-13_xp_mlp_2h256_ep1_beta1e-1_noise4e-2_run1/
- revised_supplemental/code/results/table1/noise/classic_ep_1e-1/2022-08-01_18-22-13_xp_mlp_2h256_ep1_beta1e-1_noise4e-2_run1/hyperparameters.json
- revised_supplemental/code/results/table1/noise/classic_ep_1e-1/2022-08-01_18-22-13_xp_mlp_2h256_ep1_beta1e-1_noise4e-2_run1/log.txt
- revised_supplemental/code/results/table1/noise/classic_ep_1e-1/2022-08-01_18-22-13_xp_mlp_2h256_ep1_beta1e-1_noise4e-2_run1/data.pickle
- revised_supplemental/code/results/table1/noise/classic_ep_4e-1/
- revised_supplemental/code/results/table1/noise/classic_ep_4e-1/2022-08-01_17-36-01_xp_mlp_2h256_ep1_beta4e-1_noise4e-2_run3/
- revised_supplemental/code/results/table1/noise/classic_ep_4e-1/2022-08-01_17-36-01_xp_mlp_2h256_ep1_beta4e-1_noise4e-2_run3/hyperparameters.json
- revised_supplemental/code/results/table1/noise/classic_ep_4e-1/2022-08-01_17-36-01_xp_mlp_2h256_ep1_beta4e-1_noise4e-2_run3/log.txt
- revised_supplemental/code/results/table1/noise/classic_ep_4e-1/2022-08-01_17-36-01_xp_mlp_2h256_ep1_beta4e-1_noise4e-2_run3/data.pickle
- revised_supplemental/code/results/table1/noise/classic_ep_4e-1/2022-08-01_17-36-01_xp_mlp_2h256_ep1_beta4e-1_noise4e-2_run2/
- revised_supplemental/code/results/table1/noise/classic_ep_4e-1/2022-08-01_17-36-01_xp_mlp_2h256_ep1_beta4e-1_noise4e-2_run2/log.txt
- revised_supplemental/code/results/table1/noise/classic_ep_4e-1/2022-08-01_17-36-01_xp_mlp_2h256_ep1_beta4e-1_noise4e-2_run2/hyperparameters.json
- revised_supplemental/code/results/table1/noise/classic_ep_4e-1/2022-08-01_17-36-01_xp_mlp_2h256_ep1_beta4e-1_noise4e-2_run2/data.pickle
- revised_supplemental/code/results/table1/noise/classic_ep_4e-1/2022-08-01_17-35-33_xp_mlp_2h256_ep1_beta4e-1_noise4e-2_run1/
- revised_supplemental/code/results/table1/noise/classic_ep_4e-1/2022-08-01_17-35-33_xp_mlp_2h256_ep1_beta4e-1_noise4e-2_run1/hyperparameters.json
- revised_supplemental/code/results/table1/noise/classic_ep_4e-1/2022-08-01_17-35-33_xp_mlp_2h256_ep1_beta4e-1_noise4e-2_run1/log.txt
[truncated: 76 more entries]
