# Supplementary material
Source: ML conference proceedings conference paper supplement (https://proceedings.neurips.cc/paper_files/paper/2022/hash/545a114e655f9d25ba0d56ea9a01fc6e-Abstract.html)
Supplement: Supplementary file 1 [file 545a114e655f9d25ba0d56ea9a01fc6e-Supplemental-Conference.zip › revised_supplemental/code/plot_figures_revision.ipynb]

# %% [code]
import matplotlib
import matplotlib.pyplot as plt
from matplotlib import rc, rcParams
from matplotlib import cm
import matplotlib.colors as colors
from matplotlib.colors import LinearSegmentedColormap, ListedColormap
import colorsys

import numpy as np
import pickle
import glob
import os

# %% [code]
def load_data(path):    
    with open(path, 'rb') as f:                                        
        data = pickle.load(f)                                                   
    return data

def my_sigmoid(x):
    return 1/(1+np.exp(-4*x+2))

def holotanh(x):
    return x/(1 + np.exp(-x)) + (1-x)/(1 + np.exp(-(x-1)) )

def identity(x):
    return x

def lighten_color(color, amount=0.5):
    """
    Lightens the given color by multiplying (1-luminosity) by the given amount.
    Input can be matplotlib color string, hex string, or RGB tuple.

    Examples:
    >> lighten_color('g', 0.3)
    >> lighten_color('#F034A3', 0.6)
    >> lighten_color((.3,.55,.1), 0.5)
    """

    try:
        c = colors.cnames[color]
    except:
        c = color
    c = colorsys.rgb_to_hls(*colors.to_rgb(c))
    return colorsys.hls_to_rgb(c[0], 1 - amount * (1 - c[1]), c[2])

# %% [code]
# Fig 2a) Left

rcParams['axes.linewidth'] = 2
rcParams['xtick.labelsize'] = 25
rcParams['ytick.labelsize'] = 25
rcParams['axes.titlesize'] = 30
rcParams['axes.labelsize'] = 25
rcParams['lines.markersize'] = 2
rcParams['text.latex.preamble'] = r'\usepackage{amsmath, amssymb, amsfonts}'
rcParams.update({'figure.autolayout': True})
rc('text', usetex=True)           # r"$...$" for latex string

label_pad = 5
basic_colors = cm.get_cmap('Dark2').colors


runs = glob.glob('./results/fig2ac/*')
runs = sorted(runs, reverse=True)
run = runs[1]


data = load_data(run+'/neural_data.pickle')
act = identity
N = len(data['complex'])
free_eq = data['free_eq']
n_layers = len(free_eq)


for layer_idx in [1]:
    
    fig = plt.figure(figsize=(3, 3))
    
    complex_eqs = np.concatenate([data['complex'][str(t)][layer_idx] for t in range(N)], axis=0)
    neurons_in_layer = complex_eqs.shape[1]
    
    for neuron_idx in range(neurons_in_layer):
        
        s_star_beta = act(complex_eqs[:, neuron_idx].flatten())
        s_star_0 = act(free_eq[layer_idx][0, neuron_idx])
        delta_s = (s_star_beta - s_star_0)
        
        plt.plot(np.real(delta_s), np.imag(delta_s), color=basic_colors[neuron_idx])
        
        for t in range(N):
            sz = 5 + t
            plt.scatter(np.real(delta_s[t]), np.imag(delta_s[t]), s=sz, color=basic_colors[neuron_idx])
    
    
    
    axes = plt.gca()
    
    axes.set_axisbelow(True)
    axes.ticklabel_format(style='sci', axis='both', scilimits=(0,0))
    
    axes.spines['right'].set_visible(False)
    axes.spines['top'].set_visible(False)
    axes.spines['bottom'].set_visible(False)
    axes.spines['left'].set_visible(False)
    
    axes.xaxis.set_ticks([0])
    
    # shape of major xticks
    axes.xaxis.set_tick_params(direction='out', labelsize=20, length=6, width=2, top=False, bottom=True,
                               pad=label_pad, which='major')


    # shape of minor xticks
    axes.xaxis.set_tick_params(direction='in', labelsize=25, length=3, width=3, top=False, bottom=False,
                               pad=label_pad, which='minor')


    axes.yaxis.set_ticks([0])

    # shape of major yticks
    axes.yaxis.set_tick_params(direction='out', labelsize=20, length=6, width=2, right=False, left=True,
                               pad=label_pad, which='major')

    # shape of minor yticks
    axes.yaxis.set_tick_params(direction='in', labelsize=25, length=3, width=3, right=False, left=False,
                               pad=label_pad, which='minor')
    
    axes.set_axisbelow(True)
    plt.axis('equal')
    plt.grid()
    
plt.show()

# %% [code]
# Fig 2a) right

rcParams['axes.linewidth'] = 2
rcParams['xtick.labelsize'] = 25
rcParams['ytick.labelsize'] = 25
rcParams['axes.titlesize'] = 30
rcParams['axes.labelsize'] = 25
rcParams['lines.markersize'] = 5
rcParams['text.latex.preamble'] = r'\usepackage{amsmath, amssymb, amsfonts}'
rcParams.update({'figure.autolayout': True})
rc('text', usetex=True)           # r"$...$" for latex string
basic_colors = cm.get_cmap('Dark2').colors


runs = glob.glob('./results/fig2ac/*')
runs = sorted(runs, reverse=True)
run = runs[1]
print(run)
data = load_data(run+'/neural_data.pickle')
activation = identity
N = len(data['complex'])
free_eq = data['free_eq']
n_layers = len(free_eq)


    

for layer_idx in [1]:
    
    fig = plt.figure(figsize=(5, 3))
    
    complex_eqs = np.concatenate([data['complex'][str(t)][layer_idx] for t in range(N)], axis=0)
    neurons_in_layer = complex_eqs.shape[1]
    
    for neuron_idx in range(neurons_in_layer):
        
        s_star_beta = act(complex_eqs[:, neuron_idx].flatten())
        s_star_0 = act(free_eq[layer_idx][0, neuron_idx])
        delta_s = (s_star_beta - s_star_0)
        real_delta_s_x2 = np.concatenate([np.real(delta_s), np.real(delta_s)])
        
        plt.plot(real_delta_s_x2, color=basic_colors[neuron_idx])
        plt.scatter(np.arange(0, 2*N, 1), real_delta_s_x2, s=6, color=basic_colors[neuron_idx])
        

    
    axes = plt.gca()
    
    axes.spines['right'].set_visible(False)
    axes.spines['top'].set_visible(False)
    
    axes.ticklabel_format(style='sci', axis='y', scilimits=(0,0))
    # shape of major xticks
    axes.xaxis.set_tick_params(direction='out', labelsize=20, length=6, width=2, top=False, bottom=True,
                               pad=label_pad, which='major')


    # shape of minor xticks
    axes.xaxis.set_tick_params(direction='out', labelsize=25, length=3, width=2, top=False, bottom=True,
                               pad=label_pad, which='minor')

    axes.yaxis.set_ticks([-5e-3, 0, 5e-3])

    # shape of major yticks
    axes.yaxis.set_tick_params(direction='out', labelsize=20, length=6, width=2, right=False, left=True,
                               pad=label_pad, which='major')

    # shape of minor yticks
    axes.yaxis.set_tick_params(direction='out', labelsize=25, length=3, width=2, right=False, left=True,
                               pad=label_pad, which='minor')

    axes.set_axisbelow(True)
    plt.xlabel(r'$\text{timesteps}$')
    plt.ylabel(r'$\text{Real part}$')
plt.show()

# %% [code]
# plot fractal

runs = glob.glob('./results/fig2b/*')
runs = sorted(runs, reverse=True)

run = runs[0]
print(run)

data = load_data(run+'/data.pickle')


rcParams['axes.linewidth'] = 3
rcParams['xtick.labelsize'] = 25
rcParams['ytick.labelsize'] = 25
rcParams['axes.titlesize'] = 30
rcParams['axes.labelsize'] = 20
rcParams['lines.markersize'] = 2
rcParams['text.latex.preamble'] = r'\usepackage{amsmath, amssymb, amsfonts}'
rcParams.update({'figure.autolayout': True})
rc('text', usetex=True)           # r"$...$" for latex string


plt.figure(figsize=(6, 6))  

legend_size = 15
label_pad = 5

cmap_name = "PuBu_r"

xname = ''                          # r'$\operatorname{Re}(\beta)$'
xlim = data['xrange']               # (0.0, 1.0)
xticks = None                       # [xlim[0]/2, 0.0, xlim[1]/2]
minor_xticks = None                 # 10 (for every 10)

yname = ''                          # r'$\operatorname{Im}(\beta)$'
ylim = data['yrange']
yticks = None                       # [ylim[0]/2, 0.0, ylim[1]/2]
minor_yticks = None 

X, Y, z = data['dyn_stab'] 

plt.pcolor(X, Y, z,
           norm=colors.LogNorm(vmin=z.min(), vmax=z.max()),
           cmap=plt.cm.get_cmap(cmap_name),
           shading='auto')


axes = plt.gca()

axes.set_xlabel(xname, fontsize = 35)
if xticks:
    axes.xaxis.set_ticks(xticks)


# shape of major xticks
axes.xaxis.set_tick_params(direction='out', labelsize=30, length=6, width=3, top=True, bottom=True,
                           pad=label_pad, which='major')


# shape of minor xticks
axes.xaxis.set_tick_params(direction='in', labelsize=20, length=6, width=3, top=True, bottom=True,
                           pad=label_pad, which='minor')

if minor_xticks:
    axes.xaxis.set_minor_locator(matplotlib.ticker.MultipleLocator(minor_xticks))
if xlim:
    axes.set_xlim(*xlim)
if ylim:
    axes.set_ylim(*ylim)


axes.set_ylabel(yname, fontsize = 35)
if yticks:
    axes.yaxis.set_ticks(yticks)


# shape of major yticks
axes.yaxis.set_tick_params(direction='out', labelsize=30, length=6, width=3, right=True, left=True,
                           pad=label_pad, which='major')

# shape of minor yticks
axes.yaxis.set_tick_params(direction='in', labelsize=35, length=6, width=3, right=True, left=True,
                           pad=label_pad, which='minor')

if minor_yticks:
    axes.yaxis.set_minor_locator(matplotlib.ticker.MultipleLocator(minor_yticks))


plt.gca().set_aspect('equal')
plt.show()

# %% [code]
# Fig 2c)

rcParams['axes.linewidth'] = 2
rcParams['xtick.labelsize'] = 25
rcParams['ytick.labelsize'] = 25
rcParams['axes.titlesize'] = 30
rcParams['axes.labelsize'] = 25
rcParams['lines.markersize'] = 2
rcParams['text.latex.preamble'] = r'\usepackage{amsmath, amssymb, amsfonts}'
rcParams.update({'figure.autolayout': True})
rc('text', usetex=True)           # r"$...$" for latex string

basic_colors = ['#0077BB', '#33BBEE', '#EE7733', '#CCBB44']

runs = glob.glob('./results/fig2ac/*')
runs = sorted(runs, reverse=False)

for run in runs:

    data = load_data(f'{run}/neural_data.pickle')
    act = identity
    N = len(data['complex'])
    free_eq = data['free_eq']
    n_layers = len(free_eq)
    grad = data['grad']
    abs_beta = data['beta']
    complex_betas = abs_beta * np.exp( 2 * 1j * np.pi * np.arange(0, N, 1)/N )


    i, j = 3, 2
    layer = 2


    complex_eqs = []
    for layer_idx in range(n_layers):
        complex_eqs.append(np.concatenate([data['complex'][str(t)][layer_idx] for t in range(N)], axis=0))


    minus_grad = - grad[f'xphi/~/fc_{layer}']['w'][i,j]

    sisj_0 = act(free_eq[layer-1][0, i].flatten())  *  act(free_eq[layer][0, j].flatten())

    sisj_beta = act(complex_eqs[layer-1][:, i].flatten())  *  act(complex_eqs[layer][:, j].flatten())

    delta_sisj_abs_beta = (sisj_beta - sisj_0)/abs_beta


    fig = plt.figure(figsize=(3, 3))


    plt.plot(np.real(delta_sisj_abs_beta),
             np.imag(delta_sisj_abs_beta),
             color=basic_colors[0], label=r'$\tilde{s}^{\ast}_{i}(t)\tilde{s}^{\ast}_{j}(t)/|\beta|$')


    delta_sisj_complex_beta = (sisj_beta - sisj_0)/complex_betas
    plt.plot(np.real(delta_sisj_complex_beta),
             np.imag(delta_sisj_complex_beta),
             color=basic_colors[1], 
             label=r'$\tilde{s}^{\ast}_{i}(t)\tilde{s}^{\ast}_{j}(t)e^{-2\mathrm{i}\pi t/T}/|\beta|$')

    plt.scatter(np.mean(np.real(delta_sisj_complex_beta)),
                np.mean(np.imag(delta_sisj_complex_beta)),
                s=80, color=basic_colors[2], marker='x', linewidths=2)


    for t in range(N):
        sz = 5
        plt.scatter(np.real(delta_sisj_abs_beta)[t],
                    np.imag(delta_sisj_abs_beta)[t], 
                    s=sz, color=basic_colors[0])

        plt.scatter(np.real(delta_sisj_complex_beta)[t],
                    np.imag(delta_sisj_complex_beta)[t],
                    s=3, color=basic_colors[1])


    plt.scatter(minus_grad, 0, s=100, marker='+', color='#BBBBBB', linewidths=2)


    axes = plt.gca()

    axes.set_axisbelow(True)
    axes.ticklabel_format(style='sci', axis='both', scilimits=(0,0))

    axes.spines['right'].set_visible(False)
    axes.spines['top'].set_visible(False)
    axes.spines['bottom'].set_visible(False)
    axes.spines['left'].set_visible(False)


    axes.xaxis.set_ticks([0])

    # shape of major xticks
    axes.xaxis.set_tick_params(direction='out', labelsize=20, length=6, width=2, top=False, bottom=True,
                               pad=label_pad, which='major')


    # shape of minor xticks
    axes.xaxis.set_tick_params(direction='in', labelsize=25, length=3, width=3, top=False, bottom=True,
                               pad=label_pad, which='minor')

    axes.yaxis.set_ticks([0])

    # shape of major yticks
    axes.yaxis.set_tick_params(direction='out', labelsize=20, length=6, width=2, right=False, left=True,
                               pad=label_pad, which='major')

    # shape of minor yticks
    axes.yaxis.set_tick_params(direction='in', labelsize=25, length=3, width=3, right=False, left=True,
                               pad=label_pad, which='minor')

    axes.set_axisbelow(True)
    plt.axis('equal')
    plt.grid()
    plt.show()

# %% [code]
# Fig 2d)

runs = glob.glob('./results/fig2d/*')
runs = sorted(runs, reverse=True)

run = runs[0]
print(run)


data = load_data(run + '/data.pickle')
basic_colors = cm.get_cmap('tab10').colors


rcParams['axes.linewidth'] = 2
rcParams['xtick.labelsize'] = 20
rcParams['ytick.labelsize'] = 10
rcParams['axes.titlesize'] = 25
rcParams['axes.labelsize'] = 5
rcParams['lines.markersize'] = 2
rcParams['text.latex.preamble'] = r'\usepackage{amsmath, amssymb, amsfonts}'
rcParams.update({'figure.autolayout': True})
rc('text', usetex=True)           # r"$...$" for latex string


plt.figure(figsize=(5,3))

axes_name_size = 20
legend_size = 13
label_pad = 5
title = ''

xname = r'$|\beta|$'
xlim = (0.0, 0.9)           
xticks = None 
xticks_label = None
minor_xticks = None   

yname = r'Cosine similarity'
ylim = (0.98, 1.001)
yticks = None 
yticks_label = None
minor_yticks = None 


plt.axhline(y=1.0, color='#BBBBBB', label='True gradient')


for idx, (key, y) in enumerate(data['cos']['total'].items()):
    if key==1:
        legend = 'Classic EP'
    else:
        legend = 'Holomorphic EP'
    plt.plot(data['x'], y, label=legend, linewidth=2, color=basic_colors[idx])


axes = plt.gca()

axes.set_xlabel(xname, fontsize = axes_name_size)
if xticks:
    axes.xaxis.set_ticks(xticks)

if xticks_label:
    axes.set_xticklabels(xticks_label)

axes.spines['right'].set_visible(False)
axes.spines['top'].set_visible(False)


# shape of major xticks
axes.xaxis.set_tick_params(direction='out', labelsize=20, length=6, width=2, top=False, bottom=True,
                           pad=label_pad, which='major')


# shape of minor xticks
axes.xaxis.set_tick_params(direction='out', labelsize=20, length=6, width=2, top=False, bottom=True,
                           pad=label_pad, which='minor')

if minor_xticks:
    axes.xaxis.set_minor_locator(matplotlib.ticker.MultipleLocator(minor_xticks))
if xlim:
    axes.set_xlim(*xlim)
if ylim:
    axes.set_ylim(*ylim)


axes.set_ylabel(yname, fontsize = axes_name_size)


if yticks:
    axes.yaxis.set_ticks(yticks)

if yticks_label:
    axes.set_yticklabels(yticks_label)

# shape of major yticks
axes.yaxis.set_tick_params(direction='out', labelsize=20, length=6, width=2, right=False, left=True,
                           pad=label_pad, which='major')

# shape of minor yticks
axes.yaxis.set_tick_params(direction='out', labelsize=20, length=6, width=2, right=False, left=True,
                           pad=label_pad, which='minor')

if minor_yticks:
    axes.yaxis.set_minor_locator(matplotlib.ticker.MultipleLocator(minor_yticks))

plt.title(title)

plt.legend(prop={'size': legend_size}, loc='best', framealpha = 0.0, ncol=1) 


plt.show()
plt.close()

# %% [code]
# Fig 3a)

rcParams['axes.linewidth'] = 2
rcParams['xtick.labelsize'] = 20
rcParams['ytick.labelsize'] = 20
rcParams['axes.titlesize'] = 40
rcParams['axes.labelsize'] = 25
rcParams['lines.markersize'] = 2
rcParams['text.latex.preamble'] = r'\usepackage{amsmath, amssymb, amsfonts}'
rcParams.update({'figure.autolayout': True})
rc('text', usetex=True)           # r"$...$" for latex string


main_color = cm.get_cmap('tab10').colors[1]
basic_colors = [lighten_color(main_color, darkn) for darkn in [1.5, 1.2, 1.0, 0.5, 0.7]]

label_values = [r'$T_{\text{osc}}=40$', r'$T_{\text{osc}}=30$', r'$T_{\text{osc}}=20$', r'$T_{\text{osc}}=5$',
                r'$T_{\text{osc}}=10$']

runs = glob.glob('./results/fig3ab/*')

runs = sorted(runs, reverse=True)

all_runs = {run: load_data(f'{run}/data.pickle') for run in runs}


plt.figure(figsize=(6,3))

legend_size = 15
label_pad = 5
title = ''

xname = r'Oscillation periods'
xlim = None
xticks = [0, 10, 20, 30, 40]
minor_xticks = None

yname = r'Cosine similarity'
ylim = (0, 7.5)
yticks = [0, 2, 4, 6] #list(reversed([-1e-6, -1e-4, -1e-2, -1e0]))
yticks_label = [r'$0$', r'$1-10^{-2}$', r'$1-10^{-4}$', r'$1-10^{-6}$'] 
minor_yticks = None 

plt.axhline(y=7.2, color='#BBBBBB', linestyle=':', label='1 up to mach. prec.')

for idx, (run, dictio) in enumerate(all_runs.items()):
    cos_dissim = - np.log10(1.0 - np.array(dictio['cont_cos']))
    cos_dissim = np.nan_to_num(cos_dissim, nan=7.2, posinf=7.2)
    plt.plot(cos_dissim, linewidth=2, color=basic_colors[idx]) # label=label_values[idx],


axes = plt.gca()

axes.set_xlabel(xname, fontsize = 18)
if xticks:
    axes.xaxis.set_ticks(xticks)

# axes.set_yscale('symlog')    

axes.spines['right'].set_visible(False)
axes.spines['top'].set_visible(False)


# shape of major xticks
axes.xaxis.set_tick_params(direction='out', labelsize=20, length=6, width=2, top=False, bottom=True,
                           pad=label_pad, which='major')


# shape of minor xticks
axes.xaxis.set_tick_params(direction='in', labelsize=35, length=6, width=3, top=True, bottom=True,
                           pad=label_pad, which='minor')

if minor_xticks:
    axes.xaxis.set_minor_locator(matplotlib.ticker.MultipleLocator(minor_xticks))
if xlim:
    axes.set_xlim(*xlim)
if ylim:
    axes.set_ylim(*ylim)


axes.set_ylabel(yname, fontsize = 18)
if yticks:
    axes.yaxis.set_ticks(yticks)


if yticks_label:
    axes.set_yticklabels(yticks_label)
    

# shape of major yticks
axes.yaxis.set_tick_params(direction='out', labelsize=20, length=6, width=2, top=False, bottom=True,
                           pad=label_pad, which='major')

# shape of minor yticks
axes.yaxis.set_tick_params(direction='in', labelsize=35, length=6, width=3, right=False, left=False,
                           pad=label_pad, which='minor')

if minor_yticks:
    axes.yaxis.set_minor_locator(matplotlib.ticker.MultipleLocator(minor_yticks))

plt.title(title)

plt.legend(framealpha = 0.0)
plt.show()

# %% [code]
fig, ax = plt.subplots(figsize=(6, 1))
fig.subplots_adjust(bottom=0.5)

main_color = cm.get_cmap('tab10').colors[1]
basic_colors = [lighten_color(main_color, darkn) for darkn in [0.5, 0.7, 1.0, 1.2, 1.5]]

newcmp = LinearSegmentedColormap.from_list('my_list', basic_colors, N=50)
norm = matplotlib.colors.Normalize(vmin=5, vmax=400)

fig.colorbar(matplotlib.cm.ScalarMappable(norm=norm, cmap=newcmp),
             cax=ax, orientation='horizontal', label=r'$T_{\text{osc}}$')

ax.xaxis.set_tick_params(direction='out', labelsize=20, length=6, width=2, top=True, bottom=False,
                         pad=label_pad, which='major')
fig.tight_layout()

plt.show()

# %% [code]
# Fig 3b


rcParams['axes.linewidth'] = 2
rcParams['xtick.labelsize'] = 20
rcParams['ytick.labelsize'] = 20
rcParams['axes.titlesize'] = 40
rcParams['axes.labelsize'] = 25
rcParams['lines.markersize'] = 2
rcParams['text.latex.preamble'] = r'\usepackage{amsmath, amssymb, amsfonts}'
rcParams.update({'figure.autolayout': True})
rc('text', usetex=True)


basic_colors = cm.get_cmap('tab10').colors[1]


runs = glob.glob('./results/fig3ab/*')

runs = sorted(runs, reverse=True)

all_runs = {run: load_data(f'{run}/data.pickle') for run in runs}


plt.figure(figsize=(4,3))

legend_size = 15
label_pad = 5
title = ''

xname = r'Time steps for one period'
xlim = None
xticks = [0, 200, 400]
minor_xticks = None


yname = r'$\|\Delta \boldsymbol{\sigma} \|_{2}$'
ylim = (-5.5, -1.5)
yticks = [-5, -4, -3, -2]
yticks_label = [r'$10^{-5}$', r'$10^{-4}$', r'$10^{-3}$', r'$10^{-2}$']
minor_yticks = None 


absc = [400, 300, 200, 50, 100]
log_L2s = []

for idx, (run, dictio) in enumerate(all_runs.items()):
    log_L2s.append(np.array(dictio['mean_log_L2s']).mean())
    

    
plt.scatter(absc, log_L2s, s=25)


axes = plt.gca()

axes.set_xlabel(xname, fontsize = 18)
if xticks:
    axes.xaxis.set_ticks(xticks)


axes.spines['right'].set_visible(False)
axes.spines['top'].set_visible(False)


# shape of major xticks
axes.xaxis.set_tick_params(direction='out', labelsize=20, length=6, width=2, top=False, bottom=True,
                           pad=label_pad, which='major')


# shape of minor xticks
axes.xaxis.set_tick_params(direction='in', labelsize=35, length=6, width=3, top=True, bottom=True,
                           pad=label_pad, which='minor')

if minor_xticks:
    axes.xaxis.set_minor_locator(matplotlib.ticker.MultipleLocator(minor_xticks))
if xlim:
    axes.set_xlim(*xlim)
if ylim:
    axes.set_ylim(*ylim)


axes.set_ylabel(yname, fontsize = 18)
if yticks:
    axes.yaxis.set_ticks(yticks)


if yticks_label:
    axes.set_yticklabels(yticks_label)
    

# shape of major yticks
axes.yaxis.set_tick_params(direction='out', labelsize=20, length=6, width=2, top=False, bottom=True,
                           pad=label_pad, which='major')

# shape of minor yticks
axes.yaxis.set_tick_params(direction='in', labelsize=35, length=6, width=3, right=False, left=False,
                           pad=label_pad, which='minor')

if minor_yticks:
    axes.yaxis.set_minor_locator(matplotlib.ticker.MultipleLocator(minor_yticks))

plt.title(title)
plt.show()

# %% [code]
# Fig 3c

runs = glob.glob('./results/fig3c/*')
runs = sorted(runs, reverse=True)

run = runs[0]

print(run)

data = load_data(run + '/data.pickle')


basic_colors = cm.get_cmap('tab10').colors


rcParams['axes.linewidth'] = 2
rcParams['xtick.labelsize'] = 20
rcParams['ytick.labelsize'] = 10
rcParams['axes.titlesize'] = 25
rcParams['axes.labelsize'] = 5
rcParams['lines.markersize'] = 2
rcParams['text.latex.preamble'] = r'\usepackage{amsmath, amssymb, amsfonts}'
rcParams.update({'figure.autolayout': True})
rc('text', usetex=True)           # r"$...$" for latex string


plt.figure(figsize=(5,3))

axes_name_size = 20
legend_size = 13
label_pad = 5
title = ''

xname = r'$|\beta|$'
xlim = (0.0, 4.)
xticks = None
xticks_label = None
minor_xticks = None

yname = r'Cosine similarity'
ylim = (0.9, 1.001)
yticks = None #[0.99, 1.0]
yticks_label = None
minor_yticks = None 


plt.axhline(y=1.0, color='#BBBBBB', label='True gradient')


for idx, (key, y) in enumerate(data['cos']['total'].items()):
    if key==1:
        legend = 'Classic EP'
    else:
        legend = 'Holomorphic EP'
    plt.plot(data['x'], y, label=legend, linewidth=2, color=basic_colors[idx])


axes = plt.gca()


axes.set_xlabel(xname, fontsize = axes_name_size)
if xticks:
    axes.xaxis.set_ticks(xticks)

if xticks_label:
    axes.set_xticklabels(xticks_label)

axes.spines['right'].set_visible(False)
axes.spines['top'].set_visible(False)


# shape of major xticks
axes.xaxis.set_tick_params(direction='out', labelsize=20, length=6, width=2, top=False, bottom=True,
                           pad=label_pad, which='major')


# shape of minor xticks
axes.xaxis.set_tick_params(direction='out', labelsize=20, length=6, width=2, top=False, bottom=True,
                           pad=label_pad, which='minor')

if minor_xticks:
    axes.xaxis.set_minor_locator(matplotlib.ticker.MultipleLocator(minor_xticks))
if xlim:
    axes.set_xlim(*xlim)
if ylim:
    axes.set_ylim(*ylim)


axes.set_ylabel(yname, fontsize = axes_name_size)


if yticks:
    axes.yaxis.set_ticks(yticks)

if yticks_label:
    axes.set_yticklabels(yticks_label)

# shape of major yticks
axes.yaxis.set_tick_params(direction='out', labelsize=20, length=6, width=2, right=False, left=True,
                           pad=label_pad, which='major')

# shape of minor yticks
axes.yaxis.set_tick_params(direction='out', labelsize=20, length=6, width=2, right=False, left=True,
                           pad=label_pad, which='minor')

if minor_yticks:
    axes.yaxis.set_minor_locator(matplotlib.ticker.MultipleLocator(minor_yticks))

plt.title(title)

plt.legend(prop={'size': legend_size}, loc='best', framealpha = 0.0, ncol=1)


plt.show()
plt.close()

# %% [code]
# Fig 4a

runs = glob.glob('./results/fig4a/*')
runs = sorted(runs, reverse=True)
run = runs[0]
run2 = runs[1]
print(run)
print(run2)

data = load_data(run + '/data.pickle')
data2 = load_data(run2 + '/data.pickle')

basic_colors = cm.get_cmap('tab10').colors

for (l_name, l_dat1), (_, l_dat2) in zip(data['cos'].items(), data2['cos'].items()):
    
    rcParams['axes.linewidth'] = 2
    rcParams['xtick.labelsize'] = 20
    rcParams['ytick.labelsize'] = 10
    rcParams['axes.titlesize'] = 25
    rcParams['axes.labelsize'] = 5
    rcParams['lines.markersize'] = 2
    rcParams['text.latex.preamble'] = r'\usepackage{amsmath, amssymb, amsfonts}'
    rcParams.update({'figure.autolayout': True})
    rc('text', usetex=True)           # r"$...$" for latex string


    plt.figure(figsize=(5,4))

    axes_name_size = 20
    legend_size = 13
    label_pad = 5
    title = l_name 
    

    xname = r'$|\beta|$'
    xlim = None 
    xticks = None
    xticks_label = None 
    minor_xticks = None   

    yname = r'Cosine similarity'
    ylim = (0, 7.5)
    yticks = [0, 2, 4, 6]
    yticks_label = [r'$0$', r'$1-10^{-2}$', r'$1-10^{-4}$', r'$1-10^{-6}$'] 
    minor_yticks = None 

    plt.axhline(y=7.2, color='#BBBBBB', linestyle=':', label='1 up to mach. prec.')
    
    for idx, (key, y) in enumerate(l_dat1.items()):
        z = - np.log10(1.0 - np.array(y))
        z = np.nan_to_num(z, nan=7.2, posinf=7.2)
        legend = f'N={key}'
        plt.plot(data['x'], z, label=legend, linewidth=2, color=basic_colors[idx])


    for idx, (key, y) in enumerate(l_dat2.items()):
        z = - np.log10(1.0 - np.array(y))
        z = np.nan_to_num(z, nan=7.2, posinf=7.2)
        plt.plot(data['x'], z, linewidth=2, color=basic_colors[idx], linestyle='--')

        
    axes = plt.gca()

#     axes.set_yscale('log')
    axes.set_xscale('log')
    
    axes.set_xlabel(xname, fontsize = axes_name_size)
    if xticks:
        axes.xaxis.set_ticks(xticks)

    if xticks_label:
        axes.set_xticklabels(xticks_label)
        
    axes.spines['right'].set_visible(False)
    axes.spines['top'].set_visible(False)

    
    # shape of major xticks
    axes.xaxis.set_tick_params(direction='out', labelsize=20, length=6, width=2, top=False, bottom=True,
                               pad=label_pad, which='major')


    # shape of minor xticks
    axes.xaxis.set_tick_params(direction='out', labelsize=20, length=6, width=2, top=False, bottom=True,
                               pad=label_pad, which='minor')

    if minor_xticks:
        axes.xaxis.set_minor_locator(matplotlib.ticker.MultipleLocator(minor_xticks))
    if xlim:
        axes.set_xlim(*xlim)
    if ylim:
        axes.set_ylim(*ylim)


    axes.set_ylabel(yname, fontsize = axes_name_size)


    if yticks:
        axes.yaxis.set_ticks(yticks)
    
    if yticks_label:
        axes.set_yticklabels(yticks_label)
    
    # shape of major yticks
    axes.yaxis.set_tick_params(direction='out', labelsize=20, length=6, width=2, right=False, left=True,
                               pad=label_pad, which='major')

    # shape of minor yticks
    axes.yaxis.set_tick_params(direction='out', labelsize=20, length=6, width=2, right=False, left=True,
                               pad=label_pad, which='minor')

    if minor_yticks:
        axes.yaxis.set_minor_locator(matplotlib.ticker.MultipleLocator(minor_yticks))

    plt.title(title)
    
    plt.legend(prop={'size': legend_size}, loc='best', framealpha = 0.0, ncol=2) # bbox_to_anchor=(0.1, 0.2), 


    plt.show()
    plt.close()  

# %% [code]
# Fig 4b

runs = glob.glob('./results/fig4b/*')
runs = sorted(runs, reverse=True)
run = runs[0]
print(run)


data = load_data(run + '/data.pickle')

main_color = '#BBBBBB'
basic_colors = [lighten_color(main_color, darkn) for darkn in [1.0, 2.0, 3.0, 1.8]]


rcParams['axes.linewidth'] = 2
rcParams['xtick.labelsize'] = 20
rcParams['ytick.labelsize'] = 10
rcParams['axes.titlesize'] = 25
rcParams['axes.labelsize'] = 5
rcParams['lines.markersize'] = 2
rcParams['text.latex.preamble'] = r'\usepackage{amsmath, amssymb, amsfonts}'
rcParams.update({'figure.autolayout': True})
rc('text', usetex=True)           # r"$...$" for latex string


plt.figure(figsize=(5,4))

axes_name_size = 20
legend_size = 13
label_pad = 5
title = ''

xname = r'Number of points $N$'
xlim = (1, 5)
xticks = [1, 2, 3, 4, 5]
xticks_label = None
minor_xticks = None

yname = r'Cosine similarity'
ylim = (1.5, 7.5)
yticks = [2, 4, 6]
yticks_label = [r'$1-10^{-2}$', r'$1-10^{-4}$', r'$1-10^{-6}$'] 
minor_yticks = None 

plt.axhline(y=7.2, color='#BBBBBB', linestyle=':', label='1 up to mach. prec.')

for idx, beta_idx in enumerate([0, 1, 2]):

    absc1 = []
    data_to_plot1 = []


    for n1, cosines1 in data['cos']['total'].items():

        absc1.append(int(n1))    
        data_to_plot1.append(np.nan_to_num(-np.log10(1-cosines1[beta_idx]), nan=7.2, posinf=7.2))

    plt.plot(absc1, data_to_plot1, label=r'$|\beta|=$'+f' {str(round(data["x"][beta_idx], 3))}',
             linewidth=2, color=basic_colors[idx])


axes = plt.gca()

# axes.set_yscale('log')


axes.set_xlabel(xname, fontsize = axes_name_size)
if xticks:
    axes.xaxis.set_ticks(xticks)

if xticks_label:
    axes.set_xticklabels(xticks_label)

axes.spines['right'].set_visible(False)
axes.spines['top'].set_visible(False)


# shape of major xticks
axes.xaxis.set_tick_params(direction='out', labelsize=20, length=6, width=2, top=False, bottom=True,
                           pad=label_pad, which='major')


# shape of minor xticks
axes.xaxis.set_tick_params(direction='out', labelsize=20, length=6, width=2, top=False, bottom=True,
                           pad=label_pad, which='minor')

if minor_xticks:
    axes.xaxis.set_minor_locator(matplotlib.ticker.MultipleLocator(minor_xticks))
if xlim:
    axes.set_xlim(*xlim)
if ylim:
    axes.set_ylim(*ylim)


axes.set_ylabel(yname, fontsize = axes_name_size)


if yticks:
    axes.yaxis.set_ticks(yticks)

if yticks_label:
    axes.set_yticklabels(yticks_label)

# shape of major yticks
axes.yaxis.set_tick_params(direction='out', labelsize=20, length=6, width=2, right=False, left=True,
                           pad=label_pad, which='major')

# shape of minor yticks
axes.yaxis.set_tick_params(direction='out', labelsize=20, length=6, width=2, right=False, left=True,
                           pad=label_pad, which='minor')

if minor_yticks:
    axes.yaxis.set_minor_locator(matplotlib.ticker.MultipleLocator(minor_yticks))

plt.title(title)

plt.legend(prop={'size': legend_size}, loc='best', framealpha = 0.0, ncol=1)


plt.show()
plt.close()

# %% [code]
# Fig 4c

rcParams['axes.linewidth'] = 2
rcParams['xtick.labelsize'] = 20
rcParams['ytick.labelsize'] = 20
rcParams['axes.titlesize'] = 40
rcParams['axes.labelsize'] = 25
rcParams['lines.markersize'] = 2
rcParams['text.latex.preamble'] = r'\usepackage{amsmath, amssymb, amsfonts}'
rcParams.update({'figure.autolayout': True})
rc('text', usetex=True)           # r"$...$" for latex string

basic_colors = cm.get_cmap('tab10').colors

run_types = ['non_holo_N2', 'holo_N2', 'holo_N4']

metrics = ['tr_acc']

data_to_plot = []
data_err = []

run_labels = ['Non holo.', 
              'Holo. (N=2)', 
              'Holo. (N=4)']


for run_type in run_types:
    
    runs = glob.glob(f'./results/fig4c/{run_type}/*')
    
    all_runs = [load_data(f'{run}/data.pickle') for run in runs]

    for metric in metrics:

        agg = np.array( [dictio[metric] for dictio in all_runs] )
        agg_max = np.max(agg, axis=1)
        av, std = np.mean(agg_max), np.std(agg_max)
        
        data_to_plot.append(1.0 - av)
        data_err.append(2*std)
        


legend_size = 12
label_pad = 5
title = ''

xname = ''
xlim = None   
xticks = np.arange(len(run_types))        
xticks_label = run_labels
minor_xticks = None   

yname = r'Training error'
ylim = (0.0, 0.2)
yticks = None
minor_yticks = None 


for metric in metrics:

    plt.figure(figsize=(5,4))

    absc = np.arange(len(run_types))
    plt.bar(absc, data_to_plot, yerr=data_err, color = [basic_colors[k] for k in [1,1,2]],
            align='center', alpha=0.5, ecolor='black', width=0.6)

    axes = plt.gca()

    axes.spines['right'].set_visible(False)
    axes.spines['top'].set_visible(False)
    
    #axes.set_xlabel(xname, fontsize = 20)
    if xticks is not None:
        axes.xaxis.set_ticks(xticks)
    if xticks_label:
        axes.set_xticklabels(xticks_label, rotation=20)

    

    
    # shape of major xticks
    axes.xaxis.set_tick_params(direction='out', labelsize=20, length=6, width=2, top=False, bottom=True,
                               pad=label_pad, which='major')


    # shape of minor xticks
    axes.xaxis.set_tick_params(direction='in', labelsize=35, length=6, width=3, top=True, bottom=True,
                               pad=label_pad, which='minor')

    if minor_xticks:
        axes.xaxis.set_minor_locator(matplotlib.ticker.MultipleLocator(minor_xticks))
    if xlim:
        axes.set_xlim(*xlim)
    if ylim:
        axes.set_ylim(*ylim)


    axes.set_ylabel(yname, fontsize = 20)
    if yticks:
        axes.yaxis.set_ticks(yticks)


    # shape of major yticks
    axes.yaxis.set_tick_params(direction='out', labelsize=20, length=6, width=2, right=False, left=True,
                               pad=label_pad, which='major')

    # shape of minor yticks
    axes.yaxis.set_tick_params(direction='in', labelsize=35, length=6, width=3, right=True, left=True,
                               pad=label_pad, which='minor')

    if minor_yticks:
        axes.yaxis.set_minor_locator(matplotlib.ticker.MultipleLocator(minor_yticks))

    plt.title(title)
    plt.show()

# %% [code]
# Table 1

settings = ['no_noise/classic_ep_1e-1', 'no_noise/classic_ep_4e-1', 'no_noise/hep', 'no_noise/continuous_hep',
            'noise/classic_ep_1e-1', 'noise/classic_ep_4e-1', 'noise/hep', 'noise/continuous_hep']

for setting in settings:
    runs = glob.glob(f'./results/table1/{setting}/*')

    metrics = ['tr_acc', 'val_acc']

    print('\n', setting, '\n')

    all_runs = [load_data(f'{run}/data.pickle') for run in runs]

    for metric in metrics:

        agg = np.array( [dictio[metric] for dictio in all_runs] )
        agg_min = np.min( 100*(1.0 - agg), axis=1)
        av, std = np.mean(agg_min), np.std(agg_min)

        print(f'{metric.replace("acc", "err")}:\t{round(av, 2)} +/- {round(std, 2)}')


# %% [code]
# Table 2

settings = ['bp_cif10', 'ep_cif10',
            'bp_cif100', 'ep_cif100',
            'bp_im32', 'ep_im32']

for setting in settings:
    runs = glob.glob(f'./results/table2/{setting}/*')

    metrics = ['val_acc', 'val_acc5']

    print('\n', setting, '\n')

    all_runs = [load_data(f'{run}/data.pickle') for run in runs]

    for metric in metrics:

        agg = np.array( [dictio[metric] for dictio in all_runs] )
        agg_max = np.max(agg, axis=1)
        av, std = np.mean(agg_max), np.std(agg_max)

        print(f'{metric}:\t{round(av, 3)} +/- {round(std, 3)}')


# %% [code]
