# Supplementary material
Source: ML conference proceedings conference paper supplement (https://proceedings.neurips.cc/paper_files/paper/2022/hash/545a114e655f9d25ba0d56ea9a01fc6e-Abstract.html)
Supplement: Supplementary file 1 [file 545a114e655f9d25ba0d56ea9a01fc6e-Supplemental-Conference.zip › revised_supplemental/code/results/fig2ac/2022-05-06_16-38-39_xp_mlp_toy_init5e-1_N24_mysig4_seed2_beta1e-3/log.txt]

-6.0
Time to free eq: 100

complex phase:

-3.312626361846924

Time to eq: 101
-6.0
-3.895369291305542

Time to eq: 101
-6.0
-3.89544415473938

Time to eq: 101
-6.0
-3.895522356033325

Time to eq: 101
-6.0
-3.895394802093506

Time to eq: 101
-6.0
-3.896331310272217

Time to eq: 101
-6.0
-3.8960020542144775

Time to eq: 101
-6.0
-3.896315574645996

Time to eq: 101
-6.0
-3.8965859413146973

Time to eq: 101
-6.0
-3.8970913887023926

Time to eq: 101
-6.0
-3.8970987796783447

Time to eq: 101
-6.0
-3.89703369140625

Time to eq: 101
-6.0
-3.897186517715454

Time to eq: 101
-6.0
-3.8971869945526123

Time to eq: 101
-6.0
-3.897062063217163

Time to eq: 101
-6.0
-3.8971009254455566

Time to eq: 101
-6.0
-3.897052049636841

Time to eq: 101
-6.0
-3.8965845108032227

Time to eq: 101
-6.0
-3.8962066173553467

Time to eq: 101
-6.0
-3.896231174468994

Time to eq: 101
-6.0
-3.8960964679718018

Time to eq: 101
-6.0
-3.8955440521240234

Time to eq: 101
-6.0
-3.8958077430725098

Time to eq: 101
-6.0
-3.8954784870147705

Time to eq: 101
-6.0
