# Supplementary material
Source: ML conference proceedings conference paper supplement (https://proceedings.neurips.cc/paper_files/paper/2022/hash/545a114e655f9d25ba0d56ea9a01fc6e-Abstract.html)
Supplement: Supplementary file 1 [file 545a114e655f9d25ba0d56ea9a01fc6e-Supplemental-Conference.zip › revised_supplemental/code/results/fig2ac/2022-05-06_16-44-31_xp_mlp_toy_init5e-1_N24_mysig4_seed2_beta1e-2/log.txt]

-6.0
Time to free eq: 100

complex phase:

-2.3084657192230225

Time to eq: 101
-6.0
-2.8874828815460205

Time to eq: 101
-6.0
-2.8880670070648193

Time to eq: 101
-5.992128
-2.8892245292663574

Time to eq: 101
-6.0
-2.89085054397583

Time to eq: 101
-6.0
-2.892862558364868

Time to eq: 101
-5.9937267
-2.8950862884521484

Time to eq: 101
-6.0
-2.897427797317505

Time to eq: 101
-6.0
-2.8997175693511963

Time to eq: 101
-6.0
-2.9017302989959717

Time to eq: 101
-6.0
-2.9034130573272705

Time to eq: 101
-6.0
-2.904613971710205

Time to eq: 101
-6.0
-2.9052343368530273

Time to eq: 101
-6.0
-2.9052348136901855

Time to eq: 101
-6.0
-2.90460205078125

Time to eq: 101
-6.0
-2.903414726257324

Time to eq: 101
-6.0
-2.901726484298706

Time to eq: 101
-6.0
-2.899670124053955

Time to eq: 101
-6.0
-2.897367477416992

Time to eq: 101
-6.0
-2.895052433013916

Time to eq: 101
-5.9937267
-2.892796277999878

Time to eq: 101
-6.0
-2.8907806873321533

Time to eq: 101
-6.0
-2.8891918659210205

Time to eq: 101
-6.0
-2.8880667686462402

Time to eq: 101
-6.0
