# Supplementary material
Source: ML conference proceedings conference paper supplement (https://proceedings.neurips.cc/paper_files/paper/2022/hash/545a114e655f9d25ba0d56ea9a01fc6e-Abstract.html)
Supplement: Supplementary file 1 [file 545a114e655f9d25ba0d56ea9a01fc6e-Supplemental-Conference.zip › revised_supplemental/code/results/fig2ac/2022-05-06_16-46-53_xp_mlp_toy_init5e-1_N24_mysig4_seed2_beta1e-1/log.txt]

-6.0
Time to free eq: 100

complex phase:

-1.2678231000900269

Time to eq: 101
-6.0
-1.8132977485656738

Time to eq: 101
-6.0
-1.8174022436141968

Time to eq: 101
-6.0
-1.8256622552871704

Time to eq: 101
-6.0
-1.838402509689331

Time to eq: 101
-5.9998064
-1.8556607961654663

Time to eq: 101
-6.0
-1.8768550157546997

Time to eq: 101
-6.0
-1.900665283203125

Time to eq: 101
-6.0
-1.9251341819763184

Time to eq: 101
-6.0
-1.9480462074279785

Time to eq: 101
-6.0
-1.9672709703445435

Time to eq: 101
-6.0
-1.981085181236267

Time to eq: 101
-6.0
-1.9883065223693848

Time to eq: 101
-6.0
-1.988338589668274

Time to eq: 101
-6.0
-1.9811729192733765

Time to eq: 101
-6.0
-1.967388391494751

Time to eq: 101
-6.0
-1.948144793510437

Time to eq: 101
-6.0
-1.925141453742981

Time to eq: 101
-5.999998
-1.9005132913589478

Time to eq: 101
-6.0
-1.8764803409576416

Time to eq: 101
-6.0
-1.8550724983215332

Time to eq: 101
-6.0
-1.837671160697937

Time to eq: 101
-6.0
-1.824946641921997

Time to eq: 101
-6.0
-1.8168749809265137

Time to eq: 101
-5.999229
