# Supplementary material
Source: ML conference proceedings conference paper supplement (https://proceedings.neurips.cc/paper_files/paper/2022/hash/545a114e655f9d25ba0d56ea9a01fc6e-Abstract.html)
Supplement: Supplementary file 1 [file 545a114e655f9d25ba0d56ea9a01fc6e-Supplemental-Conference.zip › revised_supplemental/code/results/fig2ac/2022-05-13_11-14-46_xp_mlp_toy_init5e-1_N24_mysig4_seed2_beta5e-1/log.txt]

-5.9107137
Time to free eq: 20

complex phase:

-0.4306350350379944

Time to eq: 50
-5.8137255
-0.9941949844360352

Time to eq: 50
-5.814357
-0.9382815957069397

Time to eq: 51
-5.801301
-0.8471824526786804

Time to eq: 37
-5.845999
-0.783424437046051

Time to eq: 21
-5.806306
-0.7779363989830017

Time to eq: 13
-5.968012
-0.8905527591705322

Time to eq: 11
-5.8943505
-1.0992567539215088

Time to eq: 11
-5.954562
-1.2910265922546387

Time to eq: 10
-5.8204966
-1.4336169958114624

Time to eq: 10
-5.90121
-1.5286240577697754

Time to eq: 10
-5.9360757
-1.5855906009674072

Time to eq: 9
-5.8236914
-1.612430453300476

Time to eq: 9
-5.849936
-1.613019585609436

Time to eq: 9
-5.84153
-1.5873793363571167

Time to eq: 9
-5.802479
-1.5316929817199707

Time to eq: 10
-5.9245768
-1.43825364112854

Time to eq: 10
-5.871834
-1.2986547946929932

Time to eq: 11
-5.965683
-1.1142854690551758

Time to eq: 11
-5.9325376
-0.9118717312812805

Time to eq: 12
-5.82037
-0.7649062275886536

Time to eq: 21
-5.8976717
-0.7647327780723572

Time to eq: 36
-5.846647
-0.8371779322624207

Time to eq: 50
-5.8268933
-0.9141549468040466

Time to eq: 50
-5.822768
