# Supplementary material
Source: ML conference proceedings conference paper supplement (https://proceedings.neurips.cc/paper_files/paper/2022/hash/545a114e655f9d25ba0d56ea9a01fc6e-Abstract.html)
Supplement: Supplementary file 1 [file 545a114e655f9d25ba0d56ea9a01fc6e-Supplemental-Conference.zip › revised_supplemental/code/results/fig3ab/2022-05-17_23-35-58_xp_mlp_2h_mnist_N10_T5_beta5e-2_noise0/log.txt]

Convergence for bptt grads:
1.5078654e-06
-1.9676609
-1.9679229
-1.9679229
-1.9679227
-1.9679227
-1.9679229
-1.9679224
-1.9679227
-1.9679229
-1.9679222
-1.9679227
-1.9679216
-1.9679229
-1.9679233
-1.9679222
-1.9679229
-1.9679229
-1.9679233
-1.967923
-1.9679227
-1.9679224
-1.967923
-1.9679233
-1.9679221
-1.9679229
-1.9679221
-1.967923
-1.9679222
-1.967923
-1.967923
-1.9679222
-1.9679224
-1.967923
-1.967923
-1.9679227
-1.9679229
-1.9679227
-1.9679224
-1.9679229
-1.9679229
Final cosine with grad:	 0.9964593052864075
Final dist with grad:	 0.14849257469177246
