# Supplementary material
Source: ML conference proceedings conference paper supplement (https://proceedings.neurips.cc/paper_files/paper/2022/hash/545a114e655f9d25ba0d56ea9a01fc6e-Abstract.html)
Supplement: Supplementary file 1 [file 545a114e655f9d25ba0d56ea9a01fc6e-Supplemental-Conference.zip › revised_supplemental/code/results/fig4a/2022-05-11_15-49-34_xpvgg6_max_mhtanh_im32/hyperparameters.json]

{
    "name": "xpvgg6_max_mhtanh_im32",
    "seed": 3,
    "model_type": "xent_p_cnn",
    "task": "imagenet32",
    "batch_size": 16,
    "archi": {
        "convlen": 6,
        "fclen": 1,
        "xent_phi/~/conv_1": {
            "channel": 128,
            "kernel": 3,
            "stride": 1,
            "pooling": "m",
            "Tmp": 1.0,
            "padding": "SAME"
        },
        "xent_phi/~/conv_2": {
            "channel": 128,
            "kernel": 3,
            "stride": 1,
            "pooling": "i",
            "padding": "SAME"
        },
        "xent_phi/~/conv_3": {
            "channel": 256,
            "kernel": 3,
            "stride": 1,
            "pooling": "m",
            "Tmp": 1.0,
            "padding": "SAME"
        },
        "xent_phi/~/conv_4": {
            "channel": 256,
            "kernel": 3,
            "stride": 1,
            "pooling": "i",
            "padding": "VALID"
        },
        "xent_phi/~/conv_5": {
            "channel": 512,
            "kernel": 3,
            "stride": 1,
            "pooling": "m",
            "Tmp": 1.0,
            "padding": "SAME"
        },
        "xent_phi/~/conv_6": {
            "channel": 512,
            "kernel": 3,
            "stride": 1,
            "pooling": "i",
            "padding": "VALID"
        },
        "xent_phi/~/fc_7": {
            "fc": 1000
        }
    },
    "activation": "my_hardtanh",
    "a": 1,
    "b": 2,
    "beta": 15.0,
    "T1": 100,
    "T2": 50,
    "N": [
        1,
        2
    ],
    "save": true,
    "parallel": false,
    "plot": false
}
