# Supplementary material
Source: ML conference proceedings conference paper supplement (https://proceedings.neurips.cc/paper_files/paper/2022/hash/545a114e655f9d25ba0d56ea9a01fc6e-Abstract.html)
Supplement: Supplementary file 1 [file 545a114e655f9d25ba0d56ea9a01fc6e-Supplemental-Conference.zip › revised_supplemental/code/results/fig4b/2022-05-16_14-22-26_xpvgg6_soft_mholo1_im32/log.txt]

Input :	(32, 32, 3)
Layer 1 :	(16, 16, 128)
Layer 2 :	(16, 16, 128)
Layer 3 :	(8, 8, 256)
Layer 4 :	(6, 6, 256)
Layer 5 :	(3, 3, 512)
Layer 6 :	(1, 1, 512)
