# Supplementary material
Source: ML conference proceedings conference paper supplement (https://proceedings.neurips.cc/paper_files/paper/2022/hash/545a114e655f9d25ba0d56ea9a01fc6e-Abstract.html)
Supplement: Supplementary file 1 [file 545a114e655f9d25ba0d56ea9a01fc6e-Supplemental-Conference.zip › revised_supplemental/code/results/fig4c/holo_N2/1/hyperparameters.json]

{
    "name": "xpvgg6_cif10_soft_ep2_mholo1_T260_beta1",
    "seed": 0,
    "model_type": "xent_p_cnn",
    "task": "cifar10",
    "algo": "EP",
    "batch_size": 128,
    "archi": {
        "convlen": 6,
        "fclen": 1,
        "xent_phi/~/conv_1": {
            "channel": 128,
            "kernel": 3,
            "stride": 1,
            "pooling": "s",
            "padding": "SAME",
            "lr": 0.05,
            "wd": 0.0005,
            "Tmp": 10.0
        },
        "xent_phi/~/conv_2": {
            "channel": 128,
            "kernel": 3,
            "stride": 1,
            "pooling": "i",
            "padding": "SAME",
            "lr": 0.04,
            "wd": 0.0005
        },
        "xent_phi/~/conv_3": {
            "channel": 256,
            "kernel": 3,
            "stride": 1,
            "pooling": "s",
            "padding": "SAME",
            "lr": 0.04,
            "wd": 0.0005,
            "Tmp": 10.0
        },
        "xent_phi/~/conv_4": {
            "channel": 256,
            "kernel": 3,
            "stride": 1,
            "pooling": "i",
            "padding": "VALID",
            "lr": 0.03,
            "wd": 0.0005
        },
        "xent_phi/~/conv_5": {
            "channel": 512,
            "kernel": 3,
            "stride": 1,
            "pooling": "s",
            "padding": "SAME",
            "lr": 0.03,
            "wd": 0.0005,
            "Tmp": 10.0
        },
        "xent_phi/~/conv_6": {
            "channel": 512,
            "kernel": 3,
            "stride": 1,
            "pooling": "i",
            "padding": "VALID",
            "lr": 0.02,
            "wd": 0.0005
        },
        "xent_phi/~/fc_7": {
            "fc": 10,
            "lr": 0.02,
            "wd": 0.001
        }
    },
    "activation": "my_holotanh",
    "a": 1,
    "epochs": 90,
    "beta": 1.0,
    "T1": 260,
    "T2": 60,
    "N": 2,
    "parallel": true,
    "save": true,
    "save_model": true,
    "save_checkpoint": true,
    "plot": false
}
