# Supplementary material
Source: ML conference proceedings conference paper supplement (https://proceedings.neurips.cc/paper_files/paper/2022/hash/545a114e655f9d25ba0d56ea9a01fc6e-Abstract.html)
Supplement: Supplementary file 1 [file 545a114e655f9d25ba0d56ea9a01fc6e-Supplemental-Conference.zip › revised_supplemental/code/results/fig4c/holo_N4/1/log.txt]

python train.py simus/ep/cnn/xpvgg6_cif10.json

Input   :	 (32, 32, 3)
Layer 1 :	 (16, 16, 128)
Layer 2 :	 (16, 16, 128)
Layer 3 :	 (8, 8, 256)
Layer 4 :	 (6, 6, 256)
Layer 5 :	 (3, 3, 512)
Layer 6 :	 (1, 1, 512)

Mean log L2 = -4.4682207107543945
Total dropped = 0
param norm = 37.1617431640625

Epoch 1 in 1228.91 sec
Train accuracy :	0.12	(6005/50000)		Train loss :	2.2743
Val accuracy   :	0.216	(2157/10000)		Val loss :	2.0866
Top-5 val acc  :	0.739	(7385/10000)


Mean log L2 = -4.571976661682129
Total dropped = 0
param norm = 37.48330307006836

Epoch 2 in 423.73 sec
Train accuracy :	0.269	(13443/50000)		Train loss :	1.9678
Val accuracy   :	0.337	(3365/10000)		Val loss :	1.8209
Top-5 val acc  :	0.859	(8589/10000)


Mean log L2 = -4.5378570556640625
Total dropped = 0
param norm = 37.890289306640625

Epoch 3 in 422.20 sec
Train accuracy :	0.342	(17106/50000)		Train loss :	1.7605
Val accuracy   :	0.366	(3659/10000)		Val loss :	1.7093
Top-5 val acc  :	0.89	(8905/10000)


Mean log L2 = -4.007534027099609
Total dropped = 0
param norm = 38.409027099609375

Epoch 4 in 424.91 sec
Train accuracy :	0.398	(19890/50000)		Train loss :	1.6245
Val accuracy   :	0.459	(4588/10000)		Val loss :	1.4936
Top-5 val acc  :	0.915	(9147/10000)


Mean log L2 = -3.658158540725708
Total dropped = 0
param norm = 38.92506790161133

Epoch 5 in 423.15 sec
Train accuracy :	0.445	(22252/50000)		Train loss :	1.5043
Val accuracy   :	0.494	(4945/10000)		Val loss :	1.3917
Top-5 val acc  :	0.93	(9304/10000)


Mean log L2 = -3.37799072265625
Total dropped = 0
param norm = 39.47831726074219

Epoch 6 in 423.78 sec
Train accuracy :	0.485	(24250/50000)		Train loss :	1.4012
Val accuracy   :	0.506	(5057/10000)		Val loss :	1.3456
Top-5 val acc  :	0.934	(9345/10000)


Mean log L2 = -3.1160073280334473
Total dropped = 0
param norm = 40.0989990234375

Epoch 7 in 422.95 sec
Train accuracy :	0.53	(26504/50000)		Train loss :	1.3045
Val accuracy   :	0.56	(5596/10000)		Val loss :	1.2117
Top-5 val acc  :	0.949	(9486/10000)


Mean log L2 = -2.9780185222625732
Total dropped = 0
param norm = 40.73257064819336

Epoch 8 in 423.46 sec
Train accuracy :	0.559	(27944/50000)		Train loss :	1.2286
Val accuracy   :	0.58	(5797/10000)		Val loss :	1.1811
Top-5 val acc  :	0.949	(9494/10000)


Mean log L2 = -2.8797402381896973
Total dropped = 0
param norm = 41.38308334350586

Epoch 9 in 423.19 sec
Train accuracy :	0.589	(29449/50000)		Train loss :	1.1558
Val accuracy   :	0.615	(6147/10000)		Val loss :	1.0964
Top-5 val acc  :	0.96	(9596/10000)


Mean log L2 = -2.917468786239624
Total dropped = 0
param norm = 42.010337829589844

Epoch 10 in 422.90 sec
Train accuracy :	0.618	(30921/50000)		Train loss :	1.0853
Val accuracy   :	0.62	(6196/10000)		Val loss :	1.0735
Top-5 val acc  :	0.959	(9593/10000)


Mean log L2 = -2.8333261013031006
Total dropped = 0
param norm = 42.64540100097656

Epoch 11 in 422.97 sec
Train accuracy :	0.637	(31858/50000)		Train loss :	1.034
Val accuracy   :	0.656	(6558/10000)		Val loss :	0.9918
Top-5 val acc  :	0.966	(9655/10000)


Mean log L2 = -2.7046549320220947
Total dropped = 0
param norm = 43.2510986328125

Epoch 12 in 425.86 sec
Train accuracy :	0.661	(33028/50000)		Train loss :	0.9726
Val accuracy   :	0.652	(6520/10000)		Val loss :	1.0189
Top-5 val acc  :	0.965	(9647/10000)


Mean log L2 = -2.674065351486206
Total dropped = 0
param norm = 43.84596633911133

Epoch 13 in 422.60 sec
Train accuracy :	0.678	(33889/50000)		Train loss :	0.9334
Val accuracy   :	0.677	(6774/10000)		Val loss :	0.9394
Top-5 val acc  :	0.968	(9684/10000)


Mean log L2 = -2.815753221511841
Total dropped = 0
param norm = 44.43379211425781

Epoch 14 in 423.15 sec
Train accuracy :	0.689	(34454/50000)		Train loss :	0.8988
Val accuracy   :	0.69	(6904/10000)		Val loss :	0.8877
Top-5 val acc  :	0.974	(9743/10000)


Mean log L2 = -2.919309377670288
Total dropped = 0
param norm = 44.944705963134766

Epoch 15 in 422.96 sec
Train accuracy :	0.703	(35150/50000)		Train loss :	0.8615
Val accuracy   :	0.691	(6909/10000)		Val loss :	0.8974
Top-5 val acc  :	0.975	(9748/10000)


Mean log L2 = -2.6538162231445312
Total dropped = 0
param norm = 45.48195266723633

Epoch 16 in 422.80 sec
Train accuracy :	0.719	(35968/50000)		Train loss :	0.8238
Val accuracy   :	0.703	(7025/10000)		Val loss :	0.8709
Top-5 val acc  :	0.971	(9713/10000)


Mean log L2 = -2.3613433837890625
Total dropped = 0
param norm = 46.01100540161133

Epoch 17 in 422.64 sec
Train accuracy :	0.729	(36433/50000)		Train loss :	0.7974
Val accuracy   :	0.723	(7225/10000)		Val loss :	0.8118
Top-5 val acc  :	0.977	(9773/10000)


Mean log L2 = -2.6924195289611816
Total dropped = 0
param norm = 46.49573516845703

Epoch 18 in 422.76 sec
Train accuracy :	0.74	(36981/50000)		Train loss :	0.7642
Val accuracy   :	0.733	(7327/10000)		Val loss :	0.7971
Top-5 val acc  :	0.978	(9783/10000)


Mean log L2 = -2.473706007003784
Total dropped = 0
param norm = 46.91938400268555

Epoch 19 in 422.30 sec
Train accuracy :	0.75	(37498/50000)		Train loss :	0.7373
Val accuracy   :	0.743	(7433/10000)		Val loss :	0.7698
Top-5 val acc  :	0.979	(9789/10000)


Mean log L2 = -2.489940643310547
Total dropped = 0
param norm = 47.37653350830078

Epoch 20 in 424.62 sec
Train accuracy :	0.755	(37749/50000)		Train loss :	0.7261
Val accuracy   :	0.747	(7473/10000)		Val loss :	0.7371
Top-5 val acc  :	0.979	(9791/10000)


Mean log L2 = -2.461698293685913
Total dropped = 0
param norm = 47.78537368774414

Epoch 21 in 426.56 sec
Train accuracy :	0.766	(38276/50000)		Train loss :	0.689
Val accuracy   :	0.733	(7331/10000)		Val loss :	0.7983
Top-5 val acc  :	0.979	(9788/10000)


Mean log L2 = -2.6304872035980225
Total dropped = 0
param norm = 48.15642547607422

Epoch 22 in 423.07 sec
Train accuracy :	0.774	(38696/50000)		Train loss :	0.6721
Val accuracy   :	0.761	(7608/10000)		Val loss :	0.6949
Top-5 val acc  :	0.982	(9816/10000)


Mean log L2 = -2.3891942501068115
Total dropped = 0
param norm = 48.49981689453125

Epoch 23 in 422.56 sec
Train accuracy :	0.781	(39066/50000)		Train loss :	0.649
Val accuracy   :	0.758	(7577/10000)		Val loss :	0.7062
Top-5 val acc  :	0.983	(9831/10000)


Mean log L2 = -2.550543785095215
Total dropped = 0
param norm = 48.810508728027344

Epoch 24 in 422.60 sec
Train accuracy :	0.788	(39378/50000)		Train loss :	0.6271
Val accuracy   :	0.776	(7762/10000)		Val loss :	0.6691
Top-5 val acc  :	0.982	(9818/10000)


Mean log L2 = -2.7158257961273193
Total dropped = 0
param norm = 49.129234313964844

Epoch 25 in 423.28 sec
Train accuracy :	0.795	(39755/50000)		Train loss :	0.6144
Val accuracy   :	0.768	(7685/10000)		Val loss :	0.6873
Top-5 val acc  :	0.982	(9821/10000)


Mean log L2 = -2.5774312019348145
Total dropped = 0
param norm = 49.42720031738281

Epoch 26 in 422.96 sec
Train accuracy :	0.802	(40109/50000)		Train loss :	0.5929
Val accuracy   :	0.781	(7814/10000)		Val loss :	0.6638
Top-5 val acc  :	0.985	(9847/10000)


Mean log L2 = -2.490405797958374
Total dropped = 0
param norm = 49.660194396972656

Epoch 27 in 424.78 sec
Train accuracy :	0.809	(40434/50000)		Train loss :	0.5723
Val accuracy   :	0.79	(7900/10000)		Val loss :	0.6361
Top-5 val acc  :	0.987	(9866/10000)


Mean log L2 = -2.6737771034240723
Total dropped = 0
param norm = 49.92976379394531

Epoch 28 in 422.74 sec
Train accuracy :	0.811	(40541/50000)		Train loss :	0.5651
Val accuracy   :	0.783	(7829/10000)		Val loss :	0.6538
Top-5 val acc  :	0.985	(9853/10000)


Mean log L2 = -2.2670974731445312
Total dropped = 0
param norm = 50.14926528930664

Epoch 29 in 422.48 sec
Train accuracy :	0.816	(40786/50000)		Train loss :	0.5501
Val accuracy   :	0.786	(7862/10000)		Val loss :	0.6371
Top-5 val acc  :	0.987	(9866/10000)


Mean log L2 = -2.288916826248169
Total dropped = 0
param norm = 50.390384674072266

Epoch 30 in 424.38 sec
Train accuracy :	0.82	(40995/50000)		Train loss :	0.5389
Val accuracy   :	0.796	(7960/10000)		Val loss :	0.6098
Top-5 val acc  :	0.986	(9857/10000)


Mean log L2 = -2.3904597759246826
Total dropped = 0
param norm = 50.601131439208984

Epoch 31 in 422.63 sec
Train accuracy :	0.825	(41237/50000)		Train loss :	0.5256
Val accuracy   :	0.798	(7980/10000)		Val loss :	0.6207
Top-5 val acc  :	0.986	(9863/10000)


Mean log L2 = -2.483454465866089
Total dropped = 0
param norm = 50.77558898925781

Epoch 32 in 422.59 sec
Train accuracy :	0.832	(41586/50000)		Train loss :	0.5048
Val accuracy   :	0.799	(7986/10000)		Val loss :	0.6027
Top-5 val acc  :	0.986	(9862/10000)


Mean log L2 = -2.5019702911376953
Total dropped = 0
param norm = 50.98966979980469

Epoch 33 in 422.46 sec
Train accuracy :	0.834	(41702/50000)		Train loss :	0.5003
Val accuracy   :	0.812	(8119/10000)		Val loss :	0.5723
Top-5 val acc  :	0.986	(9860/10000)


Mean log L2 = -2.397404193878174
Total dropped = 0
param norm = 51.14633560180664

Epoch 34 in 423.21 sec
Train accuracy :	0.839	(41958/50000)		Train loss :	0.4824
Val accuracy   :	0.813	(8131/10000)		Val loss :	0.5698
Top-5 val acc  :	0.988	(9876/10000)


Mean log L2 = -2.241145372390747
Total dropped = 0
param norm = 51.31137466430664

Epoch 35 in 422.93 sec
Train accuracy :	0.842	(42115/50000)		Train loss :	0.4702
Val accuracy   :	0.805	(8047/10000)		Val loss :	0.5897
Top-5 val acc  :	0.987	(9872/10000)


Mean log L2 = -2.480135679244995
Total dropped = 0
param norm = 51.46347427368164

Epoch 36 in 423.34 sec
Train accuracy :	0.849	(42472/50000)		Train loss :	0.4553
Val accuracy   :	0.819	(8194/10000)		Val loss :	0.5631
Top-5 val acc  :	0.988	(9882/10000)


Mean log L2 = -2.3472561836242676
Total dropped = 0
param norm = 51.57737731933594

Epoch 37 in 422.87 sec
Train accuracy :	0.854	(42682/50000)		Train loss :	0.4453
Val accuracy   :	0.819	(8187/10000)		Val loss :	0.563
Top-5 val acc  :	0.987	(9866/10000)


Mean log L2 = -2.356426954269409
Total dropped = 0
param norm = 51.7088737487793

Epoch 38 in 422.58 sec
Train accuracy :	0.851	(42567/50000)		Train loss :	0.4421
Val accuracy   :	0.807	(8068/10000)		Val loss :	0.581
Top-5 val acc  :	0.989	(9891/10000)


Mean log L2 = -2.3077380657196045
Total dropped = 0
param norm = 51.826194763183594

Epoch 39 in 422.69 sec
Train accuracy :	0.859	(42946/50000)		Train loss :	0.4241
Val accuracy   :	0.818	(8178/10000)		Val loss :	0.5501
Top-5 val acc  :	0.989	(9886/10000)


Mean log L2 = -2.4801697731018066
Total dropped = 0
param norm = 51.93651580810547

Epoch 40 in 422.69 sec
Train accuracy :	0.863	(43169/50000)		Train loss :	0.4125
Val accuracy   :	0.82	(8202/10000)		Val loss :	0.5624
Top-5 val acc  :	0.986	(9861/10000)


Mean log L2 = -2.218580722808838
Total dropped = 0
param norm = 52.043434143066406

Epoch 41 in 424.08 sec
Train accuracy :	0.865	(43273/50000)		Train loss :	0.4058
Val accuracy   :	0.819	(8192/10000)		Val loss :	0.5793
Top-5 val acc  :	0.988	(9875/10000)


Mean log L2 = -2.185842275619507
Total dropped = 0
param norm = 52.115230560302734

Epoch 42 in 422.45 sec
Train accuracy :	0.868	(43393/50000)		Train loss :	0.396
Val accuracy   :	0.829	(8292/10000)		Val loss :	0.5436
Top-5 val acc  :	0.986	(9861/10000)


Mean log L2 = -2.286393880844116
Total dropped = 0
param norm = 52.16423797607422

Epoch 43 in 422.96 sec
Train accuracy :	0.874	(43715/50000)		Train loss :	0.3781
Val accuracy   :	0.833	(8330/10000)		Val loss :	0.5156
Top-5 val acc  :	0.99	(9895/10000)


Mean log L2 = -2.226773977279663
Total dropped = 0
param norm = 52.21738815307617

Epoch 44 in 426.16 sec
Train accuracy :	0.876	(43797/50000)		Train loss :	0.3732
Val accuracy   :	0.818	(8183/10000)		Val loss :	0.5873
Top-5 val acc  :	0.989	(9887/10000)


Mean log L2 = -2.317915439605713
Total dropped = 0
param norm = 52.27487564086914

Epoch 45 in 422.72 sec
Train accuracy :	0.879	(43927/50000)		Train loss :	0.3675
Val accuracy   :	0.831	(8312/10000)		Val loss :	0.54
Top-5 val acc  :	0.99	(9896/10000)


Mean log L2 = -2.359766721725464
Total dropped = 0
param norm = 52.32524871826172

Epoch 46 in 422.70 sec
Train accuracy :	0.883	(44152/50000)		Train loss :	0.3519
Val accuracy   :	0.832	(8318/10000)		Val loss :	0.5358
Top-5 val acc  :	0.989	(9891/10000)


Mean log L2 = -2.357436418533325
Total dropped = 0
param norm = 52.346702575683594

Epoch 47 in 422.71 sec
Train accuracy :	0.886	(44325/50000)		Train loss :	0.3418
Val accuracy   :	0.815	(8154/10000)		Val loss :	0.5891
Top-5 val acc  :	0.989	(9886/10000)


Mean log L2 = -2.3863189220428467
Total dropped = 0
param norm = 52.37589645385742

Epoch 48 in 423.14 sec
Train accuracy :	0.89	(44509/50000)		Train loss :	0.3329
Val accuracy   :	0.828	(8280/10000)		Val loss :	0.5472
Top-5 val acc  :	0.988	(9883/10000)


Mean log L2 = -2.1970856189727783
Total dropped = 0
param norm = 52.414581298828125

Epoch 49 in 423.34 sec
Train accuracy :	0.89	(44522/50000)		Train loss :	0.3285
Val accuracy   :	0.83	(8300/10000)		Val loss :	0.5477
Top-5 val acc  :	0.988	(9882/10000)


Mean log L2 = -2.401085615158081
Total dropped = 0
param norm = 52.44411087036133

Epoch 50 in 423.13 sec
Train accuracy :	0.893	(44673/50000)		Train loss :	0.3213
Val accuracy   :	0.834	(8340/10000)		Val loss :	0.5208
Top-5 val acc  :	0.989	(9887/10000)


Mean log L2 = -2.4375741481781006
Total dropped = 0
param norm = 52.46628189086914

Epoch 51 in 425.42 sec
Train accuracy :	0.897	(44855/50000)		Train loss :	0.3117
Val accuracy   :	0.84	(8403/10000)		Val loss :	0.5241
Top-5 val acc  :	0.99	(9901/10000)


Mean log L2 = -2.409558057785034
Total dropped = 0
param norm = 52.47806930541992

Epoch 52 in 423.15 sec
Train accuracy :	0.899	(44941/50000)		Train loss :	0.3059
Val accuracy   :	0.837	(8365/10000)		Val loss :	0.5488
Top-5 val acc  :	0.989	(9887/10000)


Mean log L2 = -2.3078434467315674
Total dropped = 0
param norm = 52.48553466796875

Epoch 53 in 424.98 sec
Train accuracy :	0.904	(45193/50000)		Train loss :	0.2915
Val accuracy   :	0.836	(8356/10000)		Val loss :	0.5369
Top-5 val acc  :	0.99	(9897/10000)


Mean log L2 = -2.2841920852661133
Total dropped = 0
param norm = 52.5120964050293

Epoch 54 in 422.69 sec
Train accuracy :	0.906	(45287/50000)		Train loss :	0.2898
Val accuracy   :	0.842	(8423/10000)		Val loss :	0.542
Top-5 val acc  :	0.989	(9892/10000)


Mean log L2 = -2.34991717338562
Total dropped = 0
param norm = 52.50788879394531

Epoch 55 in 422.84 sec
Train accuracy :	0.909	(45441/50000)		Train loss :	0.2798
Val accuracy   :	0.835	(8353/10000)		Val loss :	0.5439
Top-5 val acc  :	0.989	(9886/10000)


Mean log L2 = -2.238797426223755
Total dropped = 0
param norm = 52.512001037597656

Epoch 56 in 422.96 sec
Train accuracy :	0.911	(45552/50000)		Train loss :	0.273
Val accuracy   :	0.842	(8420/10000)		Val loss :	0.5116
Top-5 val acc  :	0.99	(9895/10000)


Mean log L2 = -2.300720691680908
Total dropped = 0
param norm = 52.49824523925781

Epoch 57 in 423.32 sec
Train accuracy :	0.915	(45730/50000)		Train loss :	0.2612
Val accuracy   :	0.845	(8451/10000)		Val loss :	0.5212
Top-5 val acc  :	0.988	(9882/10000)


Mean log L2 = -2.436945676803589
Total dropped = 0
param norm = 52.48483657836914

Epoch 58 in 422.39 sec
Train accuracy :	0.915	(45746/50000)		Train loss :	0.2578
Val accuracy   :	0.842	(8422/10000)		Val loss :	0.5492
Top-5 val acc  :	0.988	(9881/10000)


Mean log L2 = -2.3305561542510986
Total dropped = 0
param norm = 52.47178649902344

Epoch 59 in 422.22 sec
Train accuracy :	0.918	(45879/50000)		Train loss :	0.2493
Val accuracy   :	0.844	(8435/10000)		Val loss :	0.5195
Top-5 val acc  :	0.99	(9896/10000)


Mean log L2 = -2.1536881923675537
Total dropped = 0
param norm = 52.46126174926758

Epoch 60 in 422.43 sec
Train accuracy :	0.921	(46068/50000)		Train loss :	0.2428
Val accuracy   :	0.84	(8403/10000)		Val loss :	0.5555
Top-5 val acc  :	0.989	(9892/10000)


Mean log L2 = -2.203524351119995
Total dropped = 0
param norm = 52.43747329711914

Epoch 61 in 422.47 sec
Train accuracy :	0.926	(46280/50000)		Train loss :	0.2301
Val accuracy   :	0.846	(8462/10000)		Val loss :	0.5326
Top-5 val acc  :	0.989	(9888/10000)


Mean log L2 = -2.202197790145874
Total dropped = 0
param norm = 52.42339324951172

Epoch 62 in 422.69 sec
Train accuracy :	0.925	(46228/50000)		Train loss :	0.2334
Val accuracy   :	0.847	(8468/10000)		Val loss :	0.5238
Top-5 val acc  :	0.99	(9895/10000)


Mean log L2 = -2.2973973751068115
Total dropped = 0
param norm = 52.40753173828125

Epoch 63 in 424.81 sec
Train accuracy :	0.928	(46402/50000)		Train loss :	0.223
Val accuracy   :	0.845	(8451/10000)		Val loss :	0.5335
Top-5 val acc  :	0.99	(9902/10000)


Mean log L2 = -2.3990848064422607
Total dropped = 0
param norm = 52.38721466064453

Epoch 64 in 424.99 sec
Train accuracy :	0.928	(46393/50000)		Train loss :	0.2184
Val accuracy   :	0.844	(8442/10000)		Val loss :	0.5321
Top-5 val acc  :	0.989	(9889/10000)


Mean log L2 = -2.245626449584961
Total dropped = 0
param norm = 52.37649917602539

Epoch 65 in 424.96 sec
Train accuracy :	0.933	(46662/50000)		Train loss :	0.2092
Val accuracy   :	0.848	(8478/10000)		Val loss :	0.5474
Top-5 val acc  :	0.99	(9898/10000)


Mean log L2 = -2.441690444946289
Total dropped = 0
param norm = 52.352210998535156

Epoch 66 in 425.13 sec
Train accuracy :	0.933	(46662/50000)		Train loss :	0.2039
Val accuracy   :	0.849	(8493/10000)		Val loss :	0.5398
Top-5 val acc  :	0.99	(9897/10000)


Mean log L2 = -2.3023316860198975
Total dropped = 0
param norm = 52.33095932006836

Epoch 67 in 425.22 sec
Train accuracy :	0.936	(46792/50000)		Train loss :	0.1996
Val accuracy   :	0.851	(8511/10000)		Val loss :	0.5328
Top-5 val acc  :	0.988	(9884/10000)


Mean log L2 = -2.365813970565796
Total dropped = 0
param norm = 52.310733795166016

Epoch 68 in 423.63 sec
Train accuracy :	0.939	(46942/50000)		Train loss :	0.1906
Val accuracy   :	0.85	(8496/10000)		Val loss :	0.5523
Top-5 val acc  :	0.989	(9888/10000)


Mean log L2 = -2.5288474559783936
Total dropped = 0
param norm = 52.292667388916016

Epoch 69 in 422.54 sec
Train accuracy :	0.942	(47079/50000)		Train loss :	0.1822
Val accuracy   :	0.851	(8513/10000)		Val loss :	0.5436
Top-5 val acc  :	0.989	(9894/10000)


Mean log L2 = -2.5089242458343506
Total dropped = 0
param norm = 52.263057708740234

Epoch 70 in 422.94 sec
Train accuracy :	0.94	(46996/50000)		Train loss :	0.1857
Val accuracy   :	0.854	(8544/10000)		Val loss :	0.5154
Top-5 val acc  :	0.99	(9903/10000)


Mean log L2 = -2.3706088066101074
Total dropped = 0
param norm = 52.237884521484375

Epoch 71 in 422.49 sec
Train accuracy :	0.943	(47154/50000)		Train loss :	0.1786
Val accuracy   :	0.855	(8553/10000)		Val loss :	0.5386
Top-5 val acc  :	0.988	(9882/10000)


Mean log L2 = -2.258936882019043
Total dropped = 0
param norm = 52.215858459472656

Epoch 72 in 422.67 sec
Train accuracy :	0.946	(47292/50000)		Train loss :	0.1716
Val accuracy   :	0.851	(8508/10000)		Val loss :	0.5319
Top-5 val acc  :	0.989	(9888/10000)


Mean log L2 = -2.391193151473999
Total dropped = 0
param norm = 52.200889587402344

Epoch 73 in 422.81 sec
Train accuracy :	0.946	(47322/50000)		Train loss :	0.1687
Val accuracy   :	0.854	(8535/10000)		Val loss :	0.5497
Top-5 val acc  :	0.99	(9898/10000)


Mean log L2 = -2.2707645893096924
Total dropped = 0
param norm = 52.1884651184082

Epoch 74 in 422.93 sec
Train accuracy :	0.947	(47362/50000)		Train loss :	0.1666
Val accuracy   :	0.852	(8518/10000)		Val loss :	0.5836
Top-5 val acc  :	0.989	(9888/10000)


Mean log L2 = -2.227626085281372
Total dropped = 0
param norm = 52.16606903076172

Epoch 75 in 422.64 sec
Train accuracy :	0.95	(47485/50000)		Train loss :	0.161
Val accuracy   :	0.852	(8517/10000)		Val loss :	0.5535
Top-5 val acc  :	0.989	(9888/10000)


Mean log L2 = -2.390423536300659
Total dropped = 0
param norm = 52.1532096862793

Epoch 76 in 423.19 sec
Train accuracy :	0.95	(47487/50000)		Train loss :	0.1587
Val accuracy   :	0.854	(8543/10000)		Val loss :	0.5658
Top-5 val acc  :	0.988	(9883/10000)


Mean log L2 = -2.4992780685424805
Total dropped = 0
param norm = 52.13682174682617

Epoch 77 in 423.27 sec
Train accuracy :	0.952	(47601/50000)		Train loss :	0.1526
Val accuracy   :	0.851	(8514/10000)		Val loss :	0.5798
Top-5 val acc  :	0.988	(9883/10000)


Mean log L2 = -2.3616161346435547
Total dropped = 0
param norm = 52.12266159057617

Epoch 78 in 422.15 sec
Train accuracy :	0.952	(47603/50000)		Train loss :	0.1505
Val accuracy   :	0.856	(8558/10000)		Val loss :	0.5675
Top-5 val acc  :	0.989	(9888/10000)


Mean log L2 = -2.354766845703125
Total dropped = 0
param norm = 52.108158111572266

Epoch 79 in 422.34 sec
Train accuracy :	0.953	(47668/50000)		Train loss :	0.1489
Val accuracy   :	0.857	(8572/10000)		Val loss :	0.5515
Top-5 val acc  :	0.989	(9890/10000)


Mean log L2 = -2.3455352783203125
Total dropped = 0
param norm = 52.09746170043945

Epoch 80 in 422.42 sec
Train accuracy :	0.954	(47722/50000)		Train loss :	0.1465
Val accuracy   :	0.854	(8538/10000)		Val loss :	0.5575
Top-5 val acc  :	0.988	(9883/10000)


Mean log L2 = -2.4349429607391357
Total dropped = 0
param norm = 52.08803176879883

Epoch 81 in 422.31 sec
Train accuracy :	0.954	(47703/50000)		Train loss :	0.1459
Val accuracy   :	0.855	(8547/10000)		Val loss :	0.5626
Top-5 val acc  :	0.988	(9883/10000)


Mean log L2 = -2.4403469562530518
Total dropped = 0
param norm = 52.07939910888672

Epoch 82 in 422.59 sec
Train accuracy :	0.954	(47713/50000)		Train loss :	0.1465
Val accuracy   :	0.857	(8565/10000)		Val loss :	0.5592
Top-5 val acc  :	0.988	(9883/10000)


Mean log L2 = -2.4049084186553955
Total dropped = 0
param norm = 52.072269439697266

Epoch 83 in 422.62 sec
Train accuracy :	0.956	(47784/50000)		Train loss :	0.1417
Val accuracy   :	0.857	(8565/10000)		Val loss :	0.5568
Top-5 val acc  :	0.989	(9890/10000)


Mean log L2 = -2.338804244995117
Total dropped = 0
param norm = 52.06767272949219

Epoch 84 in 422.58 sec
Train accuracy :	0.957	(47842/50000)		Train loss :	0.1398
Val accuracy   :	0.855	(8548/10000)		Val loss :	0.5684
Top-5 val acc  :	0.989	(9885/10000)


Mean log L2 = -2.455183982849121
Total dropped = 0
param norm = 52.06391143798828

Epoch 85 in 422.86 sec
Train accuracy :	0.959	(47925/50000)		Train loss :	0.1356
Val accuracy   :	0.856	(8562/10000)		Val loss :	0.5656
Top-5 val acc  :	0.988	(9882/10000)


Mean log L2 = -2.344606637954712
Total dropped = 0
param norm = 52.0598258972168

Epoch 86 in 422.43 sec
Train accuracy :	0.957	(47874/50000)		Train loss :	0.1376
Val accuracy   :	0.856	(8558/10000)		Val loss :	0.5666
Top-5 val acc  :	0.988	(9883/10000)


Mean log L2 = -2.324232816696167
Total dropped = 0
param norm = 52.05748748779297

Epoch 87 in 422.69 sec
Train accuracy :	0.959	(47947/50000)		Train loss :	0.1328
Val accuracy   :	0.857	(8565/10000)		Val loss :	0.5732
Top-5 val acc  :	0.988	(9882/10000)


Mean log L2 = -2.406121253967285
Total dropped = 0
param norm = 52.05535888671875

Epoch 88 in 422.46 sec
Train accuracy :	0.959	(47959/50000)		Train loss :	0.1348
Val accuracy   :	0.856	(8561/10000)		Val loss :	0.5704
Top-5 val acc  :	0.988	(9882/10000)


Mean log L2 = -2.4616219997406006
Total dropped = 0
param norm = 52.054134368896484

Epoch 89 in 422.51 sec
Train accuracy :	0.959	(47958/50000)		Train loss :	0.1313
Val accuracy   :	0.856	(8563/10000)		Val loss :	0.5715
Top-5 val acc  :	0.988	(9879/10000)


Mean log L2 = -2.5244431495666504
Total dropped = 0
param norm = 52.05385208129883

Epoch 90 in 422.95 sec
Train accuracy :	0.959	(47958/50000)		Train loss :	0.1324
Val accuracy   :	0.857	(8566/10000)		Val loss :	0.5704
Top-5 val acc  :	0.988	(9880/10000)
