# Supplementary material
Source: ML conference proceedings conference paper supplement (https://proceedings.neurips.cc/paper_files/paper/2022/hash/545a114e655f9d25ba0d56ea9a01fc6e-Abstract.html)
Supplement: Supplementary file 1 [file 545a114e655f9d25ba0d56ea9a01fc6e-Supplemental-Conference.zip › revised_supplemental/code/results/fig4c/holo_N4/2/log.txt]

python train.py simus/ep/cnn/xpvgg6_cif10.json

Input   :	 (32, 32, 3)
Layer 1 :	 (16, 16, 128)
Layer 2 :	 (16, 16, 128)
Layer 3 :	 (8, 8, 256)
Layer 4 :	 (6, 6, 256)
Layer 5 :	 (3, 3, 512)
Layer 6 :	 (1, 1, 512)

Mean log L2 = -4.234975337982178
Total dropped = 0
param norm = 37.179771423339844

Epoch 1 in 1235.49 sec
Train accuracy :	0.107	(5354/50000)		Train loss :	2.3022
Val accuracy   :	0.169	(1693/10000)		Val loss :	2.2037
Top-5 val acc  :	0.666	(6660/10000)


Mean log L2 = -4.611477851867676
Total dropped = 0
param norm = 37.32614517211914

Epoch 2 in 424.40 sec
Train accuracy :	0.23	(11522/50000)		Train loss :	2.0529
Val accuracy   :	0.261	(2609/10000)		Val loss :	1.9767
Top-5 val acc  :	0.784	(7836/10000)


Mean log L2 = -3.8236985206604004
Total dropped = 0
param norm = 37.749691009521484

Epoch 3 in 422.41 sec
Train accuracy :	0.324	(16185/50000)		Train loss :	1.8289
Val accuracy   :	0.378	(3783/10000)		Val loss :	1.7
Top-5 val acc  :	0.881	(8815/10000)


Mean log L2 = -4.181027412414551
Total dropped = 0
param norm = 38.215415954589844

Epoch 4 in 424.50 sec
Train accuracy :	0.38	(18978/50000)		Train loss :	1.6826
Val accuracy   :	0.436	(4356/10000)		Val loss :	1.5433
Top-5 val acc  :	0.912	(9116/10000)


Mean log L2 = -3.909090518951416
Total dropped = 0
param norm = 38.69218826293945

Epoch 5 in 422.80 sec
Train accuracy :	0.419	(20942/50000)		Train loss :	1.5689
Val accuracy   :	0.455	(4553/10000)		Val loss :	1.4772
Top-5 val acc  :	0.922	(9221/10000)


Mean log L2 = -3.4441659450531006
Total dropped = 0
param norm = 39.19568634033203

Epoch 6 in 423.69 sec
Train accuracy :	0.465	(23231/50000)		Train loss :	1.4605
Val accuracy   :	0.503	(5027/10000)		Val loss :	1.3752
Top-5 val acc  :	0.932	(9316/10000)


Mean log L2 = -2.9132721424102783
Total dropped = 0
param norm = 39.794410705566406

Epoch 7 in 423.33 sec
Train accuracy :	0.499	(24944/50000)		Train loss :	1.3713
Val accuracy   :	0.539	(5386/10000)		Val loss :	1.2737
Top-5 val acc  :	0.943	(9429/10000)


Mean log L2 = -2.943092107772827
Total dropped = 0
param norm = 40.36097717285156

Epoch 8 in 423.33 sec
Train accuracy :	0.536	(26783/50000)		Train loss :	1.2822
Val accuracy   :	0.547	(5472/10000)		Val loss :	1.2727
Top-5 val acc  :	0.944	(9439/10000)


Mean log L2 = -2.9350228309631348
Total dropped = 0
param norm = 41.01871109008789

Epoch 9 in 423.16 sec
Train accuracy :	0.571	(28573/50000)		Train loss :	1.1973
Val accuracy   :	0.579	(5790/10000)		Val loss :	1.1615
Top-5 val acc  :	0.956	(9563/10000)


Mean log L2 = -2.8994553089141846
Total dropped = 0
param norm = 41.62569808959961

Epoch 10 in 423.09 sec
Train accuracy :	0.596	(29786/50000)		Train loss :	1.1372
Val accuracy   :	0.609	(6088/10000)		Val loss :	1.1243
Top-5 val acc  :	0.956	(9564/10000)


Mean log L2 = -2.9027442932128906
Total dropped = 0
param norm = 42.22303771972656

Epoch 11 in 423.16 sec
Train accuracy :	0.622	(31077/50000)		Train loss :	1.073
Val accuracy   :	0.646	(6465/10000)		Val loss :	1.0137
Top-5 val acc  :	0.966	(9660/10000)


Mean log L2 = -3.0186169147491455
Total dropped = 0
param norm = 42.83705520629883

Epoch 12 in 425.63 sec
Train accuracy :	0.646	(32304/50000)		Train loss :	1.013
Val accuracy   :	0.669	(6693/10000)		Val loss :	0.9503
Top-5 val acc  :	0.97	(9695/10000)


Mean log L2 = -3.0182321071624756
Total dropped = 0
param norm = 43.47197723388672

Epoch 13 in 422.66 sec
Train accuracy :	0.663	(33166/50000)		Train loss :	0.9635
Val accuracy   :	0.679	(6794/10000)		Val loss :	0.9137
Top-5 val acc  :	0.97	(9702/10000)


Mean log L2 = -2.9364871978759766
Total dropped = 0
param norm = 44.10502243041992

Epoch 14 in 423.24 sec
Train accuracy :	0.679	(33947/50000)		Train loss :	0.9287
Val accuracy   :	0.699	(6986/10000)		Val loss :	0.8784
Top-5 val acc  :	0.971	(9713/10000)


Mean log L2 = -2.867565631866455
Total dropped = 0
param norm = 44.63442611694336

Epoch 15 in 423.44 sec
Train accuracy :	0.699	(34955/50000)		Train loss :	0.8787
Val accuracy   :	0.7	(7001/10000)		Val loss :	0.8754
Top-5 val acc  :	0.972	(9720/10000)


Mean log L2 = -2.8302299976348877
Total dropped = 0
param norm = 45.126434326171875

Epoch 16 in 422.64 sec
Train accuracy :	0.713	(35644/50000)		Train loss :	0.8378
Val accuracy   :	0.705	(7049/10000)		Val loss :	0.848
Top-5 val acc  :	0.974	(9739/10000)


Mean log L2 = -2.831475019454956
Total dropped = 0
param norm = 45.591835021972656

Epoch 17 in 422.57 sec
Train accuracy :	0.726	(36276/50000)		Train loss :	0.8012
Val accuracy   :	0.718	(7177/10000)		Val loss :	0.8307
Top-5 val acc  :	0.977	(9772/10000)


Mean log L2 = -2.5494892597198486
Total dropped = 0
param norm = 46.059818267822266

Epoch 18 in 422.75 sec
Train accuracy :	0.733	(36665/50000)		Train loss :	0.7777
Val accuracy   :	0.736	(7361/10000)		Val loss :	0.7714
Top-5 val acc  :	0.98	(9803/10000)


Mean log L2 = -2.929258346557617
Total dropped = 0
param norm = 46.49793243408203

Epoch 19 in 422.53 sec
Train accuracy :	0.747	(37347/50000)		Train loss :	0.7459
Val accuracy   :	0.74	(7403/10000)		Val loss :	0.7807
Top-5 val acc  :	0.977	(9772/10000)


Mean log L2 = -2.832455635070801
Total dropped = 0
param norm = 46.91480255126953

Epoch 20 in 424.13 sec
Train accuracy :	0.754	(37709/50000)		Train loss :	0.7272
Val accuracy   :	0.742	(7423/10000)		Val loss :	0.7436
Top-5 val acc  :	0.976	(9762/10000)


Mean log L2 = -2.686981678009033
Total dropped = 0
param norm = 47.29385757446289

Epoch 21 in 425.67 sec
Train accuracy :	0.764	(38194/50000)		Train loss :	0.6968
Val accuracy   :	0.756	(7562/10000)		Val loss :	0.7192
Top-5 val acc  :	0.982	(9821/10000)


Mean log L2 = -2.633120059967041
Total dropped = 0
param norm = 47.652732849121094

Epoch 22 in 422.96 sec
Train accuracy :	0.771	(38556/50000)		Train loss :	0.673
Val accuracy   :	0.762	(7621/10000)		Val loss :	0.6953
Top-5 val acc  :	0.984	(9836/10000)


Mean log L2 = -2.5176045894622803
Total dropped = 0
param norm = 47.99467468261719

Epoch 23 in 422.62 sec
Train accuracy :	0.784	(39221/50000)		Train loss :	0.6416
Val accuracy   :	0.775	(7747/10000)		Val loss :	0.6642
Top-5 val acc  :	0.983	(9832/10000)


Mean log L2 = -2.7054641246795654
Total dropped = 0
param norm = 48.29066467285156

Epoch 24 in 422.89 sec
Train accuracy :	0.787	(39370/50000)		Train loss :	0.6336
Val accuracy   :	0.775	(7755/10000)		Val loss :	0.6659
Top-5 val acc  :	0.984	(9837/10000)


Mean log L2 = -2.2153501510620117
Total dropped = 0
param norm = 48.57571029663086

Epoch 25 in 422.90 sec
Train accuracy :	0.794	(39724/50000)		Train loss :	0.6047
Val accuracy   :	0.773	(7726/10000)		Val loss :	0.698
Top-5 val acc  :	0.982	(9817/10000)


Mean log L2 = -2.6070384979248047
Total dropped = 0
param norm = 48.84886932373047

Epoch 26 in 422.67 sec
Train accuracy :	0.8	(40005/50000)		Train loss :	0.5947
Val accuracy   :	0.78	(7801/10000)		Val loss :	0.6479
Top-5 val acc  :	0.985	(9847/10000)


Mean log L2 = -2.4049041271209717
Total dropped = 0
param norm = 49.13365173339844

Epoch 27 in 424.95 sec
Train accuracy :	0.805	(40248/50000)		Train loss :	0.5783
Val accuracy   :	0.779	(7789/10000)		Val loss :	0.6692
Top-5 val acc  :	0.983	(9832/10000)


Mean log L2 = -2.482778310775757
Total dropped = 0
param norm = 49.376304626464844

Epoch 28 in 422.77 sec
Train accuracy :	0.813	(40631/50000)		Train loss :	0.5634
Val accuracy   :	0.801	(8008/10000)		Val loss :	0.606
Top-5 val acc  :	0.986	(9857/10000)


Mean log L2 = -2.6112234592437744
Total dropped = 0
param norm = 49.562538146972656

Epoch 29 in 422.66 sec
Train accuracy :	0.818	(40911/50000)		Train loss :	0.5453
Val accuracy   :	0.799	(7987/10000)		Val loss :	0.5949
Top-5 val acc  :	0.986	(9864/10000)


Mean log L2 = -2.4313032627105713
Total dropped = 0
param norm = 49.789241790771484

Epoch 30 in 423.99 sec
Train accuracy :	0.822	(41120/50000)		Train loss :	0.5288
Val accuracy   :	0.813	(8134/10000)		Val loss :	0.5686
Top-5 val acc  :	0.988	(9876/10000)


Mean log L2 = -2.3537423610687256
Total dropped = 0
param norm = 49.96149444580078

Epoch 31 in 422.70 sec
Train accuracy :	0.829	(41443/50000)		Train loss :	0.5143
Val accuracy   :	0.79	(7897/10000)		Val loss :	0.6304
Top-5 val acc  :	0.985	(9852/10000)


Mean log L2 = -2.5798559188842773
Total dropped = 0
param norm = 50.12792205810547

Epoch 32 in 422.66 sec
Train accuracy :	0.83	(41495/50000)		Train loss :	0.5071
Val accuracy   :	0.809	(8088/10000)		Val loss :	0.576
Top-5 val acc  :	0.987	(9871/10000)


Mean log L2 = -2.511202573776245
Total dropped = 0
param norm = 50.319114685058594

Epoch 33 in 422.64 sec
Train accuracy :	0.84	(41979/50000)		Train loss :	0.4875
Val accuracy   :	0.81	(8105/10000)		Val loss :	0.5674
Top-5 val acc  :	0.986	(9858/10000)


Mean log L2 = -2.4890706539154053
Total dropped = 0
param norm = 50.47177505493164

Epoch 34 in 423.01 sec
Train accuracy :	0.841	(42048/50000)		Train loss :	0.4771
Val accuracy   :	0.815	(8152/10000)		Val loss :	0.5553
Top-5 val acc  :	0.988	(9882/10000)


Mean log L2 = -2.272520065307617
Total dropped = 0
param norm = 50.6298713684082

Epoch 35 in 422.80 sec
Train accuracy :	0.845	(42252/50000)		Train loss :	0.4684
Val accuracy   :	0.813	(8132/10000)		Val loss :	0.5779
Top-5 val acc  :	0.988	(9884/10000)


Mean log L2 = -2.359907627105713
Total dropped = 0
param norm = 50.79276657104492

Epoch 36 in 422.99 sec
Train accuracy :	0.847	(42344/50000)		Train loss :	0.4571
Val accuracy   :	0.807	(8074/10000)		Val loss :	0.5903
Top-5 val acc  :	0.989	(9886/10000)


Mean log L2 = -2.515942335128784
Total dropped = 0
param norm = 50.941505432128906

Epoch 37 in 423.04 sec
Train accuracy :	0.852	(42609/50000)		Train loss :	0.4443
Val accuracy   :	0.805	(8047/10000)		Val loss :	0.6095
Top-5 val acc  :	0.986	(9863/10000)


Mean log L2 = -2.312631607055664
Total dropped = 0
param norm = 51.06250762939453

Epoch 38 in 422.93 sec
Train accuracy :	0.857	(42858/50000)		Train loss :	0.4264
Val accuracy   :	0.817	(8167/10000)		Val loss :	0.5489
Top-5 val acc  :	0.989	(9888/10000)


Mean log L2 = -2.6013739109039307
Total dropped = 0
param norm = 51.16911697387695

Epoch 39 in 422.87 sec
Train accuracy :	0.863	(43125/50000)		Train loss :	0.416
Val accuracy   :	0.816	(8164/10000)		Val loss :	0.5486
Top-5 val acc  :	0.989	(9894/10000)


Mean log L2 = -2.3468894958496094
Total dropped = 0
param norm = 51.25130844116211

Epoch 40 in 422.61 sec
Train accuracy :	0.865	(43225/50000)		Train loss :	0.4061
Val accuracy   :	0.821	(8208/10000)		Val loss :	0.568
Top-5 val acc  :	0.988	(9879/10000)


Mean log L2 = -2.3131043910980225
Total dropped = 0
param norm = 51.3348388671875

Epoch 41 in 423.76 sec
Train accuracy :	0.87	(43498/50000)		Train loss :	0.3928
Val accuracy   :	0.828	(8278/10000)		Val loss :	0.5382
Top-5 val acc  :	0.989	(9889/10000)


Mean log L2 = -2.3082962036132812
Total dropped = 0
param norm = 51.38975143432617

Epoch 42 in 422.77 sec
Train accuracy :	0.87	(43484/50000)		Train loss :	0.3851
Val accuracy   :	0.828	(8281/10000)		Val loss :	0.5379
Top-5 val acc  :	0.988	(9878/10000)


Mean log L2 = -2.686715841293335
Total dropped = 0
param norm = 51.46757888793945

Epoch 43 in 422.79 sec
Train accuracy :	0.872	(43580/50000)		Train loss :	0.3839
Val accuracy   :	0.836	(8356/10000)		Val loss :	0.5115
Top-5 val acc  :	0.989	(9894/10000)


Mean log L2 = -2.3870630264282227
Total dropped = 0
param norm = 51.53670883178711

Epoch 44 in 426.25 sec
Train accuracy :	0.877	(43849/50000)		Train loss :	0.3692
Val accuracy   :	0.822	(8218/10000)		Val loss :	0.5737
Top-5 val acc  :	0.99	(9895/10000)


Mean log L2 = -2.409454107284546
Total dropped = 0
param norm = 51.58536911010742

Epoch 45 in 422.67 sec
Train accuracy :	0.88	(44011/50000)		Train loss :	0.3594
Val accuracy   :	0.842	(8416/10000)		Val loss :	0.511
Top-5 val acc  :	0.99	(9902/10000)


Mean log L2 = -2.33217716217041
Total dropped = 0
param norm = 51.630859375

Epoch 46 in 422.64 sec
Train accuracy :	0.884	(44184/50000)		Train loss :	0.3505
Val accuracy   :	0.83	(8296/10000)		Val loss :	0.5366
Top-5 val acc  :	0.989	(9891/10000)


Mean log L2 = -2.444744110107422
Total dropped = 0
param norm = 51.663978576660156

Epoch 47 in 422.75 sec
Train accuracy :	0.886	(44301/50000)		Train loss :	0.3398
Val accuracy   :	0.838	(8377/10000)		Val loss :	0.5147
Top-5 val acc  :	0.989	(9891/10000)


Mean log L2 = -2.3478734493255615
Total dropped = 0
param norm = 51.70526123046875

Epoch 48 in 422.93 sec
Train accuracy :	0.89	(44518/50000)		Train loss :	0.3309
Val accuracy   :	0.84	(8404/10000)		Val loss :	0.4944
Top-5 val acc  :	0.99	(9902/10000)


Mean log L2 = -2.5212740898132324
Total dropped = 0
param norm = 51.737342834472656

Epoch 49 in 423.12 sec
Train accuracy :	0.893	(44664/50000)		Train loss :	0.3205
Val accuracy   :	0.837	(8372/10000)		Val loss :	0.5351
Top-5 val acc  :	0.989	(9894/10000)


Mean log L2 = -2.444417715072632
Total dropped = 0
param norm = 51.73786544799805

Epoch 50 in 423.03 sec
Train accuracy :	0.896	(44784/50000)		Train loss :	0.3124
Val accuracy   :	0.842	(8422/10000)		Val loss :	0.5001
Top-5 val acc  :	0.991	(9908/10000)


Mean log L2 = -2.1121490001678467
Total dropped = 0
param norm = 51.75205993652344

Epoch 51 in 424.88 sec
Train accuracy :	0.9	(45005/50000)		Train loss :	0.3026
Val accuracy   :	0.835	(8348/10000)		Val loss :	0.5155
Top-5 val acc  :	0.989	(9890/10000)


Mean log L2 = -2.285566806793213
Total dropped = 0
param norm = 51.76338577270508

Epoch 52 in 423.05 sec
Train accuracy :	0.901	(45072/50000)		Train loss :	0.2974
Val accuracy   :	0.833	(8328/10000)		Val loss :	0.5362
Top-5 val acc  :	0.987	(9873/10000)


Mean log L2 = -2.2042629718780518
Total dropped = 0
param norm = 51.761871337890625

Epoch 53 in 425.01 sec
Train accuracy :	0.905	(45246/50000)		Train loss :	0.2888
Val accuracy   :	0.843	(8431/10000)		Val loss :	0.5106
Top-5 val acc  :	0.99	(9897/10000)


Mean log L2 = -2.2855594158172607
Total dropped = 0
param norm = 51.752559661865234

Epoch 54 in 422.49 sec
Train accuracy :	0.91	(45496/50000)		Train loss :	0.2763
Val accuracy   :	0.85	(8500/10000)		Val loss :	0.4877
Top-5 val acc  :	0.99	(9899/10000)


Mean log L2 = -2.2391364574432373
Total dropped = 0
param norm = 51.747257232666016

Epoch 55 in 422.89 sec
Train accuracy :	0.909	(45471/50000)		Train loss :	0.2724
Val accuracy   :	0.848	(8478/10000)		Val loss :	0.5111
Top-5 val acc  :	0.99	(9903/10000)


Mean log L2 = -2.2874743938446045
Total dropped = 0
param norm = 51.72286605834961

Epoch 56 in 422.81 sec
Train accuracy :	0.915	(45731/50000)		Train loss :	0.2619
Val accuracy   :	0.844	(8441/10000)		Val loss :	0.518
Top-5 val acc  :	0.99	(9901/10000)


Mean log L2 = -2.3876612186431885
Total dropped = 0
param norm = 51.69912338256836

Epoch 57 in 423.05 sec
Train accuracy :	0.915	(45759/50000)		Train loss :	0.2579
Val accuracy   :	0.85	(8500/10000)		Val loss :	0.5114
Top-5 val acc  :	0.991	(9909/10000)


Mean log L2 = -2.494577646255493
Total dropped = 0
param norm = 51.668785095214844

Epoch 58 in 422.64 sec
Train accuracy :	0.919	(45932/50000)		Train loss :	0.2498
Val accuracy   :	0.849	(8486/10000)		Val loss :	0.5068
Top-5 val acc  :	0.991	(9906/10000)


Mean log L2 = -2.5440385341644287
Total dropped = 0
param norm = 51.633384704589844

Epoch 59 in 422.32 sec
Train accuracy :	0.919	(45972/50000)		Train loss :	0.2481
Val accuracy   :	0.845	(8450/10000)		Val loss :	0.4962
Top-5 val acc  :	0.991	(9907/10000)


Mean log L2 = -2.5051121711730957
Total dropped = 0
param norm = 51.62797164916992

Epoch 60 in 422.75 sec
Train accuracy :	0.922	(46109/50000)		Train loss :	0.24
Val accuracy   :	0.854	(8538/10000)		Val loss :	0.5273
Top-5 val acc  :	0.989	(9893/10000)


Mean log L2 = -2.250025510787964
Total dropped = 0
param norm = 51.60477828979492

Epoch 61 in 422.41 sec
Train accuracy :	0.925	(46274/50000)		Train loss :	0.2304
Val accuracy   :	0.854	(8542/10000)		Val loss :	0.4957
Top-5 val acc  :	0.99	(9901/10000)


Mean log L2 = -2.534273862838745
Total dropped = 0
param norm = 51.5807991027832

Epoch 62 in 422.50 sec
Train accuracy :	0.927	(46367/50000)		Train loss :	0.2236
Val accuracy   :	0.857	(8565/10000)		Val loss :	0.5025
Top-5 val acc  :	0.992	(9916/10000)


Mean log L2 = -2.242915630340576
Total dropped = 0
param norm = 51.55183792114258

Epoch 63 in 424.18 sec
Train accuracy :	0.929	(46459/50000)		Train loss :	0.2179
Val accuracy   :	0.854	(8543/10000)		Val loss :	0.5085
Top-5 val acc  :	0.991	(9910/10000)


Mean log L2 = -2.28464937210083
Total dropped = 0
param norm = 51.52454376220703

Epoch 64 in 424.69 sec
Train accuracy :	0.932	(46576/50000)		Train loss :	0.2101
Val accuracy   :	0.848	(8482/10000)		Val loss :	0.5201
Top-5 val acc  :	0.99	(9896/10000)


Mean log L2 = -2.4303081035614014
Total dropped = 0
param norm = 51.492225646972656

Epoch 65 in 424.68 sec
Train accuracy :	0.934	(46679/50000)		Train loss :	0.2044
Val accuracy   :	0.857	(8566/10000)		Val loss :	0.503
Top-5 val acc  :	0.991	(9907/10000)


Mean log L2 = -2.427853584289551
Total dropped = 0
param norm = 51.467830657958984

Epoch 66 in 424.88 sec
Train accuracy :	0.934	(46721/50000)		Train loss :	0.2005
Val accuracy   :	0.86	(8603/10000)		Val loss :	0.4918
Top-5 val acc  :	0.99	(9904/10000)


Mean log L2 = -2.378157377243042
Total dropped = 0
param norm = 51.4466552734375

Epoch 67 in 424.56 sec
Train accuracy :	0.937	(46850/50000)		Train loss :	0.1959
Val accuracy   :	0.858	(8578/10000)		Val loss :	0.4976
Top-5 val acc  :	0.992	(9920/10000)


Mean log L2 = -2.250762939453125
Total dropped = 0
param norm = 51.41462326049805

Epoch 68 in 423.06 sec
Train accuracy :	0.94	(46991/50000)		Train loss :	0.1887
Val accuracy   :	0.855	(8547/10000)		Val loss :	0.5007
Top-5 val acc  :	0.991	(9908/10000)


Mean log L2 = -2.5245361328125
Total dropped = 0
param norm = 51.38471221923828

Epoch 69 in 422.45 sec
Train accuracy :	0.943	(47135/50000)		Train loss :	0.1784
Val accuracy   :	0.858	(8580/10000)		Val loss :	0.5012
Top-5 val acc  :	0.991	(9907/10000)


Mean log L2 = -2.4661407470703125
Total dropped = 0
param norm = 51.34671401977539

Epoch 70 in 422.84 sec
Train accuracy :	0.942	(47098/50000)		Train loss :	0.1802
Val accuracy   :	0.856	(8556/10000)		Val loss :	0.5115
Top-5 val acc  :	0.99	(9896/10000)


Mean log L2 = -2.439147472381592
Total dropped = 0
param norm = 51.32026290893555

Epoch 71 in 422.42 sec
Train accuracy :	0.944	(47187/50000)		Train loss :	0.174
Val accuracy   :	0.857	(8574/10000)		Val loss :	0.5291
Top-5 val acc  :	0.99	(9902/10000)


Mean log L2 = -2.4468908309936523
Total dropped = 0
param norm = 51.28556442260742

Epoch 72 in 422.65 sec
Train accuracy :	0.947	(47330/50000)		Train loss :	0.1705
Val accuracy   :	0.855	(8546/10000)		Val loss :	0.5337
Top-5 val acc  :	0.99	(9896/10000)


Mean log L2 = -2.427614212036133
Total dropped = 0
param norm = 51.25672149658203

Epoch 73 in 422.93 sec
Train accuracy :	0.947	(47358/50000)		Train loss :	0.1671
Val accuracy   :	0.858	(8582/10000)		Val loss :	0.5138
Top-5 val acc  :	0.99	(9897/10000)


Mean log L2 = -2.416599750518799
Total dropped = 0
param norm = 51.22678756713867

Epoch 74 in 422.55 sec
Train accuracy :	0.946	(47314/50000)		Train loss :	0.169
Val accuracy   :	0.858	(8582/10000)		Val loss :	0.5221
Top-5 val acc  :	0.989	(9890/10000)


Mean log L2 = -2.355058431625366
Total dropped = 0
param norm = 51.20612335205078

Epoch 75 in 422.71 sec
Train accuracy :	0.949	(47440/50000)		Train loss :	0.1618
Val accuracy   :	0.86	(8601/10000)		Val loss :	0.5344
Top-5 val acc  :	0.988	(9884/10000)


Mean log L2 = -2.4056026935577393
Total dropped = 0
param norm = 51.17877197265625

Epoch 76 in 422.79 sec
Train accuracy :	0.95	(47476/50000)		Train loss :	0.1621
Val accuracy   :	0.859	(8592/10000)		Val loss :	0.523
Top-5 val acc  :	0.989	(9890/10000)


Mean log L2 = -2.295180320739746
Total dropped = 0
param norm = 51.1591911315918

Epoch 77 in 423.61 sec
Train accuracy :	0.952	(47576/50000)		Train loss :	0.1565
Val accuracy   :	0.86	(8595/10000)		Val loss :	0.5158
Top-5 val acc  :	0.989	(9892/10000)


Mean log L2 = -2.3961265087127686
Total dropped = 0
param norm = 51.140933990478516

Epoch 78 in 422.41 sec
Train accuracy :	0.95	(47512/50000)		Train loss :	0.1576
Val accuracy   :	0.86	(8601/10000)		Val loss :	0.5218
Top-5 val acc  :	0.99	(9895/10000)


Mean log L2 = -2.4196646213531494
Total dropped = 0
param norm = 51.12522888183594

Epoch 79 in 422.86 sec
Train accuracy :	0.953	(47652/50000)		Train loss :	0.1517
Val accuracy   :	0.862	(8615/10000)		Val loss :	0.5316
Top-5 val acc  :	0.989	(9885/10000)


Mean log L2 = -2.539994239807129
Total dropped = 0
param norm = 51.111053466796875

Epoch 80 in 422.47 sec
Train accuracy :	0.953	(47643/50000)		Train loss :	0.1538
Val accuracy   :	0.861	(8612/10000)		Val loss :	0.5342
Top-5 val acc  :	0.988	(9884/10000)


Mean log L2 = -2.464008092880249
Total dropped = 0
param norm = 51.09767150878906

Epoch 81 in 422.25 sec
Train accuracy :	0.953	(47627/50000)		Train loss :	0.1519
Val accuracy   :	0.86	(8600/10000)		Val loss :	0.5333
Top-5 val acc  :	0.988	(9884/10000)


Mean log L2 = -2.3579750061035156
Total dropped = 0
param norm = 51.08461380004883

Epoch 82 in 422.56 sec
Train accuracy :	0.953	(47657/50000)		Train loss :	0.1493
Val accuracy   :	0.86	(8597/10000)		Val loss :	0.5285
Top-5 val acc  :	0.989	(9893/10000)


Mean log L2 = -2.4844820499420166
Total dropped = 0
param norm = 51.075984954833984

Epoch 83 in 422.87 sec
Train accuracy :	0.954	(47719/50000)		Train loss :	0.1471
Val accuracy   :	0.86	(8598/10000)		Val loss :	0.5379
Top-5 val acc  :	0.989	(9894/10000)


Mean log L2 = -2.4568591117858887
Total dropped = 0
param norm = 51.06897735595703

Epoch 84 in 422.55 sec
Train accuracy :	0.955	(47774/50000)		Train loss :	0.1433
Val accuracy   :	0.86	(8596/10000)		Val loss :	0.5486
Top-5 val acc  :	0.989	(9890/10000)


Mean log L2 = -2.6534481048583984
Total dropped = 0
param norm = 51.061336517333984

Epoch 85 in 422.95 sec
Train accuracy :	0.955	(47763/50000)		Train loss :	0.1437
Val accuracy   :	0.859	(8592/10000)		Val loss :	0.5373
Top-5 val acc  :	0.989	(9890/10000)


Mean log L2 = -2.4704368114471436
Total dropped = 0
param norm = 51.056583404541016

Epoch 86 in 422.47 sec
Train accuracy :	0.956	(47780/50000)		Train loss :	0.1454
Val accuracy   :	0.859	(8591/10000)		Val loss :	0.5363
Top-5 val acc  :	0.989	(9891/10000)


Mean log L2 = -2.4330270290374756
Total dropped = 0
param norm = 51.052921295166016

Epoch 87 in 422.75 sec
Train accuracy :	0.956	(47781/50000)		Train loss :	0.1452
Val accuracy   :	0.86	(8599/10000)		Val loss :	0.5379
Top-5 val acc  :	0.989	(9887/10000)


Mean log L2 = -2.3772575855255127
Total dropped = 0
param norm = 51.0505485534668

Epoch 88 in 422.22 sec
Train accuracy :	0.956	(47790/50000)		Train loss :	0.1427
Val accuracy   :	0.86	(8597/10000)		Val loss :	0.5399
Top-5 val acc  :	0.989	(9890/10000)


Mean log L2 = -2.356842517852783
Total dropped = 0
param norm = 51.04886245727539

Epoch 89 in 422.71 sec
Train accuracy :	0.957	(47830/50000)		Train loss :	0.1426
Val accuracy   :	0.86	(8603/10000)		Val loss :	0.5384
Top-5 val acc  :	0.989	(9890/10000)


Mean log L2 = -2.3904097080230713
Total dropped = 0
param norm = 51.04843521118164

Epoch 90 in 422.60 sec
Train accuracy :	0.956	(47780/50000)		Train loss :	0.1441
Val accuracy   :	0.861	(8609/10000)		Val loss :	0.5384
Top-5 val acc  :	0.989	(9887/10000)
