# Supplementary material
Source: ML conference proceedings conference paper supplement (https://proceedings.neurips.cc/paper_files/paper/2022/hash/545a114e655f9d25ba0d56ea9a01fc6e-Abstract.html)
Supplement: Supplementary file 1 [file 545a114e655f9d25ba0d56ea9a01fc6e-Supplemental-Conference.zip › revised_supplemental/code/results/fig4c/holo_N4/3/log.txt]

python train.py simus/ep/cnn/xpvgg6_cif10.json

Input   :	 (32, 32, 3)
Layer 1 :	 (16, 16, 128)
Layer 2 :	 (16, 16, 128)
Layer 3 :	 (8, 8, 256)
Layer 4 :	 (6, 6, 256)
Layer 5 :	 (3, 3, 512)
Layer 6 :	 (1, 1, 512)

Mean log L2 = -4.087888240814209
Total dropped = 0
param norm = 37.193660736083984

Epoch 1 in 1212.42 sec
Train accuracy :	0.113	(5643/50000)		Train loss :	2.2901
Val accuracy   :	0.191	(1914/10000)		Val loss :	2.1434
Top-5 val acc  :	0.711	(7112/10000)


Mean log L2 = -4.311191082000732
Total dropped = 0
param norm = 37.395973205566406

Epoch 2 in 422.53 sec
Train accuracy :	0.239	(11973/50000)		Train loss :	2.0299
Val accuracy   :	0.297	(2971/10000)		Val loss :	1.9253
Top-5 val acc  :	0.816	(8157/10000)


Mean log L2 = -4.524228096008301
Total dropped = 0
param norm = 37.803096771240234

Epoch 3 in 420.76 sec
Train accuracy :	0.317	(15836/50000)		Train loss :	1.8203
Val accuracy   :	0.361	(3608/10000)		Val loss :	1.6818
Top-5 val acc  :	0.883	(8829/10000)


Mean log L2 = -4.473344326019287
Total dropped = 0
param norm = 38.314544677734375

Epoch 4 in 423.54 sec
Train accuracy :	0.38	(19019/50000)		Train loss :	1.6584
Val accuracy   :	0.413	(4128/10000)		Val loss :	1.5718
Top-5 val acc  :	0.909	(9086/10000)


Mean log L2 = -3.830144166946411
Total dropped = 0
param norm = 38.89326095581055

Epoch 5 in 421.67 sec
Train accuracy :	0.431	(21572/50000)		Train loss :	1.5368
Val accuracy   :	0.469	(4687/10000)		Val loss :	1.4441
Top-5 val acc  :	0.926	(9258/10000)


Mean log L2 = -3.1609981060028076
Total dropped = 0
param norm = 39.496280670166016

Epoch 6 in 422.25 sec
Train accuracy :	0.473	(23660/50000)		Train loss :	1.4223
Val accuracy   :	0.525	(5255/10000)		Val loss :	1.3076
Top-5 val acc  :	0.938	(9377/10000)


Mean log L2 = -3.239530324935913
Total dropped = 0
param norm = 40.135704040527344

Epoch 7 in 421.64 sec
Train accuracy :	0.52	(25999/50000)		Train loss :	1.3225
Val accuracy   :	0.552	(5516/10000)		Val loss :	1.2281
Top-5 val acc  :	0.949	(9494/10000)


Mean log L2 = -3.0053458213806152
Total dropped = 0
param norm = 40.793025970458984

Epoch 8 in 422.13 sec
Train accuracy :	0.553	(27651/50000)		Train loss :	1.2427
Val accuracy   :	0.584	(5838/10000)		Val loss :	1.1726
Top-5 val acc  :	0.952	(9523/10000)


Mean log L2 = -3.2818031311035156
Total dropped = 0
param norm = 41.39380645751953

Epoch 9 in 421.55 sec
Train accuracy :	0.584	(29205/50000)		Train loss :	1.1714
Val accuracy   :	0.619	(6186/10000)		Val loss :	1.0888
Top-5 val acc  :	0.96	(9597/10000)


Mean log L2 = -3.098612070083618
Total dropped = 0
param norm = 42.02279281616211

Epoch 10 in 421.70 sec
Train accuracy :	0.609	(30467/50000)		Train loss :	1.1032
Val accuracy   :	0.629	(6289/10000)		Val loss :	1.06
Top-5 val acc  :	0.958	(9579/10000)


Mean log L2 = -2.785017728805542
Total dropped = 0
param norm = 42.61391830444336

Epoch 11 in 421.53 sec
Train accuracy :	0.633	(31655/50000)		Train loss :	1.0414
Val accuracy   :	0.649	(6489/10000)		Val loss :	1.0079
Top-5 val acc  :	0.966	(9664/10000)


Mean log L2 = -3.0951366424560547
Total dropped = 0
param norm = 43.17456817626953

Epoch 12 in 424.55 sec
Train accuracy :	0.654	(32705/50000)		Train loss :	0.9909
Val accuracy   :	0.665	(6649/10000)		Val loss :	0.9641
Top-5 val acc  :	0.968	(9684/10000)


Mean log L2 = -3.063143491744995
Total dropped = 0
param norm = 43.73497772216797

Epoch 13 in 421.22 sec
Train accuracy :	0.668	(33394/50000)		Train loss :	0.9567
Val accuracy   :	0.683	(6830/10000)		Val loss :	0.9218
Top-5 val acc  :	0.967	(9670/10000)


Mean log L2 = -3.009819746017456
Total dropped = 0
param norm = 44.27782440185547

Epoch 14 in 421.54 sec
Train accuracy :	0.68	(33980/50000)		Train loss :	0.9211
Val accuracy   :	0.675	(6751/10000)		Val loss :	0.9424
Top-5 val acc  :	0.97	(9703/10000)


Mean log L2 = -2.9442474842071533
Total dropped = 0
param norm = 44.829959869384766

Epoch 15 in 421.97 sec
Train accuracy :	0.694	(34706/50000)		Train loss :	0.8885
Val accuracy   :	0.691	(6908/10000)		Val loss :	0.9021
Top-5 val acc  :	0.97	(9697/10000)


Mean log L2 = -2.866530656814575
Total dropped = 0
param norm = 45.32109832763672

Epoch 16 in 421.26 sec
Train accuracy :	0.711	(35539/50000)		Train loss :	0.8473
Val accuracy   :	0.708	(7081/10000)		Val loss :	0.8697
Top-5 val acc  :	0.971	(9707/10000)


Mean log L2 = -2.7567949295043945
Total dropped = 0
param norm = 45.837432861328125

Epoch 17 in 421.00 sec
Train accuracy :	0.723	(36153/50000)		Train loss :	0.8148
Val accuracy   :	0.722	(7224/10000)		Val loss :	0.8238
Top-5 val acc  :	0.975	(9752/10000)


Mean log L2 = -2.7040369510650635
Total dropped = 0
param norm = 46.269779205322266

Epoch 18 in 421.12 sec
Train accuracy :	0.733	(36627/50000)		Train loss :	0.7871
Val accuracy   :	0.726	(7258/10000)		Val loss :	0.8218
Top-5 val acc  :	0.976	(9763/10000)


Mean log L2 = -2.9838366508483887
Total dropped = 0
param norm = 46.704811096191406

Epoch 19 in 420.79 sec
Train accuracy :	0.74	(37013/50000)		Train loss :	0.7651
Val accuracy   :	0.738	(7383/10000)		Val loss :	0.7765
Top-5 val acc  :	0.979	(9793/10000)


Mean log L2 = -2.7537972927093506
Total dropped = 0
param norm = 47.15164566040039

Epoch 20 in 423.25 sec
Train accuracy :	0.748	(37401/50000)		Train loss :	0.7432
Val accuracy   :	0.744	(7443/10000)		Val loss :	0.7581
Top-5 val acc  :	0.981	(9811/10000)


Mean log L2 = -2.6990506649017334
Total dropped = 0
param norm = 47.55317687988281

Epoch 21 in 425.30 sec
Train accuracy :	0.757	(37842/50000)		Train loss :	0.7176
Val accuracy   :	0.746	(7461/10000)		Val loss :	0.7606
Top-5 val acc  :	0.98	(9799/10000)


Mean log L2 = -2.5625369548797607
Total dropped = 0
param norm = 47.945960998535156

Epoch 22 in 421.32 sec
Train accuracy :	0.763	(38129/50000)		Train loss :	0.7027
Val accuracy   :	0.747	(7467/10000)		Val loss :	0.7397
Top-5 val acc  :	0.98	(9802/10000)


Mean log L2 = -2.85505747795105
Total dropped = 0
param norm = 48.30862808227539

Epoch 23 in 420.98 sec
Train accuracy :	0.77	(38501/50000)		Train loss :	0.6817
Val accuracy   :	0.762	(7625/10000)		Val loss :	0.6962
Top-5 val acc  :	0.983	(9834/10000)


Mean log L2 = -2.6901512145996094
Total dropped = 0
param norm = 48.64605712890625

Epoch 24 in 420.78 sec
Train accuracy :	0.779	(38975/50000)		Train loss :	0.6534
Val accuracy   :	0.775	(7751/10000)		Val loss :	0.6694
Top-5 val acc  :	0.985	(9852/10000)


Mean log L2 = -2.571303367614746
Total dropped = 0
param norm = 48.947975158691406

Epoch 25 in 421.92 sec
Train accuracy :	0.788	(39423/50000)		Train loss :	0.6314
Val accuracy   :	0.777	(7770/10000)		Val loss :	0.6825
Top-5 val acc  :	0.981	(9807/10000)


Mean log L2 = -2.684783697128296
Total dropped = 0
param norm = 49.22075271606445

Epoch 26 in 421.35 sec
Train accuracy :	0.793	(39649/50000)		Train loss :	0.6162
Val accuracy   :	0.771	(7712/10000)		Val loss :	0.6913
Top-5 val acc  :	0.981	(9808/10000)


Mean log L2 = -2.541677236557007
Total dropped = 0
param norm = 49.48499298095703

Epoch 27 in 423.54 sec
Train accuracy :	0.797	(39845/50000)		Train loss :	0.604
Val accuracy   :	0.784	(7843/10000)		Val loss :	0.6364
Top-5 val acc  :	0.984	(9842/10000)


Mean log L2 = -2.2826194763183594
Total dropped = 0
param norm = 49.717830657958984

Epoch 28 in 421.35 sec
Train accuracy :	0.805	(40227/50000)		Train loss :	0.5847
Val accuracy   :	0.784	(7837/10000)		Val loss :	0.6457
Top-5 val acc  :	0.986	(9858/10000)


Mean log L2 = -2.719045400619507
Total dropped = 0
param norm = 49.937129974365234

Epoch 29 in 420.71 sec
Train accuracy :	0.812	(40600/50000)		Train loss :	0.5674
Val accuracy   :	0.786	(7857/10000)		Val loss :	0.6427
Top-5 val acc  :	0.983	(9830/10000)


Mean log L2 = -2.328977108001709
Total dropped = 0
param norm = 50.15486145019531

Epoch 30 in 422.99 sec
Train accuracy :	0.814	(40721/50000)		Train loss :	0.5564
Val accuracy   :	0.781	(7809/10000)		Val loss :	0.6601
Top-5 val acc  :	0.985	(9848/10000)


Mean log L2 = -2.4096453189849854
Total dropped = 0
param norm = 50.31565475463867

Epoch 31 in 420.85 sec
Train accuracy :	0.82	(40990/50000)		Train loss :	0.5402
Val accuracy   :	0.796	(7963/10000)		Val loss :	0.6051
Top-5 val acc  :	0.986	(9859/10000)


Mean log L2 = -2.7077949047088623
Total dropped = 0
param norm = 50.499717712402344

Epoch 32 in 421.01 sec
Train accuracy :	0.825	(41272/50000)		Train loss :	0.5274
Val accuracy   :	0.798	(7978/10000)		Val loss :	0.592
Top-5 val acc  :	0.987	(9873/10000)


Mean log L2 = -2.669631242752075
Total dropped = 0
param norm = 50.67949295043945

Epoch 33 in 420.89 sec
Train accuracy :	0.826	(41322/50000)		Train loss :	0.5181
Val accuracy   :	0.798	(7984/10000)		Val loss :	0.602
Top-5 val acc  :	0.988	(9878/10000)


Mean log L2 = -2.4891395568847656
Total dropped = 0
param norm = 50.847511291503906

Epoch 34 in 421.36 sec
Train accuracy :	0.834	(41682/50000)		Train loss :	0.5011
Val accuracy   :	0.801	(8009/10000)		Val loss :	0.5948
Top-5 val acc  :	0.987	(9866/10000)


Mean log L2 = -2.297520399093628
Total dropped = 0
param norm = 50.994117736816406

Epoch 35 in 421.36 sec
Train accuracy :	0.838	(41910/50000)		Train loss :	0.4881
Val accuracy   :	0.799	(7995/10000)		Val loss :	0.6082
Top-5 val acc  :	0.987	(9870/10000)


Mean log L2 = -2.2886483669281006
Total dropped = 0
param norm = 51.15275192260742

Epoch 36 in 421.84 sec
Train accuracy :	0.84	(41983/50000)		Train loss :	0.4776
Val accuracy   :	0.802	(8022/10000)		Val loss :	0.6215
Top-5 val acc  :	0.985	(9851/10000)


Mean log L2 = -2.369260549545288
Total dropped = 0
param norm = 51.261287689208984

Epoch 37 in 421.68 sec
Train accuracy :	0.844	(42196/50000)		Train loss :	0.4719
Val accuracy   :	0.817	(8171/10000)		Val loss :	0.5812
Top-5 val acc  :	0.986	(9858/10000)


Mean log L2 = -2.3565289974212646
Total dropped = 0
param norm = 51.369285583496094

Epoch 38 in 421.23 sec
Train accuracy :	0.849	(42460/50000)		Train loss :	0.4523
Val accuracy   :	0.808	(8081/10000)		Val loss :	0.5646
Top-5 val acc  :	0.988	(9884/10000)


Mean log L2 = -2.3760201930999756
Total dropped = 0
param norm = 51.48284149169922

Epoch 39 in 421.17 sec
Train accuracy :	0.855	(42728/50000)		Train loss :	0.4427
Val accuracy   :	0.811	(8112/10000)		Val loss :	0.5642
Top-5 val acc  :	0.987	(9867/10000)


Mean log L2 = -2.7857272624969482
Total dropped = 0
param norm = 51.566532135009766

Epoch 40 in 421.24 sec
Train accuracy :	0.857	(42858/50000)		Train loss :	0.4329
Val accuracy   :	0.818	(8176/10000)		Val loss :	0.5676
Top-5 val acc  :	0.987	(9874/10000)


Mean log L2 = -2.155113458633423
Total dropped = 0
param norm = 51.64269256591797

Epoch 41 in 422.46 sec
Train accuracy :	0.861	(43045/50000)		Train loss :	0.4216
Val accuracy   :	0.821	(8210/10000)		Val loss :	0.5494
Top-5 val acc  :	0.987	(9866/10000)


Mean log L2 = -2.4548141956329346
Total dropped = 0
param norm = 51.73869705200195

Epoch 42 in 421.00 sec
Train accuracy :	0.862	(43099/50000)		Train loss :	0.4146
Val accuracy   :	0.826	(8255/10000)		Val loss :	0.5414
Top-5 val acc  :	0.989	(9892/10000)


Mean log L2 = -2.3699052333831787
Total dropped = 0
param norm = 51.80843734741211

Epoch 43 in 421.02 sec
Train accuracy :	0.865	(43256/50000)		Train loss :	0.4038
Val accuracy   :	0.818	(8183/10000)		Val loss :	0.5558
Top-5 val acc  :	0.99	(9902/10000)


Mean log L2 = -2.2312800884246826
Total dropped = 0
param norm = 51.85988235473633

Epoch 44 in 424.75 sec
Train accuracy :	0.871	(43571/50000)		Train loss :	0.3907
Val accuracy   :	0.826	(8256/10000)		Val loss :	0.5429
Top-5 val acc  :	0.989	(9890/10000)


Mean log L2 = -2.3864848613739014
Total dropped = 0
param norm = 51.929527282714844

Epoch 45 in 421.07 sec
Train accuracy :	0.871	(43535/50000)		Train loss :	0.3884
Val accuracy   :	0.833	(8332/10000)		Val loss :	0.5324
Top-5 val acc  :	0.99	(9900/10000)


Mean log L2 = -2.324828863143921
Total dropped = 0
param norm = 51.976924896240234

Epoch 46 in 421.22 sec
Train accuracy :	0.876	(43810/50000)		Train loss :	0.3732
Val accuracy   :	0.823	(8225/10000)		Val loss :	0.547
Top-5 val acc  :	0.989	(9893/10000)


Mean log L2 = -2.2245585918426514
Total dropped = 0
param norm = 52.02096939086914

Epoch 47 in 420.81 sec
Train accuracy :	0.88	(43989/50000)		Train loss :	0.3669
Val accuracy   :	0.838	(8376/10000)		Val loss :	0.5175
Top-5 val acc  :	0.989	(9892/10000)


Mean log L2 = -2.3239972591400146
Total dropped = 0
param norm = 52.053993225097656

Epoch 48 in 421.97 sec
Train accuracy :	0.884	(44204/50000)		Train loss :	0.3476
Val accuracy   :	0.824	(8244/10000)		Val loss :	0.5485
Top-5 val acc  :	0.989	(9889/10000)


Mean log L2 = -2.3067421913146973
Total dropped = 0
param norm = 52.083438873291016

Epoch 49 in 421.68 sec
Train accuracy :	0.888	(44401/50000)		Train loss :	0.3424
Val accuracy   :	0.828	(8282/10000)		Val loss :	0.5572
Top-5 val acc  :	0.989	(9888/10000)


Mean log L2 = -2.392284870147705
Total dropped = 0
param norm = 52.104766845703125

Epoch 50 in 421.27 sec
Train accuracy :	0.889	(44461/50000)		Train loss :	0.3348
Val accuracy   :	0.83	(8298/10000)		Val loss :	0.5339
Top-5 val acc  :	0.99	(9901/10000)


Mean log L2 = -2.218177318572998
Total dropped = 0
param norm = 52.13959503173828

Epoch 51 in 423.95 sec
Train accuracy :	0.89	(44521/50000)		Train loss :	0.3327
Val accuracy   :	0.835	(8351/10000)		Val loss :	0.5426
Top-5 val acc  :	0.99	(9895/10000)


Mean log L2 = -2.387843608856201
Total dropped = 0
param norm = 52.14407730102539

Epoch 52 in 421.58 sec
Train accuracy :	0.892	(44625/50000)		Train loss :	0.3242
Val accuracy   :	0.833	(8334/10000)		Val loss :	0.5322
Top-5 val acc  :	0.99	(9903/10000)


Mean log L2 = -2.3415422439575195
Total dropped = 0
param norm = 52.158599853515625

Epoch 53 in 423.94 sec
Train accuracy :	0.899	(44929/50000)		Train loss :	0.3101
Val accuracy   :	0.827	(8271/10000)		Val loss :	0.5708
Top-5 val acc  :	0.989	(9886/10000)


Mean log L2 = -2.4291160106658936
Total dropped = 0
param norm = 52.164249420166016

Epoch 54 in 421.32 sec
Train accuracy :	0.9	(45007/50000)		Train loss :	0.3015
Val accuracy   :	0.835	(8352/10000)		Val loss :	0.5158
Top-5 val acc  :	0.989	(9890/10000)


Mean log L2 = -2.341874361038208
Total dropped = 0
param norm = 52.17023468017578

Epoch 55 in 421.21 sec
Train accuracy :	0.901	(45072/50000)		Train loss :	0.2989
Val accuracy   :	0.84	(8400/10000)		Val loss :	0.5208
Top-5 val acc  :	0.99	(9900/10000)


Mean log L2 = -2.3814573287963867
Total dropped = 0
param norm = 52.1746826171875

Epoch 56 in 421.18 sec
Train accuracy :	0.905	(45226/50000)		Train loss :	0.2886
Val accuracy   :	0.841	(8410/10000)		Val loss :	0.5342
Top-5 val acc  :	0.989	(9894/10000)


Mean log L2 = -2.2035248279571533
Total dropped = 0
param norm = 52.177085876464844

Epoch 57 in 421.83 sec
Train accuracy :	0.909	(45455/50000)		Train loss :	0.2804
Val accuracy   :	0.836	(8357/10000)		Val loss :	0.5408
Top-5 val acc  :	0.989	(9886/10000)


Mean log L2 = -2.2304129600524902
Total dropped = 0
param norm = 52.16297149658203

Epoch 58 in 420.78 sec
Train accuracy :	0.912	(45597/50000)		Train loss :	0.2715
Val accuracy   :	0.842	(8418/10000)		Val loss :	0.5126
Top-5 val acc  :	0.989	(9887/10000)


Mean log L2 = -2.532440185546875
Total dropped = 0
param norm = 52.16024398803711

Epoch 59 in 420.64 sec
Train accuracy :	0.913	(45627/50000)		Train loss :	0.2666
Val accuracy   :	0.844	(8435/10000)		Val loss :	0.5278
Top-5 val acc  :	0.99	(9895/10000)


Mean log L2 = -2.2621829509735107
Total dropped = 0
param norm = 52.151920318603516

Epoch 60 in 420.86 sec
Train accuracy :	0.915	(45734/50000)		Train loss :	0.261
Val accuracy   :	0.841	(8405/10000)		Val loss :	0.507
Top-5 val acc  :	0.989	(9889/10000)


Mean log L2 = -2.3163204193115234
Total dropped = 0
param norm = 52.143863677978516

Epoch 61 in 420.83 sec
Train accuracy :	0.919	(45937/50000)		Train loss :	0.2488
Val accuracy   :	0.844	(8435/10000)		Val loss :	0.5198
Top-5 val acc  :	0.99	(9904/10000)


Mean log L2 = -2.4656052589416504
Total dropped = 0
param norm = 52.1251106262207

Epoch 62 in 421.04 sec
Train accuracy :	0.92	(45997/50000)		Train loss :	0.2474
Val accuracy   :	0.837	(8370/10000)		Val loss :	0.5446
Top-5 val acc  :	0.991	(9905/10000)


Mean log L2 = -2.355458974838257
Total dropped = 0
param norm = 52.11374282836914

Epoch 63 in 423.56 sec
Train accuracy :	0.922	(46099/50000)		Train loss :	0.2403
Val accuracy   :	0.831	(8311/10000)		Val loss :	0.575
Top-5 val acc  :	0.99	(9898/10000)


Mean log L2 = -2.2619340419769287
Total dropped = 0
param norm = 52.09608459472656

Epoch 64 in 423.52 sec
Train accuracy :	0.925	(46241/50000)		Train loss :	0.2303
Val accuracy   :	0.843	(8426/10000)		Val loss :	0.5467
Top-5 val acc  :	0.99	(9901/10000)


Mean log L2 = -2.2437024116516113
Total dropped = 0
param norm = 52.07783889770508

Epoch 65 in 423.43 sec
Train accuracy :	0.927	(46330/50000)		Train loss :	0.2249
Val accuracy   :	0.844	(8439/10000)		Val loss :	0.535
Top-5 val acc  :	0.991	(9909/10000)


Mean log L2 = -2.2195146083831787
Total dropped = 0
param norm = 52.062278747558594

Epoch 66 in 423.95 sec
Train accuracy :	0.929	(46475/50000)		Train loss :	0.2171
Val accuracy   :	0.85	(8500/10000)		Val loss :	0.5139
Top-5 val acc  :	0.99	(9899/10000)


Mean log L2 = -2.215416431427002
Total dropped = 0
param norm = 52.050621032714844

Epoch 67 in 423.64 sec
Train accuracy :	0.93	(46513/50000)		Train loss :	0.2133
Val accuracy   :	0.846	(8459/10000)		Val loss :	0.5411
Top-5 val acc  :	0.99	(9895/10000)


Mean log L2 = -2.1372392177581787
Total dropped = 0
param norm = 52.03075408935547

Epoch 68 in 422.14 sec
Train accuracy :	0.931	(46545/50000)		Train loss :	0.2101
Val accuracy   :	0.849	(8491/10000)		Val loss :	0.5309
Top-5 val acc  :	0.989	(9885/10000)


Mean log L2 = -2.4002373218536377
Total dropped = 0
param norm = 52.00935745239258

Epoch 69 in 421.00 sec
Train accuracy :	0.933	(46673/50000)		Train loss :	0.2057
Val accuracy   :	0.852	(8516/10000)		Val loss :	0.5275
Top-5 val acc  :	0.99	(9897/10000)


Mean log L2 = -2.5188777446746826
Total dropped = 0
param norm = 51.988739013671875

Epoch 70 in 420.79 sec
Train accuracy :	0.938	(46897/50000)		Train loss :	0.1951
Val accuracy   :	0.847	(8470/10000)		Val loss :	0.5429
Top-5 val acc  :	0.989	(9889/10000)


Mean log L2 = -2.463902711868286
Total dropped = 0
param norm = 51.970863342285156

Epoch 71 in 421.20 sec
Train accuracy :	0.938	(46923/50000)		Train loss :	0.1927
Val accuracy   :	0.848	(8475/10000)		Val loss :	0.5388
Top-5 val acc  :	0.989	(9889/10000)


Mean log L2 = -2.2194671630859375
Total dropped = 0
param norm = 51.95634460449219

Epoch 72 in 420.83 sec
Train accuracy :	0.94	(46987/50000)		Train loss :	0.1877
Val accuracy   :	0.848	(8478/10000)		Val loss :	0.5392
Top-5 val acc  :	0.989	(9890/10000)


Mean log L2 = -2.2312123775482178
Total dropped = 0
param norm = 51.940242767333984

Epoch 73 in 420.97 sec
Train accuracy :	0.941	(47048/50000)		Train loss :	0.1833
Val accuracy   :	0.849	(8488/10000)		Val loss :	0.524
Top-5 val acc  :	0.99	(9896/10000)


Mean log L2 = -2.355006217956543
Total dropped = 0
param norm = 51.92708206176758

Epoch 74 in 420.82 sec
Train accuracy :	0.943	(47145/50000)		Train loss :	0.1787
Val accuracy   :	0.849	(8494/10000)		Val loss :	0.5425
Top-5 val acc  :	0.99	(9901/10000)


Mean log L2 = -2.285963535308838
Total dropped = 0
param norm = 51.91085433959961

Epoch 75 in 421.01 sec
Train accuracy :	0.943	(47166/50000)		Train loss :	0.1754
Val accuracy   :	0.85	(8501/10000)		Val loss :	0.547
Top-5 val acc  :	0.989	(9894/10000)


Mean log L2 = -2.3321588039398193
Total dropped = 0
param norm = 51.898075103759766

Epoch 76 in 421.77 sec
Train accuracy :	0.943	(47165/50000)		Train loss :	0.1759
Val accuracy   :	0.849	(8492/10000)		Val loss :	0.5619
Top-5 val acc  :	0.989	(9893/10000)


Mean log L2 = -2.220076084136963
Total dropped = 0
param norm = 51.88664245605469

Epoch 77 in 421.81 sec
Train accuracy :	0.948	(47385/50000)		Train loss :	0.1645
Val accuracy   :	0.847	(8468/10000)		Val loss :	0.5468
Top-5 val acc  :	0.989	(9889/10000)


Mean log L2 = -2.2049400806427
Total dropped = 0
param norm = 51.874935150146484

Epoch 78 in 420.85 sec
Train accuracy :	0.947	(47372/50000)		Train loss :	0.1674
Val accuracy   :	0.851	(8512/10000)		Val loss :	0.5427
Top-5 val acc  :	0.989	(9890/10000)


Mean log L2 = -2.411567449569702
Total dropped = 0
param norm = 51.864742279052734

Epoch 79 in 420.94 sec
Train accuracy :	0.95	(47505/50000)		Train loss :	0.1615
Val accuracy   :	0.853	(8531/10000)		Val loss :	0.5427
Top-5 val acc  :	0.99	(9899/10000)


Mean log L2 = -2.2797107696533203
Total dropped = 0
param norm = 51.85590362548828

Epoch 80 in 420.85 sec
Train accuracy :	0.949	(47461/50000)		Train loss :	0.1604
Val accuracy   :	0.853	(8525/10000)		Val loss :	0.5569
Top-5 val acc  :	0.99	(9903/10000)


Mean log L2 = -2.3853962421417236
Total dropped = 0
param norm = 51.84688949584961

Epoch 81 in 420.64 sec
Train accuracy :	0.951	(47550/50000)		Train loss :	0.1548
Val accuracy   :	0.851	(8511/10000)		Val loss :	0.5484
Top-5 val acc  :	0.989	(9894/10000)


Mean log L2 = -2.3404629230499268
Total dropped = 0
param norm = 51.839656829833984

Epoch 82 in 420.75 sec
Train accuracy :	0.949	(47435/50000)		Train loss :	0.1592
Val accuracy   :	0.85	(8499/10000)		Val loss :	0.5551
Top-5 val acc  :	0.989	(9890/10000)


Mean log L2 = -2.3769173622131348
Total dropped = 0
param norm = 51.83566665649414

Epoch 83 in 421.35 sec
Train accuracy :	0.952	(47605/50000)		Train loss :	0.1534
Val accuracy   :	0.85	(8498/10000)		Val loss :	0.5675
Top-5 val acc  :	0.99	(9896/10000)


Mean log L2 = -2.370222568511963
Total dropped = 0
param norm = 51.8320426940918

Epoch 84 in 421.20 sec
Train accuracy :	0.952	(47600/50000)		Train loss :	0.149
Val accuracy   :	0.851	(8506/10000)		Val loss :	0.57
Top-5 val acc  :	0.989	(9892/10000)


Mean log L2 = -2.478611707687378
Total dropped = 0
param norm = 51.82747268676758

Epoch 85 in 421.26 sec
Train accuracy :	0.951	(47547/50000)		Train loss :	0.1532
Val accuracy   :	0.851	(8513/10000)		Val loss :	0.5649
Top-5 val acc  :	0.99	(9895/10000)


Mean log L2 = -2.4127025604248047
Total dropped = 0
param norm = 51.82485580444336

Epoch 86 in 420.65 sec
Train accuracy :	0.954	(47682/50000)		Train loss :	0.1471
Val accuracy   :	0.85	(8498/10000)		Val loss :	0.5704
Top-5 val acc  :	0.99	(9896/10000)


Mean log L2 = -2.4601268768310547
Total dropped = 0
param norm = 51.82266616821289

Epoch 87 in 421.10 sec
Train accuracy :	0.954	(47677/50000)		Train loss :	0.1477
Val accuracy   :	0.85	(8496/10000)		Val loss :	0.5684
Top-5 val acc  :	0.989	(9893/10000)


Mean log L2 = -2.1928439140319824
Total dropped = 0
param norm = 51.821407318115234

Epoch 88 in 420.88 sec
Train accuracy :	0.955	(47727/50000)		Train loss :	0.1452
Val accuracy   :	0.851	(8511/10000)		Val loss :	0.5683
Top-5 val acc  :	0.989	(9891/10000)


Mean log L2 = -2.2733428478240967
Total dropped = 0
param norm = 51.820281982421875

Epoch 89 in 421.09 sec
Train accuracy :	0.955	(47728/50000)		Train loss :	0.1442
Val accuracy   :	0.851	(8509/10000)		Val loss :	0.5667
Top-5 val acc  :	0.99	(9895/10000)


Mean log L2 = -2.3636410236358643
Total dropped = 0
param norm = 51.82023620605469

Epoch 90 in 421.39 sec
Train accuracy :	0.955	(47762/50000)		Train loss :	0.1433
Val accuracy   :	0.85	(8504/10000)		Val loss :	0.5681
Top-5 val acc  :	0.99	(9897/10000)
