# Supplementary material
Source: ML conference proceedings conference paper supplement (https://proceedings.neurips.cc/paper_files/paper/2022/hash/545a114e655f9d25ba0d56ea9a01fc6e-Abstract.html)
Supplement: Supplementary file 1 [file 545a114e655f9d25ba0d56ea9a01fc6e-Supplemental-Conference.zip › revised_supplemental/code/results/table1/no_noise/classic_ep_1e-1/2022-08-01_17-34-50_xp_mlp_2h256_ep1_beta1e-1_noise0_run1/log.txt]

python train.py simus/train/xp_mlp_ep1_run1.json

Mean log L2 = -5.9664764404296875

Epoch 1 in 249.86 sec
Train accuracy :	0.914	(54855/60000)		Train loss :	0.2876
Val accuracy   :	0.915	(9148/10000)		Val loss :	0.2909


Mean log L2 = -5.978688716888428

Epoch 2 in 122.47 sec
Train accuracy :	0.958	(57488/60000)		Train loss :	0.141
Val accuracy   :	0.954	(9542/10000)		Val loss :	0.1617


Mean log L2 = -5.978367805480957

Epoch 3 in 116.14 sec
Train accuracy :	0.969	(58131/60000)		Train loss :	0.1075
Val accuracy   :	0.961	(9608/10000)		Val loss :	0.1332


Mean log L2 = -5.986515522003174

Epoch 4 in 116.35 sec
Train accuracy :	0.974	(58439/60000)		Train loss :	0.088
Val accuracy   :	0.967	(9667/10000)		Val loss :	0.1147


Mean log L2 = -5.97556209564209

Epoch 5 in 116.58 sec
Train accuracy :	0.97	(58218/60000)		Train loss :	0.0982
Val accuracy   :	0.962	(9618/10000)		Val loss :	0.1274


Mean log L2 = -5.985057353973389

Epoch 6 in 118.18 sec
Train accuracy :	0.978	(58681/60000)		Train loss :	0.0721
Val accuracy   :	0.965	(9650/10000)		Val loss :	0.12


Mean log L2 = -5.982681751251221

Epoch 7 in 116.30 sec
Train accuracy :	0.979	(58718/60000)		Train loss :	0.0692
Val accuracy   :	0.969	(9689/10000)		Val loss :	0.1112


Mean log L2 = -5.982229232788086

Epoch 8 in 116.78 sec
Train accuracy :	0.983	(58956/60000)		Train loss :	0.057
Val accuracy   :	0.967	(9667/10000)		Val loss :	0.1133


Mean log L2 = -5.984676361083984

Epoch 9 in 116.56 sec
Train accuracy :	0.977	(58611/60000)		Train loss :	0.0744
Val accuracy   :	0.966	(9656/10000)		Val loss :	0.1251


Mean log L2 = -5.981759548187256

Epoch 10 in 116.41 sec
Train accuracy :	0.987	(59209/60000)		Train loss :	0.042
Val accuracy   :	0.974	(9739/10000)		Val loss :	0.0952


Mean log L2 = -5.984650135040283

Epoch 11 in 116.13 sec
Train accuracy :	0.989	(59340/60000)		Train loss :	0.0348
Val accuracy   :	0.975	(9746/10000)		Val loss :	0.0942


Mean log L2 = -5.986474514007568

Epoch 12 in 116.41 sec
Train accuracy :	0.988	(59272/60000)		Train loss :	0.0373
Val accuracy   :	0.974	(9736/10000)		Val loss :	0.1002


Mean log L2 = -5.987601280212402

Epoch 13 in 116.31 sec
Train accuracy :	0.993	(59582/60000)		Train loss :	0.0239
Val accuracy   :	0.978	(9775/10000)		Val loss :	0.0844


Mean log L2 = -5.985313892364502

Epoch 14 in 116.23 sec
Train accuracy :	0.989	(59349/60000)		Train loss :	0.0354
Val accuracy   :	0.972	(9719/10000)		Val loss :	0.1093


Mean log L2 = -5.982005596160889

Epoch 15 in 116.58 sec
Train accuracy :	0.992	(59530/60000)		Train loss :	0.0258
Val accuracy   :	0.976	(9756/10000)		Val loss :	0.0877


Mean log L2 = -5.987678050994873

Epoch 16 in 116.54 sec
Train accuracy :	0.995	(59680/60000)		Train loss :	0.0181
Val accuracy   :	0.977	(9774/10000)		Val loss :	0.0865


Mean log L2 = -5.986019134521484

Epoch 17 in 116.44 sec
Train accuracy :	0.995	(59688/60000)		Train loss :	0.0177
Val accuracy   :	0.977	(9773/10000)		Val loss :	0.0873


Mean log L2 = -5.9851813316345215

Epoch 18 in 116.73 sec
Train accuracy :	0.989	(59326/60000)		Train loss :	0.0377
Val accuracy   :	0.971	(9711/10000)		Val loss :	0.1157


Mean log L2 = -5.987311840057373

Epoch 19 in 116.42 sec
Train accuracy :	0.994	(59634/60000)		Train loss :	0.0197
Val accuracy   :	0.977	(9773/10000)		Val loss :	0.0906


Mean log L2 = -5.975308895111084

Epoch 20 in 116.48 sec
Train accuracy :	0.995	(59726/60000)		Train loss :	0.0147
Val accuracy   :	0.979	(9788/10000)		Val loss :	0.0905


Mean log L2 = -5.987123012542725

Epoch 21 in 116.52 sec
Train accuracy :	0.993	(59574/60000)		Train loss :	0.0226
Val accuracy   :	0.976	(9756/10000)		Val loss :	0.0987


Mean log L2 = -5.9834418296813965

Epoch 22 in 116.56 sec
Train accuracy :	0.994	(59624/60000)		Train loss :	0.0198
Val accuracy   :	0.975	(9747/10000)		Val loss :	0.1033


Mean log L2 = -5.986119747161865

Epoch 23 in 116.56 sec
Train accuracy :	0.995	(59712/60000)		Train loss :	0.0162
Val accuracy   :	0.978	(9781/10000)		Val loss :	0.0912


Mean log L2 = -5.984825611114502

Epoch 24 in 116.28 sec
Train accuracy :	0.995	(59673/60000)		Train loss :	0.0171
Val accuracy   :	0.978	(9778/10000)		Val loss :	0.0907


Mean log L2 = -5.983670711517334

Epoch 25 in 116.12 sec
Train accuracy :	0.994	(59617/60000)		Train loss :	0.0198
Val accuracy   :	0.976	(9758/10000)		Val loss :	0.1007


Mean log L2 = -5.991000652313232

Epoch 26 in 116.62 sec
Train accuracy :	0.995	(59719/60000)		Train loss :	0.0144
Val accuracy   :	0.978	(9778/10000)		Val loss :	0.0958


Mean log L2 = -5.9898858070373535

Epoch 27 in 116.41 sec
Train accuracy :	0.995	(59701/60000)		Train loss :	0.0161
Val accuracy   :	0.976	(9761/10000)		Val loss :	0.1026


Mean log L2 = -5.985299110412598

Epoch 28 in 116.40 sec
Train accuracy :	0.996	(59731/60000)		Train loss :	0.0147
Val accuracy   :	0.978	(9776/10000)		Val loss :	0.0995


Mean log L2 = -5.990139961242676

Epoch 29 in 116.25 sec
Train accuracy :	0.991	(59446/60000)		Train loss :	0.029
Val accuracy   :	0.974	(9736/10000)		Val loss :	0.1103


Mean log L2 = -5.990135669708252

Epoch 30 in 116.51 sec
Train accuracy :	0.997	(59811/60000)		Train loss :	0.0102
Val accuracy   :	0.978	(9778/10000)		Val loss :	0.095


Mean log L2 = -5.988125324249268

Epoch 31 in 116.84 sec
Train accuracy :	0.998	(59855/60000)		Train loss :	0.0084
Val accuracy   :	0.98	(9800/10000)		Val loss :	0.0889


Mean log L2 = -5.99165678024292

Epoch 32 in 116.89 sec
Train accuracy :	0.999	(59928/60000)		Train loss :	0.0052
Val accuracy   :	0.979	(9785/10000)		Val loss :	0.0979


Mean log L2 = -5.982949733734131

Epoch 33 in 116.33 sec
Train accuracy :	0.997	(59825/60000)		Train loss :	0.0096
Val accuracy   :	0.979	(9787/10000)		Val loss :	0.0972


Mean log L2 = -5.987856388092041

Epoch 34 in 116.58 sec
Train accuracy :	0.998	(59877/60000)		Train loss :	0.0072
Val accuracy   :	0.978	(9779/10000)		Val loss :	0.0996


Mean log L2 = -5.9908447265625

Epoch 35 in 116.29 sec
Train accuracy :	0.995	(59684/60000)		Train loss :	0.0173
Val accuracy   :	0.975	(9751/10000)		Val loss :	0.1038


Mean log L2 = -5.9826741218566895

Epoch 36 in 116.82 sec
Train accuracy :	0.994	(59611/60000)		Train loss :	0.0262
Val accuracy   :	0.973	(9734/10000)		Val loss :	0.1307


Mean log L2 = -5.985935211181641

Epoch 37 in 116.52 sec
Train accuracy :	0.998	(59855/60000)		Train loss :	0.0081
Val accuracy   :	0.977	(9765/10000)		Val loss :	0.1078


Mean log L2 = -5.988300323486328

Epoch 38 in 116.13 sec
Train accuracy :	0.997	(59816/60000)		Train loss :	0.0107
Val accuracy   :	0.976	(9763/10000)		Val loss :	0.113


Mean log L2 = -5.987398147583008

Epoch 39 in 116.70 sec
Train accuracy :	0.997	(59810/60000)		Train loss :	0.0101
Val accuracy   :	0.978	(9779/10000)		Val loss :	0.0952


Mean log L2 = -5.984492778778076

Epoch 40 in 116.44 sec
Train accuracy :	0.998	(59906/60000)		Train loss :	0.0059
Val accuracy   :	0.978	(9780/10000)		Val loss :	0.1065


Mean log L2 = -5.991997241973877

Epoch 41 in 116.48 sec
Train accuracy :	0.999	(59946/60000)		Train loss :	0.0043
Val accuracy   :	0.98	(9801/10000)		Val loss :	0.099


Mean log L2 = -5.991931438446045

Epoch 42 in 116.36 sec
Train accuracy :	0.999	(59932/60000)		Train loss :	0.0045
Val accuracy   :	0.981	(9809/10000)		Val loss :	0.0993


Mean log L2 = -5.990375995635986

Epoch 43 in 116.36 sec
Train accuracy :	0.996	(59785/60000)		Train loss :	0.0119
Val accuracy   :	0.977	(9774/10000)		Val loss :	0.1044


Mean log L2 = -5.9908833503723145

Epoch 44 in 116.36 sec
Train accuracy :	0.999	(59942/60000)		Train loss :	0.0038
Val accuracy   :	0.981	(9812/10000)		Val loss :	0.0953


Mean log L2 = -5.988008499145508

Epoch 45 in 116.48 sec
Train accuracy :	0.999	(59913/60000)		Train loss :	0.0054
Val accuracy   :	0.981	(9813/10000)		Val loss :	0.089


Mean log L2 = -5.9814066886901855

Epoch 46 in 116.62 sec
Train accuracy :	0.999	(59948/60000)		Train loss :	0.0033
Val accuracy   :	0.981	(9813/10000)		Val loss :	0.0992


Mean log L2 = -5.991295337677002

Epoch 47 in 113.70 sec
Train accuracy :	0.996	(59753/60000)		Train loss :	0.0123
Val accuracy   :	0.976	(9760/10000)		Val loss :	0.1143


Mean log L2 = -5.983989238739014

Epoch 48 in 110.12 sec
Train accuracy :	0.999	(59954/60000)		Train loss :	0.0036
Val accuracy   :	0.981	(9811/10000)		Val loss :	0.0982


Mean log L2 = -5.985607624053955

Epoch 49 in 103.57 sec
Train accuracy :	0.999	(59917/60000)		Train loss :	0.0052
Val accuracy   :	0.979	(9787/10000)		Val loss :	0.0949


Mean log L2 = -5.9883341789245605

Epoch 50 in 103.79 sec
Train accuracy :	0.998	(59894/60000)		Train loss :	0.0054
Val accuracy   :	0.981	(9814/10000)		Val loss :	0.0982
