# Supplementary material
Source: ML conference proceedings conference paper supplement (https://proceedings.neurips.cc/paper_files/paper/2022/hash/545a114e655f9d25ba0d56ea9a01fc6e-Abstract.html)
Supplement: Supplementary file 1 [file 545a114e655f9d25ba0d56ea9a01fc6e-Supplemental-Conference.zip › revised_supplemental/code/results/table1/no_noise/classic_ep_1e-1/2022-08-01_17-35-11_xp_mlp_2h256_ep1_beta1e-1_noise0_run2/log.txt]

python train.py simus/train/xp_mlp_ep1_run2.json

Mean log L2 = -5.969890117645264

Epoch 1 in 248.30 sec
Train accuracy :	0.911	(54663/60000)		Train loss :	0.2895
Val accuracy   :	0.908	(9081/10000)		Val loss :	0.3006


Mean log L2 = -5.977666854858398

Epoch 2 in 115.34 sec
Train accuracy :	0.959	(57533/60000)		Train loss :	0.142
Val accuracy   :	0.956	(9562/10000)		Val loss :	0.1556


Mean log L2 = -5.983285427093506

Epoch 3 in 110.95 sec
Train accuracy :	0.967	(58004/60000)		Train loss :	0.1096
Val accuracy   :	0.961	(9608/10000)		Val loss :	0.1328


Mean log L2 = -5.986835479736328

Epoch 4 in 111.00 sec
Train accuracy :	0.975	(58503/60000)		Train loss :	0.0842
Val accuracy   :	0.967	(9667/10000)		Val loss :	0.1125


Mean log L2 = -5.985592365264893

Epoch 5 in 110.92 sec
Train accuracy :	0.977	(58633/60000)		Train loss :	0.0768
Val accuracy   :	0.968	(9681/10000)		Val loss :	0.1058


Mean log L2 = -5.985957622528076

Epoch 6 in 113.27 sec
Train accuracy :	0.979	(58714/60000)		Train loss :	0.0702
Val accuracy   :	0.97	(9701/10000)		Val loss :	0.107


Mean log L2 = -5.986541271209717

Epoch 7 in 110.97 sec
Train accuracy :	0.976	(58559/60000)		Train loss :	0.0781
Val accuracy   :	0.964	(9637/10000)		Val loss :	0.1219


Mean log L2 = -5.984666347503662

Epoch 8 in 110.80 sec
Train accuracy :	0.983	(58989/60000)		Train loss :	0.0534
Val accuracy   :	0.973	(9727/10000)		Val loss :	0.0964


Mean log L2 = -5.987371444702148

Epoch 9 in 110.86 sec
Train accuracy :	0.987	(59244/60000)		Train loss :	0.0413
Val accuracy   :	0.972	(9720/10000)		Val loss :	0.097


Mean log L2 = -5.9879374504089355

Epoch 10 in 111.00 sec
Train accuracy :	0.986	(59131/60000)		Train loss :	0.0473
Val accuracy   :	0.971	(9707/10000)		Val loss :	0.108


Mean log L2 = -5.984908103942871

Epoch 11 in 111.23 sec
Train accuracy :	0.987	(59218/60000)		Train loss :	0.0415
Val accuracy   :	0.974	(9735/10000)		Val loss :	0.0986


Mean log L2 = -5.984528064727783

Epoch 12 in 111.16 sec
Train accuracy :	0.984	(59033/60000)		Train loss :	0.051
Val accuracy   :	0.973	(9733/10000)		Val loss :	0.103


Mean log L2 = -5.982589244842529

Epoch 13 in 110.77 sec
Train accuracy :	0.988	(59308/60000)		Train loss :	0.035
Val accuracy   :	0.976	(9758/10000)		Val loss :	0.0959


Mean log L2 = -5.987010478973389

Epoch 14 in 110.79 sec
Train accuracy :	0.99	(59414/60000)		Train loss :	0.0322
Val accuracy   :	0.974	(9737/10000)		Val loss :	0.1005


Mean log L2 = -5.98985481262207

Epoch 15 in 111.37 sec
Train accuracy :	0.988	(59309/60000)		Train loss :	0.0358
Val accuracy   :	0.971	(9710/10000)		Val loss :	0.1107


Mean log L2 = -5.984503269195557

Epoch 16 in 110.95 sec
Train accuracy :	0.985	(59093/60000)		Train loss :	0.0484
Val accuracy   :	0.969	(9693/10000)		Val loss :	0.1238


Mean log L2 = -5.9867119789123535

Epoch 17 in 111.19 sec
Train accuracy :	0.993	(59560/60000)		Train loss :	0.0241
Val accuracy   :	0.976	(9756/10000)		Val loss :	0.1056


Mean log L2 = -5.990657329559326

Epoch 18 in 110.92 sec
Train accuracy :	0.994	(59658/60000)		Train loss :	0.0202
Val accuracy   :	0.977	(9769/10000)		Val loss :	0.0899


Mean log L2 = -5.984281063079834

Epoch 19 in 110.97 sec
Train accuracy :	0.993	(59587/60000)		Train loss :	0.0218
Val accuracy   :	0.976	(9762/10000)		Val loss :	0.0898


Mean log L2 = -5.9895853996276855

Epoch 20 in 111.04 sec
Train accuracy :	0.99	(59401/60000)		Train loss :	0.0319
Val accuracy   :	0.973	(9729/10000)		Val loss :	0.0946


Mean log L2 = -5.981616973876953

Epoch 21 in 111.13 sec
Train accuracy :	0.992	(59526/60000)		Train loss :	0.0243
Val accuracy   :	0.976	(9762/10000)		Val loss :	0.0916


Mean log L2 = -5.988849639892578

Epoch 22 in 110.96 sec
Train accuracy :	0.994	(59661/60000)		Train loss :	0.0178
Val accuracy   :	0.978	(9784/10000)		Val loss :	0.0834


Mean log L2 = -5.981674671173096

Epoch 23 in 111.03 sec
Train accuracy :	0.994	(59619/60000)		Train loss :	0.0196
Val accuracy   :	0.977	(9772/10000)		Val loss :	0.0904


Mean log L2 = -5.988890171051025

Epoch 24 in 111.35 sec
Train accuracy :	0.996	(59737/60000)		Train loss :	0.0139
Val accuracy   :	0.981	(9805/10000)		Val loss :	0.0852


Mean log L2 = -5.986716270446777

Epoch 25 in 110.69 sec
Train accuracy :	0.995	(59714/60000)		Train loss :	0.0154
Val accuracy   :	0.977	(9768/10000)		Val loss :	0.0901


Mean log L2 = -5.986020565032959

Epoch 26 in 111.15 sec
Train accuracy :	0.997	(59836/60000)		Train loss :	0.0093
Val accuracy   :	0.978	(9783/10000)		Val loss :	0.0942


Mean log L2 = -5.985244274139404

Epoch 27 in 111.12 sec
Train accuracy :	0.996	(59759/60000)		Train loss :	0.0143
Val accuracy   :	0.977	(9768/10000)		Val loss :	0.106


Mean log L2 = -5.9836225509643555

Epoch 28 in 111.03 sec
Train accuracy :	0.994	(59662/60000)		Train loss :	0.018
Val accuracy   :	0.976	(9756/10000)		Val loss :	0.103


Mean log L2 = -5.989654541015625

Epoch 29 in 111.07 sec
Train accuracy :	0.996	(59787/60000)		Train loss :	0.0114
Val accuracy   :	0.978	(9775/10000)		Val loss :	0.096


Mean log L2 = -5.98329496383667

Epoch 30 in 110.87 sec
Train accuracy :	0.997	(59820/60000)		Train loss :	0.0098
Val accuracy   :	0.979	(9789/10000)		Val loss :	0.0914


Mean log L2 = -5.986596584320068

Epoch 31 in 111.05 sec
Train accuracy :	0.993	(59594/60000)		Train loss :	0.0218
Val accuracy   :	0.973	(9733/10000)		Val loss :	0.1059


Mean log L2 = -5.984323978424072

Epoch 32 in 110.90 sec
Train accuracy :	0.995	(59729/60000)		Train loss :	0.0134
Val accuracy   :	0.977	(9774/10000)		Val loss :	0.0953


Mean log L2 = -5.9861578941345215

Epoch 33 in 110.92 sec
Train accuracy :	0.997	(59848/60000)		Train loss :	0.009
Val accuracy   :	0.981	(9812/10000)		Val loss :	0.0806


Mean log L2 = -5.986756324768066

Epoch 34 in 110.71 sec
Train accuracy :	0.992	(59535/60000)		Train loss :	0.0284
Val accuracy   :	0.973	(9726/10000)		Val loss :	0.1272


Mean log L2 = -5.987705230712891

Epoch 35 in 110.94 sec
Train accuracy :	0.998	(59868/60000)		Train loss :	0.0074
Val accuracy   :	0.98	(9797/10000)		Val loss :	0.0832


Mean log L2 = -5.987229824066162

Epoch 36 in 110.95 sec
Train accuracy :	0.997	(59807/60000)		Train loss :	0.0113
Val accuracy   :	0.978	(9777/10000)		Val loss :	0.0965


Mean log L2 = -5.988064289093018

Epoch 37 in 111.03 sec
Train accuracy :	0.997	(59849/60000)		Train loss :	0.0083
Val accuracy   :	0.979	(9791/10000)		Val loss :	0.091


Mean log L2 = -5.99094295501709

Epoch 38 in 110.99 sec
Train accuracy :	0.998	(59854/60000)		Train loss :	0.0088
Val accuracy   :	0.981	(9809/10000)		Val loss :	0.0906


Mean log L2 = -5.990239143371582

Epoch 39 in 111.11 sec
Train accuracy :	0.996	(59749/60000)		Train loss :	0.0144
Val accuracy   :	0.978	(9781/10000)		Val loss :	0.1009


Mean log L2 = -5.985021114349365

Epoch 40 in 110.86 sec
Train accuracy :	0.996	(59738/60000)		Train loss :	0.0145
Val accuracy   :	0.977	(9773/10000)		Val loss :	0.095


Mean log L2 = -5.98608922958374

Epoch 41 in 110.72 sec
Train accuracy :	0.999	(59957/60000)		Train loss :	0.0034
Val accuracy   :	0.98	(9802/10000)		Val loss :	0.0933


Mean log L2 = -5.9824442863464355

Epoch 42 in 110.93 sec
Train accuracy :	0.998	(59879/60000)		Train loss :	0.0071
Val accuracy   :	0.981	(9807/10000)		Val loss :	0.0945


Mean log L2 = -5.989394187927246

Epoch 43 in 110.81 sec
Train accuracy :	0.998	(59908/60000)		Train loss :	0.0057
Val accuracy   :	0.98	(9800/10000)		Val loss :	0.0973


Mean log L2 = -5.988200664520264

Epoch 44 in 111.02 sec
Train accuracy :	0.998	(59875/60000)		Train loss :	0.0071
Val accuracy   :	0.977	(9773/10000)		Val loss :	0.1073


Mean log L2 = -5.988405704498291

Epoch 45 in 111.22 sec
Train accuracy :	0.998	(59861/60000)		Train loss :	0.0077
Val accuracy   :	0.981	(9806/10000)		Val loss :	0.0881


Mean log L2 = -5.983763694763184

Epoch 46 in 110.87 sec
Train accuracy :	1.0	(59974/60000)		Train loss :	0.0027
Val accuracy   :	0.98	(9796/10000)		Val loss :	0.0945


Mean log L2 = -5.989803314208984

Epoch 47 in 110.90 sec
Train accuracy :	0.996	(59789/60000)		Train loss :	0.0143
Val accuracy   :	0.978	(9775/10000)		Val loss :	0.1158


Mean log L2 = -5.9892802238464355

Epoch 48 in 111.15 sec
Train accuracy :	0.999	(59912/60000)		Train loss :	0.0052
Val accuracy   :	0.98	(9804/10000)		Val loss :	0.0971


Mean log L2 = -5.987605571746826

Epoch 49 in 109.54 sec
Train accuracy :	0.999	(59942/60000)		Train loss :	0.0036
Val accuracy   :	0.98	(9804/10000)		Val loss :	0.0998


Mean log L2 = -5.989773273468018

Epoch 50 in 106.26 sec
Train accuracy :	0.997	(59806/60000)		Train loss :	0.0109
Val accuracy   :	0.979	(9794/10000)		Val loss :	0.1012
