# Supplementary material
Source: ML conference proceedings conference paper supplement (https://proceedings.neurips.cc/paper_files/paper/2022/hash/545a114e655f9d25ba0d56ea9a01fc6e-Abstract.html)
Supplement: Supplementary file 1 [file 545a114e655f9d25ba0d56ea9a01fc6e-Supplemental-Conference.zip › revised_supplemental/code/results/table1/no_noise/classic_ep_1e-1/2022-08-01_17-35-21_xp_mlp_2h256_ep1_beta1e-1_noise0_run3/log.txt]

python train.py simus/train/xp_mlp_ep1_run3.json

Mean log L2 = -5.976502895355225

Epoch 1 in 246.23 sec
Train accuracy :	0.945	(56700/60000)		Train loss :	0.1931
Val accuracy   :	0.944	(9439/10000)		Val loss :	0.1939


Mean log L2 = -5.9808244705200195

Epoch 2 in 111.64 sec
Train accuracy :	0.953	(57195/60000)		Train loss :	0.1545
Val accuracy   :	0.949	(9493/10000)		Val loss :	0.167


Mean log L2 = -5.9768524169921875

Epoch 3 in 107.43 sec
Train accuracy :	0.966	(57932/60000)		Train loss :	0.114
Val accuracy   :	0.959	(9591/10000)		Val loss :	0.1405


Mean log L2 = -5.983847618103027

Epoch 4 in 107.80 sec
Train accuracy :	0.976	(58545/60000)		Train loss :	0.0831
Val accuracy   :	0.967	(9666/10000)		Val loss :	0.1081


Mean log L2 = -5.985489845275879

Epoch 5 in 107.95 sec
Train accuracy :	0.977	(58645/60000)		Train loss :	0.0743
Val accuracy   :	0.968	(9677/10000)		Val loss :	0.1099


Mean log L2 = -5.982165336608887

Epoch 6 in 109.93 sec
Train accuracy :	0.982	(58905/60000)		Train loss :	0.059
Val accuracy   :	0.97	(9696/10000)		Val loss :	0.1021


Mean log L2 = -5.984428405761719

Epoch 7 in 107.96 sec
Train accuracy :	0.985	(59113/60000)		Train loss :	0.0496
Val accuracy   :	0.974	(9736/10000)		Val loss :	0.0941


Mean log L2 = -5.986155033111572

Epoch 8 in 107.69 sec
Train accuracy :	0.983	(59003/60000)		Train loss :	0.0532
Val accuracy   :	0.974	(9735/10000)		Val loss :	0.099


Mean log L2 = -5.979752540588379

Epoch 9 in 107.85 sec
Train accuracy :	0.988	(59256/60000)		Train loss :	0.0402
Val accuracy   :	0.974	(9742/10000)		Val loss :	0.1008


Mean log L2 = -5.983127117156982

Epoch 10 in 107.70 sec
Train accuracy :	0.985	(59080/60000)		Train loss :	0.0492
Val accuracy   :	0.97	(9701/10000)		Val loss :	0.1062


Mean log L2 = -5.98548698425293

Epoch 11 in 107.94 sec
Train accuracy :	0.989	(59363/60000)		Train loss :	0.0355
Val accuracy   :	0.974	(9744/10000)		Val loss :	0.0942


Mean log L2 = -5.989289283752441

Epoch 12 in 107.85 sec
Train accuracy :	0.989	(59325/60000)		Train loss :	0.0366
Val accuracy   :	0.976	(9757/10000)		Val loss :	0.0884


Mean log L2 = -5.986225128173828

Epoch 13 in 107.69 sec
Train accuracy :	0.991	(59467/60000)		Train loss :	0.0286
Val accuracy   :	0.977	(9773/10000)		Val loss :	0.0881


Mean log L2 = -5.98060941696167

Epoch 14 in 107.99 sec
Train accuracy :	0.992	(59502/60000)		Train loss :	0.0278
Val accuracy   :	0.977	(9769/10000)		Val loss :	0.0842


Mean log L2 = -5.986534118652344

Epoch 15 in 108.07 sec
Train accuracy :	0.992	(59536/60000)		Train loss :	0.0246
Val accuracy   :	0.977	(9769/10000)		Val loss :	0.0879


Mean log L2 = -5.982938766479492

Epoch 16 in 107.90 sec
Train accuracy :	0.994	(59622/60000)		Train loss :	0.0211
Val accuracy   :	0.979	(9785/10000)		Val loss :	0.0853


Mean log L2 = -5.98750114440918

Epoch 17 in 107.47 sec
Train accuracy :	0.993	(59603/60000)		Train loss :	0.0222
Val accuracy   :	0.974	(9744/10000)		Val loss :	0.0903


Mean log L2 = -5.989482402801514

Epoch 18 in 107.75 sec
Train accuracy :	0.993	(59600/60000)		Train loss :	0.0216
Val accuracy   :	0.977	(9771/10000)		Val loss :	0.0812


Mean log L2 = -5.987393856048584

Epoch 19 in 107.85 sec
Train accuracy :	0.994	(59629/60000)		Train loss :	0.0198
Val accuracy   :	0.976	(9763/10000)		Val loss :	0.0875


Mean log L2 = -5.989736080169678

Epoch 20 in 107.78 sec
Train accuracy :	0.993	(59598/60000)		Train loss :	0.0211
Val accuracy   :	0.975	(9754/10000)		Val loss :	0.0972


Mean log L2 = -5.98190450668335

Epoch 21 in 107.37 sec
Train accuracy :	0.995	(59675/60000)		Train loss :	0.018
Val accuracy   :	0.979	(9785/10000)		Val loss :	0.0805


Mean log L2 = -5.980488300323486

Epoch 22 in 107.81 sec
Train accuracy :	0.988	(59255/60000)		Train loss :	0.0406
Val accuracy   :	0.97	(9695/10000)		Val loss :	0.1177


Mean log L2 = -5.988108158111572

Epoch 23 in 107.84 sec
Train accuracy :	0.997	(59827/60000)		Train loss :	0.0101
Val accuracy   :	0.979	(9792/10000)		Val loss :	0.0884


Mean log L2 = -5.981201171875

Epoch 24 in 107.68 sec
Train accuracy :	0.994	(59669/60000)		Train loss :	0.0174
Val accuracy   :	0.976	(9761/10000)		Val loss :	0.1014


Mean log L2 = -5.9860310554504395

Epoch 25 in 107.59 sec
Train accuracy :	0.991	(59486/60000)		Train loss :	0.0263
Val accuracy   :	0.975	(9751/10000)		Val loss :	0.1033


Mean log L2 = -5.980923652648926

Epoch 26 in 107.80 sec
Train accuracy :	0.995	(59684/60000)		Train loss :	0.0167
Val accuracy   :	0.979	(9792/10000)		Val loss :	0.0867


Mean log L2 = -5.988968372344971

Epoch 27 in 107.63 sec
Train accuracy :	0.996	(59747/60000)		Train loss :	0.0139
Val accuracy   :	0.979	(9793/10000)		Val loss :	0.0935


Mean log L2 = -5.991320610046387

Epoch 28 in 107.66 sec
Train accuracy :	0.996	(59768/60000)		Train loss :	0.012
Val accuracy   :	0.979	(9786/10000)		Val loss :	0.0935


Mean log L2 = -5.991724967956543

Epoch 29 in 107.77 sec
Train accuracy :	0.997	(59796/60000)		Train loss :	0.0114
Val accuracy   :	0.979	(9785/10000)		Val loss :	0.0901


Mean log L2 = -5.986789226531982

Epoch 30 in 107.76 sec
Train accuracy :	0.997	(59849/60000)		Train loss :	0.0079
Val accuracy   :	0.98	(9802/10000)		Val loss :	0.0975


Mean log L2 = -5.985930442810059

Epoch 31 in 107.94 sec
Train accuracy :	0.994	(59612/60000)		Train loss :	0.0198
Val accuracy   :	0.975	(9753/10000)		Val loss :	0.0897


Mean log L2 = -5.9869513511657715

Epoch 32 in 107.43 sec
Train accuracy :	0.998	(59865/60000)		Train loss :	0.0083
Val accuracy   :	0.981	(9810/10000)		Val loss :	0.0832


Mean log L2 = -5.992270469665527

Epoch 33 in 107.68 sec
Train accuracy :	0.993	(59606/60000)		Train loss :	0.0191
Val accuracy   :	0.978	(9779/10000)		Val loss :	0.0906


Mean log L2 = -5.980763912200928

Epoch 34 in 107.47 sec
Train accuracy :	0.997	(59848/60000)		Train loss :	0.0085
Val accuracy   :	0.978	(9780/10000)		Val loss :	0.0888


Mean log L2 = -5.991273403167725

Epoch 35 in 107.68 sec
Train accuracy :	0.998	(59883/60000)		Train loss :	0.0069
Val accuracy   :	0.98	(9798/10000)		Val loss :	0.0919


Mean log L2 = -5.9864044189453125

Epoch 36 in 107.84 sec
Train accuracy :	0.997	(59822/60000)		Train loss :	0.0105
Val accuracy   :	0.979	(9791/10000)		Val loss :	0.0973


Mean log L2 = -5.987884044647217

Epoch 37 in 107.70 sec
Train accuracy :	0.996	(59739/60000)		Train loss :	0.0144
Val accuracy   :	0.977	(9772/10000)		Val loss :	0.1043


Mean log L2 = -5.9796576499938965

Epoch 38 in 107.72 sec
Train accuracy :	0.998	(59867/60000)		Train loss :	0.0074
Val accuracy   :	0.98	(9797/10000)		Val loss :	0.0966


Mean log L2 = -5.988414287567139

Epoch 39 in 107.50 sec
Train accuracy :	0.998	(59889/60000)		Train loss :	0.0067
Val accuracy   :	0.98	(9801/10000)		Val loss :	0.0899


Mean log L2 = -5.983019828796387

Epoch 40 in 107.80 sec
Train accuracy :	0.997	(59845/60000)		Train loss :	0.0086
Val accuracy   :	0.98	(9804/10000)		Val loss :	0.091


Mean log L2 = -5.987259864807129

Epoch 41 in 107.91 sec
Train accuracy :	0.998	(59862/60000)		Train loss :	0.0077
Val accuracy   :	0.98	(9797/10000)		Val loss :	0.0873


Mean log L2 = -5.989170551300049

Epoch 42 in 107.75 sec
Train accuracy :	0.997	(59809/60000)		Train loss :	0.0099
Val accuracy   :	0.979	(9791/10000)		Val loss :	0.0899


Mean log L2 = -5.993351459503174

Epoch 43 in 107.54 sec
Train accuracy :	0.998	(59857/60000)		Train loss :	0.0084
Val accuracy   :	0.979	(9794/10000)		Val loss :	0.0907


Mean log L2 = -5.9854865074157715

Epoch 44 in 107.65 sec
Train accuracy :	0.999	(59953/60000)		Train loss :	0.0031
Val accuracy   :	0.98	(9803/10000)		Val loss :	0.0876


Mean log L2 = -5.987008571624756

Epoch 45 in 107.93 sec
Train accuracy :	0.999	(59931/60000)		Train loss :	0.0045
Val accuracy   :	0.98	(9800/10000)		Val loss :	0.092


Mean log L2 = -5.987094879150391

Epoch 46 in 107.60 sec
Train accuracy :	0.997	(59831/60000)		Train loss :	0.0096
Val accuracy   :	0.98	(9795/10000)		Val loss :	0.0861


Mean log L2 = -5.988738536834717

Epoch 47 in 107.81 sec
Train accuracy :	1.0	(59973/60000)		Train loss :	0.0025
Val accuracy   :	0.981	(9813/10000)		Val loss :	0.084


Mean log L2 = -5.98820161819458

Epoch 48 in 107.50 sec
Train accuracy :	0.999	(59918/60000)		Train loss :	0.0059
Val accuracy   :	0.98	(9803/10000)		Val loss :	0.0972


Mean log L2 = -5.984801292419434

Epoch 49 in 107.72 sec
Train accuracy :	0.998	(59878/60000)		Train loss :	0.0073
Val accuracy   :	0.979	(9786/10000)		Val loss :	0.0933


Mean log L2 = -5.9873366355896

Epoch 50 in 107.63 sec
Train accuracy :	0.999	(59951/60000)		Train loss :	0.0039
Val accuracy   :	0.98	(9800/10000)		Val loss :	0.089
