# Supplementary material
Source: ML conference proceedings conference paper supplement (https://proceedings.neurips.cc/paper_files/paper/2022/hash/545a114e655f9d25ba0d56ea9a01fc6e-Abstract.html)
Supplement: Supplementary file 1 [file 545a114e655f9d25ba0d56ea9a01fc6e-Supplemental-Conference.zip › revised_supplemental/code/results/table1/no_noise/classic_ep_4e-1/2022-08-01_18-21-28_xp_mlp_2h256_ep1_beta4e-1_noise0_run1/log.txt]

python train.py simus/train/xp_mlp_ep1_run1.json

Mean log L2 = -5.937685012817383

Epoch 1 in 291.15 sec
Train accuracy :	0.946	(56742/60000)		Train loss :	0.1846
Val accuracy   :	0.944	(9439/10000)		Val loss :	0.1942


Mean log L2 = -5.948602199554443

Epoch 2 in 153.07 sec
Train accuracy :	0.948	(56902/60000)		Train loss :	0.1766
Val accuracy   :	0.945	(9452/10000)		Val loss :	0.195


Mean log L2 = -5.9439778327941895

Epoch 3 in 153.70 sec
Train accuracy :	0.97	(58212/60000)		Train loss :	0.1002
Val accuracy   :	0.962	(9616/10000)		Val loss :	0.131


Mean log L2 = -5.95098352432251

Epoch 4 in 152.48 sec
Train accuracy :	0.965	(57908/60000)		Train loss :	0.1193
Val accuracy   :	0.958	(9584/10000)		Val loss :	0.1419


Mean log L2 = -5.949023246765137

Epoch 5 in 153.12 sec
Train accuracy :	0.978	(58685/60000)		Train loss :	0.0774
Val accuracy   :	0.969	(9689/10000)		Val loss :	0.1128


Mean log L2 = -5.9548749923706055

Epoch 6 in 153.89 sec
Train accuracy :	0.974	(58421/60000)		Train loss :	0.0886
Val accuracy   :	0.962	(9624/10000)		Val loss :	0.1295


Mean log L2 = -5.951990604400635

Epoch 7 in 154.12 sec
Train accuracy :	0.979	(58726/60000)		Train loss :	0.073
Val accuracy   :	0.967	(9672/10000)		Val loss :	0.1141


Mean log L2 = -5.958605766296387

Epoch 8 in 154.54 sec
Train accuracy :	0.977	(58640/60000)		Train loss :	0.0787
Val accuracy   :	0.964	(9638/10000)		Val loss :	0.1213


Mean log L2 = -5.964046001434326

Epoch 9 in 153.37 sec
Train accuracy :	0.98	(58804/60000)		Train loss :	0.0687
Val accuracy   :	0.966	(9663/10000)		Val loss :	0.1178


Mean log L2 = -5.952103137969971

Epoch 10 in 153.91 sec
Train accuracy :	0.926	(55587/60000)		Train loss :	0.2578
Val accuracy   :	0.914	(9139/10000)		Val loss :	0.3067


Mean log L2 = -5.9565300941467285

Epoch 11 in 153.91 sec
Train accuracy :	0.941	(56466/60000)		Train loss :	0.2136
Val accuracy   :	0.932	(9319/10000)		Val loss :	0.257


Mean log L2 = -5.955892562866211

Epoch 12 in 152.49 sec
Train accuracy :	0.974	(58466/60000)		Train loss :	0.0857
Val accuracy   :	0.96	(9601/10000)		Val loss :	0.1374


Mean log L2 = -5.965478420257568

Epoch 13 in 152.32 sec
Train accuracy :	0.989	(59327/60000)		Train loss :	0.0395
Val accuracy   :	0.974	(9738/10000)		Val loss :	0.0894


Mean log L2 = -5.969768524169922

Epoch 14 in 151.67 sec
Train accuracy :	0.975	(58499/60000)		Train loss :	0.0787
Val accuracy   :	0.961	(9605/10000)		Val loss :	0.1331


Mean log L2 = -5.965980052947998

Epoch 15 in 155.83 sec
Train accuracy :	0.988	(59279/60000)		Train loss :	0.0431
Val accuracy   :	0.972	(9717/10000)		Val loss :	0.0956


Mean log L2 = -5.9640374183654785

Epoch 16 in 151.54 sec
Train accuracy :	0.988	(59262/60000)		Train loss :	0.044
Val accuracy   :	0.97	(9699/10000)		Val loss :	0.1051


Mean log L2 = -5.967029094696045

Epoch 17 in 152.19 sec
Train accuracy :	0.99	(59404/60000)		Train loss :	0.0355
Val accuracy   :	0.972	(9718/10000)		Val loss :	0.0988


Mean log L2 = -5.963888645172119

Epoch 18 in 152.94 sec
Train accuracy :	0.986	(59180/60000)		Train loss :	0.049
Val accuracy   :	0.968	(9684/10000)		Val loss :	0.1155


Mean log L2 = -5.971824645996094

Epoch 19 in 152.02 sec
Train accuracy :	0.96	(57580/60000)		Train loss :	0.1461
Val accuracy   :	0.944	(9436/10000)		Val loss :	0.2167


Mean log L2 = -5.966794490814209

Epoch 20 in 152.34 sec
Train accuracy :	0.987	(59216/60000)		Train loss :	0.0459
Val accuracy   :	0.968	(9679/10000)		Val loss :	0.1072


Mean log L2 = -5.960938930511475

Epoch 21 in 154.71 sec
Train accuracy :	0.991	(59438/60000)		Train loss :	0.0353
Val accuracy   :	0.973	(9727/10000)		Val loss :	0.1001


Mean log L2 = -5.963604927062988

Epoch 22 in 151.98 sec
Train accuracy :	0.986	(59185/60000)		Train loss :	0.0488
Val accuracy   :	0.968	(9683/10000)		Val loss :	0.1165


Mean log L2 = -5.976367950439453

Epoch 23 in 153.55 sec
Train accuracy :	0.992	(59514/60000)		Train loss :	0.0313
Val accuracy   :	0.972	(9716/10000)		Val loss :	0.1029


Mean log L2 = -5.961945056915283

Epoch 24 in 154.28 sec
Train accuracy :	0.948	(56868/60000)		Train loss :	0.1787
Val accuracy   :	0.933	(9331/10000)		Val loss :	0.2572


Mean log L2 = -5.969956874847412

Epoch 25 in 153.14 sec
Train accuracy :	0.988	(59282/60000)		Train loss :	0.0395
Val accuracy   :	0.968	(9679/10000)		Val loss :	0.1095


Mean log L2 = -5.971501350402832

Epoch 26 in 150.65 sec
Train accuracy :	0.989	(59346/60000)		Train loss :	0.0391
Val accuracy   :	0.969	(9688/10000)		Val loss :	0.1143


Mean log L2 = -5.971104145050049

Epoch 27 in 153.85 sec
Train accuracy :	0.987	(59207/60000)		Train loss :	0.0467
Val accuracy   :	0.966	(9664/10000)		Val loss :	0.1273


Mean log L2 = -5.973322868347168

Epoch 28 in 151.74 sec
Train accuracy :	0.995	(59679/60000)		Train loss :	0.0195
Val accuracy   :	0.974	(9739/10000)		Val loss :	0.094


Mean log L2 = -5.972784042358398

Epoch 29 in 154.24 sec
Train accuracy :	0.991	(59432/60000)		Train loss :	0.0337
Val accuracy   :	0.97	(9695/10000)		Val loss :	0.1059


Mean log L2 = -5.97561502456665

Epoch 30 in 152.03 sec
Train accuracy :	0.995	(59698/60000)		Train loss :	0.0192
Val accuracy   :	0.975	(9750/10000)		Val loss :	0.0937


Mean log L2 = -5.972850322723389

Epoch 31 in 152.03 sec
Train accuracy :	0.99	(59383/60000)		Train loss :	0.0409
Val accuracy   :	0.968	(9680/10000)		Val loss :	0.1291


Mean log L2 = -5.973783016204834

Epoch 32 in 152.00 sec
Train accuracy :	0.989	(59320/60000)		Train loss :	0.0383
Val accuracy   :	0.969	(9691/10000)		Val loss :	0.1142


Mean log L2 = -5.973823547363281

Epoch 33 in 152.02 sec
Train accuracy :	0.99	(59421/60000)		Train loss :	0.0328
Val accuracy   :	0.969	(9688/10000)		Val loss :	0.1174


Mean log L2 = -5.9759111404418945

Epoch 34 in 201.95 sec
Train accuracy :	0.993	(59569/60000)		Train loss :	0.026
Val accuracy   :	0.969	(9691/10000)		Val loss :	0.1161


Mean log L2 = -5.979944705963135

Epoch 35 in 153.93 sec
Train accuracy :	0.995	(59729/60000)		Train loss :	0.0177
Val accuracy   :	0.975	(9754/10000)		Val loss :	0.1035


Mean log L2 = -5.9761481285095215

Epoch 36 in 152.80 sec
Train accuracy :	0.995	(59726/60000)		Train loss :	0.0172
Val accuracy   :	0.972	(9719/10000)		Val loss :	0.1055


Mean log L2 = -5.968299388885498

Epoch 37 in 152.16 sec
Train accuracy :	0.992	(59540/60000)		Train loss :	0.0272
Val accuracy   :	0.97	(9696/10000)		Val loss :	0.1162


Mean log L2 = -5.977787971496582

Epoch 38 in 152.13 sec
Train accuracy :	0.995	(59714/60000)		Train loss :	0.0185
Val accuracy   :	0.973	(9728/10000)		Val loss :	0.1148


Mean log L2 = -5.974200248718262

Epoch 39 in 151.76 sec
Train accuracy :	0.992	(59546/60000)		Train loss :	0.0286
Val accuracy   :	0.969	(9687/10000)		Val loss :	0.126


Mean log L2 = -5.975994110107422

Epoch 40 in 152.55 sec
Train accuracy :	0.996	(59782/60000)		Train loss :	0.0153
Val accuracy   :	0.975	(9749/10000)		Val loss :	0.1005


Mean log L2 = -5.977889060974121

Epoch 41 in 152.88 sec
Train accuracy :	0.996	(59754/60000)		Train loss :	0.0164
Val accuracy   :	0.975	(9753/10000)		Val loss :	0.1029


Mean log L2 = -5.981879711151123

Epoch 42 in 152.37 sec
Train accuracy :	0.996	(59752/60000)		Train loss :	0.0165
Val accuracy   :	0.974	(9744/10000)		Val loss :	0.0955


Mean log L2 = -5.979902744293213

Epoch 43 in 152.96 sec
Train accuracy :	0.998	(59877/60000)		Train loss :	0.0094
Val accuracy   :	0.976	(9763/10000)		Val loss :	0.0921


Mean log L2 = -5.977996826171875

Epoch 44 in 153.33 sec
Train accuracy :	0.995	(59714/60000)		Train loss :	0.0178
Val accuracy   :	0.973	(9726/10000)		Val loss :	0.1064


Mean log L2 = -5.982102394104004

Epoch 45 in 155.66 sec
Train accuracy :	0.997	(59833/60000)		Train loss :	0.0108
Val accuracy   :	0.976	(9760/10000)		Val loss :	0.0923


Mean log L2 = -5.980079174041748

Epoch 46 in 155.48 sec
Train accuracy :	0.996	(59748/60000)		Train loss :	0.0151
Val accuracy   :	0.972	(9723/10000)		Val loss :	0.1126


Mean log L2 = -5.983360290527344

Epoch 47 in 152.58 sec
Train accuracy :	0.976	(58582/60000)		Train loss :	0.0854
Val accuracy   :	0.959	(9586/10000)		Val loss :	0.1553


Mean log L2 = -5.973221302032471

Epoch 48 in 152.23 sec
Train accuracy :	0.998	(59869/60000)		Train loss :	0.0097
Val accuracy   :	0.977	(9770/10000)		Val loss :	0.0883


Mean log L2 = -5.9698805809021

Epoch 49 in 151.22 sec
Train accuracy :	0.997	(59790/60000)		Train loss :	0.0135
Val accuracy   :	0.976	(9758/10000)		Val loss :	0.0971


Mean log L2 = -5.975409984588623

Epoch 50 in 150.87 sec
Train accuracy :	0.997	(59849/60000)		Train loss :	0.0117
Val accuracy   :	0.976	(9756/10000)		Val loss :	0.0867
