# Supplementary material
Source: ML conference proceedings conference paper supplement (https://proceedings.neurips.cc/paper_files/paper/2022/hash/545a114e655f9d25ba0d56ea9a01fc6e-Abstract.html)
Supplement: Supplementary file 1 [file 545a114e655f9d25ba0d56ea9a01fc6e-Supplemental-Conference.zip › revised_supplemental/code/results/table1/no_noise/classic_ep_4e-1/2022-08-01_18-21-38_xp_mlp_2h256_ep1_beta4e-1_noise0_run2/log.txt]

python train.py simus/train/xp_mlp_ep1_run2.json

Mean log L2 = -5.947015285491943

Epoch 1 in 298.08 sec
Train accuracy :	0.933	(55975/60000)		Train loss :	0.2224
Val accuracy   :	0.932	(9318/10000)		Val loss :	0.2296


Mean log L2 = -5.9501118659973145

Epoch 2 in 155.12 sec
Train accuracy :	0.958	(57506/60000)		Train loss :	0.1418
Val accuracy   :	0.953	(9525/10000)		Val loss :	0.1585


Mean log L2 = -5.950331211090088

Epoch 3 in 153.88 sec
Train accuracy :	0.968	(58077/60000)		Train loss :	0.1113
Val accuracy   :	0.961	(9606/10000)		Val loss :	0.1381


Mean log L2 = -5.954000949859619

Epoch 4 in 154.88 sec
Train accuracy :	0.969	(58140/60000)		Train loss :	0.1042
Val accuracy   :	0.959	(9590/10000)		Val loss :	0.1412


Mean log L2 = -5.955088138580322

Epoch 5 in 150.89 sec
Train accuracy :	0.973	(58391/60000)		Train loss :	0.089
Val accuracy   :	0.963	(9625/10000)		Val loss :	0.1236


Mean log L2 = -5.960575103759766

Epoch 6 in 153.24 sec
Train accuracy :	0.968	(58078/60000)		Train loss :	0.1105
Val accuracy   :	0.957	(9570/10000)		Val loss :	0.1444


Mean log L2 = -5.789742946624756

Epoch 7 in 154.47 sec
Train accuracy :	0.957	(57423/60000)		Train loss :	0.1351
Val accuracy   :	0.947	(9469/10000)		Val loss :	0.1708


Mean log L2 = -5.959400177001953

Epoch 8 in 154.90 sec
Train accuracy :	0.982	(58948/60000)		Train loss :	0.0605
Val accuracy   :	0.97	(9695/10000)		Val loss :	0.1015


Mean log L2 = -5.964035511016846

Epoch 9 in 149.58 sec
Train accuracy :	0.983	(58979/60000)		Train loss :	0.06
Val accuracy   :	0.97	(9702/10000)		Val loss :	0.102


Mean log L2 = -5.959087371826172

Epoch 10 in 153.95 sec
Train accuracy :	0.967	(58031/60000)		Train loss :	0.1058
Val accuracy   :	0.955	(9553/10000)		Val loss :	0.1474


Mean log L2 = -5.960813522338867

Epoch 11 in 152.40 sec
Train accuracy :	0.985	(59074/60000)		Train loss :	0.0519
Val accuracy   :	0.968	(9681/10000)		Val loss :	0.1081


Mean log L2 = -5.960428237915039

Epoch 12 in 151.79 sec
Train accuracy :	0.986	(59167/60000)		Train loss :	0.0501
Val accuracy   :	0.971	(9708/10000)		Val loss :	0.1056


Mean log L2 = -5.957378387451172

Epoch 13 in 154.94 sec
Train accuracy :	0.98	(58805/60000)		Train loss :	0.0696
Val accuracy   :	0.966	(9656/10000)		Val loss :	0.1246


Mean log L2 = -5.965821743011475

Epoch 14 in 151.84 sec
Train accuracy :	0.988	(59282/60000)		Train loss :	0.0412
Val accuracy   :	0.975	(9748/10000)		Val loss :	0.0892


Mean log L2 = -5.960446834564209

Epoch 15 in 153.59 sec
Train accuracy :	0.984	(59061/60000)		Train loss :	0.0523
Val accuracy   :	0.969	(9688/10000)		Val loss :	0.1049


Mean log L2 = -5.963155746459961

Epoch 16 in 153.74 sec
Train accuracy :	0.986	(59148/60000)		Train loss :	0.0482
Val accuracy   :	0.97	(9701/10000)		Val loss :	0.1127


Mean log L2 = -5.97027063369751

Epoch 17 in 152.28 sec
Train accuracy :	0.985	(59088/60000)		Train loss :	0.052
Val accuracy   :	0.966	(9662/10000)		Val loss :	0.1228


Mean log L2 = -5.965728282928467

Epoch 18 in 152.06 sec
Train accuracy :	0.987	(59247/60000)		Train loss :	0.0439
Val accuracy   :	0.97	(9703/10000)		Val loss :	0.1085


Mean log L2 = -5.962732791900635

Epoch 19 in 153.07 sec
Train accuracy :	0.992	(59537/60000)		Train loss :	0.0287
Val accuracy   :	0.975	(9746/10000)		Val loss :	0.0892


Mean log L2 = -5.9688920974731445

Epoch 20 in 155.52 sec
Train accuracy :	0.993	(59590/60000)		Train loss :	0.0278
Val accuracy   :	0.976	(9761/10000)		Val loss :	0.0831


Mean log L2 = -5.9691996574401855

Epoch 21 in 152.56 sec
Train accuracy :	0.99	(59389/60000)		Train loss :	0.0349
Val accuracy   :	0.97	(9696/10000)		Val loss :	0.1023


Mean log L2 = -5.964709758758545

Epoch 22 in 154.64 sec
Train accuracy :	0.988	(59251/60000)		Train loss :	0.0432
Val accuracy   :	0.968	(9680/10000)		Val loss :	0.1137


Mean log L2 = -5.972742557525635

Epoch 23 in 154.58 sec
Train accuracy :	0.994	(59618/60000)		Train loss :	0.0248
Val accuracy   :	0.972	(9718/10000)		Val loss :	0.0999


Mean log L2 = -5.9718828201293945

Epoch 24 in 151.91 sec
Train accuracy :	0.982	(58946/60000)		Train loss :	0.0611
Val accuracy   :	0.964	(9638/10000)		Val loss :	0.1407


Mean log L2 = -5.963669776916504

Epoch 25 in 155.15 sec
Train accuracy :	0.979	(58727/60000)		Train loss :	0.0747
Val accuracy   :	0.961	(9611/10000)		Val loss :	0.1473


Mean log L2 = -5.969577312469482

Epoch 26 in 152.87 sec
Train accuracy :	0.993	(59576/60000)		Train loss :	0.0269
Val accuracy   :	0.971	(9712/10000)		Val loss :	0.0965


Mean log L2 = -5.9691362380981445

Epoch 27 in 154.18 sec
Train accuracy :	0.991	(59464/60000)		Train loss :	0.029
Val accuracy   :	0.972	(9723/10000)		Val loss :	0.1039


Mean log L2 = -5.96281623840332

Epoch 28 in 153.63 sec
Train accuracy :	0.995	(59670/60000)		Train loss :	0.0204
Val accuracy   :	0.974	(9736/10000)		Val loss :	0.0928


Mean log L2 = -5.977725505828857

Epoch 29 in 152.48 sec
Train accuracy :	0.992	(59531/60000)		Train loss :	0.0258
Val accuracy   :	0.969	(9691/10000)		Val loss :	0.1038


Mean log L2 = -5.9691386222839355

Epoch 30 in 154.42 sec
Train accuracy :	0.995	(59714/60000)		Train loss :	0.0182
Val accuracy   :	0.974	(9739/10000)		Val loss :	0.092


Mean log L2 = -5.968179702758789

Epoch 31 in 155.83 sec
Train accuracy :	0.986	(59150/60000)		Train loss :	0.046
Val accuracy   :	0.962	(9623/10000)		Val loss :	0.1409


Mean log L2 = -5.972001552581787

Epoch 32 in 153.20 sec
Train accuracy :	0.995	(59723/60000)		Train loss :	0.0177
Val accuracy   :	0.975	(9753/10000)		Val loss :	0.0878


Mean log L2 = -5.979154109954834

Epoch 33 in 151.67 sec
Train accuracy :	0.982	(58936/60000)		Train loss :	0.0608
Val accuracy   :	0.965	(9651/10000)		Val loss :	0.1297


Mean log L2 = -5.975188732147217

Epoch 34 in 148.99 sec
Train accuracy :	0.995	(59690/60000)		Train loss :	0.0186
Val accuracy   :	0.973	(9726/10000)		Val loss :	0.0958


Mean log L2 = -5.979342937469482

Epoch 35 in 152.91 sec
Train accuracy :	0.99	(59378/60000)		Train loss :	0.0365
Val accuracy   :	0.97	(9700/10000)		Val loss :	0.1067


Mean log L2 = -5.9775261878967285

Epoch 36 in 151.14 sec
Train accuracy :	0.995	(59695/60000)		Train loss :	0.0212
Val accuracy   :	0.973	(9727/10000)		Val loss :	0.1018


Mean log L2 = -5.982117652893066

Epoch 37 in 153.68 sec
Train accuracy :	0.997	(59814/60000)		Train loss :	0.0127
Val accuracy   :	0.978	(9776/10000)		Val loss :	0.0876


Mean log L2 = -5.978511333465576

Epoch 38 in 151.98 sec
Train accuracy :	0.997	(59825/60000)		Train loss :	0.0132
Val accuracy   :	0.978	(9778/10000)		Val loss :	0.0822


Mean log L2 = -5.970038414001465

Epoch 39 in 154.63 sec
Train accuracy :	0.994	(59638/60000)		Train loss :	0.0234
Val accuracy   :	0.973	(9734/10000)		Val loss :	0.1084


Mean log L2 = -5.983433723449707

Epoch 40 in 155.95 sec
Train accuracy :	0.996	(59734/60000)		Train loss :	0.0179
Val accuracy   :	0.976	(9763/10000)		Val loss :	0.0975


Mean log L2 = -5.970951557159424

Epoch 41 in 150.91 sec
Train accuracy :	0.999	(59929/60000)		Train loss :	0.0073
Val accuracy   :	0.978	(9781/10000)		Val loss :	0.0838


Mean log L2 = -5.980174541473389

Epoch 42 in 155.20 sec
Train accuracy :	0.998	(59882/60000)		Train loss :	0.0096
Val accuracy   :	0.977	(9770/10000)		Val loss :	0.0896


Mean log L2 = -5.978616714477539

Epoch 43 in 151.75 sec
Train accuracy :	0.998	(59895/60000)		Train loss :	0.0084
Val accuracy   :	0.978	(9777/10000)		Val loss :	0.0878


Mean log L2 = -5.977375507354736

Epoch 44 in 154.57 sec
Train accuracy :	0.997	(59838/60000)		Train loss :	0.0117
Val accuracy   :	0.977	(9770/10000)		Val loss :	0.0919


Mean log L2 = -5.979859828948975

Epoch 45 in 152.77 sec
Train accuracy :	0.993	(59568/60000)		Train loss :	0.0251
Val accuracy   :	0.971	(9714/10000)		Val loss :	0.1089


Mean log L2 = -5.970896244049072

Epoch 46 in 153.16 sec
Train accuracy :	0.993	(59595/60000)		Train loss :	0.0241
Val accuracy   :	0.972	(9717/10000)		Val loss :	0.1134


Mean log L2 = -5.975594520568848

Epoch 47 in 153.70 sec
Train accuracy :	0.997	(59791/60000)		Train loss :	0.013
Val accuracy   :	0.975	(9749/10000)		Val loss :	0.094


Mean log L2 = -5.968059062957764

Epoch 48 in 154.09 sec
Train accuracy :	0.992	(59495/60000)		Train loss :	0.0283
Val accuracy   :	0.967	(9669/10000)		Val loss :	0.1253


Mean log L2 = -5.977059364318848

Epoch 49 in 152.77 sec
Train accuracy :	0.995	(59703/60000)		Train loss :	0.0188
Val accuracy   :	0.971	(9712/10000)		Val loss :	0.1211


Mean log L2 = -5.979299545288086

Epoch 50 in 155.98 sec
Train accuracy :	0.998	(59901/60000)		Train loss :	0.0084
Val accuracy   :	0.977	(9766/10000)		Val loss :	0.0876
