# Supplementary material
Source: ML conference proceedings conference paper supplement (https://proceedings.neurips.cc/paper_files/paper/2022/hash/545a114e655f9d25ba0d56ea9a01fc6e-Abstract.html)
Supplement: Supplementary file 1 [file 545a114e655f9d25ba0d56ea9a01fc6e-Supplemental-Conference.zip › revised_supplemental/code/results/table1/no_noise/classic_ep_4e-1/2022-08-01_18-22-13_xp_mlp_2h256_ep1_beta4e-1_noise0_run3/log.txt]

python train.py simus/train/xp_mlp_ep1_run3.json

Mean log L2 = -5.952755928039551

Epoch 1 in 260.39 sec
Train accuracy :	0.949	(56964/60000)		Train loss :	0.1769
Val accuracy   :	0.945	(9450/10000)		Val loss :	0.1898


Mean log L2 = -5.957303524017334

Epoch 2 in 116.50 sec
Train accuracy :	0.95	(56982/60000)		Train loss :	0.1662
Val accuracy   :	0.942	(9416/10000)		Val loss :	0.1904


Mean log L2 = -5.953977108001709

Epoch 3 in 109.11 sec
Train accuracy :	0.951	(57072/60000)		Train loss :	0.1647
Val accuracy   :	0.945	(9448/10000)		Val loss :	0.1895


Mean log L2 = -5.951697826385498

Epoch 4 in 108.86 sec
Train accuracy :	0.972	(58290/60000)		Train loss :	0.0989
Val accuracy   :	0.961	(9606/10000)		Val loss :	0.1388


Mean log L2 = -5.950250148773193

Epoch 5 in 108.51 sec
Train accuracy :	0.971	(58276/60000)		Train loss :	0.0976
Val accuracy   :	0.962	(9619/10000)		Val loss :	0.1371


Mean log L2 = -5.954890251159668

Epoch 6 in 117.28 sec
Train accuracy :	0.975	(58511/60000)		Train loss :	0.0853
Val accuracy   :	0.964	(9638/10000)		Val loss :	0.126


Mean log L2 = -5.955265998840332

Epoch 7 in 108.82 sec
Train accuracy :	0.978	(58677/60000)		Train loss :	0.0742
Val accuracy   :	0.966	(9658/10000)		Val loss :	0.1179


Mean log L2 = -5.954970836639404

Epoch 8 in 109.04 sec
Train accuracy :	0.983	(58968/60000)		Train loss :	0.0602
Val accuracy   :	0.968	(9675/10000)		Val loss :	0.1118


Mean log L2 = -5.953683376312256

Epoch 9 in 108.85 sec
Train accuracy :	0.98	(58813/60000)		Train loss :	0.0683
Val accuracy   :	0.965	(9647/10000)		Val loss :	0.1223


Mean log L2 = -5.955777645111084

Epoch 10 in 109.11 sec
Train accuracy :	0.985	(59116/60000)		Train loss :	0.0526
Val accuracy   :	0.97	(9703/10000)		Val loss :	0.1011


Mean log L2 = -5.960286617279053

Epoch 11 in 109.45 sec
Train accuracy :	0.982	(58933/60000)		Train loss :	0.0614
Val accuracy   :	0.967	(9665/10000)		Val loss :	0.1176


Mean log L2 = -5.967357158660889

Epoch 12 in 109.19 sec
Train accuracy :	0.988	(59271/60000)		Train loss :	0.0437
Val accuracy   :	0.973	(9726/10000)		Val loss :	0.0951


Mean log L2 = -5.957945346832275

Epoch 13 in 108.93 sec
Train accuracy :	0.98	(58828/60000)		Train loss :	0.0654
Val accuracy   :	0.964	(9644/10000)		Val loss :	0.1197


Mean log L2 = -5.962674617767334

Epoch 14 in 109.24 sec
Train accuracy :	0.982	(58939/60000)		Train loss :	0.0569
Val accuracy   :	0.967	(9671/10000)		Val loss :	0.1149


Mean log L2 = -5.9672393798828125

Epoch 15 in 109.34 sec
Train accuracy :	0.988	(59267/60000)		Train loss :	0.0432
Val accuracy   :	0.971	(9713/10000)		Val loss :	0.0973


Mean log L2 = -5.962086200714111

Epoch 16 in 109.15 sec
Train accuracy :	0.974	(58411/60000)		Train loss :	0.0977
Val accuracy   :	0.957	(9567/10000)		Val loss :	0.1693


Mean log L2 = -5.966056823730469

Epoch 17 in 109.02 sec
Train accuracy :	0.986	(59188/60000)		Train loss :	0.0459
Val accuracy   :	0.969	(9694/10000)		Val loss :	0.1037


Mean log L2 = -5.964527130126953

Epoch 18 in 109.30 sec
Train accuracy :	0.977	(58608/60000)		Train loss :	0.0764
Val accuracy   :	0.96	(9596/10000)		Val loss :	0.1337


Mean log L2 = -5.965129375457764

Epoch 19 in 109.30 sec
Train accuracy :	0.979	(58713/60000)		Train loss :	0.0826
Val accuracy   :	0.965	(9647/10000)		Val loss :	0.1287


Mean log L2 = -5.9645514488220215

Epoch 20 in 109.00 sec
Train accuracy :	0.991	(59477/60000)		Train loss :	0.0304
Val accuracy   :	0.972	(9715/10000)		Val loss :	0.1025


Mean log L2 = -5.960278511047363

Epoch 21 in 108.87 sec
Train accuracy :	0.992	(59515/60000)		Train loss :	0.031
Val accuracy   :	0.973	(9733/10000)		Val loss :	0.0933


Mean log L2 = -5.9675822257995605

Epoch 22 in 109.23 sec
Train accuracy :	0.992	(59500/60000)		Train loss :	0.0307
Val accuracy   :	0.975	(9748/10000)		Val loss :	0.0955


Mean log L2 = -5.965001106262207

Epoch 23 in 109.17 sec
Train accuracy :	0.985	(59124/60000)		Train loss :	0.0502
Val accuracy   :	0.967	(9673/10000)		Val loss :	0.1128


Mean log L2 = -5.975219249725342

Epoch 24 in 109.19 sec
Train accuracy :	0.991	(59463/60000)		Train loss :	0.0314
Val accuracy   :	0.972	(9718/10000)		Val loss :	0.1019


Mean log L2 = -5.971863269805908

Epoch 25 in 108.51 sec
Train accuracy :	0.993	(59567/60000)		Train loss :	0.0264
Val accuracy   :	0.974	(9738/10000)		Val loss :	0.093


Mean log L2 = -5.9673285484313965

Epoch 26 in 109.04 sec
Train accuracy :	0.993	(59577/60000)		Train loss :	0.0267
Val accuracy   :	0.974	(9738/10000)		Val loss :	0.0958


Mean log L2 = -5.979140758514404

Epoch 27 in 109.44 sec
Train accuracy :	0.993	(59557/60000)		Train loss :	0.0272
Val accuracy   :	0.974	(9737/10000)		Val loss :	0.0934


Mean log L2 = -5.975039958953857

Epoch 28 in 109.08 sec
Train accuracy :	0.992	(59541/60000)		Train loss :	0.0277
Val accuracy   :	0.972	(9715/10000)		Val loss :	0.1


Mean log L2 = -5.974457740783691

Epoch 29 in 109.33 sec
Train accuracy :	0.986	(59138/60000)		Train loss :	0.0462
Val accuracy   :	0.969	(9688/10000)		Val loss :	0.1152


Mean log L2 = -5.969478607177734

Epoch 30 in 109.17 sec
Train accuracy :	0.948	(56856/60000)		Train loss :	0.207
Val accuracy   :	0.933	(9331/10000)		Val loss :	0.2753


Mean log L2 = -5.9795026779174805

Epoch 31 in 109.00 sec
Train accuracy :	0.994	(59614/60000)		Train loss :	0.0237
Val accuracy   :	0.973	(9727/10000)		Val loss :	0.1032


Mean log L2 = -5.972100257873535

Epoch 32 in 109.41 sec
Train accuracy :	0.994	(59631/60000)		Train loss :	0.022
Val accuracy   :	0.975	(9745/10000)		Val loss :	0.0928


Mean log L2 = -5.983700275421143

Epoch 33 in 109.06 sec
Train accuracy :	0.997	(59809/60000)		Train loss :	0.0142
Val accuracy   :	0.978	(9777/10000)		Val loss :	0.0842


Mean log L2 = -5.973673343658447

Epoch 34 in 109.05 sec
Train accuracy :	0.995	(59699/60000)		Train loss :	0.0184
Val accuracy   :	0.974	(9740/10000)		Val loss :	0.0912


Mean log L2 = -5.9784135818481445

Epoch 35 in 109.37 sec
Train accuracy :	0.992	(59531/60000)		Train loss :	0.027
Val accuracy   :	0.972	(9718/10000)		Val loss :	0.1054


Mean log L2 = -5.977176189422607

Epoch 36 in 108.99 sec
Train accuracy :	0.995	(59687/60000)		Train loss :	0.0186
Val accuracy   :	0.975	(9746/10000)		Val loss :	0.1048


Mean log L2 = -5.973344326019287

Epoch 37 in 109.09 sec
Train accuracy :	0.997	(59794/60000)		Train loss :	0.0131
Val accuracy   :	0.976	(9759/10000)		Val loss :	0.0917


Mean log L2 = -5.9849700927734375

Epoch 38 in 109.15 sec
Train accuracy :	0.997	(59843/60000)		Train loss :	0.0111
Val accuracy   :	0.977	(9768/10000)		Val loss :	0.0912


Mean log L2 = -5.976464748382568

Epoch 39 in 109.33 sec
Train accuracy :	0.99	(59420/60000)		Train loss :	0.0339
Val accuracy   :	0.971	(9714/10000)		Val loss :	0.1188


Mean log L2 = -5.974659442901611

Epoch 40 in 109.25 sec
Train accuracy :	0.991	(59479/60000)		Train loss :	0.0301
Val accuracy   :	0.97	(9700/10000)		Val loss :	0.1189


Mean log L2 = -5.9793477058410645

Epoch 41 in 109.33 sec
Train accuracy :	0.996	(59737/60000)		Train loss :	0.0159
Val accuracy   :	0.974	(9736/10000)		Val loss :	0.1008


Mean log L2 = -5.975570201873779

Epoch 42 in 108.91 sec
Train accuracy :	0.996	(59760/60000)		Train loss :	0.0165
Val accuracy   :	0.976	(9761/10000)		Val loss :	0.0924


Mean log L2 = -5.979350566864014

Epoch 43 in 109.30 sec
Train accuracy :	0.994	(59644/60000)		Train loss :	0.0213
Val accuracy   :	0.972	(9722/10000)		Val loss :	0.1043


Mean log L2 = -5.981044292449951

Epoch 44 in 108.65 sec
Train accuracy :	0.998	(59851/60000)		Train loss :	0.0104
Val accuracy   :	0.976	(9763/10000)		Val loss :	0.093


Mean log L2 = -5.973836421966553

Epoch 45 in 109.17 sec
Train accuracy :	0.996	(59775/60000)		Train loss :	0.015
Val accuracy   :	0.975	(9753/10000)		Val loss :	0.1038


Mean log L2 = -5.9723358154296875

Epoch 46 in 109.15 sec
Train accuracy :	0.985	(59106/60000)		Train loss :	0.0556
Val accuracy   :	0.965	(9647/10000)		Val loss :	0.1485


Mean log L2 = -5.981428146362305

Epoch 47 in 109.10 sec
Train accuracy :	0.998	(59851/60000)		Train loss :	0.01
Val accuracy   :	0.976	(9756/10000)		Val loss :	0.0948


Mean log L2 = -5.98353910446167

Epoch 48 in 108.88 sec
Train accuracy :	0.997	(59846/60000)		Train loss :	0.0105
Val accuracy   :	0.976	(9757/10000)		Val loss :	0.0962


Mean log L2 = -5.981370449066162

Epoch 49 in 109.06 sec
Train accuracy :	0.993	(59596/60000)		Train loss :	0.0229
Val accuracy   :	0.971	(9705/10000)		Val loss :	0.1193


Mean log L2 = -5.979104995727539

Epoch 50 in 109.03 sec
Train accuracy :	0.997	(59829/60000)		Train loss :	0.0123
Val accuracy   :	0.977	(9772/10000)		Val loss :	0.0909
