# Supplementary material
Source: ML conference proceedings conference paper supplement (https://proceedings.neurips.cc/paper_files/paper/2022/hash/545a114e655f9d25ba0d56ea9a01fc6e-Abstract.html)
Supplement: Supplementary file 1 [file 545a114e655f9d25ba0d56ea9a01fc6e-Supplemental-Conference.zip › revised_supplemental/code/results/table1/no_noise/classic_ep_old/2022-05-18_14-33-21_xp_mlp_2h256_ep1_beta4e-1_noise0_run1/log.txt]

python train.py simus/ep/mlp/mnist_runs/no_noise/classic_ep_run1.json

Mean log L2 = -5.882894039154053

Epoch 1 in 397.03 sec
Train accuracy :	0.895	(53724/60000)		Train loss :	0.3512
Val accuracy   :	0.89	(8903/10000)		Val loss :	0.3698


Mean log L2 = -5.878310680389404

Epoch 2 in 31.06 sec
Train accuracy :	0.947	(56843/60000)		Train loss :	0.1831
Val accuracy   :	0.94	(9401/10000)		Val loss :	0.2087


Mean log L2 = -5.863868713378906

Epoch 3 in 30.82 sec
Train accuracy :	0.967	(58040/60000)		Train loss :	0.1125
Val accuracy   :	0.959	(9588/10000)		Val loss :	0.145


Mean log L2 = -5.861745357513428

Epoch 4 in 30.90 sec
Train accuracy :	0.959	(57525/60000)		Train loss :	0.1405
Val accuracy   :	0.951	(9512/10000)		Val loss :	0.171


Mean log L2 = -5.849542140960693

Epoch 5 in 30.96 sec
Train accuracy :	0.978	(58669/60000)		Train loss :	0.0751
Val accuracy   :	0.969	(9685/10000)		Val loss :	0.1103


Mean log L2 = -5.854101657867432

Epoch 6 in 30.81 sec
Train accuracy :	0.973	(58384/60000)		Train loss :	0.0919
Val accuracy   :	0.964	(9636/10000)		Val loss :	0.1295


Mean log L2 = -5.871219158172607

Epoch 7 in 31.69 sec
Train accuracy :	0.978	(58696/60000)		Train loss :	0.0771
Val accuracy   :	0.967	(9672/10000)		Val loss :	0.1203


Mean log L2 = -5.833745956420898

Epoch 8 in 30.91 sec
Train accuracy :	0.981	(58848/60000)		Train loss :	0.0654
Val accuracy   :	0.97	(9695/10000)		Val loss :	0.1049


Mean log L2 = -5.844585418701172

Epoch 9 in 31.23 sec
Train accuracy :	0.984	(59018/60000)		Train loss :	0.0585
Val accuracy   :	0.97	(9701/10000)		Val loss :	0.1081


Mean log L2 = -5.826026916503906

Epoch 10 in 33.10 sec
Train accuracy :	0.931	(55877/60000)		Train loss :	0.2305
Val accuracy   :	0.922	(9220/10000)		Val loss :	0.2772


Mean log L2 = -5.845569133758545

Epoch 11 in 32.12 sec
Train accuracy :	0.967	(57997/60000)		Train loss :	0.1146
Val accuracy   :	0.957	(9571/10000)		Val loss :	0.1578


Mean log L2 = -5.853768825531006

Epoch 12 in 31.63 sec
Train accuracy :	0.986	(59133/60000)		Train loss :	0.0508
Val accuracy   :	0.971	(9708/10000)		Val loss :	0.0995


Mean log L2 = -5.855897426605225

Epoch 13 in 31.47 sec
Train accuracy :	0.987	(59198/60000)		Train loss :	0.0473
Val accuracy   :	0.972	(9722/10000)		Val loss :	0.0984


Mean log L2 = -5.830108165740967

Epoch 14 in 31.19 sec
Train accuracy :	0.976	(58555/60000)		Train loss :	0.079
Val accuracy   :	0.963	(9631/10000)		Val loss :	0.1335


Mean log L2 = -5.8379106521606445

Epoch 15 in 32.56 sec
Train accuracy :	0.979	(58727/60000)		Train loss :	0.0726
Val accuracy   :	0.966	(9664/10000)		Val loss :	0.12


Mean log L2 = -5.831648349761963

Epoch 16 in 32.17 sec
Train accuracy :	0.987	(59232/60000)		Train loss :	0.0444
Val accuracy   :	0.971	(9712/10000)		Val loss :	0.1089


Mean log L2 = -5.839834690093994

Epoch 17 in 31.10 sec
Train accuracy :	0.989	(59360/60000)		Train loss :	0.0374
Val accuracy   :	0.974	(9742/10000)		Val loss :	0.0971


Mean log L2 = -5.826993465423584

Epoch 18 in 33.27 sec
Train accuracy :	0.988	(59281/60000)		Train loss :	0.0418
Val accuracy   :	0.969	(9691/10000)		Val loss :	0.1026


Mean log L2 = -5.83888053894043

Epoch 19 in 33.00 sec
Train accuracy :	0.981	(58842/60000)		Train loss :	0.0641
Val accuracy   :	0.965	(9653/10000)		Val loss :	0.121


Mean log L2 = -5.8375349044799805

Epoch 20 in 33.27 sec
Train accuracy :	0.99	(59386/60000)		Train loss :	0.0349
Val accuracy   :	0.97	(9698/10000)		Val loss :	0.1074


Mean log L2 = -5.871316432952881

Epoch 21 in 33.17 sec
Train accuracy :	0.988	(59300/60000)		Train loss :	0.04
Val accuracy   :	0.972	(9718/10000)		Val loss :	0.0958


Mean log L2 = -5.85437536239624

Epoch 22 in 32.64 sec
Train accuracy :	0.991	(59453/60000)		Train loss :	0.0341
Val accuracy   :	0.973	(9728/10000)		Val loss :	0.1067


Mean log L2 = -5.835014343261719

Epoch 23 in 32.58 sec
Train accuracy :	0.994	(59635/60000)		Train loss :	0.0238
Val accuracy   :	0.975	(9754/10000)		Val loss :	0.0844


Mean log L2 = -5.843595027923584

Epoch 24 in 33.62 sec
Train accuracy :	0.994	(59661/60000)		Train loss :	0.0228
Val accuracy   :	0.974	(9741/10000)		Val loss :	0.0916


Mean log L2 = -5.82966423034668

Epoch 25 in 32.50 sec
Train accuracy :	0.99	(59404/60000)		Train loss :	0.0359
Val accuracy   :	0.969	(9690/10000)		Val loss :	0.1102


Mean log L2 = -5.822782039642334

Epoch 26 in 32.60 sec
Train accuracy :	0.993	(59581/60000)		Train loss :	0.0249
Val accuracy   :	0.976	(9756/10000)		Val loss :	0.0904


Mean log L2 = -5.840022087097168

Epoch 27 in 32.05 sec
Train accuracy :	0.994	(59615/60000)		Train loss :	0.0223
Val accuracy   :	0.974	(9739/10000)		Val loss :	0.0992


Mean log L2 = -5.816176891326904

Epoch 28 in 32.99 sec
Train accuracy :	0.993	(59590/60000)		Train loss :	0.0235
Val accuracy   :	0.973	(9732/10000)		Val loss :	0.0981


Mean log L2 = -5.835737228393555

Epoch 29 in 31.44 sec
Train accuracy :	0.989	(59317/60000)		Train loss :	0.0444
Val accuracy   :	0.968	(9680/10000)		Val loss :	0.1346


Mean log L2 = -5.804002285003662

Epoch 30 in 31.83 sec
Train accuracy :	0.994	(59625/60000)		Train loss :	0.0244
Val accuracy   :	0.976	(9764/10000)		Val loss :	0.0893


Mean log L2 = -5.751075267791748

Epoch 31 in 31.59 sec
Train accuracy :	0.991	(59467/60000)		Train loss :	0.034
Val accuracy   :	0.969	(9690/10000)		Val loss :	0.1265


Mean log L2 = -5.810582637786865

Epoch 32 in 31.95 sec
Train accuracy :	0.991	(59473/60000)		Train loss :	0.0311
Val accuracy   :	0.971	(9714/10000)		Val loss :	0.114


Mean log L2 = -5.813169002532959

Epoch 33 in 32.14 sec
Train accuracy :	0.989	(59317/60000)		Train loss :	0.0359
Val accuracy   :	0.969	(9685/10000)		Val loss :	0.1167


Mean log L2 = -5.8282790184021

Epoch 34 in 32.21 sec
Train accuracy :	0.991	(59476/60000)		Train loss :	0.0291
Val accuracy   :	0.971	(9708/10000)		Val loss :	0.1092


Mean log L2 = -5.820204734802246

Epoch 35 in 32.31 sec
Train accuracy :	0.996	(59743/60000)		Train loss :	0.017
Val accuracy   :	0.974	(9737/10000)		Val loss :	0.0916


Mean log L2 = -5.825143337249756

Epoch 36 in 32.70 sec
Train accuracy :	0.996	(59732/60000)		Train loss :	0.0167
Val accuracy   :	0.975	(9750/10000)		Val loss :	0.1008


Mean log L2 = -5.825432300567627

Epoch 37 in 33.33 sec
Train accuracy :	0.997	(59818/60000)		Train loss :	0.0146
Val accuracy   :	0.975	(9749/10000)		Val loss :	0.0937


Mean log L2 = -5.813028812408447

Epoch 38 in 31.76 sec
Train accuracy :	0.998	(59888/60000)		Train loss :	0.0102
Val accuracy   :	0.976	(9764/10000)		Val loss :	0.0886


Mean log L2 = -5.707885265350342

Epoch 39 in 31.82 sec
Train accuracy :	0.995	(59717/60000)		Train loss :	0.0174
Val accuracy   :	0.974	(9735/10000)		Val loss :	0.105


Mean log L2 = -5.80918025970459

Epoch 40 in 32.31 sec
Train accuracy :	0.991	(59460/60000)		Train loss :	0.0316
Val accuracy   :	0.969	(9693/10000)		Val loss :	0.1143


Mean log L2 = -5.796969413757324

Epoch 41 in 31.22 sec
Train accuracy :	0.995	(59695/60000)		Train loss :	0.0194
Val accuracy   :	0.974	(9744/10000)		Val loss :	0.1071


Mean log L2 = -5.808257579803467

Epoch 42 in 31.65 sec
Train accuracy :	0.992	(59542/60000)		Train loss :	0.0268
Val accuracy   :	0.971	(9706/10000)		Val loss :	0.1158


Mean log L2 = -5.808925628662109

Epoch 43 in 31.84 sec
Train accuracy :	0.995	(59706/60000)		Train loss :	0.0176
Val accuracy   :	0.973	(9732/10000)		Val loss :	0.1079


Mean log L2 = -5.826965808868408

Epoch 44 in 32.62 sec
Train accuracy :	0.995	(59720/60000)		Train loss :	0.0181
Val accuracy   :	0.973	(9730/10000)		Val loss :	0.1071


Mean log L2 = -5.781148910522461

Epoch 45 in 32.37 sec
Train accuracy :	0.999	(59934/60000)		Train loss :	0.0058
Val accuracy   :	0.978	(9782/10000)		Val loss :	0.0946


Mean log L2 = -5.824388027191162

Epoch 46 in 32.65 sec
Train accuracy :	0.997	(59800/60000)		Train loss :	0.0131
Val accuracy   :	0.975	(9745/10000)		Val loss :	0.1008


Mean log L2 = -5.811387538909912

Epoch 47 in 31.86 sec
Train accuracy :	0.988	(59298/60000)		Train loss :	0.0386
Val accuracy   :	0.967	(9667/10000)		Val loss :	0.1309


Mean log L2 = -5.79941987991333

Epoch 48 in 33.52 sec
Train accuracy :	0.998	(59880/60000)		Train loss :	0.0089
Val accuracy   :	0.976	(9760/10000)		Val loss :	0.0995


Mean log L2 = -5.807652473449707

Epoch 49 in 32.30 sec
Train accuracy :	0.998	(59907/60000)		Train loss :	0.0073
Val accuracy   :	0.977	(9767/10000)		Val loss :	0.0934


Mean log L2 = -5.8058648109436035

Epoch 50 in 32.48 sec
Train accuracy :	0.998	(59906/60000)		Train loss :	0.0074
Val accuracy   :	0.977	(9770/10000)		Val loss :	0.0894
