# Supplementary material
Source: ML conference proceedings conference paper supplement (https://proceedings.neurips.cc/paper_files/paper/2022/hash/545a114e655f9d25ba0d56ea9a01fc6e-Abstract.html)
Supplement: Supplementary file 1 [file 545a114e655f9d25ba0d56ea9a01fc6e-Supplemental-Conference.zip › revised_supplemental/code/results/table1/no_noise/classic_ep_old/2022-05-18_14-34-30_xp_mlp_2h256_ep1_beta4e-1_noise0_run2/log.txt]

python train.py simus/ep/mlp/mnist_runs/no_noise/classic_ep_run2.json

Mean log L2 = -5.949611663818359

Epoch 1 in 90.78 sec
Train accuracy :	0.934	(56033/60000)		Train loss :	0.2192
Val accuracy   :	0.934	(9336/10000)		Val loss :	0.229


Mean log L2 = -5.943750381469727

Epoch 2 in 60.91 sec
Train accuracy :	0.965	(57906/60000)		Train loss :	0.1213
Val accuracy   :	0.963	(9625/10000)		Val loss :	0.1381


Mean log L2 = -5.9468092918396

Epoch 3 in 61.15 sec
Train accuracy :	0.971	(58287/60000)		Train loss :	0.098
Val accuracy   :	0.964	(9636/10000)		Val loss :	0.1275


Mean log L2 = -5.952117919921875

Epoch 4 in 81.94 sec
Train accuracy :	0.962	(57729/60000)		Train loss :	0.1267
Val accuracy   :	0.956	(9562/10000)		Val loss :	0.1545


Mean log L2 = -5.945399761199951

Epoch 5 in 61.03 sec
Train accuracy :	0.975	(58498/60000)		Train loss :	0.085
Val accuracy   :	0.966	(9664/10000)		Val loss :	0.1162


Mean log L2 = -5.957068920135498

Epoch 6 in 58.96 sec
Train accuracy :	0.975	(58501/60000)		Train loss :	0.0848
Val accuracy   :	0.967	(9668/10000)		Val loss :	0.1168


Mean log L2 = -5.955337047576904

Epoch 7 in 52.37 sec
Train accuracy :	0.97	(58205/60000)		Train loss :	0.1018
Val accuracy   :	0.959	(9592/10000)		Val loss :	0.1432


Mean log L2 = -5.95306921005249

Epoch 8 in 52.58 sec
Train accuracy :	0.985	(59092/60000)		Train loss :	0.0525
Val accuracy   :	0.972	(9719/10000)		Val loss :	0.0984


Mean log L2 = -5.955125331878662

Epoch 9 in 52.97 sec
Train accuracy :	0.985	(59093/60000)		Train loss :	0.0534
Val accuracy   :	0.972	(9722/10000)		Val loss :	0.0997


Mean log L2 = -5.959334850311279

Epoch 10 in 52.70 sec
Train accuracy :	0.979	(58742/60000)		Train loss :	0.0701
Val accuracy   :	0.965	(9646/10000)		Val loss :	0.1195


Mean log L2 = -5.964047908782959

Epoch 11 in 53.04 sec
Train accuracy :	0.985	(59113/60000)		Train loss :	0.05
Val accuracy   :	0.97	(9701/10000)		Val loss :	0.1099


Mean log L2 = -5.962724208831787

Epoch 12 in 53.31 sec
Train accuracy :	0.983	(59001/60000)		Train loss :	0.058
Val accuracy   :	0.968	(9682/10000)		Val loss :	0.1131


Mean log L2 = -5.957646369934082

Epoch 13 in 53.14 sec
Train accuracy :	0.982	(58942/60000)		Train loss :	0.0628
Val accuracy   :	0.967	(9668/10000)		Val loss :	0.1234


Mean log L2 = -5.958859920501709

Epoch 14 in 52.78 sec
Train accuracy :	0.982	(58923/60000)		Train loss :	0.0597
Val accuracy   :	0.969	(9688/10000)		Val loss :	0.1079


Mean log L2 = -5.958906173706055

Epoch 15 in 52.40 sec
Train accuracy :	0.987	(59204/60000)		Train loss :	0.0469
Val accuracy   :	0.972	(9718/10000)		Val loss :	0.1053


Mean log L2 = -5.962808132171631

Epoch 16 in 52.79 sec
Train accuracy :	0.985	(59092/60000)		Train loss :	0.0524
Val accuracy   :	0.969	(9692/10000)		Val loss :	0.1122


Mean log L2 = -5.972112655639648

Epoch 17 in 52.78 sec
Train accuracy :	0.986	(59133/60000)		Train loss :	0.0481
Val accuracy   :	0.97	(9701/10000)		Val loss :	0.1049


Mean log L2 = -5.972166538238525

Epoch 18 in 52.52 sec
Train accuracy :	0.99	(59401/60000)		Train loss :	0.0357
Val accuracy   :	0.97	(9700/10000)		Val loss :	0.1068


Mean log L2 = -5.965054035186768

Epoch 19 in 52.83 sec
Train accuracy :	0.993	(59565/60000)		Train loss :	0.0264
Val accuracy   :	0.974	(9737/10000)		Val loss :	0.0959


Mean log L2 = -5.967411041259766

Epoch 20 in 53.31 sec
Train accuracy :	0.989	(59333/60000)		Train loss :	0.0387
Val accuracy   :	0.971	(9711/10000)		Val loss :	0.1038


Mean log L2 = -5.970956325531006

Epoch 21 in 53.16 sec
Train accuracy :	0.987	(59206/60000)		Train loss :	0.0438
Val accuracy   :	0.968	(9681/10000)		Val loss :	0.1124


Mean log L2 = -5.962442874908447

Epoch 22 in 53.50 sec
Train accuracy :	0.989	(59341/60000)		Train loss :	0.0397
Val accuracy   :	0.972	(9716/10000)		Val loss :	0.1089


Mean log L2 = -5.964059352874756

Epoch 23 in 52.67 sec
Train accuracy :	0.995	(59672/60000)		Train loss :	0.0218
Val accuracy   :	0.974	(9737/10000)		Val loss :	0.0977


Mean log L2 = -5.9794230461120605

Epoch 24 in 52.89 sec
Train accuracy :	0.99	(59388/60000)		Train loss :	0.036
Val accuracy   :	0.969	(9692/10000)		Val loss :	0.1187


Mean log L2 = -5.9735426902771

Epoch 25 in 48.55 sec
Train accuracy :	0.99	(59395/60000)		Train loss :	0.0344
Val accuracy   :	0.971	(9706/10000)		Val loss :	0.1047


Mean log L2 = -5.973423480987549

Epoch 26 in 47.89 sec
Train accuracy :	0.992	(59495/60000)		Train loss :	0.0309
Val accuracy   :	0.971	(9713/10000)		Val loss :	0.105


Mean log L2 = -5.972416877746582

Epoch 27 in 48.26 sec
Train accuracy :	0.99	(59387/60000)		Train loss :	0.0357
Val accuracy   :	0.972	(9720/10000)		Val loss :	0.1114


Mean log L2 = -5.968261241912842

Epoch 28 in 47.73 sec
Train accuracy :	0.995	(59699/60000)		Train loss :	0.0198
Val accuracy   :	0.975	(9752/10000)		Val loss :	0.0915


Mean log L2 = -5.978509426116943

Epoch 29 in 47.85 sec
Train accuracy :	0.996	(59733/60000)		Train loss :	0.0174
Val accuracy   :	0.977	(9768/10000)		Val loss :	0.0883


Mean log L2 = -5.975146770477295

Epoch 30 in 47.89 sec
Train accuracy :	0.996	(59731/60000)		Train loss :	0.0168
Val accuracy   :	0.974	(9739/10000)		Val loss :	0.0984


Mean log L2 = -5.973016262054443

Epoch 31 in 47.46 sec
Train accuracy :	0.993	(59579/60000)		Train loss :	0.0242
Val accuracy   :	0.972	(9720/10000)		Val loss :	0.1082


Mean log L2 = -5.972047328948975

Epoch 32 in 48.21 sec
Train accuracy :	0.986	(59159/60000)		Train loss :	0.0495
Val accuracy   :	0.966	(9661/10000)		Val loss :	0.1309


Mean log L2 = -5.97124719619751

Epoch 33 in 48.84 sec
Train accuracy :	0.987	(59215/60000)		Train loss :	0.0452
Val accuracy   :	0.97	(9697/10000)		Val loss :	0.1209


Mean log L2 = -5.967991828918457

Epoch 34 in 49.44 sec
Train accuracy :	0.998	(59859/60000)		Train loss :	0.0118
Val accuracy   :	0.977	(9773/10000)		Val loss :	0.0875


Mean log L2 = -5.977437496185303

Epoch 35 in 48.15 sec
Train accuracy :	0.998	(59855/60000)		Train loss :	0.0112
Val accuracy   :	0.976	(9761/10000)		Val loss :	0.0873


Mean log L2 = -5.978934288024902

Epoch 36 in 50.53 sec
Train accuracy :	0.998	(59857/60000)		Train loss :	0.0111
Val accuracy   :	0.977	(9766/10000)		Val loss :	0.0919


Mean log L2 = -5.975958347320557

Epoch 37 in 50.76 sec
Train accuracy :	0.996	(59772/60000)		Train loss :	0.0157
Val accuracy   :	0.974	(9742/10000)		Val loss :	0.1045


Mean log L2 = -5.974079132080078

Epoch 38 in 49.69 sec
Train accuracy :	0.995	(59696/60000)		Train loss :	0.0182
Val accuracy   :	0.974	(9738/10000)		Val loss :	0.106


Mean log L2 = -5.974461555480957

Epoch 39 in 49.97 sec
Train accuracy :	0.997	(59823/60000)		Train loss :	0.0126
Val accuracy   :	0.976	(9758/10000)		Val loss :	0.0945


Mean log L2 = -5.97737455368042

Epoch 40 in 49.90 sec
Train accuracy :	0.996	(59778/60000)		Train loss :	0.0147
Val accuracy   :	0.975	(9751/10000)		Val loss :	0.0969


Mean log L2 = -5.970413684844971

Epoch 41 in 50.28 sec
Train accuracy :	0.996	(59737/60000)		Train loss :	0.0159
Val accuracy   :	0.974	(9739/10000)		Val loss :	0.1013


Mean log L2 = -5.9786763191223145

Epoch 42 in 49.83 sec
Train accuracy :	0.998	(59863/60000)		Train loss :	0.0109
Val accuracy   :	0.974	(9743/10000)		Val loss :	0.1002


Mean log L2 = -5.976686000823975

Epoch 43 in 49.99 sec
Train accuracy :	0.995	(59723/60000)		Train loss :	0.0179
Val accuracy   :	0.975	(9748/10000)		Val loss :	0.0945


Mean log L2 = -5.974645137786865

Epoch 44 in 49.84 sec
Train accuracy :	0.99	(59397/60000)		Train loss :	0.0355
Val accuracy   :	0.97	(9697/10000)		Val loss :	0.1307


Mean log L2 = -5.981723308563232

Epoch 45 in 53.12 sec
Train accuracy :	0.994	(59612/60000)		Train loss :	0.0222
Val accuracy   :	0.973	(9726/10000)		Val loss :	0.1151


Mean log L2 = -5.979201793670654

Epoch 46 in 54.08 sec
Train accuracy :	0.997	(59828/60000)		Train loss :	0.0114
Val accuracy   :	0.974	(9740/10000)		Val loss :	0.1038


Mean log L2 = -5.97145414352417

Epoch 47 in 51.95 sec
Train accuracy :	0.998	(59886/60000)		Train loss :	0.0087
Val accuracy   :	0.977	(9765/10000)		Val loss :	0.096


Mean log L2 = -5.9759745597839355

Epoch 48 in 53.64 sec
Train accuracy :	0.997	(59819/60000)		Train loss :	0.0123
Val accuracy   :	0.975	(9745/10000)		Val loss :	0.095


Mean log L2 = -5.983619213104248

Epoch 49 in 52.57 sec
Train accuracy :	0.995	(59708/60000)		Train loss :	0.018
Val accuracy   :	0.974	(9744/10000)		Val loss :	0.104


Mean log L2 = -5.9791579246521

Epoch 50 in 49.49 sec
Train accuracy :	0.996	(59784/60000)		Train loss :	0.0142
Val accuracy   :	0.974	(9742/10000)		Val loss :	0.105
