# Supplementary material
Source: ML conference proceedings conference paper supplement (https://proceedings.neurips.cc/paper_files/paper/2022/hash/545a114e655f9d25ba0d56ea9a01fc6e-Abstract.html)
Supplement: Supplementary file 1 [file 545a114e655f9d25ba0d56ea9a01fc6e-Supplemental-Conference.zip › revised_supplemental/code/results/table1/no_noise/classic_ep_old/2022-05-18_14-39-05_xp_mlp_2h256_ep1_beta4e-1_noise0_run3/log.txt]

python train.py simus/ep/mlp/mnist_runs/no_noise/classic_ep_run3.json

Mean log L2 = -5.8827900886535645

Epoch 1 in 407.31 sec
Train accuracy :	0.944	(56621/60000)		Train loss :	0.1934
Val accuracy   :	0.942	(9417/10000)		Val loss :	0.1985


Mean log L2 = -5.8791093826293945

Epoch 2 in 33.39 sec
Train accuracy :	0.948	(56854/60000)		Train loss :	0.1724
Val accuracy   :	0.941	(9410/10000)		Val loss :	0.1985


Mean log L2 = -5.855325222015381

Epoch 3 in 32.81 sec
Train accuracy :	0.966	(57931/60000)		Train loss :	0.119
Val accuracy   :	0.961	(9608/10000)		Val loss :	0.1456


Mean log L2 = -5.856128692626953

Epoch 4 in 32.80 sec
Train accuracy :	0.973	(58383/60000)		Train loss :	0.0948
Val accuracy   :	0.965	(9653/10000)		Val loss :	0.1226


Mean log L2 = -5.85647439956665

Epoch 5 in 31.71 sec
Train accuracy :	0.953	(57202/60000)		Train loss :	0.1524
Val accuracy   :	0.947	(9467/10000)		Val loss :	0.1889


Mean log L2 = -5.841556549072266

Epoch 6 in 32.53 sec
Train accuracy :	0.977	(58628/60000)		Train loss :	0.0777
Val accuracy   :	0.966	(9664/10000)		Val loss :	0.1156


Mean log L2 = -5.868298053741455

Epoch 7 in 32.43 sec
Train accuracy :	0.975	(58492/60000)		Train loss :	0.0877
Val accuracy   :	0.964	(9639/10000)		Val loss :	0.1313


Mean log L2 = -5.846621036529541

Epoch 8 in 32.25 sec
Train accuracy :	0.982	(58896/60000)		Train loss :	0.0636
Val accuracy   :	0.971	(9711/10000)		Val loss :	0.104


Mean log L2 = -5.855525493621826

Epoch 9 in 32.14 sec
Train accuracy :	0.983	(58998/60000)		Train loss :	0.0565
Val accuracy   :	0.97	(9697/10000)		Val loss :	0.1111


Mean log L2 = -5.811384201049805

Epoch 10 in 31.61 sec
Train accuracy :	0.982	(58911/60000)		Train loss :	0.0602
Val accuracy   :	0.97	(9698/10000)		Val loss :	0.1051


Mean log L2 = -5.829503536224365

Epoch 11 in 33.95 sec
Train accuracy :	0.979	(58769/60000)		Train loss :	0.0673
Val accuracy   :	0.964	(9641/10000)		Val loss :	0.1308


Mean log L2 = -5.838812351226807

Epoch 12 in 32.32 sec
Train accuracy :	0.983	(58967/60000)		Train loss :	0.0599
Val accuracy   :	0.967	(9670/10000)		Val loss :	0.1113


Mean log L2 = -5.838761329650879

Epoch 13 in 32.04 sec
Train accuracy :	0.985	(59089/60000)		Train loss :	0.0538
Val accuracy   :	0.971	(9708/10000)		Val loss :	0.1078


Mean log L2 = -5.85426139831543

Epoch 14 in 31.10 sec
Train accuracy :	0.985	(59071/60000)		Train loss :	0.0511
Val accuracy   :	0.971	(9707/10000)		Val loss :	0.1082


Mean log L2 = -5.83389139175415

Epoch 15 in 30.69 sec
Train accuracy :	0.983	(58975/60000)		Train loss :	0.0587
Val accuracy   :	0.967	(9672/10000)		Val loss :	0.1159


Mean log L2 = -5.840714931488037

Epoch 16 in 30.65 sec
Train accuracy :	0.983	(58977/60000)		Train loss :	0.0566
Val accuracy   :	0.966	(9661/10000)		Val loss :	0.1265


Mean log L2 = -5.830953598022461

Epoch 17 in 30.74 sec
Train accuracy :	0.982	(58943/60000)		Train loss :	0.0574
Val accuracy   :	0.968	(9676/10000)		Val loss :	0.1119


Mean log L2 = -5.845370292663574

Epoch 18 in 30.79 sec
Train accuracy :	0.98	(58806/60000)		Train loss :	0.0638
Val accuracy   :	0.964	(9640/10000)		Val loss :	0.1288


Mean log L2 = -5.828597068786621

Epoch 19 in 30.76 sec
Train accuracy :	0.992	(59512/60000)		Train loss :	0.0316
Val accuracy   :	0.975	(9749/10000)		Val loss :	0.0903


Mean log L2 = -5.850047588348389

Epoch 20 in 30.78 sec
Train accuracy :	0.987	(59195/60000)		Train loss :	0.0428
Val accuracy   :	0.968	(9681/10000)		Val loss :	0.1098


Mean log L2 = -5.856531620025635

Epoch 21 in 30.69 sec
Train accuracy :	0.992	(59497/60000)		Train loss :	0.0297
Val accuracy   :	0.974	(9738/10000)		Val loss :	0.0941


Mean log L2 = -5.832462787628174

Epoch 22 in 30.86 sec
Train accuracy :	0.989	(59362/60000)		Train loss :	0.0363
Val accuracy   :	0.97	(9696/10000)		Val loss :	0.1159


Mean log L2 = -5.832248210906982

Epoch 23 in 31.77 sec
Train accuracy :	0.985	(59092/60000)		Train loss :	0.0513
Val accuracy   :	0.968	(9681/10000)		Val loss :	0.1171


Mean log L2 = -5.823301792144775

Epoch 24 in 31.32 sec
Train accuracy :	0.991	(59449/60000)		Train loss :	0.0328
Val accuracy   :	0.972	(9722/10000)		Val loss :	0.1031


Mean log L2 = -5.8281378746032715

Epoch 25 in 34.25 sec
Train accuracy :	0.988	(59278/60000)		Train loss :	0.0458
Val accuracy   :	0.973	(9725/10000)		Val loss :	0.1017


Mean log L2 = -5.8546905517578125

Epoch 26 in 33.46 sec
Train accuracy :	0.99	(59424/60000)		Train loss :	0.0338
Val accuracy   :	0.973	(9725/10000)		Val loss :	0.107


Mean log L2 = -5.824676990509033

Epoch 27 in 33.47 sec
Train accuracy :	0.993	(59597/60000)		Train loss :	0.0253
Val accuracy   :	0.973	(9730/10000)		Val loss :	0.0973


Mean log L2 = -5.813390254974365

Epoch 28 in 34.50 sec
Train accuracy :	0.994	(59645/60000)		Train loss :	0.022
Val accuracy   :	0.973	(9726/10000)		Val loss :	0.0987


Mean log L2 = -5.806282043457031

Epoch 29 in 35.41 sec
Train accuracy :	0.992	(59549/60000)		Train loss :	0.0267
Val accuracy   :	0.973	(9725/10000)		Val loss :	0.0977


Mean log L2 = -5.831963062286377

Epoch 30 in 33.87 sec
Train accuracy :	0.995	(59725/60000)		Train loss :	0.0185
Val accuracy   :	0.973	(9732/10000)		Val loss :	0.1013


Mean log L2 = -5.828254699707031

Epoch 31 in 31.61 sec
Train accuracy :	0.996	(59767/60000)		Train loss :	0.0169
Val accuracy   :	0.974	(9742/10000)		Val loss :	0.0929


Mean log L2 = -5.830315113067627

Epoch 32 in 33.68 sec
Train accuracy :	0.989	(59367/60000)		Train loss :	0.0363
Val accuracy   :	0.969	(9689/10000)		Val loss :	0.1199


Mean log L2 = -5.817026138305664

Epoch 33 in 34.50 sec
Train accuracy :	0.994	(59666/60000)		Train loss :	0.021
Val accuracy   :	0.974	(9737/10000)		Val loss :	0.105


Mean log L2 = -5.810276985168457

Epoch 34 in 33.14 sec
Train accuracy :	0.993	(59595/60000)		Train loss :	0.0238
Val accuracy   :	0.972	(9716/10000)		Val loss :	0.1045


Mean log L2 = -5.836437702178955

Epoch 35 in 33.08 sec
Train accuracy :	0.996	(59764/60000)		Train loss :	0.0164
Val accuracy   :	0.973	(9728/10000)		Val loss :	0.1004


Mean log L2 = -5.824667453765869

Epoch 36 in 33.86 sec
Train accuracy :	0.993	(59609/60000)		Train loss :	0.0239
Val accuracy   :	0.974	(9735/10000)		Val loss :	0.1084


Mean log L2 = -5.834296226501465

Epoch 37 in 34.59 sec
Train accuracy :	0.997	(59796/60000)		Train loss :	0.0144
Val accuracy   :	0.975	(9747/10000)		Val loss :	0.0961


Mean log L2 = -5.813029766082764

Epoch 38 in 32.52 sec
Train accuracy :	0.994	(59630/60000)		Train loss :	0.0228
Val accuracy   :	0.971	(9714/10000)		Val loss :	0.1126


Mean log L2 = -5.835134029388428

Epoch 39 in 32.11 sec
Train accuracy :	0.998	(59853/60000)		Train loss :	0.0104
Val accuracy   :	0.977	(9769/10000)		Val loss :	0.0921


Mean log L2 = -5.810911655426025

Epoch 40 in 32.54 sec
Train accuracy :	0.996	(59754/60000)		Train loss :	0.0172
Val accuracy   :	0.973	(9727/10000)		Val loss :	0.1128


Mean log L2 = -5.783284664154053

Epoch 41 in 33.15 sec
Train accuracy :	0.998	(59878/60000)		Train loss :	0.0092
Val accuracy   :	0.975	(9751/10000)		Val loss :	0.0967


Mean log L2 = -5.805093288421631

Epoch 42 in 31.95 sec
Train accuracy :	0.997	(59839/60000)		Train loss :	0.0111
Val accuracy   :	0.975	(9750/10000)		Val loss :	0.1063


Mean log L2 = -5.819249629974365

Epoch 43 in 32.53 sec
Train accuracy :	0.997	(59818/60000)		Train loss :	0.0126
Val accuracy   :	0.974	(9736/10000)		Val loss :	0.1077


Mean log L2 = -5.82033634185791

Epoch 44 in 30.61 sec
Train accuracy :	0.997	(59849/60000)		Train loss :	0.0106
Val accuracy   :	0.975	(9750/10000)		Val loss :	0.1064


Mean log L2 = -5.8206787109375

Epoch 45 in 32.62 sec
Train accuracy :	0.994	(59612/60000)		Train loss :	0.0231
Val accuracy   :	0.971	(9705/10000)		Val loss :	0.1281


Mean log L2 = -5.817875862121582

Epoch 46 in 32.13 sec
Train accuracy :	0.998	(59882/60000)		Train loss :	0.0104
Val accuracy   :	0.973	(9734/10000)		Val loss :	0.109


Mean log L2 = -5.821483135223389

Epoch 47 in 32.80 sec
Train accuracy :	0.999	(59915/60000)		Train loss :	0.0073
Val accuracy   :	0.976	(9764/10000)		Val loss :	0.0976


Mean log L2 = -5.683396339416504

Epoch 48 in 33.02 sec
Train accuracy :	0.987	(59195/60000)		Train loss :	0.0457
Val accuracy   :	0.961	(9612/10000)		Val loss :	0.1543


Mean log L2 = -5.8188581466674805

Epoch 49 in 31.04 sec
Train accuracy :	0.996	(59780/60000)		Train loss :	0.0149
Val accuracy   :	0.973	(9732/10000)		Val loss :	0.1088


Mean log L2 = -5.80507755279541

Epoch 50 in 30.57 sec
Train accuracy :	0.993	(59598/60000)		Train loss :	0.0245
Val accuracy   :	0.971	(9714/10000)		Val loss :	0.1194
