# Supplementary material
Source: ML conference proceedings conference paper supplement (https://proceedings.neurips.cc/paper_files/paper/2022/hash/545a114e655f9d25ba0d56ea9a01fc6e-Abstract.html)
Supplement: Supplementary file 1 [file 545a114e655f9d25ba0d56ea9a01fc6e-Supplemental-Conference.zip › revised_supplemental/code/results/table1/no_noise/continuous_hep/2022-05-18_18-40-08_xp_mlp_2h256_oscEP_N10_beta4e-1_noise0_run1/log.txt]

python train.py simus/ep/mlp/mnist_runs/no_noise/continuous_hep_run1.json

Mean log L2 = -4.174389362335205

Epoch 1 in 2348.08 sec
Train accuracy :	0.947	(56795/60000)		Train loss :	0.1895
Val accuracy   :	0.942	(9419/10000)		Val loss :	0.2016


Mean log L2 = -4.982065200805664

Epoch 2 in 963.32 sec
Train accuracy :	0.968	(58062/60000)		Train loss :	0.1198
Val accuracy   :	0.961	(9608/10000)		Val loss :	0.1452


Mean log L2 = -5.4065399169921875

Epoch 3 in 1002.23 sec
Train accuracy :	0.976	(58552/60000)		Train loss :	0.0911
Val accuracy   :	0.966	(9663/10000)		Val loss :	0.1209


Mean log L2 = -5.305342674255371

Epoch 4 in 1000.30 sec
Train accuracy :	0.97	(58195/60000)		Train loss :	0.1031
Val accuracy   :	0.961	(9609/10000)		Val loss :	0.1296


Mean log L2 = -5.393999099731445

Epoch 5 in 1004.26 sec
Train accuracy :	0.984	(59014/60000)		Train loss :	0.0633
Val accuracy   :	0.974	(9741/10000)		Val loss :	0.0922


Mean log L2 = -5.400808811187744

Epoch 6 in 1004.22 sec
Train accuracy :	0.981	(58871/60000)		Train loss :	0.0696
Val accuracy   :	0.968	(9677/10000)		Val loss :	0.1179


Mean log L2 = -5.090203762054443

Epoch 7 in 1001.32 sec
Train accuracy :	0.986	(59153/60000)		Train loss :	0.0528
Val accuracy   :	0.972	(9718/10000)		Val loss :	0.0967


Mean log L2 = -5.28000020980835

Epoch 8 in 1000.19 sec
Train accuracy :	0.989	(59321/60000)		Train loss :	0.0444
Val accuracy   :	0.972	(9722/10000)		Val loss :	0.102


Mean log L2 = -5.791199207305908

Epoch 9 in 1002.13 sec
Train accuracy :	0.992	(59504/60000)		Train loss :	0.0333
Val accuracy   :	0.975	(9753/10000)		Val loss :	0.0917


Mean log L2 = -4.571572780609131

Epoch 10 in 1001.14 sec
Train accuracy :	0.992	(59546/60000)		Train loss :	0.0315
Val accuracy   :	0.976	(9758/10000)		Val loss :	0.0889


Mean log L2 = -5.6203460693359375

Epoch 11 in 1001.83 sec
Train accuracy :	0.995	(59671/60000)		Train loss :	0.0248
Val accuracy   :	0.977	(9769/10000)		Val loss :	0.0891


Mean log L2 = -5.0245161056518555

Epoch 12 in 1001.09 sec
Train accuracy :	0.992	(59502/60000)		Train loss :	0.0337
Val accuracy   :	0.976	(9755/10000)		Val loss :	0.0943


Mean log L2 = -5.782233715057373

Epoch 13 in 1003.23 sec
Train accuracy :	0.995	(59700/60000)		Train loss :	0.0215
Val accuracy   :	0.975	(9750/10000)		Val loss :	0.0979


Mean log L2 = -5.738453388214111

Epoch 14 in 1006.58 sec
Train accuracy :	0.991	(59475/60000)		Train loss :	0.0367
Val accuracy   :	0.975	(9749/10000)		Val loss :	0.1001


Mean log L2 = -5.714128017425537

Epoch 15 in 1003.23 sec
Train accuracy :	0.997	(59801/60000)		Train loss :	0.0152
Val accuracy   :	0.978	(9782/10000)		Val loss :	0.094


Mean log L2 = -5.52006196975708

Epoch 16 in 1006.66 sec
Train accuracy :	0.997	(59814/60000)		Train loss :	0.0159
Val accuracy   :	0.977	(9769/10000)		Val loss :	0.0896


Mean log L2 = -5.678443431854248

Epoch 17 in 1006.55 sec
Train accuracy :	0.997	(59804/60000)		Train loss :	0.0152
Val accuracy   :	0.976	(9764/10000)		Val loss :	0.098


Mean log L2 = -5.657920837402344

Epoch 18 in 1004.93 sec
Train accuracy :	0.997	(59833/60000)		Train loss :	0.0144
Val accuracy   :	0.978	(9780/10000)		Val loss :	0.0947


Mean log L2 = -5.469516754150391

Epoch 19 in 1003.24 sec
Train accuracy :	0.998	(59872/60000)		Train loss :	0.0113
Val accuracy   :	0.977	(9767/10000)		Val loss :	0.0947


Mean log L2 = -5.765923023223877

Epoch 20 in 1002.14 sec
Train accuracy :	0.998	(59860/60000)		Train loss :	0.0118
Val accuracy   :	0.98	(9797/10000)		Val loss :	0.0901


Mean log L2 = -5.8293046951293945

Epoch 21 in 1001.97 sec
Train accuracy :	0.997	(59801/60000)		Train loss :	0.017
Val accuracy   :	0.976	(9760/10000)		Val loss :	0.1119


Mean log L2 = -5.445080757141113

Epoch 22 in 1001.91 sec
Train accuracy :	0.994	(59653/60000)		Train loss :	0.0297
Val accuracy   :	0.973	(9733/10000)		Val loss :	0.133


Mean log L2 = -5.890249729156494

Epoch 23 in 1002.44 sec
Train accuracy :	0.998	(59887/60000)		Train loss :	0.0107
Val accuracy   :	0.98	(9797/10000)		Val loss :	0.0919


Mean log L2 = -5.784337043762207

Epoch 24 in 1001.53 sec
Train accuracy :	0.996	(59750/60000)		Train loss :	0.0183
Val accuracy   :	0.977	(9772/10000)		Val loss :	0.0998


Mean log L2 = -5.629205703735352

Epoch 25 in 1001.97 sec
Train accuracy :	0.997	(59823/60000)		Train loss :	0.0155
Val accuracy   :	0.978	(9779/10000)		Val loss :	0.1122


Mean log L2 = -5.790111064910889

Epoch 26 in 1001.27 sec
Train accuracy :	0.997	(59792/60000)		Train loss :	0.0172
Val accuracy   :	0.975	(9753/10000)		Val loss :	0.1201


Mean log L2 = -5.8165435791015625

Epoch 27 in 1002.64 sec
Train accuracy :	0.998	(59899/60000)		Train loss :	0.0099
Val accuracy   :	0.978	(9783/10000)		Val loss :	0.1067


Mean log L2 = -5.686938762664795

Epoch 28 in 1002.34 sec
Train accuracy :	0.998	(59885/60000)		Train loss :	0.01
Val accuracy   :	0.976	(9763/10000)		Val loss :	0.1141


Mean log L2 = -5.51954460144043

Epoch 29 in 1002.88 sec
Train accuracy :	0.996	(59736/60000)		Train loss :	0.0208
Val accuracy   :	0.975	(9749/10000)		Val loss :	0.1161


Mean log L2 = -5.756880283355713

Epoch 30 in 1000.16 sec
Train accuracy :	0.998	(59883/60000)		Train loss :	0.0114
Val accuracy   :	0.978	(9779/10000)		Val loss :	0.1011


Mean log L2 = -5.501873970031738

Epoch 31 in 993.80 sec
Train accuracy :	0.995	(59717/60000)		Train loss :	0.0202
Val accuracy   :	0.975	(9753/10000)		Val loss :	0.1152


Mean log L2 = -5.514289379119873

Epoch 32 in 994.34 sec
Train accuracy :	0.997	(59804/60000)		Train loss :	0.0152
Val accuracy   :	0.975	(9749/10000)		Val loss :	0.127


Mean log L2 = -5.5248637199401855

Epoch 33 in 994.41 sec
Train accuracy :	0.999	(59920/60000)		Train loss :	0.0076
Val accuracy   :	0.978	(9780/10000)		Val loss :	0.1113


Mean log L2 = -5.7633585929870605

Epoch 34 in 993.28 sec
Train accuracy :	0.999	(59925/60000)		Train loss :	0.0078
Val accuracy   :	0.978	(9779/10000)		Val loss :	0.1176


Mean log L2 = -5.597843647003174

Epoch 35 in 992.78 sec
Train accuracy :	0.998	(59866/60000)		Train loss :	0.0105
Val accuracy   :	0.977	(9766/10000)		Val loss :	0.109


Mean log L2 = -5.890719413757324

Epoch 36 in 992.76 sec
Train accuracy :	0.999	(59933/60000)		Train loss :	0.0067
Val accuracy   :	0.976	(9760/10000)		Val loss :	0.119


Mean log L2 = -5.860186576843262

Epoch 37 in 991.73 sec
Train accuracy :	0.999	(59924/60000)		Train loss :	0.0073
Val accuracy   :	0.977	(9772/10000)		Val loss :	0.1101


Mean log L2 = -5.532107830047607

Epoch 38 in 992.38 sec
Train accuracy :	0.998	(59859/60000)		Train loss :	0.012
Val accuracy   :	0.975	(9752/10000)		Val loss :	0.1069


Mean log L2 = -5.252070426940918

Epoch 39 in 992.29 sec
Train accuracy :	0.992	(59496/60000)		Train loss :	0.0372
Val accuracy   :	0.969	(9689/10000)		Val loss :	0.1553


Mean log L2 = -5.845292568206787

Epoch 40 in 988.95 sec
Train accuracy :	0.999	(59929/60000)		Train loss :	0.0072
Val accuracy   :	0.978	(9781/10000)		Val loss :	0.1111


Mean log L2 = -5.733343601226807

Epoch 41 in 945.03 sec
Train accuracy :	0.996	(59759/60000)		Train loss :	0.0193
Val accuracy   :	0.974	(9744/10000)		Val loss :	0.1324


Mean log L2 = -5.746500492095947

Epoch 42 in 914.77 sec
Train accuracy :	0.999	(59914/60000)		Train loss :	0.0074
Val accuracy   :	0.977	(9765/10000)		Val loss :	0.1116


Mean log L2 = -5.8017754554748535

Epoch 43 in 915.01 sec
Train accuracy :	0.997	(59830/60000)		Train loss :	0.0146
Val accuracy   :	0.978	(9777/10000)		Val loss :	0.1115


Mean log L2 = -5.878442764282227

Epoch 44 in 915.59 sec
Train accuracy :	0.998	(59902/60000)		Train loss :	0.0081
Val accuracy   :	0.978	(9776/10000)		Val loss :	0.1036


Mean log L2 = -5.820619106292725

Epoch 45 in 914.73 sec
Train accuracy :	0.999	(59922/60000)		Train loss :	0.008
Val accuracy   :	0.979	(9785/10000)		Val loss :	0.1029


Mean log L2 = -5.832911491394043

Epoch 46 in 916.14 sec
Train accuracy :	0.998	(59894/60000)		Train loss :	0.0098
Val accuracy   :	0.977	(9768/10000)		Val loss :	0.1169


Mean log L2 = -5.828892707824707

Epoch 47 in 915.39 sec
Train accuracy :	0.998	(59881/60000)		Train loss :	0.0102
Val accuracy   :	0.978	(9784/10000)		Val loss :	0.1048


Mean log L2 = -5.87746524810791

Epoch 48 in 914.95 sec
Train accuracy :	0.998	(59893/60000)		Train loss :	0.0099
Val accuracy   :	0.978	(9778/10000)		Val loss :	0.1172


Mean log L2 = -5.521754741668701

Epoch 49 in 914.04 sec
Train accuracy :	0.996	(59743/60000)		Train loss :	0.0201
Val accuracy   :	0.974	(9739/10000)		Val loss :	0.1258


Mean log L2 = -5.559186935424805

Epoch 50 in 914.04 sec
Train accuracy :	0.998	(59902/60000)		Train loss :	0.0095
Val accuracy   :	0.977	(9768/10000)		Val loss :	0.1259
