# Supplementary material
Source: ML conference proceedings conference paper supplement (https://proceedings.neurips.cc/paper_files/paper/2022/hash/545a114e655f9d25ba0d56ea9a01fc6e-Abstract.html)
Supplement: Supplementary file 1 [file 545a114e655f9d25ba0d56ea9a01fc6e-Supplemental-Conference.zip › revised_supplemental/code/results/table1/no_noise/continuous_hep/2022-05-18_18-41-53_xp_mlp_2h256_oscEP_N10_beta4e-1_noise0_run2/log.txt]

python train.py simus/ep/mlp/mnist_runs/no_noise/continuous_hep_run2.json

Mean log L2 = -4.8670573234558105

Epoch 1 in 2831.68 sec
Train accuracy :	0.936	(56145/60000)		Train loss :	0.2284
Val accuracy   :	0.936	(9361/10000)		Val loss :	0.2365


Mean log L2 = -5.065382480621338

Epoch 2 in 956.39 sec
Train accuracy :	0.966	(57986/60000)		Train loss :	0.1219
Val accuracy   :	0.961	(9613/10000)		Val loss :	0.1412


Mean log L2 = -5.413868427276611

Epoch 3 in 952.29 sec
Train accuracy :	0.976	(58563/60000)		Train loss :	0.0876
Val accuracy   :	0.967	(9670/10000)		Val loss :	0.1191


Mean log L2 = -5.408854007720947

Epoch 4 in 956.61 sec
Train accuracy :	0.98	(58828/60000)		Train loss :	0.0726
Val accuracy   :	0.972	(9715/10000)		Val loss :	0.1019


Mean log L2 = -5.5974650382995605

Epoch 5 in 959.21 sec
Train accuracy :	0.986	(59155/60000)		Train loss :	0.057
Val accuracy   :	0.975	(9746/10000)		Val loss :	0.0911


Mean log L2 = -5.868958950042725

Epoch 6 in 958.74 sec
Train accuracy :	0.989	(59314/60000)		Train loss :	0.0458
Val accuracy   :	0.976	(9761/10000)		Val loss :	0.0873


Mean log L2 = -5.723861217498779

Epoch 7 in 956.12 sec
Train accuracy :	0.986	(59145/60000)		Train loss :	0.0557
Val accuracy   :	0.973	(9731/10000)		Val loss :	0.0979


Mean log L2 = -5.619220733642578

Epoch 8 in 962.78 sec
Train accuracy :	0.992	(59501/60000)		Train loss :	0.0337
Val accuracy   :	0.976	(9763/10000)		Val loss :	0.0893


Mean log L2 = -5.672348499298096

Epoch 9 in 962.85 sec
Train accuracy :	0.993	(59564/60000)		Train loss :	0.0311
Val accuracy   :	0.978	(9776/10000)		Val loss :	0.0832


Mean log L2 = -5.28988790512085

Epoch 10 in 965.65 sec
Train accuracy :	0.99	(59398/60000)		Train loss :	0.0374
Val accuracy   :	0.977	(9767/10000)		Val loss :	0.09


Mean log L2 = -5.807185173034668

Epoch 11 in 957.62 sec
Train accuracy :	0.995	(59684/60000)		Train loss :	0.0236
Val accuracy   :	0.978	(9784/10000)		Val loss :	0.0898


Mean log L2 = -5.526584148406982

Epoch 12 in 952.49 sec
Train accuracy :	0.991	(59461/60000)		Train loss :	0.0341
Val accuracy   :	0.975	(9749/10000)		Val loss :	0.102


Mean log L2 = -5.225204944610596

Epoch 13 in 953.51 sec
Train accuracy :	0.995	(59711/60000)		Train loss :	0.0217
Val accuracy   :	0.979	(9790/10000)		Val loss :	0.0829


Mean log L2 = -5.3005051612854

Epoch 14 in 956.63 sec
Train accuracy :	0.996	(59734/60000)		Train loss :	0.0201
Val accuracy   :	0.978	(9783/10000)		Val loss :	0.0882


Mean log L2 = -5.5847368240356445

Epoch 15 in 934.01 sec
Train accuracy :	0.997	(59804/60000)		Train loss :	0.016
Val accuracy   :	0.979	(9789/10000)		Val loss :	0.092


Mean log L2 = -5.8422088623046875

Epoch 16 in 930.53 sec
Train accuracy :	0.995	(59672/60000)		Train loss :	0.0221
Val accuracy   :	0.975	(9748/10000)		Val loss :	0.1053


Mean log L2 = -5.826635837554932

Epoch 17 in 930.12 sec
Train accuracy :	0.996	(59788/60000)		Train loss :	0.0157
Val accuracy   :	0.975	(9748/10000)		Val loss :	0.1119


Mean log L2 = -5.469745635986328

Epoch 18 in 930.43 sec
Train accuracy :	0.996	(59779/60000)		Train loss :	0.0162
Val accuracy   :	0.977	(9770/10000)		Val loss :	0.0958


Mean log L2 = -5.356444835662842

Epoch 19 in 930.96 sec
Train accuracy :	0.997	(59816/60000)		Train loss :	0.0148
Val accuracy   :	0.978	(9781/10000)		Val loss :	0.1011


Mean log L2 = -5.644309043884277

Epoch 20 in 930.63 sec
Train accuracy :	0.998	(59858/60000)		Train loss :	0.0115
Val accuracy   :	0.978	(9781/10000)		Val loss :	0.1001


Mean log L2 = -5.321649551391602

Epoch 21 in 930.64 sec
Train accuracy :	0.997	(59819/60000)		Train loss :	0.0145
Val accuracy   :	0.977	(9770/10000)		Val loss :	0.1129


Mean log L2 = -5.834875583648682

Epoch 22 in 930.17 sec
Train accuracy :	0.998	(59881/60000)		Train loss :	0.0104
Val accuracy   :	0.979	(9790/10000)		Val loss :	0.102


Mean log L2 = -5.829372406005859

Epoch 23 in 930.21 sec
Train accuracy :	0.998	(59899/60000)		Train loss :	0.0093
Val accuracy   :	0.979	(9792/10000)		Val loss :	0.0987


Mean log L2 = -5.651174545288086

Epoch 24 in 930.30 sec
Train accuracy :	0.998	(59902/60000)		Train loss :	0.0091
Val accuracy   :	0.979	(9790/10000)		Val loss :	0.1053


Mean log L2 = -5.80517578125

Epoch 25 in 930.96 sec
Train accuracy :	0.996	(59752/60000)		Train loss :	0.0198
Val accuracy   :	0.976	(9758/10000)		Val loss :	0.1161


Mean log L2 = -5.735281944274902

Epoch 26 in 931.00 sec
Train accuracy :	0.998	(59865/60000)		Train loss :	0.0115
Val accuracy   :	0.976	(9764/10000)		Val loss :	0.1078


Mean log L2 = -5.622810363769531

Epoch 27 in 931.02 sec
Train accuracy :	0.993	(59555/60000)		Train loss :	0.0338
Val accuracy   :	0.972	(9724/10000)		Val loss :	0.1352


Mean log L2 = -5.895237922668457

Epoch 28 in 930.22 sec
Train accuracy :	0.998	(59852/60000)		Train loss :	0.0117
Val accuracy   :	0.977	(9769/10000)		Val loss :	0.1131


Mean log L2 = -5.844781398773193

Epoch 29 in 930.29 sec
Train accuracy :	0.998	(59902/60000)		Train loss :	0.009
Val accuracy   :	0.977	(9772/10000)		Val loss :	0.1116


Mean log L2 = -5.765581130981445

Epoch 30 in 930.18 sec
Train accuracy :	0.998	(59856/60000)		Train loss :	0.0128
Val accuracy   :	0.978	(9780/10000)		Val loss :	0.1146


Mean log L2 = -5.649521350860596

Epoch 31 in 930.47 sec
Train accuracy :	0.998	(59888/60000)		Train loss :	0.0103
Val accuracy   :	0.979	(9787/10000)		Val loss :	0.1085


Mean log L2 = -5.796384811401367

Epoch 32 in 930.93 sec
Train accuracy :	0.996	(59778/60000)		Train loss :	0.0174
Val accuracy   :	0.974	(9738/10000)		Val loss :	0.1341


Mean log L2 = -5.7634711265563965

Epoch 33 in 931.87 sec
Train accuracy :	0.999	(59917/60000)		Train loss :	0.0077
Val accuracy   :	0.976	(9763/10000)		Val loss :	0.1185


Mean log L2 = -5.815922737121582

Epoch 34 in 932.49 sec
Train accuracy :	0.999	(59925/60000)		Train loss :	0.0071
Val accuracy   :	0.977	(9774/10000)		Val loss :	0.122


Mean log L2 = -5.797938823699951

Epoch 35 in 931.78 sec
Train accuracy :	0.998	(59866/60000)		Train loss :	0.0113
Val accuracy   :	0.977	(9766/10000)		Val loss :	0.1133


Mean log L2 = -5.767940044403076

Epoch 36 in 930.92 sec
Train accuracy :	0.998	(59902/60000)		Train loss :	0.0086
Val accuracy   :	0.976	(9761/10000)		Val loss :	0.1125


Mean log L2 = -5.837384223937988

Epoch 37 in 930.61 sec
Train accuracy :	0.999	(59926/60000)		Train loss :	0.0071
Val accuracy   :	0.977	(9765/10000)		Val loss :	0.1102


Mean log L2 = -5.787316799163818

Epoch 38 in 930.61 sec
Train accuracy :	0.997	(59840/60000)		Train loss :	0.0133
Val accuracy   :	0.976	(9764/10000)		Val loss :	0.1243


Mean log L2 = -5.681027889251709

Epoch 39 in 930.86 sec
Train accuracy :	0.997	(59837/60000)		Train loss :	0.0127
Val accuracy   :	0.975	(9752/10000)		Val loss :	0.1197


Mean log L2 = -5.78415584564209

Epoch 40 in 930.55 sec
Train accuracy :	0.999	(59922/60000)		Train loss :	0.0075
Val accuracy   :	0.978	(9777/10000)		Val loss :	0.1141


Mean log L2 = -5.879905700683594

Epoch 41 in 930.58 sec
Train accuracy :	0.998	(59882/60000)		Train loss :	0.0096
Val accuracy   :	0.977	(9769/10000)		Val loss :	0.1105


Mean log L2 = -5.675119876861572

Epoch 42 in 930.57 sec
Train accuracy :	0.999	(59927/60000)		Train loss :	0.0068
Val accuracy   :	0.976	(9764/10000)		Val loss :	0.1084


Mean log L2 = -5.805906772613525

Epoch 43 in 931.25 sec
Train accuracy :	0.999	(59926/60000)		Train loss :	0.0069
Val accuracy   :	0.979	(9789/10000)		Val loss :	0.1015


Mean log L2 = -5.8357672691345215

Epoch 44 in 930.79 sec
Train accuracy :	0.998	(59887/60000)		Train loss :	0.0094
Val accuracy   :	0.977	(9773/10000)		Val loss :	0.1075


Mean log L2 = -5.691247463226318

Epoch 45 in 930.82 sec
Train accuracy :	0.997	(59818/60000)		Train loss :	0.0131
Val accuracy   :	0.975	(9752/10000)		Val loss :	0.1066


Mean log L2 = -5.828222751617432

Epoch 46 in 930.35 sec
Train accuracy :	0.997	(59847/60000)		Train loss :	0.0131
Val accuracy   :	0.976	(9759/10000)		Val loss :	0.1232


Mean log L2 = -5.548226356506348

Epoch 47 in 931.27 sec
Train accuracy :	0.998	(59857/60000)		Train loss :	0.0112
Val accuracy   :	0.978	(9775/10000)		Val loss :	0.1187


Mean log L2 = -5.861371994018555

Epoch 48 in 930.07 sec
Train accuracy :	0.995	(59682/60000)		Train loss :	0.0227
Val accuracy   :	0.974	(9743/10000)		Val loss :	0.1312


Mean log L2 = -5.826400279998779

Epoch 49 in 930.48 sec
Train accuracy :	0.997	(59797/60000)		Train loss :	0.0181
Val accuracy   :	0.974	(9742/10000)		Val loss :	0.1341


Mean log L2 = -5.700322151184082

Epoch 50 in 929.98 sec
Train accuracy :	0.997	(59838/60000)		Train loss :	0.0145
Val accuracy   :	0.976	(9761/10000)		Val loss :	0.1216
