# Supplementary material
Source: ML conference proceedings conference paper supplement (https://proceedings.neurips.cc/paper_files/paper/2022/hash/545a114e655f9d25ba0d56ea9a01fc6e-Abstract.html)
Supplement: Supplementary file 1 [file 545a114e655f9d25ba0d56ea9a01fc6e-Supplemental-Conference.zip › revised_supplemental/code/results/table1/no_noise/continuous_hep/2022-05-18_21-29-24_xp_mlp_2h256_oscEP_N10_beta4e-1_noise0_run3/log.txt]

python train.py simus/ep/mlp/mnist_runs/no_noise/continuous_hep_run3.json

Mean log L2 = -5.416296482086182

Epoch 1 in 2373.50 sec
Train accuracy :	0.951	(57089/60000)		Train loss :	0.1716
Val accuracy   :	0.95	(9500/10000)		Val loss :	0.1802


Mean log L2 = -5.4911980628967285

Epoch 2 in 917.40 sec
Train accuracy :	0.962	(57696/60000)		Train loss :	0.1345
Val accuracy   :	0.954	(9544/10000)		Val loss :	0.1541


Mean log L2 = -4.817513465881348

Epoch 3 in 954.27 sec
Train accuracy :	0.973	(58382/60000)		Train loss :	0.0985
Val accuracy   :	0.966	(9661/10000)		Val loss :	0.1288


Mean log L2 = -5.391481876373291

Epoch 4 in 957.10 sec
Train accuracy :	0.978	(58697/60000)		Train loss :	0.0809
Val accuracy   :	0.965	(9647/10000)		Val loss :	0.1208


Mean log L2 = -5.234736919403076

Epoch 5 in 936.42 sec
Train accuracy :	0.982	(58896/60000)		Train loss :	0.0691
Val accuracy   :	0.971	(9711/10000)		Val loss :	0.1051


Mean log L2 = -4.952106475830078

Epoch 6 in 932.38 sec
Train accuracy :	0.988	(59280/60000)		Train loss :	0.0473
Val accuracy   :	0.975	(9747/10000)		Val loss :	0.0953


Mean log L2 = -5.760360240936279

Epoch 7 in 932.17 sec
Train accuracy :	0.988	(59301/60000)		Train loss :	0.044
Val accuracy   :	0.976	(9755/10000)		Val loss :	0.09


Mean log L2 = -5.662748336791992

Epoch 8 in 931.36 sec
Train accuracy :	0.99	(59376/60000)		Train loss :	0.0415
Val accuracy   :	0.977	(9768/10000)		Val loss :	0.0873


Mean log L2 = -5.320233345031738

Epoch 9 in 932.33 sec
Train accuracy :	0.992	(59529/60000)		Train loss :	0.0314
Val accuracy   :	0.977	(9771/10000)		Val loss :	0.087


Mean log L2 = -5.705417633056641

Epoch 10 in 931.92 sec
Train accuracy :	0.993	(59559/60000)		Train loss :	0.0301
Val accuracy   :	0.977	(9767/10000)		Val loss :	0.0873


Mean log L2 = -5.796586990356445

Epoch 11 in 932.33 sec
Train accuracy :	0.992	(59509/60000)		Train loss :	0.032
Val accuracy   :	0.978	(9780/10000)		Val loss :	0.0931


Mean log L2 = -5.664525508880615

Epoch 12 in 931.52 sec
Train accuracy :	0.993	(59559/60000)		Train loss :	0.029
Val accuracy   :	0.977	(9771/10000)		Val loss :	0.087


Mean log L2 = -5.652599334716797

Epoch 13 in 932.76 sec
Train accuracy :	0.992	(59499/60000)		Train loss :	0.0356
Val accuracy   :	0.973	(9732/10000)		Val loss :	0.1081


Mean log L2 = -5.757348537445068

Epoch 14 in 931.99 sec
Train accuracy :	0.996	(59778/60000)		Train loss :	0.0172
Val accuracy   :	0.98	(9796/10000)		Val loss :	0.0889


Mean log L2 = -5.641385555267334

Epoch 15 in 931.92 sec
Train accuracy :	0.995	(59684/60000)		Train loss :	0.0233
Val accuracy   :	0.976	(9758/10000)		Val loss :	0.1088


Mean log L2 = -5.437911033630371

Epoch 16 in 931.44 sec
Train accuracy :	0.997	(59806/60000)		Train loss :	0.0154
Val accuracy   :	0.977	(9774/10000)		Val loss :	0.0971


Mean log L2 = -5.771554470062256

Epoch 17 in 932.53 sec
Train accuracy :	0.997	(59804/60000)		Train loss :	0.0162
Val accuracy   :	0.977	(9767/10000)		Val loss :	0.1014


Mean log L2 = -5.725768566131592

Epoch 18 in 932.45 sec
Train accuracy :	0.997	(59827/60000)		Train loss :	0.0149
Val accuracy   :	0.977	(9773/10000)		Val loss :	0.0941


Mean log L2 = -5.773195743560791

Epoch 19 in 932.86 sec
Train accuracy :	0.997	(59834/60000)		Train loss :	0.0136
Val accuracy   :	0.976	(9764/10000)		Val loss :	0.1018


Mean log L2 = -5.8827643394470215

Epoch 20 in 932.57 sec
Train accuracy :	0.998	(59853/60000)		Train loss :	0.0123
Val accuracy   :	0.976	(9762/10000)		Val loss :	0.1111


Mean log L2 = -5.783463478088379

Epoch 21 in 932.18 sec
Train accuracy :	0.995	(59688/60000)		Train loss :	0.0233
Val accuracy   :	0.977	(9765/10000)		Val loss :	0.1029


Mean log L2 = -5.485731601715088

Epoch 22 in 932.07 sec
Train accuracy :	0.998	(59853/60000)		Train loss :	0.0128
Val accuracy   :	0.977	(9771/10000)		Val loss :	0.1055


Mean log L2 = -5.581889629364014

Epoch 23 in 933.03 sec
Train accuracy :	0.995	(59704/60000)		Train loss :	0.0226
Val accuracy   :	0.974	(9739/10000)		Val loss :	0.1218


Mean log L2 = -5.603749752044678

Epoch 24 in 933.34 sec
Train accuracy :	0.998	(59881/60000)		Train loss :	0.0106
Val accuracy   :	0.978	(9783/10000)		Val loss :	0.1083


Mean log L2 = -5.759913444519043

Epoch 25 in 933.30 sec
Train accuracy :	0.998	(59896/60000)		Train loss :	0.0097
Val accuracy   :	0.98	(9795/10000)		Val loss :	0.1011


Mean log L2 = -5.816706657409668

Epoch 26 in 932.98 sec
Train accuracy :	0.998	(59890/60000)		Train loss :	0.0108
Val accuracy   :	0.977	(9774/10000)		Val loss :	0.1067


Mean log L2 = -5.770191192626953

Epoch 27 in 932.34 sec
Train accuracy :	0.998	(59860/60000)		Train loss :	0.0124
Val accuracy   :	0.976	(9764/10000)		Val loss :	0.1168


Mean log L2 = -5.828746318817139

Epoch 28 in 932.34 sec
Train accuracy :	0.997	(59806/60000)		Train loss :	0.0166
Val accuracy   :	0.976	(9759/10000)		Val loss :	0.1163


Mean log L2 = -5.784999370574951

Epoch 29 in 931.68 sec
Train accuracy :	0.998	(59859/60000)		Train loss :	0.0132
Val accuracy   :	0.976	(9764/10000)		Val loss :	0.1255


Mean log L2 = -5.8552069664001465

Epoch 30 in 932.36 sec
Train accuracy :	0.999	(59910/60000)		Train loss :	0.0085
Val accuracy   :	0.976	(9760/10000)		Val loss :	0.1265


Mean log L2 = -5.836846828460693

Epoch 31 in 932.64 sec
Train accuracy :	0.999	(59947/60000)		Train loss :	0.0059
Val accuracy   :	0.977	(9774/10000)		Val loss :	0.1155


Mean log L2 = -5.83193302154541

Epoch 32 in 932.20 sec
Train accuracy :	0.998	(59899/60000)		Train loss :	0.0091
Val accuracy   :	0.977	(9770/10000)		Val loss :	0.1177


Mean log L2 = -5.638780117034912

Epoch 33 in 932.04 sec
Train accuracy :	0.997	(59828/60000)		Train loss :	0.0134
Val accuracy   :	0.976	(9762/10000)		Val loss :	0.1116


Mean log L2 = -5.86212158203125

Epoch 34 in 933.00 sec
Train accuracy :	0.998	(59893/60000)		Train loss :	0.0092
Val accuracy   :	0.978	(9776/10000)		Val loss :	0.1115


Mean log L2 = -5.503086566925049

Epoch 35 in 932.40 sec
Train accuracy :	0.999	(59926/60000)		Train loss :	0.007
Val accuracy   :	0.977	(9771/10000)		Val loss :	0.1101


Mean log L2 = -5.710371017456055

Epoch 36 in 932.68 sec
Train accuracy :	0.998	(59883/60000)		Train loss :	0.0114
Val accuracy   :	0.978	(9778/10000)		Val loss :	0.1095


Mean log L2 = -5.7725396156311035

Epoch 37 in 932.11 sec
Train accuracy :	0.999	(59920/60000)		Train loss :	0.008
Val accuracy   :	0.979	(9785/10000)		Val loss :	0.1054


Mean log L2 = -5.744453430175781

Epoch 38 in 932.36 sec
Train accuracy :	0.998	(59898/60000)		Train loss :	0.009
Val accuracy   :	0.977	(9767/10000)		Val loss :	0.1128


Mean log L2 = -5.834968090057373

Epoch 39 in 932.77 sec
Train accuracy :	0.998	(59870/60000)		Train loss :	0.0122
Val accuracy   :	0.977	(9766/10000)		Val loss :	0.1125


Mean log L2 = -5.3547892570495605

Epoch 40 in 931.51 sec
Train accuracy :	0.999	(59936/60000)		Train loss :	0.006
Val accuracy   :	0.978	(9780/10000)		Val loss :	0.1134


Mean log L2 = -5.788647651672363

Epoch 41 in 913.32 sec
Train accuracy :	0.999	(59932/60000)		Train loss :	0.0062
Val accuracy   :	0.978	(9783/10000)		Val loss :	0.1219


Mean log L2 = -5.859767913818359

Epoch 42 in 913.59 sec
Train accuracy :	0.993	(59563/60000)		Train loss :	0.0372
Val accuracy   :	0.973	(9727/10000)		Val loss :	0.1569


Mean log L2 = -5.858712673187256

Epoch 43 in 913.80 sec
Train accuracy :	0.997	(59849/60000)		Train loss :	0.0125
Val accuracy   :	0.975	(9745/10000)		Val loss :	0.1369


Mean log L2 = -5.794910907745361

Epoch 44 in 913.52 sec
Train accuracy :	0.998	(59888/60000)		Train loss :	0.0102
Val accuracy   :	0.976	(9764/10000)		Val loss :	0.1254


Mean log L2 = -5.720990180969238

Epoch 45 in 913.72 sec
Train accuracy :	0.999	(59943/60000)		Train loss :	0.0051
Val accuracy   :	0.977	(9767/10000)		Val loss :	0.123


Mean log L2 = -5.813125133514404

Epoch 46 in 913.71 sec
Train accuracy :	0.998	(59893/60000)		Train loss :	0.0086
Val accuracy   :	0.977	(9774/10000)		Val loss :	0.1116


Mean log L2 = -5.775537014007568

Epoch 47 in 913.85 sec
Train accuracy :	0.999	(59925/60000)		Train loss :	0.0063
Val accuracy   :	0.977	(9768/10000)		Val loss :	0.121


Mean log L2 = -5.7478861808776855

Epoch 48 in 913.45 sec
Train accuracy :	0.998	(59853/60000)		Train loss :	0.0125
Val accuracy   :	0.976	(9758/10000)		Val loss :	0.123


Mean log L2 = -5.770334720611572

Epoch 49 in 912.90 sec
Train accuracy :	0.999	(59932/60000)		Train loss :	0.0062
Val accuracy   :	0.979	(9785/10000)		Val loss :	0.1012


Mean log L2 = -5.749088764190674

Epoch 50 in 924.99 sec
Train accuracy :	0.998	(59850/60000)		Train loss :	0.0131
Val accuracy   :	0.978	(9776/10000)		Val loss :	0.1145
