# Supplementary material
Source: ML conference proceedings conference paper supplement (https://proceedings.neurips.cc/paper_files/paper/2022/hash/545a114e655f9d25ba0d56ea9a01fc6e-Abstract.html)
Supplement: Supplementary file 1 [file 545a114e655f9d25ba0d56ea9a01fc6e-Supplemental-Conference.zip › revised_supplemental/code/results/table1/no_noise/hep/2022-05-18_15-49-46_xp_mlp_2h256_ep10_beta4e-1_noise0_run1/log.txt]

python train.py simus/ep/mlp/mnist_runs/no_noise/hep_run1.json

Mean log L2 = -5.87397575378418

Epoch 1 in 371.71 sec
Train accuracy :	0.947	(56807/60000)		Train loss :	0.1902
Val accuracy   :	0.942	(9421/10000)		Val loss :	0.2014


Mean log L2 = -5.802426815032959

Epoch 2 in 44.09 sec
Train accuracy :	0.964	(57844/60000)		Train loss :	0.133
Val accuracy   :	0.956	(9563/10000)		Val loss :	0.1636


Mean log L2 = -5.873687744140625

Epoch 3 in 44.78 sec
Train accuracy :	0.976	(58545/60000)		Train loss :	0.089
Val accuracy   :	0.966	(9659/10000)		Val loss :	0.1213


Mean log L2 = -5.8730082511901855

Epoch 4 in 44.69 sec
Train accuracy :	0.975	(58520/60000)		Train loss :	0.0908
Val accuracy   :	0.967	(9665/10000)		Val loss :	0.1218


Mean log L2 = -5.859685897827148

Epoch 5 in 44.69 sec
Train accuracy :	0.984	(59049/60000)		Train loss :	0.0621
Val accuracy   :	0.973	(9725/10000)		Val loss :	0.099


Mean log L2 = -5.868574619293213

Epoch 6 in 44.83 sec
Train accuracy :	0.985	(59095/60000)		Train loss :	0.0557
Val accuracy   :	0.972	(9719/10000)		Val loss :	0.1065


Mean log L2 = -5.870609283447266

Epoch 7 in 44.97 sec
Train accuracy :	0.988	(59256/60000)		Train loss :	0.0452
Val accuracy   :	0.975	(9745/10000)		Val loss :	0.0951


Mean log L2 = -5.863905429840088

Epoch 8 in 44.68 sec
Train accuracy :	0.989	(59353/60000)		Train loss :	0.042
Val accuracy   :	0.974	(9738/10000)		Val loss :	0.0983


Mean log L2 = -5.870398044586182

Epoch 9 in 44.74 sec
Train accuracy :	0.993	(59564/60000)		Train loss :	0.0292
Val accuracy   :	0.976	(9764/10000)		Val loss :	0.0906


Mean log L2 = -5.851276874542236

Epoch 10 in 44.95 sec
Train accuracy :	0.994	(59630/60000)		Train loss :	0.0253
Val accuracy   :	0.977	(9767/10000)		Val loss :	0.089


Mean log L2 = -5.853177547454834

Epoch 11 in 44.63 sec
Train accuracy :	0.995	(59722/60000)		Train loss :	0.0205
Val accuracy   :	0.977	(9767/10000)		Val loss :	0.0959


Mean log L2 = -5.837870121002197

Epoch 12 in 45.11 sec
Train accuracy :	0.996	(59750/60000)		Train loss :	0.0189
Val accuracy   :	0.98	(9795/10000)		Val loss :	0.083


Mean log L2 = -5.8814005851745605

Epoch 13 in 44.84 sec
Train accuracy :	0.998	(59854/60000)		Train loss :	0.0124
Val accuracy   :	0.98	(9799/10000)		Val loss :	0.0905


Mean log L2 = -5.84509801864624

Epoch 14 in 44.66 sec
Train accuracy :	0.995	(59678/60000)		Train loss :	0.0213
Val accuracy   :	0.978	(9778/10000)		Val loss :	0.0924


Mean log L2 = -5.865924835205078

Epoch 15 in 44.57 sec
Train accuracy :	0.997	(59827/60000)		Train loss :	0.014
Val accuracy   :	0.979	(9794/10000)		Val loss :	0.0939


Mean log L2 = -5.8534255027771

Epoch 16 in 44.87 sec
Train accuracy :	0.997	(59847/60000)		Train loss :	0.0129
Val accuracy   :	0.98	(9795/10000)		Val loss :	0.0942


Mean log L2 = -5.869347095489502

Epoch 17 in 44.81 sec
Train accuracy :	0.998	(59874/60000)		Train loss :	0.0107
Val accuracy   :	0.979	(9794/10000)		Val loss :	0.0939


Mean log L2 = -5.833895683288574

Epoch 18 in 44.66 sec
Train accuracy :	0.998	(59862/60000)		Train loss :	0.0119
Val accuracy   :	0.98	(9796/10000)		Val loss :	0.1058


Mean log L2 = -5.850930690765381

Epoch 19 in 44.77 sec
Train accuracy :	0.998	(59874/60000)		Train loss :	0.0117
Val accuracy   :	0.981	(9811/10000)		Val loss :	0.1


Mean log L2 = -5.858535289764404

Epoch 20 in 45.03 sec
Train accuracy :	0.996	(59733/60000)		Train loss :	0.0194
Val accuracy   :	0.974	(9735/10000)		Val loss :	0.1174


Mean log L2 = -5.859212875366211

Epoch 21 in 44.69 sec
Train accuracy :	0.998	(59867/60000)		Train loss :	0.0117
Val accuracy   :	0.978	(9779/10000)		Val loss :	0.1028


Mean log L2 = -5.861743927001953

Epoch 22 in 44.82 sec
Train accuracy :	0.998	(59894/60000)		Train loss :	0.0101
Val accuracy   :	0.98	(9795/10000)		Val loss :	0.0974


Mean log L2 = -5.8557634353637695

Epoch 23 in 44.77 sec
Train accuracy :	0.999	(59932/60000)		Train loss :	0.0072
Val accuracy   :	0.981	(9811/10000)		Val loss :	0.0918


Mean log L2 = -5.53646993637085

Epoch 24 in 44.93 sec
Train accuracy :	0.998	(59908/60000)		Train loss :	0.0088
Val accuracy   :	0.98	(9804/10000)		Val loss :	0.0934


Mean log L2 = -5.769260406494141

Epoch 25 in 44.70 sec
Train accuracy :	0.998	(59894/60000)		Train loss :	0.0092
Val accuracy   :	0.977	(9773/10000)		Val loss :	0.1104


Mean log L2 = -5.855987071990967

Epoch 26 in 44.62 sec
Train accuracy :	0.998	(59861/60000)		Train loss :	0.0111
Val accuracy   :	0.977	(9765/10000)		Val loss :	0.1118


Mean log L2 = -5.858819007873535

Epoch 27 in 44.38 sec
Train accuracy :	0.998	(59894/60000)		Train loss :	0.01
Val accuracy   :	0.978	(9782/10000)		Val loss :	0.1086


Mean log L2 = -5.844420433044434

Epoch 28 in 44.41 sec
Train accuracy :	0.999	(59938/60000)		Train loss :	0.0058
Val accuracy   :	0.979	(9787/10000)		Val loss :	0.1077


Mean log L2 = -5.844367504119873

Epoch 29 in 44.31 sec
Train accuracy :	0.999	(59965/60000)		Train loss :	0.0043
Val accuracy   :	0.979	(9785/10000)		Val loss :	0.1117


Mean log L2 = -5.839778423309326

Epoch 30 in 44.26 sec
Train accuracy :	0.999	(59919/60000)		Train loss :	0.0079
Val accuracy   :	0.98	(9798/10000)		Val loss :	0.1016


Mean log L2 = -5.838731288909912

Epoch 31 in 44.79 sec
Train accuracy :	0.998	(59880/60000)		Train loss :	0.01
Val accuracy   :	0.978	(9777/10000)		Val loss :	0.1104


Mean log L2 = -5.518352031707764

Epoch 32 in 44.59 sec
Train accuracy :	0.999	(59923/60000)		Train loss :	0.0071
Val accuracy   :	0.98	(9795/10000)		Val loss :	0.1033


Mean log L2 = -5.841760158538818

Epoch 33 in 44.79 sec
Train accuracy :	0.999	(59933/60000)		Train loss :	0.0074
Val accuracy   :	0.98	(9801/10000)		Val loss :	0.1015


Mean log L2 = -5.871230602264404

Epoch 34 in 44.63 sec
Train accuracy :	0.998	(59877/60000)		Train loss :	0.0103
Val accuracy   :	0.978	(9778/10000)		Val loss :	0.113


Mean log L2 = -5.842985153198242

Epoch 35 in 44.54 sec
Train accuracy :	0.999	(59923/60000)		Train loss :	0.0074
Val accuracy   :	0.979	(9789/10000)		Val loss :	0.1145


Mean log L2 = -5.852736949920654

Epoch 36 in 44.43 sec
Train accuracy :	0.999	(59933/60000)		Train loss :	0.0068
Val accuracy   :	0.979	(9790/10000)		Val loss :	0.0978


Mean log L2 = -5.847196102142334

Epoch 37 in 44.47 sec
Train accuracy :	0.999	(59922/60000)		Train loss :	0.007
Val accuracy   :	0.98	(9795/10000)		Val loss :	0.1037


Mean log L2 = -5.708071708679199

Epoch 38 in 44.34 sec
Train accuracy :	0.997	(59839/60000)		Train loss :	0.0141
Val accuracy   :	0.976	(9759/10000)		Val loss :	0.1212


Mean log L2 = -5.843622207641602

Epoch 39 in 44.83 sec
Train accuracy :	0.999	(59945/60000)		Train loss :	0.0065
Val accuracy   :	0.979	(9792/10000)		Val loss :	0.1018


Mean log L2 = -5.851060390472412

Epoch 40 in 44.60 sec
Train accuracy :	0.999	(59934/60000)		Train loss :	0.0066
Val accuracy   :	0.978	(9782/10000)		Val loss :	0.1101


Mean log L2 = -5.854988098144531

Epoch 41 in 45.20 sec
Train accuracy :	0.999	(59917/60000)		Train loss :	0.007
Val accuracy   :	0.98	(9800/10000)		Val loss :	0.1025


Mean log L2 = -5.850742816925049

Epoch 42 in 44.56 sec
Train accuracy :	0.999	(59958/60000)		Train loss :	0.0044
Val accuracy   :	0.98	(9802/10000)		Val loss :	0.1096


Mean log L2 = -5.8398284912109375

Epoch 43 in 45.14 sec
Train accuracy :	0.996	(59768/60000)		Train loss :	0.0179
Val accuracy   :	0.976	(9760/10000)		Val loss :	0.1288


Mean log L2 = -5.8586554527282715

Epoch 44 in 44.46 sec
Train accuracy :	0.999	(59929/60000)		Train loss :	0.0077
Val accuracy   :	0.979	(9786/10000)		Val loss :	0.1053


Mean log L2 = -5.800572395324707

Epoch 45 in 44.64 sec
Train accuracy :	1.0	(59992/60000)		Train loss :	0.0023
Val accuracy   :	0.981	(9809/10000)		Val loss :	0.1022


Mean log L2 = -5.848025798797607

Epoch 46 in 44.33 sec
Train accuracy :	0.998	(59878/60000)		Train loss :	0.0107
Val accuracy   :	0.977	(9772/10000)		Val loss :	0.1209


Mean log L2 = -5.8342413902282715

Epoch 47 in 44.90 sec
Train accuracy :	0.999	(59948/60000)		Train loss :	0.0049
Val accuracy   :	0.979	(9790/10000)		Val loss :	0.1145


Mean log L2 = -5.832747936248779

Epoch 48 in 44.64 sec
Train accuracy :	1.0	(59974/60000)		Train loss :	0.0025
Val accuracy   :	0.979	(9786/10000)		Val loss :	0.1238


Mean log L2 = -5.839376449584961

Epoch 49 in 44.66 sec
Train accuracy :	0.998	(59907/60000)		Train loss :	0.0076
Val accuracy   :	0.978	(9784/10000)		Val loss :	0.1145


Mean log L2 = -5.845356464385986

Epoch 50 in 44.47 sec
Train accuracy :	0.998	(59881/60000)		Train loss :	0.0103
Val accuracy   :	0.978	(9776/10000)		Val loss :	0.116
