# Supplementary material
Source: ML conference proceedings conference paper supplement (https://proceedings.neurips.cc/paper_files/paper/2022/hash/545a114e655f9d25ba0d56ea9a01fc6e-Abstract.html)
Supplement: Supplementary file 1 [file 545a114e655f9d25ba0d56ea9a01fc6e-Supplemental-Conference.zip › revised_supplemental/code/results/table1/no_noise/hep/2022-05-18_15-58-28_xp_mlp_2h256_ep10_beta4e-1_noise0_run3/log.txt]

python train.py simus/ep/mlp/mnist_runs/no_noise/hep_run3.json

Mean log L2 = -5.875514507293701

Epoch 1 in 390.59 sec
Train accuracy :	0.95	(57021/60000)		Train loss :	0.1776
Val accuracy   :	0.948	(9482/10000)		Val loss :	0.1862


Mean log L2 = -5.867015361785889

Epoch 2 in 44.72 sec
Train accuracy :	0.963	(57802/60000)		Train loss :	0.133
Val accuracy   :	0.955	(9549/10000)		Val loss :	0.1634


Mean log L2 = -5.861270427703857

Epoch 3 in 44.73 sec
Train accuracy :	0.976	(58549/60000)		Train loss :	0.0904
Val accuracy   :	0.967	(9673/10000)		Val loss :	0.1227


Mean log L2 = -5.822448253631592

Epoch 4 in 45.26 sec
Train accuracy :	0.981	(58860/60000)		Train loss :	0.0728
Val accuracy   :	0.969	(9688/10000)		Val loss :	0.1158


Mean log L2 = -5.763207912445068

Epoch 5 in 45.76 sec
Train accuracy :	0.981	(58875/60000)		Train loss :	0.0676
Val accuracy   :	0.966	(9663/10000)		Val loss :	0.1131


Mean log L2 = -5.848494052886963

Epoch 6 in 45.71 sec
Train accuracy :	0.988	(59271/60000)		Train loss :	0.0469
Val accuracy   :	0.974	(9742/10000)		Val loss :	0.0999


Mean log L2 = -5.869555473327637

Epoch 7 in 45.36 sec
Train accuracy :	0.989	(59315/60000)		Train loss :	0.0433
Val accuracy   :	0.973	(9725/10000)		Val loss :	0.1036


Mean log L2 = -5.866485118865967

Epoch 8 in 45.72 sec
Train accuracy :	0.992	(59502/60000)		Train loss :	0.0343
Val accuracy   :	0.974	(9740/10000)		Val loss :	0.0952


Mean log L2 = -5.861020088195801

Epoch 9 in 46.02 sec
Train accuracy :	0.993	(59554/60000)		Train loss :	0.0287
Val accuracy   :	0.976	(9760/10000)		Val loss :	0.0928


Mean log L2 = -5.838076114654541

Epoch 10 in 45.86 sec
Train accuracy :	0.994	(59666/60000)		Train loss :	0.0227
Val accuracy   :	0.978	(9782/10000)		Val loss :	0.0917


Mean log L2 = -5.860377788543701

Epoch 11 in 45.52 sec
Train accuracy :	0.994	(59667/60000)		Train loss :	0.0226
Val accuracy   :	0.978	(9777/10000)		Val loss :	0.0884


Mean log L2 = -5.787289619445801

Epoch 12 in 45.75 sec
Train accuracy :	0.996	(59744/60000)		Train loss :	0.0181
Val accuracy   :	0.979	(9785/10000)		Val loss :	0.0917


Mean log L2 = -5.852007865905762

Epoch 13 in 45.26 sec
Train accuracy :	0.996	(59774/60000)		Train loss :	0.0173
Val accuracy   :	0.978	(9781/10000)		Val loss :	0.0945


Mean log L2 = -5.861031532287598

Epoch 14 in 45.66 sec
Train accuracy :	0.997	(59793/60000)		Train loss :	0.0154
Val accuracy   :	0.979	(9790/10000)		Val loss :	0.093


Mean log L2 = -5.836246013641357

Epoch 15 in 46.18 sec
Train accuracy :	0.996	(59789/60000)		Train loss :	0.0164
Val accuracy   :	0.976	(9757/10000)		Val loss :	0.1095


Mean log L2 = -5.844345569610596

Epoch 16 in 45.87 sec
Train accuracy :	0.998	(59870/60000)		Train loss :	0.0108
Val accuracy   :	0.979	(9788/10000)		Val loss :	0.0956


Mean log L2 = -5.854740142822266

Epoch 17 in 45.97 sec
Train accuracy :	0.998	(59883/60000)		Train loss :	0.0106
Val accuracy   :	0.979	(9789/10000)		Val loss :	0.098


Mean log L2 = -5.849095821380615

Epoch 18 in 45.91 sec
Train accuracy :	0.997	(59827/60000)		Train loss :	0.0134
Val accuracy   :	0.978	(9781/10000)		Val loss :	0.1026


Mean log L2 = -5.8395161628723145

Epoch 19 in 45.70 sec
Train accuracy :	0.997	(59831/60000)		Train loss :	0.0124
Val accuracy   :	0.978	(9776/10000)		Val loss :	0.1113


Mean log L2 = -5.85745096206665

Epoch 20 in 45.67 sec
Train accuracy :	0.999	(59914/60000)		Train loss :	0.008
Val accuracy   :	0.979	(9792/10000)		Val loss :	0.1041


Mean log L2 = -5.87154483795166

Epoch 21 in 45.77 sec
Train accuracy :	0.998	(59859/60000)		Train loss :	0.0112
Val accuracy   :	0.978	(9783/10000)		Val loss :	0.0967


Mean log L2 = -5.849003791809082

Epoch 22 in 45.94 sec
Train accuracy :	0.998	(59880/60000)		Train loss :	0.0101
Val accuracy   :	0.978	(9776/10000)		Val loss :	0.1184


Mean log L2 = -5.85335111618042

Epoch 23 in 45.25 sec
Train accuracy :	0.998	(59857/60000)		Train loss :	0.0112
Val accuracy   :	0.977	(9768/10000)		Val loss :	0.1196


Mean log L2 = -5.857273578643799

Epoch 24 in 45.53 sec
Train accuracy :	0.998	(59900/60000)		Train loss :	0.0099
Val accuracy   :	0.977	(9769/10000)		Val loss :	0.1184


Mean log L2 = -5.834390163421631

Epoch 25 in 45.76 sec
Train accuracy :	0.997	(59814/60000)		Train loss :	0.0162
Val accuracy   :	0.976	(9755/10000)		Val loss :	0.1321


Mean log L2 = -5.850958347320557

Epoch 26 in 45.69 sec
Train accuracy :	0.998	(59893/60000)		Train loss :	0.0086
Val accuracy   :	0.979	(9788/10000)		Val loss :	0.1058


Mean log L2 = -5.83643102645874

Epoch 27 in 46.40 sec
Train accuracy :	0.999	(59912/60000)		Train loss :	0.008
Val accuracy   :	0.979	(9790/10000)		Val loss :	0.104


Mean log L2 = -5.832233428955078

Epoch 28 in 53.11 sec
Train accuracy :	0.997	(59824/60000)		Train loss :	0.014
Val accuracy   :	0.978	(9781/10000)		Val loss :	0.1133


Mean log L2 = -5.847558498382568

Epoch 29 in 49.31 sec
Train accuracy :	0.999	(59938/60000)		Train loss :	0.0059
Val accuracy   :	0.979	(9792/10000)		Val loss :	0.1056


Mean log L2 = -5.851444721221924

Epoch 30 in 48.42 sec
Train accuracy :	1.0	(59970/60000)		Train loss :	0.0046
Val accuracy   :	0.979	(9788/10000)		Val loss :	0.1026


Mean log L2 = -5.7724809646606445

Epoch 31 in 46.73 sec
Train accuracy :	0.999	(59918/60000)		Train loss :	0.0078
Val accuracy   :	0.977	(9766/10000)		Val loss :	0.1089


Mean log L2 = -5.8504438400268555

Epoch 32 in 45.60 sec
Train accuracy :	0.997	(59824/60000)		Train loss :	0.0146
Val accuracy   :	0.975	(9752/10000)		Val loss :	0.1247


Mean log L2 = -5.746278285980225

Epoch 33 in 45.62 sec
Train accuracy :	0.999	(59957/60000)		Train loss :	0.0054
Val accuracy   :	0.976	(9762/10000)		Val loss :	0.1274


Mean log L2 = -5.835195064544678

Epoch 34 in 45.96 sec
Train accuracy :	0.998	(59857/60000)		Train loss :	0.0133
Val accuracy   :	0.976	(9761/10000)		Val loss :	0.1254


Mean log L2 = -5.863424301147461

Epoch 35 in 45.92 sec
Train accuracy :	0.999	(59911/60000)		Train loss :	0.0089
Val accuracy   :	0.977	(9774/10000)		Val loss :	0.1173


Mean log L2 = -5.847198009490967

Epoch 36 in 45.67 sec
Train accuracy :	0.998	(59876/60000)		Train loss :	0.0105
Val accuracy   :	0.978	(9777/10000)		Val loss :	0.1059


Mean log L2 = -5.852738857269287

Epoch 37 in 45.44 sec
Train accuracy :	0.999	(59924/60000)		Train loss :	0.0071
Val accuracy   :	0.978	(9781/10000)		Val loss :	0.1098


Mean log L2 = -5.830506324768066

Epoch 38 in 45.83 sec
Train accuracy :	0.999	(59945/60000)		Train loss :	0.0067
Val accuracy   :	0.975	(9749/10000)		Val loss :	0.1273


Mean log L2 = -5.854827404022217

Epoch 39 in 46.23 sec
Train accuracy :	0.998	(59856/60000)		Train loss :	0.0117
Val accuracy   :	0.977	(9765/10000)		Val loss :	0.1139


Mean log L2 = -5.828085899353027

Epoch 40 in 45.55 sec
Train accuracy :	0.999	(59935/60000)		Train loss :	0.006
Val accuracy   :	0.976	(9763/10000)		Val loss :	0.1234


Mean log L2 = -5.818967342376709

Epoch 41 in 48.77 sec
Train accuracy :	0.999	(59948/60000)		Train loss :	0.0056
Val accuracy   :	0.978	(9778/10000)		Val loss :	0.1085


Mean log L2 = -5.8257646560668945

Epoch 42 in 49.86 sec
Train accuracy :	0.998	(59908/60000)		Train loss :	0.0078
Val accuracy   :	0.977	(9770/10000)		Val loss :	0.1108


Mean log L2 = -5.848875522613525

Epoch 43 in 50.32 sec
Train accuracy :	0.998	(59862/60000)		Train loss :	0.0108
Val accuracy   :	0.977	(9765/10000)		Val loss :	0.1136


Mean log L2 = -5.837390422821045

Epoch 44 in 49.30 sec
Train accuracy :	0.996	(59769/60000)		Train loss :	0.0163
Val accuracy   :	0.976	(9758/10000)		Val loss :	0.1123


Mean log L2 = -5.814023494720459

Epoch 45 in 45.25 sec
Train accuracy :	0.999	(59953/60000)		Train loss :	0.0045
Val accuracy   :	0.979	(9790/10000)		Val loss :	0.1153


Mean log L2 = -5.8406291007995605

Epoch 46 in 45.43 sec
Train accuracy :	0.998	(59875/60000)		Train loss :	0.0095
Val accuracy   :	0.974	(9742/10000)		Val loss :	0.1264


Mean log L2 = -5.858205795288086

Epoch 47 in 45.56 sec
Train accuracy :	1.0	(59977/60000)		Train loss :	0.0031
Val accuracy   :	0.977	(9774/10000)		Val loss :	0.1165


Mean log L2 = -5.839758396148682

Epoch 48 in 45.42 sec
Train accuracy :	1.0	(59972/60000)		Train loss :	0.004
Val accuracy   :	0.977	(9773/10000)		Val loss :	0.1205


Mean log L2 = -5.839267253875732

Epoch 49 in 45.21 sec
Train accuracy :	0.997	(59826/60000)		Train loss :	0.0131
Val accuracy   :	0.976	(9761/10000)		Val loss :	0.1197


Mean log L2 = -5.828518390655518

Epoch 50 in 45.36 sec
Train accuracy :	0.997	(59806/60000)		Train loss :	0.0154
Val accuracy   :	0.973	(9732/10000)		Val loss :	0.1347
