# Supplementary material
Source: ML conference proceedings conference paper supplement (https://proceedings.neurips.cc/paper_files/paper/2022/hash/545a114e655f9d25ba0d56ea9a01fc6e-Abstract.html)
Supplement: Supplementary file 1 [file 545a114e655f9d25ba0d56ea9a01fc6e-Supplemental-Conference.zip › revised_supplemental/code/results/table1/no_noise/hep/2022-05-18_16-36-53_xp_mlp_2h256_ep10_beta4e-1_noise0_run2/log.txt]

python train.py simus/ep/mlp/mnist_runs/no_noise/hep_run2.json

Mean log L2 = -5.962756633758545

Epoch 1 in 148.27 sec
Train accuracy :	0.951	(57079/60000)		Train loss :	0.1754
Val accuracy   :	0.95	(9503/10000)		Val loss :	0.1861


Mean log L2 = -5.959996700286865

Epoch 2 in 78.13 sec
Train accuracy :	0.965	(57883/60000)		Train loss :	0.131
Val accuracy   :	0.962	(9616/10000)		Val loss :	0.1517


Mean log L2 = -5.964569091796875

Epoch 3 in 77.97 sec
Train accuracy :	0.972	(58333/60000)		Train loss :	0.0994
Val accuracy   :	0.962	(9622/10000)		Val loss :	0.1307


Mean log L2 = -5.9663190841674805

Epoch 4 in 77.86 sec
Train accuracy :	0.977	(58633/60000)		Train loss :	0.0828
Val accuracy   :	0.967	(9670/10000)		Val loss :	0.1215


Mean log L2 = -5.964834690093994

Epoch 5 in 77.97 sec
Train accuracy :	0.983	(58953/60000)		Train loss :	0.0635
Val accuracy   :	0.973	(9727/10000)		Val loss :	0.1023


Mean log L2 = -5.971097946166992

Epoch 6 in 77.84 sec
Train accuracy :	0.987	(59248/60000)		Train loss :	0.0467
Val accuracy   :	0.976	(9761/10000)		Val loss :	0.0931


Mean log L2 = -5.973246097564697

Epoch 7 in 78.28 sec
Train accuracy :	0.98	(58784/60000)		Train loss :	0.0744
Val accuracy   :	0.967	(9666/10000)		Val loss :	0.1303


Mean log L2 = -5.955204010009766

Epoch 8 in 78.07 sec
Train accuracy :	0.992	(59507/60000)		Train loss :	0.0337
Val accuracy   :	0.977	(9766/10000)		Val loss :	0.0915


Mean log L2 = -5.9601874351501465

Epoch 9 in 77.96 sec
Train accuracy :	0.993	(59577/60000)		Train loss :	0.029
Val accuracy   :	0.978	(9777/10000)		Val loss :	0.0872


Mean log L2 = -5.976914882659912

Epoch 10 in 78.10 sec
Train accuracy :	0.991	(59475/60000)		Train loss :	0.0345
Val accuracy   :	0.976	(9758/10000)		Val loss :	0.1001


Mean log L2 = -5.9712042808532715

Epoch 11 in 78.16 sec
Train accuracy :	0.995	(59677/60000)		Train loss :	0.0213
Val accuracy   :	0.979	(9785/10000)		Val loss :	0.0928


Mean log L2 = -5.958186626434326

Epoch 12 in 78.26 sec
Train accuracy :	0.996	(59735/60000)		Train loss :	0.019
Val accuracy   :	0.979	(9789/10000)		Val loss :	0.0901


Mean log L2 = -5.875373840332031

Epoch 13 in 78.38 sec
Train accuracy :	0.994	(59644/60000)		Train loss :	0.0233
Val accuracy   :	0.978	(9777/10000)		Val loss :	0.0998


Mean log L2 = -5.968653678894043

Epoch 14 in 78.13 sec
Train accuracy :	0.997	(59793/60000)		Train loss :	0.0155
Val accuracy   :	0.98	(9803/10000)		Val loss :	0.0898


Mean log L2 = -5.964171409606934

Epoch 15 in 78.55 sec
Train accuracy :	0.997	(59827/60000)		Train loss :	0.0142
Val accuracy   :	0.98	(9796/10000)		Val loss :	0.09


Mean log L2 = -5.955930233001709

Epoch 16 in 78.11 sec
Train accuracy :	0.996	(59731/60000)		Train loss :	0.0178
Val accuracy   :	0.978	(9776/10000)		Val loss :	0.1019


Mean log L2 = -5.9654860496521

Epoch 17 in 78.15 sec
Train accuracy :	0.996	(59787/60000)		Train loss :	0.0172
Val accuracy   :	0.977	(9766/10000)		Val loss :	0.1101


Mean log L2 = -5.959010601043701

Epoch 18 in 78.25 sec
Train accuracy :	0.998	(59862/60000)		Train loss :	0.0126
Val accuracy   :	0.978	(9783/10000)		Val loss :	0.0999


Mean log L2 = -5.953165054321289

Epoch 19 in 78.15 sec
Train accuracy :	0.999	(59912/60000)		Train loss :	0.0085
Val accuracy   :	0.978	(9778/10000)		Val loss :	0.1056


Mean log L2 = -5.963400363922119

Epoch 20 in 78.12 sec
Train accuracy :	0.998	(59905/60000)		Train loss :	0.0095
Val accuracy   :	0.978	(9782/10000)		Val loss :	0.1081


Mean log L2 = -5.928806781768799

Epoch 21 in 78.07 sec
Train accuracy :	0.998	(59869/60000)		Train loss :	0.0115
Val accuracy   :	0.978	(9783/10000)		Val loss :	0.0998


Mean log L2 = -5.955448150634766

Epoch 22 in 78.27 sec
Train accuracy :	0.999	(59920/60000)		Train loss :	0.0083
Val accuracy   :	0.978	(9782/10000)		Val loss :	0.1042


Mean log L2 = -5.961397171020508

Epoch 23 in 78.16 sec
Train accuracy :	0.998	(59902/60000)		Train loss :	0.0091
Val accuracy   :	0.979	(9788/10000)		Val loss :	0.106


Mean log L2 = -5.968270301818848

Epoch 24 in 78.16 sec
Train accuracy :	0.998	(59877/60000)		Train loss :	0.0108
Val accuracy   :	0.978	(9784/10000)		Val loss :	0.1017


Mean log L2 = -5.9666056632995605

Epoch 25 in 78.17 sec
Train accuracy :	0.998	(59894/60000)		Train loss :	0.0096
Val accuracy   :	0.978	(9777/10000)		Val loss :	0.1124


Mean log L2 = -5.9630446434021

Epoch 26 in 78.31 sec
Train accuracy :	0.999	(59950/60000)		Train loss :	0.0056
Val accuracy   :	0.981	(9805/10000)		Val loss :	0.0971


Mean log L2 = -5.963400840759277

Epoch 27 in 85.42 sec
Train accuracy :	0.998	(59880/60000)		Train loss :	0.011
Val accuracy   :	0.977	(9774/10000)		Val loss :	0.1243


Mean log L2 = -5.957033634185791

Epoch 28 in 84.43 sec
Train accuracy :	0.999	(59934/60000)		Train loss :	0.0077
Val accuracy   :	0.979	(9785/10000)		Val loss :	0.1113


Mean log L2 = -5.968515396118164

Epoch 29 in 84.75 sec
Train accuracy :	0.995	(59671/60000)		Train loss :	0.0238
Val accuracy   :	0.974	(9741/10000)		Val loss :	0.1274


Mean log L2 = -5.948352813720703

Epoch 30 in 79.03 sec
Train accuracy :	0.998	(59897/60000)		Train loss :	0.0094
Val accuracy   :	0.979	(9791/10000)		Val loss :	0.1049


Mean log L2 = -5.803465366363525

Epoch 31 in 77.83 sec
Train accuracy :	0.997	(59849/60000)		Train loss :	0.0135
Val accuracy   :	0.978	(9776/10000)		Val loss :	0.1065


Mean log L2 = -5.9552202224731445

Epoch 32 in 78.42 sec
Train accuracy :	0.999	(59912/60000)		Train loss :	0.0088
Val accuracy   :	0.978	(9783/10000)		Val loss :	0.1111


Mean log L2 = -5.959669589996338

Epoch 33 in 78.59 sec
Train accuracy :	0.999	(59969/60000)		Train loss :	0.0044
Val accuracy   :	0.978	(9783/10000)		Val loss :	0.1186


Mean log L2 = -5.956935405731201

Epoch 34 in 84.92 sec
Train accuracy :	0.999	(59942/60000)		Train loss :	0.0066
Val accuracy   :	0.979	(9786/10000)		Val loss :	0.105


Mean log L2 = -5.962012767791748

Epoch 35 in 87.89 sec
Train accuracy :	1.0	(59989/60000)		Train loss :	0.0031
Val accuracy   :	0.978	(9784/10000)		Val loss :	0.1039


Mean log L2 = -5.894378185272217

Epoch 36 in 141.93 sec
Train accuracy :	0.999	(59967/60000)		Train loss :	0.0037
Val accuracy   :	0.978	(9781/10000)		Val loss :	0.1214


Mean log L2 = -5.9611430168151855

Epoch 37 in 83.41 sec
Train accuracy :	0.999	(59954/60000)		Train loss :	0.0049
Val accuracy   :	0.977	(9771/10000)		Val loss :	0.1237


Mean log L2 = -5.962324142456055

Epoch 38 in 83.93 sec
Train accuracy :	0.998	(59892/60000)		Train loss :	0.0095
Val accuracy   :	0.978	(9779/10000)		Val loss :	0.1055


Mean log L2 = -5.962032794952393

Epoch 39 in 84.39 sec
Train accuracy :	0.999	(59949/60000)		Train loss :	0.0049
Val accuracy   :	0.979	(9793/10000)		Val loss :	0.1054


Mean log L2 = -5.961164951324463

Epoch 40 in 84.04 sec
Train accuracy :	1.0	(59982/60000)		Train loss :	0.0033
Val accuracy   :	0.978	(9782/10000)		Val loss :	0.1154


Mean log L2 = -5.956282138824463

Epoch 41 in 84.59 sec
Train accuracy :	0.999	(59931/60000)		Train loss :	0.0067
Val accuracy   :	0.977	(9773/10000)		Val loss :	0.1235


Mean log L2 = -5.959702968597412

Epoch 42 in 84.65 sec
Train accuracy :	0.999	(59917/60000)		Train loss :	0.0078
Val accuracy   :	0.977	(9769/10000)		Val loss :	0.1155


Mean log L2 = -5.645227432250977

Epoch 43 in 87.23 sec
Train accuracy :	0.999	(59943/60000)		Train loss :	0.0062
Val accuracy   :	0.977	(9774/10000)		Val loss :	0.1143


Mean log L2 = -5.9605817794799805

Epoch 44 in 85.29 sec
Train accuracy :	0.998	(59904/60000)		Train loss :	0.0085
Val accuracy   :	0.977	(9774/10000)		Val loss :	0.1103


Mean log L2 = -5.958132743835449

Epoch 45 in 85.47 sec
Train accuracy :	0.999	(59949/60000)		Train loss :	0.005
Val accuracy   :	0.978	(9779/10000)		Val loss :	0.1079


Mean log L2 = -5.9586687088012695

Epoch 46 in 84.55 sec
Train accuracy :	0.998	(59864/60000)		Train loss :	0.013
Val accuracy   :	0.976	(9759/10000)		Val loss :	0.1315


Mean log L2 = -5.9640727043151855

Epoch 47 in 85.14 sec
Train accuracy :	1.0	(59975/60000)		Train loss :	0.0034
Val accuracy   :	0.979	(9792/10000)		Val loss :	0.107


Mean log L2 = -5.9667463302612305

Epoch 48 in 84.65 sec
Train accuracy :	1.0	(59982/60000)		Train loss :	0.0029
Val accuracy   :	0.978	(9782/10000)		Val loss :	0.114


Mean log L2 = -5.961541175842285

Epoch 49 in 82.75 sec
Train accuracy :	0.999	(59954/60000)		Train loss :	0.0046
Val accuracy   :	0.98	(9799/10000)		Val loss :	0.0989


Mean log L2 = -5.624286651611328

Epoch 50 in 82.79 sec
Train accuracy :	0.999	(59935/60000)		Train loss :	0.0054
Val accuracy   :	0.979	(9793/10000)		Val loss :	0.1068
