# Supplementary material
Source: ML conference proceedings conference paper supplement (https://proceedings.neurips.cc/paper_files/paper/2022/hash/545a114e655f9d25ba0d56ea9a01fc6e-Abstract.html)
Supplement: Supplementary file 1 [file 545a114e655f9d25ba0d56ea9a01fc6e-Supplemental-Conference.zip › revised_supplemental/code/results/table1/noise/classic_ep_1e-1/2022-08-01_18-22-13_xp_mlp_2h256_ep1_beta1e-1_noise4e-2_run1/log.txt]

python train.py simus/train/xp_mlp_ep1_noise_run1.json

Mean log L2 = -6.0

Epoch 1 in 794.83 sec
Train accuracy :	0.102	(6131/60000)		Train loss :	2.368
Val accuracy   :	0.101	(1010/10000)		Val loss :	2.3677


Mean log L2 = -6.0

Epoch 2 in 462.02 sec
Train accuracy :	0.099	(5918/60000)		Train loss :	2.3923
Val accuracy   :	0.096	(958/10000)		Val loss :	2.3925


Mean log L2 = -6.0

Epoch 3 in 461.56 sec
Train accuracy :	0.097	(5842/60000)		Train loss :	2.3414
Val accuracy   :	0.098	(982/10000)		Val loss :	2.3404


Mean log L2 = -6.0

Epoch 4 in 461.94 sec
Train accuracy :	0.099	(5958/60000)		Train loss :	2.4043
Val accuracy   :	0.103	(1032/10000)		Val loss :	2.399


Mean log L2 = -6.0

Epoch 5 in 462.02 sec
Train accuracy :	0.099	(5949/60000)		Train loss :	2.4094
Val accuracy   :	0.101	(1009/10000)		Val loss :	2.4084


Mean log L2 = -6.0

Epoch 6 in 461.94 sec
Train accuracy :	0.112	(6742/60000)		Train loss :	2.4053
Val accuracy   :	0.114	(1135/10000)		Val loss :	2.4045


Mean log L2 = -6.0

Epoch 7 in 461.88 sec
Train accuracy :	0.102	(6131/60000)		Train loss :	2.4812
Val accuracy   :	0.101	(1010/10000)		Val loss :	2.4809


Mean log L2 = -6.0

Epoch 8 in 461.67 sec
Train accuracy :	0.099	(5923/60000)		Train loss :	2.3181
Val accuracy   :	0.098	(980/10000)		Val loss :	2.3202


Mean log L2 = -6.0

Epoch 9 in 461.89 sec
Train accuracy :	0.112	(6742/60000)		Train loss :	2.4184
Val accuracy   :	0.114	(1135/10000)		Val loss :	2.4163


Mean log L2 = -6.0

Epoch 10 in 461.54 sec
Train accuracy :	0.102	(6131/60000)		Train loss :	2.4297
Val accuracy   :	0.101	(1010/10000)		Val loss :	2.4329


Mean log L2 = -6.0

Epoch 11 in 462.12 sec
Train accuracy :	0.098	(5851/60000)		Train loss :	2.3892
Val accuracy   :	0.097	(974/10000)		Val loss :	2.3909


Mean log L2 = -6.0

Epoch 12 in 456.84 sec
Train accuracy :	0.104	(6265/60000)		Train loss :	2.3423
Val accuracy   :	0.103	(1028/10000)		Val loss :	2.3408


Mean log L2 = -6.0

Epoch 13 in 449.65 sec
Train accuracy :	0.099	(5923/60000)		Train loss :	2.3959
Val accuracy   :	0.098	(980/10000)		Val loss :	2.3956


Mean log L2 = -6.0

Epoch 14 in 449.43 sec
Train accuracy :	0.099	(5958/60000)		Train loss :	2.3827
Val accuracy   :	0.103	(1032/10000)		Val loss :	2.3795


Mean log L2 = -6.0

Epoch 15 in 449.69 sec
Train accuracy :	0.104	(6265/60000)		Train loss :	2.3957
Val accuracy   :	0.103	(1028/10000)		Val loss :	2.3931


Mean log L2 = -6.0

Epoch 16 in 449.60 sec
Train accuracy :	0.099	(5923/60000)		Train loss :	2.4382
Val accuracy   :	0.098	(980/10000)		Val loss :	2.4417


Mean log L2 = -6.0

Epoch 17 in 449.18 sec
Train accuracy :	0.104	(6265/60000)		Train loss :	2.4991
Val accuracy   :	0.103	(1028/10000)		Val loss :	2.4984


Mean log L2 = -6.0

Epoch 18 in 449.50 sec
Train accuracy :	0.104	(6265/60000)		Train loss :	2.4109
Val accuracy   :	0.103	(1028/10000)		Val loss :	2.4143


Mean log L2 = -6.0

Epoch 19 in 449.67 sec
Train accuracy :	0.098	(5851/60000)		Train loss :	2.482
Val accuracy   :	0.097	(974/10000)		Val loss :	2.4864


Mean log L2 = -6.0

Epoch 20 in 449.18 sec
Train accuracy :	0.099	(5918/60000)		Train loss :	2.3931
Val accuracy   :	0.096	(958/10000)		Val loss :	2.3976


Mean log L2 = -6.0

Epoch 21 in 450.80 sec
Train accuracy :	0.097	(5842/60000)		Train loss :	2.4315
Val accuracy   :	0.098	(982/10000)		Val loss :	2.4339


Mean log L2 = -6.0

Epoch 22 in 449.68 sec
Train accuracy :	0.104	(6265/60000)		Train loss :	2.3577
Val accuracy   :	0.103	(1028/10000)		Val loss :	2.3624


Mean log L2 = -6.0

Epoch 23 in 449.17 sec
Train accuracy :	0.099	(5923/60000)		Train loss :	2.3884
Val accuracy   :	0.098	(980/10000)		Val loss :	2.3904


Mean log L2 = -6.0

Epoch 24 in 449.62 sec
Train accuracy :	0.099	(5923/60000)		Train loss :	2.3781
Val accuracy   :	0.098	(980/10000)		Val loss :	2.3788


Mean log L2 = -6.0

Epoch 25 in 449.35 sec
Train accuracy :	0.102	(6131/60000)		Train loss :	2.3755
Val accuracy   :	0.101	(1010/10000)		Val loss :	2.3768


Mean log L2 = -6.0

Epoch 26 in 449.32 sec
Train accuracy :	0.104	(6265/60000)		Train loss :	2.3723
Val accuracy   :	0.103	(1028/10000)		Val loss :	2.3739


Mean log L2 = -6.0

Epoch 27 in 449.73 sec
Train accuracy :	0.112	(6742/60000)		Train loss :	2.3827
Val accuracy   :	0.114	(1135/10000)		Val loss :	2.3824


Mean log L2 = -6.0

Epoch 28 in 449.49 sec
Train accuracy :	0.098	(5851/60000)		Train loss :	2.4206
Val accuracy   :	0.097	(974/10000)		Val loss :	2.4254


Mean log L2 = -6.0

Epoch 29 in 449.36 sec
Train accuracy :	0.099	(5949/60000)		Train loss :	2.3674
Val accuracy   :	0.101	(1009/10000)		Val loss :	2.3657


Mean log L2 = -6.0

Epoch 30 in 449.28 sec
Train accuracy :	0.097	(5842/60000)		Train loss :	2.3525
Val accuracy   :	0.098	(982/10000)		Val loss :	2.3545


Mean log L2 = -6.0

Epoch 31 in 449.67 sec
Train accuracy :	0.099	(5949/60000)		Train loss :	2.3718
Val accuracy   :	0.101	(1009/10000)		Val loss :	2.3741


Mean log L2 = -6.0

Epoch 32 in 449.62 sec
Train accuracy :	0.104	(6265/60000)		Train loss :	2.3731
Val accuracy   :	0.103	(1028/10000)		Val loss :	2.3747


Mean log L2 = -6.0

Epoch 33 in 449.33 sec
Train accuracy :	0.102	(6131/60000)		Train loss :	2.3539
Val accuracy   :	0.101	(1010/10000)		Val loss :	2.3558


Mean log L2 = -6.0

Epoch 34 in 449.51 sec
Train accuracy :	0.099	(5923/60000)		Train loss :	2.4128
Val accuracy   :	0.098	(980/10000)		Val loss :	2.4091


Mean log L2 = -6.0

Epoch 35 in 449.36 sec
Train accuracy :	0.099	(5923/60000)		Train loss :	2.3978
Val accuracy   :	0.098	(980/10000)		Val loss :	2.3973


Mean log L2 = -6.0

Epoch 36 in 449.43 sec
Train accuracy :	0.097	(5842/60000)		Train loss :	2.374
Val accuracy   :	0.098	(982/10000)		Val loss :	2.3743


Mean log L2 = -6.0

Epoch 37 in 449.39 sec
Train accuracy :	0.112	(6742/60000)		Train loss :	2.4255
Val accuracy   :	0.114	(1135/10000)		Val loss :	2.4241


Mean log L2 = -6.0

Epoch 38 in 456.67 sec
Train accuracy :	0.097	(5842/60000)		Train loss :	2.383
Val accuracy   :	0.098	(982/10000)		Val loss :	2.3873


Mean log L2 = -6.0

Epoch 39 in 456.07 sec
Train accuracy :	0.097	(5842/60000)		Train loss :	2.4191
Val accuracy   :	0.098	(982/10000)		Val loss :	2.4172


Mean log L2 = -6.0

Epoch 40 in 456.12 sec
Train accuracy :	0.104	(6265/60000)		Train loss :	2.3462
Val accuracy   :	0.103	(1028/10000)		Val loss :	2.3464


Mean log L2 = -6.0

Epoch 41 in 456.14 sec
Train accuracy :	0.099	(5958/60000)		Train loss :	2.3595
Val accuracy   :	0.103	(1032/10000)		Val loss :	2.3577


Mean log L2 = -6.0

Epoch 42 in 455.91 sec
Train accuracy :	0.098	(5851/60000)		Train loss :	2.3347
Val accuracy   :	0.097	(974/10000)		Val loss :	2.3345


Mean log L2 = -6.0

Epoch 43 in 456.15 sec
Train accuracy :	0.097	(5842/60000)		Train loss :	2.3732
Val accuracy   :	0.098	(982/10000)		Val loss :	2.3731


Mean log L2 = -6.0

Epoch 44 in 456.60 sec
Train accuracy :	0.098	(5851/60000)		Train loss :	2.3542
Val accuracy   :	0.097	(974/10000)		Val loss :	2.3534


Mean log L2 = -6.0

Epoch 45 in 456.08 sec
Train accuracy :	0.099	(5923/60000)		Train loss :	2.3815
Val accuracy   :	0.098	(980/10000)		Val loss :	2.3837


Mean log L2 = -6.0

Epoch 46 in 456.43 sec
Train accuracy :	0.099	(5958/60000)		Train loss :	2.3718
Val accuracy   :	0.103	(1032/10000)		Val loss :	2.3679


Mean log L2 = -6.0

Epoch 47 in 456.47 sec
Train accuracy :	0.104	(6265/60000)		Train loss :	2.3707
Val accuracy   :	0.103	(1028/10000)		Val loss :	2.3739


Mean log L2 = -6.0

Epoch 48 in 456.63 sec
Train accuracy :	0.104	(6265/60000)		Train loss :	2.4329
Val accuracy   :	0.103	(1028/10000)		Val loss :	2.43


Mean log L2 = -6.0

Epoch 49 in 456.24 sec
Train accuracy :	0.099	(5949/60000)		Train loss :	2.4039
Val accuracy   :	0.101	(1009/10000)		Val loss :	2.4038


Mean log L2 = -6.0

Epoch 50 in 451.55 sec
Train accuracy :	0.112	(6742/60000)		Train loss :	2.3698
Val accuracy   :	0.114	(1135/10000)		Val loss :	2.3695
