# Supplementary material
Source: ML conference proceedings conference paper supplement (https://proceedings.neurips.cc/paper_files/paper/2022/hash/545a114e655f9d25ba0d56ea9a01fc6e-Abstract.html)
Supplement: Supplementary file 1 [file 545a114e655f9d25ba0d56ea9a01fc6e-Supplemental-Conference.zip › revised_supplemental/code/results/table1/noise/classic_ep_1e-1/2022-08-01_18-22-13_xp_mlp_2h256_ep1_beta1e-1_noise4e-2_run2/log.txt]

python train.py simus/train/xp_mlp_ep1_noise_run2.json

Mean log L2 = -6.0

Epoch 1 in 793.64 sec
Train accuracy :	0.102	(6131/60000)		Train loss :	2.355
Val accuracy   :	0.101	(1010/10000)		Val loss :	2.3573


Mean log L2 = -6.0

Epoch 2 in 455.62 sec
Train accuracy :	0.099	(5918/60000)		Train loss :	2.3835
Val accuracy   :	0.096	(958/10000)		Val loss :	2.3835


Mean log L2 = -6.0

Epoch 3 in 454.40 sec
Train accuracy :	0.099	(5923/60000)		Train loss :	2.4515
Val accuracy   :	0.098	(980/10000)		Val loss :	2.4562


Mean log L2 = -6.0

Epoch 4 in 454.44 sec
Train accuracy :	0.099	(5923/60000)		Train loss :	2.3781
Val accuracy   :	0.098	(980/10000)		Val loss :	2.3824


Mean log L2 = -6.0

Epoch 5 in 454.49 sec
Train accuracy :	0.099	(5949/60000)		Train loss :	2.3725
Val accuracy   :	0.101	(1009/10000)		Val loss :	2.3722


Mean log L2 = -6.0

Epoch 6 in 454.81 sec
Train accuracy :	0.099	(5958/60000)		Train loss :	2.3392
Val accuracy   :	0.103	(1032/10000)		Val loss :	2.3357


Mean log L2 = -6.0

Epoch 7 in 454.59 sec
Train accuracy :	0.099	(5923/60000)		Train loss :	2.4724
Val accuracy   :	0.098	(980/10000)		Val loss :	2.4694


Mean log L2 = -6.0

Epoch 8 in 454.57 sec
Train accuracy :	0.099	(5958/60000)		Train loss :	2.4384
Val accuracy   :	0.103	(1032/10000)		Val loss :	2.4369


Mean log L2 = -6.0

Epoch 9 in 454.51 sec
Train accuracy :	0.099	(5918/60000)		Train loss :	2.3668
Val accuracy   :	0.096	(958/10000)		Val loss :	2.372


Mean log L2 = -6.0

Epoch 10 in 454.88 sec
Train accuracy :	0.102	(6131/60000)		Train loss :	2.3902
Val accuracy   :	0.101	(1010/10000)		Val loss :	2.3874


Mean log L2 = -6.0

Epoch 11 in 454.47 sec
Train accuracy :	0.099	(5918/60000)		Train loss :	2.3653
Val accuracy   :	0.096	(958/10000)		Val loss :	2.3698


Mean log L2 = -6.0

Epoch 12 in 450.86 sec
Train accuracy :	0.102	(6131/60000)		Train loss :	2.3533
Val accuracy   :	0.101	(1010/10000)		Val loss :	2.3576


Mean log L2 = -6.0

Epoch 13 in 441.09 sec
Train accuracy :	0.104	(6265/60000)		Train loss :	2.3441
Val accuracy   :	0.103	(1028/10000)		Val loss :	2.3417


Mean log L2 = -6.0

Epoch 14 in 441.19 sec
Train accuracy :	0.097	(5842/60000)		Train loss :	2.3291
Val accuracy   :	0.098	(982/10000)		Val loss :	2.3295


Mean log L2 = -6.0

Epoch 15 in 441.69 sec
Train accuracy :	0.112	(6742/60000)		Train loss :	2.3575
Val accuracy   :	0.114	(1135/10000)		Val loss :	2.3562


Mean log L2 = -6.0

Epoch 16 in 441.27 sec
Train accuracy :	0.112	(6742/60000)		Train loss :	2.3865
Val accuracy   :	0.114	(1135/10000)		Val loss :	2.3832


Mean log L2 = -6.0

Epoch 17 in 441.14 sec
Train accuracy :	0.09	(5421/60000)		Train loss :	2.4291
Val accuracy   :	0.089	(892/10000)		Val loss :	2.432


Mean log L2 = -6.0

Epoch 18 in 441.59 sec
Train accuracy :	0.099	(5949/60000)		Train loss :	2.3592
Val accuracy   :	0.101	(1009/10000)		Val loss :	2.3581


Mean log L2 = -6.0

Epoch 19 in 441.67 sec
Train accuracy :	0.112	(6742/60000)		Train loss :	2.4774
Val accuracy   :	0.114	(1135/10000)		Val loss :	2.4779


Mean log L2 = -6.0

Epoch 20 in 441.22 sec
Train accuracy :	0.112	(6742/60000)		Train loss :	2.3534
Val accuracy   :	0.114	(1135/10000)		Val loss :	2.3515


Mean log L2 = -6.0

Epoch 21 in 441.45 sec
Train accuracy :	0.112	(6742/60000)		Train loss :	2.3611
Val accuracy   :	0.114	(1135/10000)		Val loss :	2.3575


Mean log L2 = -6.0

Epoch 22 in 441.72 sec
Train accuracy :	0.099	(5949/60000)		Train loss :	2.4304
Val accuracy   :	0.101	(1009/10000)		Val loss :	2.43


Mean log L2 = -6.0

Epoch 23 in 441.38 sec
Train accuracy :	0.104	(6265/60000)		Train loss :	2.3876
Val accuracy   :	0.103	(1028/10000)		Val loss :	2.3849


Mean log L2 = -6.0

Epoch 24 in 441.35 sec
Train accuracy :	0.104	(6265/60000)		Train loss :	2.4026
Val accuracy   :	0.103	(1028/10000)		Val loss :	2.4031


Mean log L2 = -6.0

Epoch 25 in 441.38 sec
Train accuracy :	0.104	(6265/60000)		Train loss :	2.4168
Val accuracy   :	0.103	(1028/10000)		Val loss :	2.4191


Mean log L2 = -6.0

Epoch 26 in 441.27 sec
Train accuracy :	0.099	(5958/60000)		Train loss :	2.42
Val accuracy   :	0.103	(1032/10000)		Val loss :	2.415


Mean log L2 = -6.0

Epoch 27 in 441.58 sec
Train accuracy :	0.099	(5923/60000)		Train loss :	2.3347
Val accuracy   :	0.098	(980/10000)		Val loss :	2.3364


Mean log L2 = -6.0

Epoch 28 in 441.71 sec
Train accuracy :	0.098	(5851/60000)		Train loss :	2.3791
Val accuracy   :	0.097	(974/10000)		Val loss :	2.3809


Mean log L2 = -6.0

Epoch 29 in 441.33 sec
Train accuracy :	0.102	(6131/60000)		Train loss :	2.3932
Val accuracy   :	0.101	(1010/10000)		Val loss :	2.3944


Mean log L2 = -6.0

Epoch 30 in 441.53 sec
Train accuracy :	0.099	(5958/60000)		Train loss :	2.3724
Val accuracy   :	0.103	(1032/10000)		Val loss :	2.3713


Mean log L2 = -6.0

Epoch 31 in 441.29 sec
Train accuracy :	0.099	(5923/60000)		Train loss :	2.3449
Val accuracy   :	0.098	(980/10000)		Val loss :	2.3454


Mean log L2 = -6.0

Epoch 32 in 441.77 sec
Train accuracy :	0.112	(6742/60000)		Train loss :	2.4162
Val accuracy   :	0.114	(1135/10000)		Val loss :	2.4128


Mean log L2 = -6.0

Epoch 33 in 442.04 sec
Train accuracy :	0.099	(5918/60000)		Train loss :	2.358
Val accuracy   :	0.096	(958/10000)		Val loss :	2.3587


Mean log L2 = -6.0

Epoch 34 in 442.22 sec
Train accuracy :	0.097	(5842/60000)		Train loss :	2.4237
Val accuracy   :	0.098	(982/10000)		Val loss :	2.4229


Mean log L2 = -6.0

Epoch 35 in 441.90 sec
Train accuracy :	0.09	(5421/60000)		Train loss :	2.3605
Val accuracy   :	0.089	(892/10000)		Val loss :	2.3595


Mean log L2 = -6.0

Epoch 36 in 441.90 sec
Train accuracy :	0.098	(5851/60000)		Train loss :	2.3643
Val accuracy   :	0.097	(974/10000)		Val loss :	2.363


Mean log L2 = -6.0

Epoch 37 in 442.17 sec
Train accuracy :	0.099	(5918/60000)		Train loss :	2.4198
Val accuracy   :	0.096	(958/10000)		Val loss :	2.4228


Mean log L2 = -6.0

Epoch 38 in 444.04 sec
Train accuracy :	0.102	(6131/60000)		Train loss :	2.3823
Val accuracy   :	0.101	(1010/10000)		Val loss :	2.3817


Mean log L2 = -6.0

Epoch 39 in 449.57 sec
Train accuracy :	0.099	(5958/60000)		Train loss :	2.3199
Val accuracy   :	0.103	(1032/10000)		Val loss :	2.3194


Mean log L2 = -6.0

Epoch 40 in 448.67 sec
Train accuracy :	0.104	(6265/60000)		Train loss :	2.3924
Val accuracy   :	0.103	(1028/10000)		Val loss :	2.3911


Mean log L2 = -6.0

Epoch 41 in 449.00 sec
Train accuracy :	0.112	(6742/60000)		Train loss :	2.3332
Val accuracy   :	0.114	(1135/10000)		Val loss :	2.331


Mean log L2 = -6.0

Epoch 42 in 448.64 sec
Train accuracy :	0.099	(5958/60000)		Train loss :	2.4283
Val accuracy   :	0.103	(1032/10000)		Val loss :	2.4269


Mean log L2 = -6.0

Epoch 43 in 448.56 sec
Train accuracy :	0.099	(5918/60000)		Train loss :	2.4394
Val accuracy   :	0.096	(958/10000)		Val loss :	2.4435


Mean log L2 = -6.0

Epoch 44 in 449.12 sec
Train accuracy :	0.102	(6131/60000)		Train loss :	2.3749
Val accuracy   :	0.101	(1010/10000)		Val loss :	2.3722


Mean log L2 = -6.0

Epoch 45 in 449.16 sec
Train accuracy :	0.099	(5958/60000)		Train loss :	2.3368
Val accuracy   :	0.103	(1032/10000)		Val loss :	2.3331


Mean log L2 = -6.0

Epoch 46 in 448.93 sec
Train accuracy :	0.099	(5949/60000)		Train loss :	2.3234
Val accuracy   :	0.101	(1009/10000)		Val loss :	2.3219


Mean log L2 = -6.0

Epoch 47 in 448.73 sec
Train accuracy :	0.102	(6131/60000)		Train loss :	2.3566
Val accuracy   :	0.101	(1010/10000)		Val loss :	2.3579


Mean log L2 = -6.0

Epoch 48 in 448.64 sec
Train accuracy :	0.112	(6742/60000)		Train loss :	2.3704
Val accuracy   :	0.114	(1135/10000)		Val loss :	2.3684


Mean log L2 = -6.0

Epoch 49 in 449.03 sec
Train accuracy :	0.112	(6742/60000)		Train loss :	2.3667
Val accuracy   :	0.114	(1135/10000)		Val loss :	2.3685


Mean log L2 = -6.0

Epoch 50 in 448.88 sec
Train accuracy :	0.099	(5923/60000)		Train loss :	2.369
Val accuracy   :	0.098	(980/10000)		Val loss :	2.3679
