# Supplementary material
Source: ML conference proceedings conference paper supplement (https://proceedings.neurips.cc/paper_files/paper/2022/hash/545a114e655f9d25ba0d56ea9a01fc6e-Abstract.html)
Supplement: Supplementary file 1 [file 545a114e655f9d25ba0d56ea9a01fc6e-Supplemental-Conference.zip › revised_supplemental/code/results/table1/noise/classic_ep_1e-1/2022-08-01_18-22-15_xp_mlp_2h256_ep1_beta1e-1_noise4e-2_run3/hyperparameters.json]

{
    "name": "xp_mlp_2h256_ep1_beta1e-1_noise4e-2_run3",
    "model_type": "xp_mlp",
    "task": "mnist",
    "seed": 2,
    "batch_size": 20,
    "in_size": 784,
    "n_targets": 10,
    "archi": {
        "xphi/~/fc_1": {
            "fc": 256,
            "lr": 0.05
        },
        "xphi/~/fc_2": {
            "fc": 256,
            "lr": 0.05
        },
        "xphi/~/fc_3": {
            "fc": 10,
            "lr": 0.05
        }
    },
    "activation": "my_sigmoid",
    "a": -4,
    "b": 2,
    "algo": "EP",
    "epochs": 50,
    "beta": 0.1,
    "T1": 350,
    "T2": 350,
    "N": 1,
    "noise": 0.04,
    "save": true,
    "save_model": false
}
