# Supplementary material
Source: ML conference proceedings conference paper supplement (https://proceedings.neurips.cc/paper_files/paper/2022/hash/545a114e655f9d25ba0d56ea9a01fc6e-Abstract.html)
Supplement: Supplementary file 1 [file 545a114e655f9d25ba0d56ea9a01fc6e-Supplemental-Conference.zip › revised_supplemental/code/results/table1/noise/classic_ep_1e-1/2022-08-01_18-22-15_xp_mlp_2h256_ep1_beta1e-1_noise4e-2_run3/log.txt]

python train.py simus/train/xp_mlp_ep1_noise_run3.json

Mean log L2 = -6.0

Epoch 1 in 812.15 sec
Train accuracy :	0.099	(5918/60000)		Train loss :	2.4208
Val accuracy   :	0.096	(958/10000)		Val loss :	2.4254


Mean log L2 = -6.0

Epoch 2 in 478.51 sec
Train accuracy :	0.102	(6131/60000)		Train loss :	2.3563
Val accuracy   :	0.101	(1010/10000)		Val loss :	2.3565


Mean log L2 = -6.0

Epoch 3 in 478.37 sec
Train accuracy :	0.099	(5949/60000)		Train loss :	2.5153
Val accuracy   :	0.101	(1009/10000)		Val loss :	2.5071


Mean log L2 = -6.0

Epoch 4 in 478.31 sec
Train accuracy :	0.098	(5851/60000)		Train loss :	2.3694
Val accuracy   :	0.097	(974/10000)		Val loss :	2.3663


Mean log L2 = -6.0

Epoch 5 in 478.37 sec
Train accuracy :	0.099	(5958/60000)		Train loss :	2.3806
Val accuracy   :	0.103	(1032/10000)		Val loss :	2.3762


Mean log L2 = -6.0

Epoch 6 in 478.25 sec
Train accuracy :	0.09	(5421/60000)		Train loss :	2.434
Val accuracy   :	0.089	(892/10000)		Val loss :	2.4338


Mean log L2 = -6.0

Epoch 7 in 478.46 sec
Train accuracy :	0.099	(5949/60000)		Train loss :	2.3607
Val accuracy   :	0.101	(1009/10000)		Val loss :	2.3589


Mean log L2 = -6.0

Epoch 8 in 478.53 sec
Train accuracy :	0.099	(5949/60000)		Train loss :	2.4016
Val accuracy   :	0.101	(1009/10000)		Val loss :	2.3968


Mean log L2 = -6.0

Epoch 9 in 478.46 sec
Train accuracy :	0.102	(6131/60000)		Train loss :	2.3575
Val accuracy   :	0.101	(1010/10000)		Val loss :	2.3574


Mean log L2 = -6.0

Epoch 10 in 478.48 sec
Train accuracy :	0.099	(5923/60000)		Train loss :	2.4255
Val accuracy   :	0.098	(980/10000)		Val loss :	2.4279


Mean log L2 = -6.0

Epoch 11 in 478.48 sec
Train accuracy :	0.112	(6742/60000)		Train loss :	2.4406
Val accuracy   :	0.114	(1135/10000)		Val loss :	2.4389


Mean log L2 = -6.0

Epoch 12 in 468.15 sec
Train accuracy :	0.099	(5958/60000)		Train loss :	2.3696
Val accuracy   :	0.103	(1032/10000)		Val loss :	2.369


Mean log L2 = -6.0

Epoch 13 in 466.01 sec
Train accuracy :	0.104	(6265/60000)		Train loss :	2.3899
Val accuracy   :	0.103	(1028/10000)		Val loss :	2.3906


Mean log L2 = -6.0

Epoch 14 in 466.15 sec
Train accuracy :	0.098	(5851/60000)		Train loss :	2.3959
Val accuracy   :	0.097	(974/10000)		Val loss :	2.3918


Mean log L2 = -6.0

Epoch 15 in 465.92 sec
Train accuracy :	0.099	(5958/60000)		Train loss :	2.3973
Val accuracy   :	0.103	(1032/10000)		Val loss :	2.3944


Mean log L2 = -6.0

Epoch 16 in 466.21 sec
Train accuracy :	0.099	(5949/60000)		Train loss :	2.4633
Val accuracy   :	0.101	(1009/10000)		Val loss :	2.4667


Mean log L2 = -6.0

Epoch 17 in 465.93 sec
Train accuracy :	0.099	(5918/60000)		Train loss :	2.3857
Val accuracy   :	0.096	(958/10000)		Val loss :	2.3897


Mean log L2 = -6.0

Epoch 18 in 465.98 sec
Train accuracy :	0.112	(6742/60000)		Train loss :	2.4741
Val accuracy   :	0.114	(1135/10000)		Val loss :	2.4715


Mean log L2 = -6.0

Epoch 19 in 466.01 sec
Train accuracy :	0.102	(6131/60000)		Train loss :	2.4288
Val accuracy   :	0.101	(1010/10000)		Val loss :	2.4318


Mean log L2 = -6.0

Epoch 20 in 465.99 sec
Train accuracy :	0.112	(6742/60000)		Train loss :	2.4362
Val accuracy   :	0.114	(1135/10000)		Val loss :	2.4382


Mean log L2 = -6.0

Epoch 21 in 465.93 sec
Train accuracy :	0.112	(6742/60000)		Train loss :	2.5106
Val accuracy   :	0.114	(1135/10000)		Val loss :	2.5063


Mean log L2 = -6.0

Epoch 22 in 465.84 sec
Train accuracy :	0.099	(5918/60000)		Train loss :	2.4904
Val accuracy   :	0.096	(958/10000)		Val loss :	2.4908


Mean log L2 = -6.0

Epoch 23 in 465.81 sec
Train accuracy :	0.099	(5949/60000)		Train loss :	2.3764
Val accuracy   :	0.101	(1009/10000)		Val loss :	2.3756


Mean log L2 = -6.0

Epoch 24 in 465.80 sec
Train accuracy :	0.099	(5949/60000)		Train loss :	2.3646
Val accuracy   :	0.101	(1009/10000)		Val loss :	2.3635


Mean log L2 = -6.0

Epoch 25 in 465.72 sec
Train accuracy :	0.099	(5949/60000)		Train loss :	2.3673
Val accuracy   :	0.101	(1009/10000)		Val loss :	2.3664


Mean log L2 = -6.0

Epoch 26 in 465.95 sec
Train accuracy :	0.098	(5851/60000)		Train loss :	2.3638
Val accuracy   :	0.097	(974/10000)		Val loss :	2.3633


Mean log L2 = -6.0

Epoch 27 in 465.83 sec
Train accuracy :	0.099	(5958/60000)		Train loss :	2.4384
Val accuracy   :	0.103	(1032/10000)		Val loss :	2.4324


Mean log L2 = -6.0

Epoch 28 in 465.87 sec
Train accuracy :	0.098	(5851/60000)		Train loss :	2.4397
Val accuracy   :	0.097	(974/10000)		Val loss :	2.4412


Mean log L2 = -6.0

Epoch 29 in 465.90 sec
Train accuracy :	0.102	(6131/60000)		Train loss :	2.3569
Val accuracy   :	0.101	(1010/10000)		Val loss :	2.3547


Mean log L2 = -6.0

Epoch 30 in 466.21 sec
Train accuracy :	0.112	(6742/60000)		Train loss :	2.4743
Val accuracy   :	0.114	(1135/10000)		Val loss :	2.4708


Mean log L2 = -6.0

Epoch 31 in 466.01 sec
Train accuracy :	0.102	(6131/60000)		Train loss :	2.5627
Val accuracy   :	0.101	(1010/10000)		Val loss :	2.5654


Mean log L2 = -6.0

Epoch 32 in 466.01 sec
Train accuracy :	0.102	(6131/60000)		Train loss :	2.3628
Val accuracy   :	0.101	(1010/10000)		Val loss :	2.3589


Mean log L2 = -6.0

Epoch 33 in 466.11 sec
Train accuracy :	0.112	(6742/60000)		Train loss :	2.4504
Val accuracy   :	0.114	(1135/10000)		Val loss :	2.4453


Mean log L2 = -6.0

Epoch 34 in 466.07 sec
Train accuracy :	0.099	(5918/60000)		Train loss :	2.3818
Val accuracy   :	0.096	(958/10000)		Val loss :	2.3855


Mean log L2 = -6.0

Epoch 35 in 466.26 sec
Train accuracy :	0.098	(5851/60000)		Train loss :	2.4292
Val accuracy   :	0.097	(974/10000)		Val loss :	2.4321


Mean log L2 = -6.0

Epoch 36 in 466.81 sec
Train accuracy :	0.104	(6265/60000)		Train loss :	2.3632
Val accuracy   :	0.103	(1028/10000)		Val loss :	2.3636


Mean log L2 = -6.0

Epoch 37 in 474.11 sec
Train accuracy :	0.099	(5949/60000)		Train loss :	2.4018
Val accuracy   :	0.101	(1009/10000)		Val loss :	2.4


Mean log L2 = -6.0

Epoch 38 in 473.03 sec
Train accuracy :	0.09	(5421/60000)		Train loss :	2.4437
Val accuracy   :	0.089	(892/10000)		Val loss :	2.4435


Mean log L2 = -6.0

Epoch 39 in 472.69 sec
Train accuracy :	0.09	(5421/60000)		Train loss :	2.3479
Val accuracy   :	0.089	(892/10000)		Val loss :	2.3505


Mean log L2 = -6.0

Epoch 40 in 472.78 sec
Train accuracy :	0.099	(5949/60000)		Train loss :	2.3798
Val accuracy   :	0.101	(1009/10000)		Val loss :	2.3766


Mean log L2 = -6.0

Epoch 41 in 472.81 sec
Train accuracy :	0.099	(5918/60000)		Train loss :	2.3443
Val accuracy   :	0.096	(958/10000)		Val loss :	2.3447


Mean log L2 = -6.0

Epoch 42 in 473.01 sec
Train accuracy :	0.099	(5958/60000)		Train loss :	2.3792
Val accuracy   :	0.103	(1032/10000)		Val loss :	2.3752


Mean log L2 = -6.0

Epoch 43 in 472.91 sec
Train accuracy :	0.099	(5923/60000)		Train loss :	2.4353
Val accuracy   :	0.098	(980/10000)		Val loss :	2.4327


Mean log L2 = -6.0

Epoch 44 in 472.90 sec
Train accuracy :	0.102	(6131/60000)		Train loss :	2.5094
Val accuracy   :	0.101	(1010/10000)		Val loss :	2.5102


Mean log L2 = -6.0

Epoch 45 in 472.77 sec
Train accuracy :	0.097	(5842/60000)		Train loss :	2.3828
Val accuracy   :	0.098	(982/10000)		Val loss :	2.385


Mean log L2 = -6.0

Epoch 46 in 472.92 sec
Train accuracy :	0.097	(5842/60000)		Train loss :	2.3958
Val accuracy   :	0.098	(982/10000)		Val loss :	2.3917


Mean log L2 = -6.0

Epoch 47 in 472.35 sec
Train accuracy :	0.09	(5421/60000)		Train loss :	2.4068
Val accuracy   :	0.089	(892/10000)		Val loss :	2.4063


Mean log L2 = -6.0

Epoch 48 in 469.64 sec
Train accuracy :	0.09	(5421/60000)		Train loss :	2.3915
Val accuracy   :	0.089	(892/10000)		Val loss :	2.3929


Mean log L2 = -6.0

Epoch 49 in 457.99 sec
Train accuracy :	0.102	(6131/60000)		Train loss :	2.3618
Val accuracy   :	0.101	(1010/10000)		Val loss :	2.3645


Mean log L2 = -6.0

Epoch 50 in 454.46 sec
Train accuracy :	0.099	(5958/60000)		Train loss :	2.4274
Val accuracy   :	0.103	(1032/10000)		Val loss :	2.4221
