# Supplementary material
Source: ML conference proceedings conference paper supplement (https://proceedings.neurips.cc/paper_files/paper/2022/hash/545a114e655f9d25ba0d56ea9a01fc6e-Abstract.html)
Supplement: Supplementary file 1 [file 545a114e655f9d25ba0d56ea9a01fc6e-Supplemental-Conference.zip › revised_supplemental/code/results/table1/noise/classic_ep_4e-1/2022-08-01_17-35-33_xp_mlp_2h256_ep1_beta4e-1_noise4e-2_run1/log.txt]

python train.py simus/train/xp_mlp_ep1_noise_run1.json

Mean log L2 = -5.9822492599487305

Epoch 1 in 777.82 sec
Train accuracy :	0.903	(54192/60000)		Train loss :	0.3452
Val accuracy   :	0.903	(9030/10000)		Val loss :	0.3399


Mean log L2 = -5.989458084106445

Epoch 2 in 462.00 sec
Train accuracy :	0.934	(56050/60000)		Train loss :	0.2308
Val accuracy   :	0.932	(9325/10000)		Val loss :	0.2344


Mean log L2 = -5.994085788726807

Epoch 3 in 461.69 sec
Train accuracy :	0.941	(56459/60000)		Train loss :	0.2046
Val accuracy   :	0.94	(9398/10000)		Val loss :	0.2098


Mean log L2 = -5.994739532470703

Epoch 4 in 461.67 sec
Train accuracy :	0.929	(55759/60000)		Train loss :	0.2392
Val accuracy   :	0.928	(9282/10000)		Val loss :	0.246


Mean log L2 = -5.99282693862915

Epoch 5 in 461.61 sec
Train accuracy :	0.948	(56885/60000)		Train loss :	0.1759
Val accuracy   :	0.946	(9463/10000)		Val loss :	0.187


Mean log L2 = -5.995400428771973

Epoch 6 in 461.84 sec
Train accuracy :	0.95	(57020/60000)		Train loss :	0.1731
Val accuracy   :	0.95	(9496/10000)		Val loss :	0.1845


Mean log L2 = -5.990555286407471

Epoch 7 in 461.73 sec
Train accuracy :	0.927	(55646/60000)		Train loss :	0.2492
Val accuracy   :	0.924	(9239/10000)		Val loss :	0.2696


Mean log L2 = -5.9987406730651855

Epoch 8 in 461.66 sec
Train accuracy :	0.939	(56363/60000)		Train loss :	0.212
Val accuracy   :	0.937	(9369/10000)		Val loss :	0.2192


Mean log L2 = -5.998327255249023

Epoch 9 in 461.77 sec
Train accuracy :	0.947	(56843/60000)		Train loss :	0.1835
Val accuracy   :	0.944	(9440/10000)		Val loss :	0.1977


Mean log L2 = -5.998267650604248

Epoch 10 in 461.63 sec
Train accuracy :	0.897	(53797/60000)		Train loss :	0.3378
Val accuracy   :	0.89	(8903/10000)		Val loss :	0.3639


Mean log L2 = -5.994255065917969

Epoch 11 in 461.53 sec
Train accuracy :	0.953	(57190/60000)		Train loss :	0.1705
Val accuracy   :	0.949	(9494/10000)		Val loss :	0.1943


Mean log L2 = -5.993655681610107

Epoch 12 in 455.47 sec
Train accuracy :	0.961	(57633/60000)		Train loss :	0.1295
Val accuracy   :	0.954	(9539/10000)		Val loss :	0.1569


Mean log L2 = -5.997527122497559

Epoch 13 in 410.93 sec
Train accuracy :	0.95	(57026/60000)		Train loss :	0.1708
Val accuracy   :	0.944	(9437/10000)		Val loss :	0.1965


Mean log L2 = -5.998558044433594

Epoch 14 in 403.16 sec
Train accuracy :	0.935	(56087/60000)		Train loss :	0.2161
Val accuracy   :	0.933	(9331/10000)		Val loss :	0.2236


Mean log L2 = -5.998108386993408

Epoch 15 in 403.70 sec
Train accuracy :	0.971	(58256/60000)		Train loss :	0.0988
Val accuracy   :	0.962	(9619/10000)		Val loss :	0.1292


Mean log L2 = -5.993449687957764

Epoch 16 in 403.50 sec
Train accuracy :	0.966	(57956/60000)		Train loss :	0.1156
Val accuracy   :	0.958	(9581/10000)		Val loss :	0.1461


Mean log L2 = -5.99813985824585

Epoch 17 in 403.49 sec
Train accuracy :	0.968	(58062/60000)		Train loss :	0.1092
Val accuracy   :	0.961	(9605/10000)		Val loss :	0.1405


Mean log L2 = -5.998429298400879

Epoch 18 in 403.47 sec
Train accuracy :	0.961	(57658/60000)		Train loss :	0.1321
Val accuracy   :	0.956	(9561/10000)		Val loss :	0.1601


Mean log L2 = -5.996068477630615

Epoch 19 in 403.69 sec
Train accuracy :	0.97	(58188/60000)		Train loss :	0.0988
Val accuracy   :	0.962	(9617/10000)		Val loss :	0.1347


Mean log L2 = -5.998562812805176

Epoch 20 in 403.50 sec
Train accuracy :	0.947	(56847/60000)		Train loss :	0.1768
Val accuracy   :	0.939	(9387/10000)		Val loss :	0.2107


Mean log L2 = -5.997732639312744

Epoch 21 in 403.43 sec
Train accuracy :	0.968	(58105/60000)		Train loss :	0.1052
Val accuracy   :	0.96	(9598/10000)		Val loss :	0.1386


Mean log L2 = -5.994694709777832

Epoch 22 in 403.70 sec
Train accuracy :	0.971	(58252/60000)		Train loss :	0.1028
Val accuracy   :	0.962	(9623/10000)		Val loss :	0.1373


Mean log L2 = -5.996881008148193

Epoch 23 in 403.13 sec
Train accuracy :	0.966	(57982/60000)		Train loss :	0.1116
Val accuracy   :	0.954	(9542/10000)		Val loss :	0.1605


Mean log L2 = -5.995694637298584

Epoch 24 in 404.21 sec
Train accuracy :	0.963	(57797/60000)		Train loss :	0.1312
Val accuracy   :	0.95	(9498/10000)		Val loss :	0.1763


Mean log L2 = -5.995407581329346

Epoch 25 in 403.43 sec
Train accuracy :	0.969	(58169/60000)		Train loss :	0.0966
Val accuracy   :	0.96	(9597/10000)		Val loss :	0.1358


Mean log L2 = -5.997811794281006

Epoch 26 in 403.54 sec
Train accuracy :	0.965	(57907/60000)		Train loss :	0.1125
Val accuracy   :	0.954	(9544/10000)		Val loss :	0.1539


Mean log L2 = -5.994020462036133

Epoch 27 in 402.78 sec
Train accuracy :	0.973	(58390/60000)		Train loss :	0.0914
Val accuracy   :	0.963	(9626/10000)		Val loss :	0.1378


Mean log L2 = -5.996650218963623

Epoch 28 in 403.92 sec
Train accuracy :	0.967	(57995/60000)		Train loss :	0.1145
Val accuracy   :	0.957	(9569/10000)		Val loss :	0.1481


Mean log L2 = -5.997059345245361

Epoch 29 in 404.04 sec
Train accuracy :	0.949	(56937/60000)		Train loss :	0.174
Val accuracy   :	0.937	(9371/10000)		Val loss :	0.2294


Mean log L2 = -5.997595310211182

Epoch 30 in 404.35 sec
Train accuracy :	0.966	(57970/60000)		Train loss :	0.1213
Val accuracy   :	0.955	(9551/10000)		Val loss :	0.1615


Mean log L2 = -5.995179653167725

Epoch 31 in 403.36 sec
Train accuracy :	0.966	(57970/60000)		Train loss :	0.1187
Val accuracy   :	0.957	(9573/10000)		Val loss :	0.155


Mean log L2 = -5.998990058898926

Epoch 32 in 403.54 sec
Train accuracy :	0.941	(56466/60000)		Train loss :	0.2034
Val accuracy   :	0.93	(9296/10000)		Val loss :	0.2485


Mean log L2 = -5.9963483810424805

Epoch 33 in 403.88 sec
Train accuracy :	0.947	(56795/60000)		Train loss :	0.1975
Val accuracy   :	0.936	(9356/10000)		Val loss :	0.2408


Mean log L2 = -5.99571418762207

Epoch 34 in 403.52 sec
Train accuracy :	0.967	(58022/60000)		Train loss :	0.1108
Val accuracy   :	0.957	(9568/10000)		Val loss :	0.1507


Mean log L2 = -5.9984025955200195

Epoch 35 in 403.62 sec
Train accuracy :	0.975	(58497/60000)		Train loss :	0.0836
Val accuracy   :	0.964	(9636/10000)		Val loss :	0.1312


Mean log L2 = -5.995379447937012

Epoch 36 in 403.27 sec
Train accuracy :	0.963	(57757/60000)		Train loss :	0.1216
Val accuracy   :	0.956	(9558/10000)		Val loss :	0.1579


Mean log L2 = -5.9927239418029785

Epoch 37 in 403.72 sec
Train accuracy :	0.952	(57131/60000)		Train loss :	0.1662
Val accuracy   :	0.942	(9423/10000)		Val loss :	0.2168


Mean log L2 = -5.985771179199219

Epoch 38 in 403.06 sec
Train accuracy :	0.891	(53431/60000)		Train loss :	0.4475
Val accuracy   :	0.886	(8857/10000)		Val loss :	0.4889


Mean log L2 = -5.994421005249023

Epoch 39 in 403.04 sec
Train accuracy :	0.971	(58246/60000)		Train loss :	0.0987
Val accuracy   :	0.961	(9613/10000)		Val loss :	0.1373


Mean log L2 = -5.997847080230713

Epoch 40 in 403.40 sec
Train accuracy :	0.976	(58552/60000)		Train loss :	0.076
Val accuracy   :	0.963	(9634/10000)		Val loss :	0.1227


Mean log L2 = -5.993762493133545

Epoch 41 in 403.30 sec
Train accuracy :	0.971	(58284/60000)		Train loss :	0.0963
Val accuracy   :	0.963	(9625/10000)		Val loss :	0.1462


Mean log L2 = -5.9983086585998535

Epoch 42 in 403.73 sec
Train accuracy :	0.976	(58561/60000)		Train loss :	0.0795
Val accuracy   :	0.964	(9640/10000)		Val loss :	0.1318


Mean log L2 = -5.994663715362549

Epoch 43 in 403.42 sec
Train accuracy :	0.971	(58230/60000)		Train loss :	0.0965
Val accuracy   :	0.961	(9605/10000)		Val loss :	0.1489


Mean log L2 = -5.998128890991211

Epoch 44 in 403.61 sec
Train accuracy :	0.956	(57354/60000)		Train loss :	0.1531
Val accuracy   :	0.946	(9463/10000)		Val loss :	0.19


Mean log L2 = -5.99762487411499

Epoch 45 in 403.22 sec
Train accuracy :	0.978	(58672/60000)		Train loss :	0.0758
Val accuracy   :	0.965	(9649/10000)		Val loss :	0.1241


Mean log L2 = -5.996856212615967

Epoch 46 in 404.31 sec
Train accuracy :	0.982	(58907/60000)		Train loss :	0.0624
Val accuracy   :	0.971	(9710/10000)		Val loss :	0.1079


Mean log L2 = -5.997452735900879

Epoch 47 in 403.61 sec
Train accuracy :	0.969	(58146/60000)		Train loss :	0.1049
Val accuracy   :	0.958	(9579/10000)		Val loss :	0.157


Mean log L2 = -5.998696327209473

Epoch 48 in 403.38 sec
Train accuracy :	0.978	(58667/60000)		Train loss :	0.0749
Val accuracy   :	0.965	(9651/10000)		Val loss :	0.1186


Mean log L2 = -5.999678134918213

Epoch 49 in 403.82 sec
Train accuracy :	0.974	(58468/60000)		Train loss :	0.0852
Val accuracy   :	0.961	(9606/10000)		Val loss :	0.1378


Mean log L2 = -5.994810104370117

Epoch 50 in 403.99 sec
Train accuracy :	0.975	(58514/60000)		Train loss :	0.0849
Val accuracy   :	0.96	(9599/10000)		Val loss :	0.1335
