# Supplementary material
Source: ML conference proceedings conference paper supplement (https://proceedings.neurips.cc/paper_files/paper/2022/hash/545a114e655f9d25ba0d56ea9a01fc6e-Abstract.html)
Supplement: Supplementary file 1 [file 545a114e655f9d25ba0d56ea9a01fc6e-Supplemental-Conference.zip › revised_supplemental/code/results/table1/noise/classic_ep_4e-1/2022-08-01_17-36-01_xp_mlp_2h256_ep1_beta4e-1_noise4e-2_run2/log.txt]

python train.py simus/train/xp_mlp_ep1_noise_run2.json

Mean log L2 = -5.989412307739258

Epoch 1 in 795.76 sec
Train accuracy :	0.903	(54181/60000)		Train loss :	0.3381
Val accuracy   :	0.905	(9051/10000)		Val loss :	0.3318


Mean log L2 = -5.987764835357666

Epoch 2 in 489.90 sec
Train accuracy :	0.912	(54696/60000)		Train loss :	0.3073
Val accuracy   :	0.91	(9101/10000)		Val loss :	0.3041


Mean log L2 = -5.996684551239014

Epoch 3 in 493.95 sec
Train accuracy :	0.935	(56098/60000)		Train loss :	0.2175
Val accuracy   :	0.934	(9336/10000)		Val loss :	0.2234


Mean log L2 = -5.99497652053833

Epoch 4 in 490.81 sec
Train accuracy :	0.896	(53731/60000)		Train loss :	0.356
Val accuracy   :	0.895	(8948/10000)		Val loss :	0.3597


Mean log L2 = -5.996196746826172

Epoch 5 in 502.75 sec
Train accuracy :	0.946	(56743/60000)		Train loss :	0.2006
Val accuracy   :	0.944	(9441/10000)		Val loss :	0.1983


Mean log L2 = -5.995989799499512

Epoch 6 in 512.39 sec
Train accuracy :	0.954	(57223/60000)		Train loss :	0.1601
Val accuracy   :	0.951	(9505/10000)		Val loss :	0.1681


Mean log L2 = -5.99778938293457

Epoch 7 in 512.02 sec
Train accuracy :	0.951	(57079/60000)		Train loss :	0.1629
Val accuracy   :	0.946	(9464/10000)		Val loss :	0.1813


Mean log L2 = -5.994436264038086

Epoch 8 in 511.13 sec
Train accuracy :	0.957	(57392/60000)		Train loss :	0.1452
Val accuracy   :	0.955	(9548/10000)		Val loss :	0.1577


Mean log L2 = -5.9959716796875

Epoch 9 in 511.87 sec
Train accuracy :	0.953	(57168/60000)		Train loss :	0.1585
Val accuracy   :	0.947	(9470/10000)		Val loss :	0.1785


Mean log L2 = -5.995784282684326

Epoch 10 in 512.29 sec
Train accuracy :	0.959	(57538/60000)		Train loss :	0.1397
Val accuracy   :	0.954	(9538/10000)		Val loss :	0.1554


Mean log L2 = -5.996408462524414

Epoch 11 in 512.36 sec
Train accuracy :	0.967	(58006/60000)		Train loss :	0.1156
Val accuracy   :	0.961	(9609/10000)		Val loss :	0.1353


Mean log L2 = -5.995274066925049

Epoch 12 in 512.90 sec
Train accuracy :	0.964	(57847/60000)		Train loss :	0.1252
Val accuracy   :	0.959	(9587/10000)		Val loss :	0.1468


Mean log L2 = -5.994529724121094

Epoch 13 in 513.68 sec
Train accuracy :	0.955	(57329/60000)		Train loss :	0.1492
Val accuracy   :	0.955	(9545/10000)		Val loss :	0.1617


Mean log L2 = -5.99587869644165

Epoch 14 in 513.37 sec
Train accuracy :	0.956	(57366/60000)		Train loss :	0.1468
Val accuracy   :	0.951	(9506/10000)		Val loss :	0.1705


Mean log L2 = -5.998053073883057

Epoch 15 in 512.99 sec
Train accuracy :	0.959	(57545/60000)		Train loss :	0.1402
Val accuracy   :	0.953	(9531/10000)		Val loss :	0.16


Mean log L2 = -5.997015476226807

Epoch 16 in 509.90 sec
Train accuracy :	0.964	(57862/60000)		Train loss :	0.1233
Val accuracy   :	0.96	(9599/10000)		Val loss :	0.1461


Mean log L2 = -5.994769096374512

Epoch 17 in 513.31 sec
Train accuracy :	0.958	(57484/60000)		Train loss :	0.1386
Val accuracy   :	0.949	(9489/10000)		Val loss :	0.1716


Mean log L2 = -5.997042655944824

Epoch 18 in 514.33 sec
Train accuracy :	0.95	(56987/60000)		Train loss :	0.1666
Val accuracy   :	0.945	(9445/10000)		Val loss :	0.1854


Mean log L2 = -5.996345043182373

Epoch 19 in 514.24 sec
Train accuracy :	0.95	(56998/60000)		Train loss :	0.1594
Val accuracy   :	0.943	(9433/10000)		Val loss :	0.1966


Mean log L2 = -5.998615741729736

Epoch 20 in 512.64 sec
Train accuracy :	0.964	(57812/60000)		Train loss :	0.1235
Val accuracy   :	0.956	(9561/10000)		Val loss :	0.1632


Mean log L2 = -5.99873685836792

Epoch 21 in 497.91 sec
Train accuracy :	0.969	(58162/60000)		Train loss :	0.1062
Val accuracy   :	0.963	(9634/10000)		Val loss :	0.1402


Mean log L2 = -5.994521141052246

Epoch 22 in 492.19 sec
Train accuracy :	0.954	(57210/60000)		Train loss :	0.1587
Val accuracy   :	0.946	(9463/10000)		Val loss :	0.1958


Mean log L2 = -5.994739055633545

Epoch 23 in 496.34 sec
Train accuracy :	0.968	(58070/60000)		Train loss :	0.1076
Val accuracy   :	0.96	(9603/10000)		Val loss :	0.1468


Mean log L2 = -5.999185562133789

Epoch 24 in 487.26 sec
Train accuracy :	0.951	(57050/60000)		Train loss :	0.1602
Val accuracy   :	0.941	(9414/10000)		Val loss :	0.1975


Mean log L2 = -5.9974565505981445

Epoch 25 in 493.76 sec
Train accuracy :	0.959	(57514/60000)		Train loss :	0.1299
Val accuracy   :	0.95	(9502/10000)		Val loss :	0.1631


Mean log L2 = -5.9986796379089355

Epoch 26 in 489.39 sec
Train accuracy :	0.971	(58252/60000)		Train loss :	0.1024
Val accuracy   :	0.963	(9630/10000)		Val loss :	0.1319


Mean log L2 = -5.997218608856201

Epoch 27 in 495.18 sec
Train accuracy :	0.976	(58561/60000)		Train loss :	0.0825
Val accuracy   :	0.962	(9619/10000)		Val loss :	0.1309


Mean log L2 = -5.995555400848389

Epoch 28 in 489.47 sec
Train accuracy :	0.979	(58750/60000)		Train loss :	0.0694
Val accuracy   :	0.968	(9678/10000)		Val loss :	0.103


Mean log L2 = -5.998846530914307

Epoch 29 in 492.04 sec
Train accuracy :	0.97	(58216/60000)		Train loss :	0.0983
Val accuracy   :	0.961	(9606/10000)		Val loss :	0.1389


Mean log L2 = -5.998995304107666

Epoch 30 in 489.57 sec
Train accuracy :	0.975	(58506/60000)		Train loss :	0.0846
Val accuracy   :	0.966	(9664/10000)		Val loss :	0.1219


Mean log L2 = -5.995112895965576

Epoch 31 in 489.99 sec
Train accuracy :	0.965	(57900/60000)		Train loss :	0.1128
Val accuracy   :	0.954	(9538/10000)		Val loss :	0.1529


Mean log L2 = -5.9962239265441895

Epoch 32 in 490.02 sec
Train accuracy :	0.975	(58527/60000)		Train loss :	0.0862
Val accuracy   :	0.966	(9657/10000)		Val loss :	0.1192


Mean log L2 = -5.998857021331787

Epoch 33 in 494.59 sec
Train accuracy :	0.97	(58202/60000)		Train loss :	0.0997
Val accuracy   :	0.962	(9622/10000)		Val loss :	0.1372


Mean log L2 = -5.997987747192383

Epoch 34 in 492.12 sec
Train accuracy :	0.98	(58787/60000)		Train loss :	0.0681
Val accuracy   :	0.97	(9699/10000)		Val loss :	0.1064


Mean log L2 = -5.992466926574707

Epoch 35 in 495.53 sec
Train accuracy :	0.965	(57899/60000)		Train loss :	0.1162
Val accuracy   :	0.955	(9545/10000)		Val loss :	0.1577


Mean log L2 = -5.994768142700195

Epoch 36 in 490.20 sec
Train accuracy :	0.961	(57668/60000)		Train loss :	0.1311
Val accuracy   :	0.949	(9494/10000)		Val loss :	0.1898


Mean log L2 = -5.997603416442871

Epoch 37 in 491.88 sec
Train accuracy :	0.974	(58427/60000)		Train loss :	0.0915
Val accuracy   :	0.964	(9643/10000)		Val loss :	0.131


Mean log L2 = -5.997798442840576

Epoch 38 in 490.69 sec
Train accuracy :	0.962	(57713/60000)		Train loss :	0.1299
Val accuracy   :	0.951	(9507/10000)		Val loss :	0.1711


Mean log L2 = -5.997132778167725

Epoch 39 in 487.62 sec
Train accuracy :	0.976	(58572/60000)		Train loss :	0.0809
Val accuracy   :	0.969	(9692/10000)		Val loss :	0.1125


Mean log L2 = -5.997831344604492

Epoch 40 in 491.75 sec
Train accuracy :	0.975	(58475/60000)		Train loss :	0.0835
Val accuracy   :	0.962	(9623/10000)		Val loss :	0.1257


Mean log L2 = -5.999307155609131

Epoch 41 in 490.22 sec
Train accuracy :	0.971	(58274/60000)		Train loss :	0.0967
Val accuracy   :	0.958	(9578/10000)		Val loss :	0.1407


Mean log L2 = -5.99741792678833

Epoch 42 in 493.07 sec
Train accuracy :	0.977	(58634/60000)		Train loss :	0.0775
Val accuracy   :	0.966	(9655/10000)		Val loss :	0.1284


Mean log L2 = -5.99849796295166

Epoch 43 in 494.85 sec
Train accuracy :	0.964	(57810/60000)		Train loss :	0.1171
Val accuracy   :	0.955	(9550/10000)		Val loss :	0.1481


Mean log L2 = -5.999319553375244

Epoch 44 in 494.90 sec
Train accuracy :	0.971	(58266/60000)		Train loss :	0.0945
Val accuracy   :	0.96	(9599/10000)		Val loss :	0.135


Mean log L2 = -5.9957051277160645

Epoch 45 in 491.44 sec
Train accuracy :	0.978	(58682/60000)		Train loss :	0.0724
Val accuracy   :	0.966	(9662/10000)		Val loss :	0.1178


Mean log L2 = -5.995884895324707

Epoch 46 in 493.62 sec
Train accuracy :	0.977	(58639/60000)		Train loss :	0.0733
Val accuracy   :	0.966	(9662/10000)		Val loss :	0.1134


Mean log L2 = -5.9963226318359375

Epoch 47 in 492.20 sec
Train accuracy :	0.975	(58495/60000)		Train loss :	0.0833
Val accuracy   :	0.963	(9628/10000)		Val loss :	0.1276


Mean log L2 = -5.997011184692383

Epoch 48 in 496.05 sec
Train accuracy :	0.982	(58915/60000)		Train loss :	0.0627
Val accuracy   :	0.97	(9701/10000)		Val loss :	0.1071


Mean log L2 = -5.995108127593994

Epoch 49 in 495.92 sec
Train accuracy :	0.972	(58335/60000)		Train loss :	0.0908
Val accuracy   :	0.959	(9587/10000)		Val loss :	0.1391


Mean log L2 = -5.994187355041504

Epoch 50 in 484.15 sec
Train accuracy :	0.982	(58893/60000)		Train loss :	0.0636
Val accuracy   :	0.968	(9684/10000)		Val loss :	0.1036
