# Supplementary material
Source: ML conference proceedings conference paper supplement (https://proceedings.neurips.cc/paper_files/paper/2022/hash/545a114e655f9d25ba0d56ea9a01fc6e-Abstract.html)
Supplement: Supplementary file 1 [file 545a114e655f9d25ba0d56ea9a01fc6e-Supplemental-Conference.zip › revised_supplemental/code/results/table1/noise/classic_ep_4e-1/2022-08-01_17-36-01_xp_mlp_2h256_ep1_beta4e-1_noise4e-2_run3/log.txt]

python train.py simus/train/xp_mlp_ep1_noise_run3.json

Mean log L2 = -5.989733695983887

Epoch 1 in 796.75 sec
Train accuracy :	0.885	(53087/60000)		Train loss :	0.4187
Val accuracy   :	0.885	(8855/10000)		Val loss :	0.4137


Mean log L2 = -5.996720790863037

Epoch 2 in 484.66 sec
Train accuracy :	0.929	(55770/60000)		Train loss :	0.2537
Val accuracy   :	0.928	(9283/10000)		Val loss :	0.2558


Mean log L2 = -5.99038028717041

Epoch 3 in 487.22 sec
Train accuracy :	0.926	(55568/60000)		Train loss :	0.2601
Val accuracy   :	0.925	(9251/10000)		Val loss :	0.268


Mean log L2 = -5.995118141174316

Epoch 4 in 492.20 sec
Train accuracy :	0.93	(55789/60000)		Train loss :	0.2396
Val accuracy   :	0.927	(9270/10000)		Val loss :	0.2467


Mean log L2 = -5.9959330558776855

Epoch 5 in 490.51 sec
Train accuracy :	0.915	(54894/60000)		Train loss :	0.2986
Val accuracy   :	0.911	(9109/10000)		Val loss :	0.3048


Mean log L2 = -5.997979640960693

Epoch 6 in 508.66 sec
Train accuracy :	0.925	(55518/60000)		Train loss :	0.261
Val accuracy   :	0.925	(9247/10000)		Val loss :	0.2626


Mean log L2 = -5.997800827026367

Epoch 7 in 513.93 sec
Train accuracy :	0.936	(56165/60000)		Train loss :	0.2079
Val accuracy   :	0.935	(9355/10000)		Val loss :	0.2168


Mean log L2 = -5.9970526695251465

Epoch 8 in 510.05 sec
Train accuracy :	0.956	(57362/60000)		Train loss :	0.1526
Val accuracy   :	0.95	(9504/10000)		Val loss :	0.1702


Mean log L2 = -5.995606422424316

Epoch 9 in 509.92 sec
Train accuracy :	0.952	(57115/60000)		Train loss :	0.1636
Val accuracy   :	0.948	(9484/10000)		Val loss :	0.1792


Mean log L2 = -5.998766899108887

Epoch 10 in 510.35 sec
Train accuracy :	0.957	(57428/60000)		Train loss :	0.1487
Val accuracy   :	0.953	(9526/10000)		Val loss :	0.164


Mean log L2 = -5.998738765716553

Epoch 11 in 508.18 sec
Train accuracy :	0.959	(57534/60000)		Train loss :	0.1413
Val accuracy   :	0.956	(9557/10000)		Val loss :	0.1607


Mean log L2 = -5.997603893280029

Epoch 12 in 511.12 sec
Train accuracy :	0.907	(54404/60000)		Train loss :	0.3303
Val accuracy   :	0.909	(9089/10000)		Val loss :	0.3381


Mean log L2 = -5.997699737548828

Epoch 13 in 512.27 sec
Train accuracy :	0.948	(56870/60000)		Train loss :	0.1744
Val accuracy   :	0.947	(9466/10000)		Val loss :	0.1822


Mean log L2 = -5.998813629150391

Epoch 14 in 508.90 sec
Train accuracy :	0.953	(57192/60000)		Train loss :	0.1609
Val accuracy   :	0.948	(9479/10000)		Val loss :	0.1828


Mean log L2 = -5.995126724243164

Epoch 15 in 513.65 sec
Train accuracy :	0.952	(57091/60000)		Train loss :	0.1662
Val accuracy   :	0.947	(9466/10000)		Val loss :	0.1839


Mean log L2 = -5.997535228729248

Epoch 16 in 507.58 sec
Train accuracy :	0.947	(56812/60000)		Train loss :	0.1806
Val accuracy   :	0.941	(9411/10000)		Val loss :	0.2031


Mean log L2 = -5.996699810028076

Epoch 17 in 509.09 sec
Train accuracy :	0.943	(56587/60000)		Train loss :	0.1915
Val accuracy   :	0.941	(9411/10000)		Val loss :	0.207


Mean log L2 = -5.9978742599487305

Epoch 18 in 508.24 sec
Train accuracy :	0.961	(57656/60000)		Train loss :	0.136
Val accuracy   :	0.957	(9566/10000)		Val loss :	0.1533


Mean log L2 = -5.999593257904053

Epoch 19 in 517.46 sec
Train accuracy :	0.96	(57616/60000)		Train loss :	0.1369
Val accuracy   :	0.954	(9538/10000)		Val loss :	0.1576


Mean log L2 = -5.9961700439453125

Epoch 20 in 506.85 sec
Train accuracy :	0.963	(57756/60000)		Train loss :	0.1291
Val accuracy   :	0.952	(9517/10000)		Val loss :	0.1719


Mean log L2 = -5.99649715423584

Epoch 21 in 493.49 sec
Train accuracy :	0.961	(57635/60000)		Train loss :	0.1345
Val accuracy   :	0.953	(9531/10000)		Val loss :	0.1659


Mean log L2 = -5.996707439422607

Epoch 22 in 488.91 sec
Train accuracy :	0.964	(57831/60000)		Train loss :	0.1228
Val accuracy   :	0.959	(9586/10000)		Val loss :	0.1552


Mean log L2 = -5.995614528656006

Epoch 23 in 485.67 sec
Train accuracy :	0.961	(57638/60000)		Train loss :	0.1314
Val accuracy   :	0.956	(9561/10000)		Val loss :	0.15


Mean log L2 = -5.99962854385376

Epoch 24 in 485.90 sec
Train accuracy :	0.97	(58215/60000)		Train loss :	0.1012
Val accuracy   :	0.961	(9609/10000)		Val loss :	0.1348


Mean log L2 = -5.997897624969482

Epoch 25 in 484.33 sec
Train accuracy :	0.952	(57132/60000)		Train loss :	0.1606
Val accuracy   :	0.949	(9489/10000)		Val loss :	0.1779


Mean log L2 = -5.998452663421631

Epoch 26 in 487.17 sec
Train accuracy :	0.94	(56384/60000)		Train loss :	0.2057
Val accuracy   :	0.935	(9347/10000)		Val loss :	0.2428


Mean log L2 = -5.993628978729248

Epoch 27 in 486.60 sec
Train accuracy :	0.972	(58343/60000)		Train loss :	0.0925
Val accuracy   :	0.963	(9634/10000)		Val loss :	0.1241


Mean log L2 = -5.998373508453369

Epoch 28 in 486.96 sec
Train accuracy :	0.971	(58266/60000)		Train loss :	0.1035
Val accuracy   :	0.961	(9608/10000)		Val loss :	0.1296


Mean log L2 = -5.999614238739014

Epoch 29 in 490.12 sec
Train accuracy :	0.943	(56551/60000)		Train loss :	0.199
Val accuracy   :	0.938	(9383/10000)		Val loss :	0.2315


Mean log L2 = -5.997488975524902

Epoch 30 in 489.83 sec
Train accuracy :	0.968	(58105/60000)		Train loss :	0.1085
Val accuracy   :	0.96	(9604/10000)		Val loss :	0.1402


Mean log L2 = -5.995877265930176

Epoch 31 in 489.45 sec
Train accuracy :	0.973	(58368/60000)		Train loss :	0.0912
Val accuracy   :	0.964	(9643/10000)		Val loss :	0.1289


Mean log L2 = -5.997191905975342

Epoch 32 in 487.37 sec
Train accuracy :	0.975	(58511/60000)		Train loss :	0.0856
Val accuracy   :	0.964	(9644/10000)		Val loss :	0.1269


Mean log L2 = -5.996081352233887

Epoch 33 in 488.48 sec
Train accuracy :	0.965	(57898/60000)		Train loss :	0.1137
Val accuracy   :	0.958	(9581/10000)		Val loss :	0.1425


Mean log L2 = -5.998226642608643

Epoch 34 in 488.02 sec
Train accuracy :	0.972	(58309/60000)		Train loss :	0.0964
Val accuracy   :	0.963	(9625/10000)		Val loss :	0.1405


Mean log L2 = -5.998513698577881

Epoch 35 in 483.37 sec
Train accuracy :	0.96	(57598/60000)		Train loss :	0.1283
Val accuracy   :	0.949	(9493/10000)		Val loss :	0.1695


Mean log L2 = -5.998168468475342

Epoch 36 in 485.68 sec
Train accuracy :	0.978	(58656/60000)		Train loss :	0.0753
Val accuracy   :	0.969	(9686/10000)		Val loss :	0.107


Mean log L2 = -5.9987101554870605

Epoch 37 in 488.48 sec
Train accuracy :	0.969	(58167/60000)		Train loss :	0.1041
Val accuracy   :	0.962	(9617/10000)		Val loss :	0.1373


Mean log L2 = -5.997472763061523

Epoch 38 in 486.00 sec
Train accuracy :	0.958	(57505/60000)		Train loss :	0.1441
Val accuracy   :	0.949	(9493/10000)		Val loss :	0.1836


Mean log L2 = -5.981532096862793

Epoch 39 in 493.75 sec
Train accuracy :	0.966	(57965/60000)		Train loss :	0.1122
Val accuracy   :	0.953	(9534/10000)		Val loss :	0.1654


Mean log L2 = -5.997888088226318

Epoch 40 in 488.30 sec
Train accuracy :	0.975	(58527/60000)		Train loss :	0.0817
Val accuracy   :	0.967	(9669/10000)		Val loss :	0.1162


Mean log L2 = -5.999876976013184

Epoch 41 in 488.79 sec
Train accuracy :	0.946	(56782/60000)		Train loss :	0.1886
Val accuracy   :	0.936	(9364/10000)		Val loss :	0.2262


Mean log L2 = -5.998389720916748

Epoch 42 in 484.74 sec
Train accuracy :	0.972	(58347/60000)		Train loss :	0.0937
Val accuracy   :	0.96	(9599/10000)		Val loss :	0.1457


Mean log L2 = -5.998424530029297

Epoch 43 in 491.81 sec
Train accuracy :	0.963	(57763/60000)		Train loss :	0.1271
Val accuracy   :	0.949	(9490/10000)		Val loss :	0.1724


Mean log L2 = -5.998482704162598

Epoch 44 in 486.92 sec
Train accuracy :	0.972	(58290/60000)		Train loss :	0.0926
Val accuracy   :	0.959	(9585/10000)		Val loss :	0.1448


Mean log L2 = -5.99848747253418

Epoch 45 in 489.24 sec
Train accuracy :	0.956	(57363/60000)		Train loss :	0.1438
Val accuracy   :	0.945	(9452/10000)		Val loss :	0.1896


Mean log L2 = -5.996865272521973

Epoch 46 in 490.48 sec
Train accuracy :	0.965	(57902/60000)		Train loss :	0.1231
Val accuracy   :	0.955	(9547/10000)		Val loss :	0.1617


Mean log L2 = -5.998010158538818

Epoch 47 in 486.33 sec
Train accuracy :	0.969	(58131/60000)		Train loss :	0.1055
Val accuracy   :	0.959	(9589/10000)		Val loss :	0.1435


Mean log L2 = -5.998598098754883

Epoch 48 in 485.45 sec
Train accuracy :	0.973	(58357/60000)		Train loss :	0.0947
Val accuracy   :	0.964	(9637/10000)		Val loss :	0.1364


Mean log L2 = -5.998080253601074

Epoch 49 in 488.66 sec
Train accuracy :	0.977	(58644/60000)		Train loss :	0.0765
Val accuracy   :	0.965	(9648/10000)		Val loss :	0.1258


Mean log L2 = -5.999269008636475

Epoch 50 in 486.73 sec
Train accuracy :	0.977	(58596/60000)		Train loss :	0.0814
Val accuracy   :	0.964	(9641/10000)		Val loss :	0.1313
