# Supplementary material
Source: ML conference proceedings conference paper supplement (https://proceedings.neurips.cc/paper_files/paper/2022/hash/545a114e655f9d25ba0d56ea9a01fc6e-Abstract.html)
Supplement: Supplementary file 1 [file 545a114e655f9d25ba0d56ea9a01fc6e-Supplemental-Conference.zip › revised_supplemental/code/results/table1/noise/classic_ep_old/2022-05-18_15-07-47_xp_mlp_2h256_ep1_beta4e-1_noise4e-2_run1/log.txt]

python train.py simus/ep/mlp/mnist_runs/noise/classic_ep_run1.json

Mean log L2 = -5.784021854400635

Epoch 1 in 460.80 sec
Train accuracy :	0.851	(51073/60000)		Train loss :	0.5617
Val accuracy   :	0.847	(8470/10000)		Val loss :	0.5573


Mean log L2 = -5.889148235321045

Epoch 2 in 38.91 sec
Train accuracy :	0.907	(54420/60000)		Train loss :	0.3385
Val accuracy   :	0.908	(9082/10000)		Val loss :	0.3272


Mean log L2 = -5.892040252685547

Epoch 3 in 39.05 sec
Train accuracy :	0.922	(55339/60000)		Train loss :	0.2626
Val accuracy   :	0.921	(9212/10000)		Val loss :	0.2658


Mean log L2 = -5.861914157867432

Epoch 4 in 39.88 sec
Train accuracy :	0.914	(54826/60000)		Train loss :	0.2927
Val accuracy   :	0.914	(9142/10000)		Val loss :	0.2911


Mean log L2 = -5.892563819885254

Epoch 5 in 39.88 sec
Train accuracy :	0.935	(56128/60000)		Train loss :	0.2237
Val accuracy   :	0.931	(9310/10000)		Val loss :	0.241


Mean log L2 = -5.906407833099365

Epoch 6 in 39.47 sec
Train accuracy :	0.928	(55655/60000)		Train loss :	0.2473
Val accuracy   :	0.93	(9296/10000)		Val loss :	0.2517


Mean log L2 = -5.898248195648193

Epoch 7 in 41.48 sec
Train accuracy :	0.93	(55818/60000)		Train loss :	0.2282
Val accuracy   :	0.929	(9288/10000)		Val loss :	0.2375


Mean log L2 = -5.89669132232666

Epoch 8 in 41.34 sec
Train accuracy :	0.941	(56477/60000)		Train loss :	0.1998
Val accuracy   :	0.939	(9389/10000)		Val loss :	0.2061


Mean log L2 = -5.878274917602539

Epoch 9 in 41.54 sec
Train accuracy :	0.952	(57120/60000)		Train loss :	0.1695
Val accuracy   :	0.951	(9506/10000)		Val loss :	0.1803


Mean log L2 = -5.891653060913086

Epoch 10 in 39.50 sec
Train accuracy :	0.953	(57196/60000)		Train loss :	0.161
Val accuracy   :	0.948	(9480/10000)		Val loss :	0.1776


Mean log L2 = -5.872832298278809

Epoch 11 in 39.78 sec
Train accuracy :	0.951	(57085/60000)		Train loss :	0.1707
Val accuracy   :	0.947	(9468/10000)		Val loss :	0.1933


Mean log L2 = -5.852867126464844

Epoch 12 in 40.07 sec
Train accuracy :	0.954	(57266/60000)		Train loss :	0.1608
Val accuracy   :	0.948	(9480/10000)		Val loss :	0.1866


Mean log L2 = -5.898108959197998

Epoch 13 in 39.22 sec
Train accuracy :	0.953	(57176/60000)		Train loss :	0.1561
Val accuracy   :	0.947	(9469/10000)		Val loss :	0.1892


Mean log L2 = -5.86411190032959

Epoch 14 in 38.66 sec
Train accuracy :	0.951	(57057/60000)		Train loss :	0.1713
Val accuracy   :	0.944	(9440/10000)		Val loss :	0.1979


Mean log L2 = -5.872743606567383

Epoch 15 in 40.17 sec
Train accuracy :	0.966	(57935/60000)		Train loss :	0.1199
Val accuracy   :	0.959	(9590/10000)		Val loss :	0.1396


Mean log L2 = -5.8590989112854

Epoch 16 in 39.61 sec
Train accuracy :	0.945	(56715/60000)		Train loss :	0.1833
Val accuracy   :	0.94	(9395/10000)		Val loss :	0.212


Mean log L2 = -5.872344017028809

Epoch 17 in 39.33 sec
Train accuracy :	0.957	(57403/60000)		Train loss :	0.1423
Val accuracy   :	0.952	(9515/10000)		Val loss :	0.1756


Mean log L2 = -5.830867767333984

Epoch 18 in 41.42 sec
Train accuracy :	0.961	(57680/60000)		Train loss :	0.135
Val accuracy   :	0.952	(9517/10000)		Val loss :	0.1806


Mean log L2 = -5.892490863800049

Epoch 19 in 41.18 sec
Train accuracy :	0.959	(57557/60000)		Train loss :	0.1313
Val accuracy   :	0.95	(9499/10000)		Val loss :	0.1593


Mean log L2 = -5.8610453605651855

Epoch 20 in 42.89 sec
Train accuracy :	0.964	(57853/60000)		Train loss :	0.1177
Val accuracy   :	0.954	(9537/10000)		Val loss :	0.1555


Mean log L2 = -5.879772186279297

Epoch 21 in 40.19 sec
Train accuracy :	0.961	(57680/60000)		Train loss :	0.1317
Val accuracy   :	0.954	(9542/10000)		Val loss :	0.1601


Mean log L2 = -5.862854957580566

Epoch 22 in 40.33 sec
Train accuracy :	0.96	(57606/60000)		Train loss :	0.1364
Val accuracy   :	0.952	(9517/10000)		Val loss :	0.1727


Mean log L2 = -5.855953693389893

Epoch 23 in 40.45 sec
Train accuracy :	0.971	(58243/60000)		Train loss :	0.1035
Val accuracy   :	0.963	(9627/10000)		Val loss :	0.1353


Mean log L2 = -5.885752201080322

Epoch 24 in 40.14 sec
Train accuracy :	0.965	(57916/60000)		Train loss :	0.1162
Val accuracy   :	0.959	(9586/10000)		Val loss :	0.1497


Mean log L2 = -5.851926326751709

Epoch 25 in 39.66 sec
Train accuracy :	0.97	(58195/60000)		Train loss :	0.1006
Val accuracy   :	0.963	(9634/10000)		Val loss :	0.1239


Mean log L2 = -5.842779636383057

Epoch 26 in 39.60 sec
Train accuracy :	0.971	(58230/60000)		Train loss :	0.1011
Val accuracy   :	0.958	(9580/10000)		Val loss :	0.1389


Mean log L2 = -5.743255615234375

Epoch 27 in 41.77 sec
Train accuracy :	0.965	(57898/60000)		Train loss :	0.1165
Val accuracy   :	0.955	(9551/10000)		Val loss :	0.1628


Mean log L2 = -5.838221073150635

Epoch 28 in 41.36 sec
Train accuracy :	0.967	(58000/60000)		Train loss :	0.1118
Val accuracy   :	0.956	(9561/10000)		Val loss :	0.1588


Mean log L2 = -5.829344272613525

Epoch 29 in 41.50 sec
Train accuracy :	0.973	(58376/60000)		Train loss :	0.0855
Val accuracy   :	0.962	(9624/10000)		Val loss :	0.1196


Mean log L2 = -5.8593974113464355

Epoch 30 in 39.35 sec
Train accuracy :	0.97	(58192/60000)		Train loss :	0.1009
Val accuracy   :	0.959	(9593/10000)		Val loss :	0.1438


Mean log L2 = -5.813729286193848

Epoch 31 in 39.57 sec
Train accuracy :	0.963	(57770/60000)		Train loss :	0.121
Val accuracy   :	0.954	(9540/10000)		Val loss :	0.1555


Mean log L2 = -5.856006622314453

Epoch 32 in 39.26 sec
Train accuracy :	0.965	(57873/60000)		Train loss :	0.1201
Val accuracy   :	0.955	(9545/10000)		Val loss :	0.1575


Mean log L2 = -5.757452011108398

Epoch 33 in 39.97 sec
Train accuracy :	0.972	(58291/60000)		Train loss :	0.1008
Val accuracy   :	0.962	(9618/10000)		Val loss :	0.1373


Mean log L2 = -5.872166156768799

Epoch 34 in 41.44 sec
Train accuracy :	0.973	(58387/60000)		Train loss :	0.0872
Val accuracy   :	0.963	(9634/10000)		Val loss :	0.13


Mean log L2 = -5.850593090057373

Epoch 35 in 39.93 sec
Train accuracy :	0.966	(57950/60000)		Train loss :	0.1142
Val accuracy   :	0.958	(9579/10000)		Val loss :	0.1565


Mean log L2 = -5.840066432952881

Epoch 36 in 40.55 sec
Train accuracy :	0.975	(58499/60000)		Train loss :	0.0805
Val accuracy   :	0.962	(9622/10000)		Val loss :	0.124


Mean log L2 = -5.833454608917236

Epoch 37 in 39.64 sec
Train accuracy :	0.976	(58547/60000)		Train loss :	0.0821
Val accuracy   :	0.964	(9643/10000)		Val loss :	0.1307


Mean log L2 = -5.815371990203857

Epoch 38 in 38.52 sec
Train accuracy :	0.972	(58322/60000)		Train loss :	0.0952
Val accuracy   :	0.959	(9586/10000)		Val loss :	0.1452


Mean log L2 = -5.846433162689209

Epoch 39 in 40.07 sec
Train accuracy :	0.976	(58533/60000)		Train loss :	0.0864
Val accuracy   :	0.96	(9600/10000)		Val loss :	0.1525


Mean log L2 = -5.82870626449585

Epoch 40 in 39.60 sec
Train accuracy :	0.975	(58480/60000)		Train loss :	0.0827
Val accuracy   :	0.963	(9626/10000)		Val loss :	0.1256


Mean log L2 = -5.8594279289245605

Epoch 41 in 40.18 sec
Train accuracy :	0.978	(58667/60000)		Train loss :	0.0762
Val accuracy   :	0.964	(9641/10000)		Val loss :	0.123


Mean log L2 = -5.865261554718018

Epoch 42 in 41.53 sec
Train accuracy :	0.97	(58196/60000)		Train loss :	0.0999
Val accuracy   :	0.958	(9579/10000)		Val loss :	0.1496


Mean log L2 = -5.8516435623168945

Epoch 43 in 39.74 sec
Train accuracy :	0.977	(58623/60000)		Train loss :	0.0748
Val accuracy   :	0.964	(9642/10000)		Val loss :	0.1262


Mean log L2 = -5.811173439025879

Epoch 44 in 39.59 sec
Train accuracy :	0.979	(58768/60000)		Train loss :	0.0694
Val accuracy   :	0.967	(9666/10000)		Val loss :	0.1184


Mean log L2 = -5.831676006317139

Epoch 45 in 39.85 sec
Train accuracy :	0.975	(58513/60000)		Train loss :	0.0806
Val accuracy   :	0.964	(9635/10000)		Val loss :	0.1218


Mean log L2 = -5.846529960632324

Epoch 46 in 39.62 sec
Train accuracy :	0.967	(58034/60000)		Train loss :	0.1004
Val accuracy   :	0.958	(9576/10000)		Val loss :	0.1381


Mean log L2 = -5.851846218109131

Epoch 47 in 38.91 sec
Train accuracy :	0.978	(58709/60000)		Train loss :	0.0733
Val accuracy   :	0.964	(9643/10000)		Val loss :	0.1314


Mean log L2 = -5.850025653839111

Epoch 48 in 38.93 sec
Train accuracy :	0.972	(58307/60000)		Train loss :	0.0909
Val accuracy   :	0.959	(9589/10000)		Val loss :	0.138


Mean log L2 = -5.841195583343506

Epoch 49 in 39.61 sec
Train accuracy :	0.982	(58934/60000)		Train loss :	0.0587
Val accuracy   :	0.968	(9682/10000)		Val loss :	0.1131


Mean log L2 = -5.855678558349609

Epoch 50 in 40.98 sec
Train accuracy :	0.977	(58629/60000)		Train loss :	0.0741
Val accuracy   :	0.965	(9653/10000)		Val loss :	0.123
