# Supplementary material
Source: ML conference proceedings conference paper supplement (https://proceedings.neurips.cc/paper_files/paper/2022/hash/545a114e655f9d25ba0d56ea9a01fc6e-Abstract.html)
Supplement: Supplementary file 1 [file 545a114e655f9d25ba0d56ea9a01fc6e-Supplemental-Conference.zip › revised_supplemental/code/results/table1/noise/classic_ep_old/2022-05-18_15-14-01_xp_mlp_2h256_ep1_beta4e-1_noise4e-2_run3/log.txt]

python train.py simus/ep/mlp/mnist_runs/noise/classic_ep_run3.json

Mean log L2 = -5.920896053314209

Epoch 1 in 478.17 sec
Train accuracy :	0.763	(45783/60000)		Train loss :	0.78
Val accuracy   :	0.776	(7757/10000)		Val loss :	0.7607


Mean log L2 = -5.915935039520264

Epoch 2 in 41.86 sec
Train accuracy :	0.895	(53680/60000)		Train loss :	0.3614
Val accuracy   :	0.896	(8963/10000)		Val loss :	0.3575


Mean log L2 = -5.8903326988220215

Epoch 3 in 41.53 sec
Train accuracy :	0.916	(54973/60000)		Train loss :	0.2789
Val accuracy   :	0.918	(9180/10000)		Val loss :	0.2774


Mean log L2 = -5.87373161315918

Epoch 4 in 46.44 sec
Train accuracy :	0.922	(55342/60000)		Train loss :	0.2658
Val accuracy   :	0.918	(9181/10000)		Val loss :	0.2794


Mean log L2 = -5.898924827575684

Epoch 5 in 45.34 sec
Train accuracy :	0.898	(53886/60000)		Train loss :	0.3274
Val accuracy   :	0.896	(8958/10000)		Val loss :	0.3299


Mean log L2 = -5.878331661224365

Epoch 6 in 39.27 sec
Train accuracy :	0.928	(55674/60000)		Train loss :	0.2483
Val accuracy   :	0.924	(9239/10000)		Val loss :	0.2612


Mean log L2 = -5.908640384674072

Epoch 7 in 47.20 sec
Train accuracy :	0.947	(56825/60000)		Train loss :	0.1881
Val accuracy   :	0.942	(9415/10000)		Val loss :	0.2028


Mean log L2 = -5.8954691886901855

Epoch 8 in 45.13 sec
Train accuracy :	0.94	(56413/60000)		Train loss :	0.209
Val accuracy   :	0.938	(9379/10000)		Val loss :	0.222


Mean log L2 = -5.9223504066467285

Epoch 9 in 41.92 sec
Train accuracy :	0.946	(56778/60000)		Train loss :	0.1871
Val accuracy   :	0.943	(9431/10000)		Val loss :	0.1982


Mean log L2 = -5.872600555419922

Epoch 10 in 43.21 sec
Train accuracy :	0.954	(57259/60000)		Train loss :	0.1581
Val accuracy   :	0.95	(9503/10000)		Val loss :	0.1795


Mean log L2 = -5.857450008392334

Epoch 11 in 42.67 sec
Train accuracy :	0.959	(57552/60000)		Train loss :	0.1403
Val accuracy   :	0.956	(9560/10000)		Val loss :	0.1565


Mean log L2 = -5.87996244430542

Epoch 12 in 43.33 sec
Train accuracy :	0.957	(57426/60000)		Train loss :	0.1436
Val accuracy   :	0.952	(9518/10000)		Val loss :	0.1655


Mean log L2 = -5.880063533782959

Epoch 13 in 40.41 sec
Train accuracy :	0.958	(57489/60000)		Train loss :	0.1437
Val accuracy   :	0.951	(9507/10000)		Val loss :	0.1737


Mean log L2 = -5.866721153259277

Epoch 14 in 40.21 sec
Train accuracy :	0.959	(57524/60000)		Train loss :	0.1394
Val accuracy   :	0.952	(9518/10000)		Val loss :	0.1667


Mean log L2 = -5.870250225067139

Epoch 15 in 41.98 sec
Train accuracy :	0.955	(57286/60000)		Train loss :	0.151
Val accuracy   :	0.95	(9499/10000)		Val loss :	0.1751


Mean log L2 = -5.855947017669678

Epoch 16 in 41.73 sec
Train accuracy :	0.956	(57381/60000)		Train loss :	0.1413
Val accuracy   :	0.949	(9494/10000)		Val loss :	0.1661


Mean log L2 = -5.710972309112549

Epoch 17 in 43.80 sec
Train accuracy :	0.961	(57631/60000)		Train loss :	0.1339
Val accuracy   :	0.954	(9541/10000)		Val loss :	0.1628


Mean log L2 = -5.863943576812744

Epoch 18 in 44.74 sec
Train accuracy :	0.963	(57766/60000)		Train loss :	0.1289
Val accuracy   :	0.954	(9544/10000)		Val loss :	0.1531


Mean log L2 = -5.872854709625244

Epoch 19 in 37.95 sec
Train accuracy :	0.964	(57862/60000)		Train loss :	0.1214
Val accuracy   :	0.955	(9549/10000)		Val loss :	0.1513


Mean log L2 = -5.868293762207031

Epoch 20 in 40.80 sec
Train accuracy :	0.968	(58067/60000)		Train loss :	0.1131
Val accuracy   :	0.96	(9597/10000)		Val loss :	0.1458


Mean log L2 = -5.864984512329102

Epoch 21 in 45.28 sec
Train accuracy :	0.966	(57933/60000)		Train loss :	0.1176
Val accuracy   :	0.954	(9542/10000)		Val loss :	0.1528


Mean log L2 = -5.88036584854126

Epoch 22 in 44.60 sec
Train accuracy :	0.959	(57539/60000)		Train loss :	0.1343
Val accuracy   :	0.95	(9496/10000)		Val loss :	0.1722


Mean log L2 = -5.8581156730651855

Epoch 23 in 41.09 sec
Train accuracy :	0.966	(57967/60000)		Train loss :	0.1147
Val accuracy   :	0.956	(9560/10000)		Val loss :	0.1534


Mean log L2 = -5.869426727294922

Epoch 24 in 42.62 sec
Train accuracy :	0.964	(57859/60000)		Train loss :	0.1159
Val accuracy   :	0.954	(9540/10000)		Val loss :	0.16


Mean log L2 = -5.865676403045654

Epoch 25 in 42.32 sec
Train accuracy :	0.967	(57997/60000)		Train loss :	0.1124
Val accuracy   :	0.957	(9573/10000)		Val loss :	0.1542


Mean log L2 = -5.867763996124268

Epoch 26 in 43.21 sec
Train accuracy :	0.964	(57810/60000)		Train loss :	0.1335
Val accuracy   :	0.955	(9548/10000)		Val loss :	0.1782


Mean log L2 = -5.851286888122559

Epoch 27 in 44.63 sec
Train accuracy :	0.961	(57660/60000)		Train loss :	0.124
Val accuracy   :	0.95	(9499/10000)		Val loss :	0.1712


Mean log L2 = -5.875734329223633

Epoch 28 in 47.32 sec
Train accuracy :	0.972	(58295/60000)		Train loss :	0.0956
Val accuracy   :	0.962	(9623/10000)		Val loss :	0.143


Mean log L2 = -5.8498454093933105

Epoch 29 in 38.65 sec
Train accuracy :	0.973	(58354/60000)		Train loss :	0.095
Val accuracy   :	0.963	(9626/10000)		Val loss :	0.1341


Mean log L2 = -5.866565227508545

Epoch 30 in 38.02 sec
Train accuracy :	0.971	(58284/60000)		Train loss :	0.0941
Val accuracy   :	0.962	(9620/10000)		Val loss :	0.1337


Mean log L2 = -5.84022855758667

Epoch 31 in 44.44 sec
Train accuracy :	0.975	(58511/60000)		Train loss :	0.0864
Val accuracy   :	0.962	(9621/10000)		Val loss :	0.1354


Mean log L2 = -5.853113174438477

Epoch 32 in 51.91 sec
Train accuracy :	0.973	(58392/60000)		Train loss :	0.0906
Val accuracy   :	0.961	(9612/10000)		Val loss :	0.1447


Mean log L2 = -5.841252326965332

Epoch 33 in 41.47 sec
Train accuracy :	0.974	(58410/60000)		Train loss :	0.0884
Val accuracy   :	0.96	(9603/10000)		Val loss :	0.1412


Mean log L2 = -5.836263179779053

Epoch 34 in 43.04 sec
Train accuracy :	0.976	(58542/60000)		Train loss :	0.082
Val accuracy   :	0.965	(9651/10000)		Val loss :	0.1227


Mean log L2 = -5.878631114959717

Epoch 35 in 41.95 sec
Train accuracy :	0.972	(58290/60000)		Train loss :	0.0907
Val accuracy   :	0.962	(9622/10000)		Val loss :	0.139


Mean log L2 = -5.861073970794678

Epoch 36 in 43.37 sec
Train accuracy :	0.975	(58522/60000)		Train loss :	0.0839
Val accuracy   :	0.964	(9635/10000)		Val loss :	0.1269


Mean log L2 = -5.833617687225342

Epoch 37 in 38.99 sec
Train accuracy :	0.975	(58523/60000)		Train loss :	0.0831
Val accuracy   :	0.966	(9657/10000)		Val loss :	0.1182


Mean log L2 = -5.867450714111328

Epoch 38 in 42.01 sec
Train accuracy :	0.976	(58559/60000)		Train loss :	0.0817
Val accuracy   :	0.965	(9647/10000)		Val loss :	0.1284


Mean log L2 = -5.8455491065979

Epoch 39 in 42.69 sec
Train accuracy :	0.971	(58231/60000)		Train loss :	0.0976
Val accuracy   :	0.963	(9626/10000)		Val loss :	0.1449


Mean log L2 = -5.836673259735107

Epoch 40 in 37.86 sec
Train accuracy :	0.974	(58437/60000)		Train loss :	0.084
Val accuracy   :	0.962	(9622/10000)		Val loss :	0.1252


Mean log L2 = -5.812458515167236

Epoch 41 in 43.65 sec
Train accuracy :	0.976	(58546/60000)		Train loss :	0.0807
Val accuracy   :	0.961	(9608/10000)		Val loss :	0.1299


Mean log L2 = -5.800891399383545

Epoch 42 in 43.38 sec
Train accuracy :	0.975	(58502/60000)		Train loss :	0.0815
Val accuracy   :	0.963	(9625/10000)		Val loss :	0.1283


Mean log L2 = -5.850816249847412

Epoch 43 in 42.30 sec
Train accuracy :	0.981	(58850/60000)		Train loss :	0.0657
Val accuracy   :	0.97	(9697/10000)		Val loss :	0.11


Mean log L2 = -5.8483757972717285

Epoch 44 in 43.41 sec
Train accuracy :	0.973	(58369/60000)		Train loss :	0.0943
Val accuracy   :	0.96	(9600/10000)		Val loss :	0.1463


Mean log L2 = -5.826961994171143

Epoch 45 in 41.70 sec
Train accuracy :	0.974	(58466/60000)		Train loss :	0.082
Val accuracy   :	0.962	(9618/10000)		Val loss :	0.1409


Mean log L2 = -5.833258628845215

Epoch 46 in 43.93 sec
Train accuracy :	0.979	(58712/60000)		Train loss :	0.0713
Val accuracy   :	0.965	(9647/10000)		Val loss :	0.1166


Mean log L2 = -5.842566967010498

Epoch 47 in 42.17 sec
Train accuracy :	0.98	(58829/60000)		Train loss :	0.0662
Val accuracy   :	0.969	(9689/10000)		Val loss :	0.1209


Mean log L2 = -5.827613830566406

Epoch 48 in 43.17 sec
Train accuracy :	0.974	(58431/60000)		Train loss :	0.0846
Val accuracy   :	0.962	(9620/10000)		Val loss :	0.1347


Mean log L2 = -5.829537868499756

Epoch 49 in 42.01 sec
Train accuracy :	0.977	(58613/60000)		Train loss :	0.0756
Val accuracy   :	0.963	(9626/10000)		Val loss :	0.1309


Mean log L2 = -5.822692394256592

Epoch 50 in 41.27 sec
Train accuracy :	0.978	(58681/60000)		Train loss :	0.0717
Val accuracy   :	0.965	(9645/10000)		Val loss :	0.1241
