# Supplementary material
Source: ML conference proceedings conference paper supplement (https://proceedings.neurips.cc/paper_files/paper/2022/hash/545a114e655f9d25ba0d56ea9a01fc6e-Abstract.html)
Supplement: Supplementary file 1 [file 545a114e655f9d25ba0d56ea9a01fc6e-Supplemental-Conference.zip › revised_supplemental/code/results/table1/noise/classic_ep_old/2022-05-18_15-20-35_xp_mlp_2h256_ep1_beta4e-1_noise4e-2_run2/log.txt]

python train.py simus/ep/mlp/mnist_runs/noise/classic_ep_run2.json

Mean log L2 = -5.956937313079834

Epoch 1 in 138.37 sec
Train accuracy :	0.789	(47328/60000)		Train loss :	0.6741
Val accuracy   :	0.794	(7939/10000)		Val loss :	0.6665


Mean log L2 = -5.9593281745910645

Epoch 2 in 88.29 sec
Train accuracy :	0.9	(53987/60000)		Train loss :	0.3388
Val accuracy   :	0.904	(9039/10000)		Val loss :	0.3323


Mean log L2 = -5.96407413482666

Epoch 3 in 88.12 sec
Train accuracy :	0.909	(54526/60000)		Train loss :	0.3094
Val accuracy   :	0.909	(9090/10000)		Val loss :	0.3066


Mean log L2 = -5.964651584625244

Epoch 4 in 87.63 sec
Train accuracy :	0.928	(55657/60000)		Train loss :	0.2576
Val accuracy   :	0.926	(9262/10000)		Val loss :	0.2657


Mean log L2 = -5.969943523406982

Epoch 5 in 87.17 sec
Train accuracy :	0.929	(55713/60000)		Train loss :	0.2436
Val accuracy   :	0.928	(9276/10000)		Val loss :	0.2512


Mean log L2 = -5.966561794281006

Epoch 6 in 87.38 sec
Train accuracy :	0.936	(56136/60000)		Train loss :	0.2233
Val accuracy   :	0.932	(9317/10000)		Val loss :	0.2386


Mean log L2 = -5.966257095336914

Epoch 7 in 87.45 sec
Train accuracy :	0.923	(55400/60000)		Train loss :	0.2494
Val accuracy   :	0.923	(9226/10000)		Val loss :	0.2592


Mean log L2 = -5.97638463973999

Epoch 8 in 88.15 sec
Train accuracy :	0.947	(56802/60000)		Train loss :	0.1802
Val accuracy   :	0.943	(9427/10000)		Val loss :	0.1911


Mean log L2 = -5.9772419929504395

Epoch 9 in 87.91 sec
Train accuracy :	0.954	(57242/60000)		Train loss :	0.1567
Val accuracy   :	0.95	(9498/10000)		Val loss :	0.1758


Mean log L2 = -5.978944301605225

Epoch 10 in 88.98 sec
Train accuracy :	0.956	(57373/60000)		Train loss :	0.1509
Val accuracy   :	0.948	(9480/10000)		Val loss :	0.1764


Mean log L2 = -5.97442102432251

Epoch 11 in 89.02 sec
Train accuracy :	0.96	(57613/60000)		Train loss :	0.1396
Val accuracy   :	0.953	(9528/10000)		Val loss :	0.1641


Mean log L2 = -5.974457740783691

Epoch 12 in 90.13 sec
Train accuracy :	0.955	(57282/60000)		Train loss :	0.1531
Val accuracy   :	0.952	(9520/10000)		Val loss :	0.1656


Mean log L2 = -5.9715471267700195

Epoch 13 in 89.93 sec
Train accuracy :	0.961	(57668/60000)		Train loss :	0.1312
Val accuracy   :	0.954	(9538/10000)		Val loss :	0.154


Mean log L2 = -5.977694034576416

Epoch 14 in 88.70 sec
Train accuracy :	0.953	(57170/60000)		Train loss :	0.1559
Val accuracy   :	0.947	(9474/10000)		Val loss :	0.1769


Mean log L2 = -5.968825817108154

Epoch 15 in 91.47 sec
Train accuracy :	0.949	(56935/60000)		Train loss :	0.1674
Val accuracy   :	0.944	(9435/10000)		Val loss :	0.1936


Mean log L2 = -5.969974040985107

Epoch 16 in 92.81 sec
Train accuracy :	0.966	(57958/60000)		Train loss :	0.118
Val accuracy   :	0.96	(9604/10000)		Val loss :	0.1387


Mean log L2 = -5.973860740661621

Epoch 17 in 91.08 sec
Train accuracy :	0.961	(57688/60000)		Train loss :	0.1295
Val accuracy   :	0.954	(9542/10000)		Val loss :	0.1571


Mean log L2 = -5.9714884757995605

Epoch 18 in 90.91 sec
Train accuracy :	0.957	(57438/60000)		Train loss :	0.1475
Val accuracy   :	0.95	(9495/10000)		Val loss :	0.1864


Mean log L2 = -5.976085186004639

Epoch 19 in 87.14 sec
Train accuracy :	0.966	(57937/60000)		Train loss :	0.1174
Val accuracy   :	0.955	(9554/10000)		Val loss :	0.1468


Mean log L2 = -5.979032039642334

Epoch 20 in 87.26 sec
Train accuracy :	0.97	(58206/60000)		Train loss :	0.0995
Val accuracy   :	0.962	(9622/10000)		Val loss :	0.1288


Mean log L2 = -5.978883743286133

Epoch 21 in 87.46 sec
Train accuracy :	0.956	(57374/60000)		Train loss :	0.1485
Val accuracy   :	0.947	(9466/10000)		Val loss :	0.1971


Mean log L2 = -5.98061466217041

Epoch 22 in 88.63 sec
Train accuracy :	0.964	(57852/60000)		Train loss :	0.12
Val accuracy   :	0.957	(9569/10000)		Val loss :	0.1513


Mean log L2 = -5.969435214996338

Epoch 23 in 88.94 sec
Train accuracy :	0.958	(57490/60000)		Train loss :	0.1378
Val accuracy   :	0.946	(9458/10000)		Val loss :	0.19


Mean log L2 = -5.978063106536865

Epoch 24 in 88.10 sec
Train accuracy :	0.971	(58245/60000)		Train loss :	0.0973
Val accuracy   :	0.96	(9603/10000)		Val loss :	0.1455


Mean log L2 = -5.972332954406738

Epoch 25 in 88.13 sec
Train accuracy :	0.97	(58229/60000)		Train loss :	0.0982
Val accuracy   :	0.961	(9611/10000)		Val loss :	0.1325


Mean log L2 = -5.967496395111084

Epoch 26 in 87.22 sec
Train accuracy :	0.966	(57961/60000)		Train loss :	0.1159
Val accuracy   :	0.958	(9584/10000)		Val loss :	0.1492


Mean log L2 = -5.9680304527282715

Epoch 27 in 87.37 sec
Train accuracy :	0.968	(58081/60000)		Train loss :	0.1057
Val accuracy   :	0.957	(9568/10000)		Val loss :	0.1481


Mean log L2 = -5.968974590301514

Epoch 28 in 86.98 sec
Train accuracy :	0.973	(58362/60000)		Train loss :	0.0905
Val accuracy   :	0.961	(9611/10000)		Val loss :	0.128


Mean log L2 = -5.973504066467285

Epoch 29 in 87.53 sec
Train accuracy :	0.972	(58301/60000)		Train loss :	0.0925
Val accuracy   :	0.959	(9594/10000)		Val loss :	0.1357


Mean log L2 = -5.971053123474121

Epoch 30 in 87.58 sec
Train accuracy :	0.969	(58148/60000)		Train loss :	0.1038
Val accuracy   :	0.961	(9609/10000)		Val loss :	0.1355


Mean log L2 = -5.975276470184326

Epoch 31 in 88.58 sec
Train accuracy :	0.977	(58642/60000)		Train loss :	0.0739
Val accuracy   :	0.966	(9657/10000)		Val loss :	0.1175


Mean log L2 = -5.963972091674805

Epoch 32 in 88.00 sec
Train accuracy :	0.964	(57810/60000)		Train loss :	0.1225
Val accuracy   :	0.954	(9544/10000)		Val loss :	0.1663


Mean log L2 = -5.963265895843506

Epoch 33 in 88.18 sec
Train accuracy :	0.972	(58320/60000)		Train loss :	0.0933
Val accuracy   :	0.96	(9600/10000)		Val loss :	0.1329


Mean log L2 = -5.965148448944092

Epoch 34 in 86.90 sec
Train accuracy :	0.967	(58020/60000)		Train loss :	0.1085
Val accuracy   :	0.959	(9585/10000)		Val loss :	0.1536


Mean log L2 = -5.969905853271484

Epoch 35 in 85.81 sec
Train accuracy :	0.965	(57877/60000)		Train loss :	0.1149
Val accuracy   :	0.955	(9554/10000)		Val loss :	0.152


Mean log L2 = -5.97178316116333

Epoch 36 in 85.75 sec
Train accuracy :	0.976	(58549/60000)		Train loss :	0.0812
Val accuracy   :	0.963	(9630/10000)		Val loss :	0.1185


Mean log L2 = -5.9767889976501465

Epoch 37 in 85.81 sec
Train accuracy :	0.977	(58640/60000)		Train loss :	0.0771
Val accuracy   :	0.966	(9659/10000)		Val loss :	0.124


Mean log L2 = -5.970443248748779

Epoch 38 in 82.29 sec
Train accuracy :	0.976	(58567/60000)		Train loss :	0.079
Val accuracy   :	0.964	(9637/10000)		Val loss :	0.1216


Mean log L2 = -5.971567630767822

Epoch 39 in 85.39 sec
Train accuracy :	0.976	(58561/60000)		Train loss :	0.0806
Val accuracy   :	0.967	(9666/10000)		Val loss :	0.1172


Mean log L2 = -5.965651988983154

Epoch 40 in 86.34 sec
Train accuracy :	0.974	(58418/60000)		Train loss :	0.0904
Val accuracy   :	0.962	(9624/10000)		Val loss :	0.1279


Mean log L2 = -5.970239639282227

Epoch 41 in 85.83 sec
Train accuracy :	0.978	(58669/60000)		Train loss :	0.0753
Val accuracy   :	0.964	(9638/10000)		Val loss :	0.1333


Mean log L2 = -5.974555015563965

Epoch 42 in 86.94 sec
Train accuracy :	0.978	(58664/60000)		Train loss :	0.0734
Val accuracy   :	0.965	(9646/10000)		Val loss :	0.1192


Mean log L2 = -5.974145412445068

Epoch 43 in 85.73 sec
Train accuracy :	0.975	(58518/60000)		Train loss :	0.0783
Val accuracy   :	0.962	(9616/10000)		Val loss :	0.1249


Mean log L2 = -5.97595739364624

Epoch 44 in 86.73 sec
Train accuracy :	0.976	(58547/60000)		Train loss :	0.0799
Val accuracy   :	0.961	(9605/10000)		Val loss :	0.1449


Mean log L2 = -5.974971294403076

Epoch 45 in 87.75 sec
Train accuracy :	0.978	(58665/60000)		Train loss :	0.0746
Val accuracy   :	0.964	(9639/10000)		Val loss :	0.1243


Mean log L2 = -5.966748237609863

Epoch 46 in 86.75 sec
Train accuracy :	0.975	(58507/60000)		Train loss :	0.0842
Val accuracy   :	0.961	(9612/10000)		Val loss :	0.1288


Mean log L2 = -5.976113319396973

Epoch 47 in 85.60 sec
Train accuracy :	0.981	(58880/60000)		Train loss :	0.0613
Val accuracy   :	0.969	(9685/10000)		Val loss :	0.1089


Mean log L2 = -5.968900203704834

Epoch 48 in 85.44 sec
Train accuracy :	0.978	(58655/60000)		Train loss :	0.0717
Val accuracy   :	0.965	(9654/10000)		Val loss :	0.1207


Mean log L2 = -5.969536304473877

Epoch 49 in 85.13 sec
Train accuracy :	0.977	(58632/60000)		Train loss :	0.0758
Val accuracy   :	0.964	(9644/10000)		Val loss :	0.1236


Mean log L2 = -5.973185062408447

Epoch 50 in 86.11 sec
Train accuracy :	0.981	(58834/60000)		Train loss :	0.064
Val accuracy   :	0.969	(9693/10000)		Val loss :	0.1057
