# Supplementary material
Source: ML conference proceedings conference paper supplement (https://proceedings.neurips.cc/paper_files/paper/2022/hash/545a114e655f9d25ba0d56ea9a01fc6e-Abstract.html)
Supplement: Supplementary file 1 [file 545a114e655f9d25ba0d56ea9a01fc6e-Supplemental-Conference.zip › revised_supplemental/code/results/table1/noise/continuous_hep/2022-05-18_18-41-05_xp_mlp_2h256_oscEP_N10_beta4e-1_noise4e-2_run1/log.txt]

python train.py simus/ep/mlp/mnist_runs/noise/continuous_hep_run1.json

Mean log L2 = -0.2990698516368866

Epoch 1 in 2358.74 sec
Train accuracy :	0.945	(56671/60000)		Train loss :	0.1923
Val accuracy   :	0.941	(9407/10000)		Val loss :	0.2047


Mean log L2 = -0.36163195967674255

Epoch 2 in 578.62 sec
Train accuracy :	0.965	(57912/60000)		Train loss :	0.1274
Val accuracy   :	0.959	(9586/10000)		Val loss :	0.1541


Mean log L2 = -0.3812882602214813

Epoch 3 in 581.33 sec
Train accuracy :	0.973	(58354/60000)		Train loss :	0.1011
Val accuracy   :	0.964	(9639/10000)		Val loss :	0.1309


Mean log L2 = -0.3135744631290436

Epoch 4 in 581.13 sec
Train accuracy :	0.973	(58380/60000)		Train loss :	0.0971
Val accuracy   :	0.965	(9651/10000)		Val loss :	0.1281


Mean log L2 = -0.39037221670150757

Epoch 5 in 581.23 sec
Train accuracy :	0.984	(59024/60000)		Train loss :	0.0629
Val accuracy   :	0.972	(9717/10000)		Val loss :	0.1006


Mean log L2 = -0.4162564277648926

Epoch 6 in 580.72 sec
Train accuracy :	0.983	(58993/60000)		Train loss :	0.0626
Val accuracy   :	0.972	(9720/10000)		Val loss :	0.0989


Mean log L2 = -0.3601286709308624

Epoch 7 in 582.25 sec
Train accuracy :	0.984	(59047/60000)		Train loss :	0.0585
Val accuracy   :	0.973	(9730/10000)		Val loss :	0.0969


Mean log L2 = -0.3814414441585541

Epoch 8 in 582.46 sec
Train accuracy :	0.989	(59351/60000)		Train loss :	0.0437
Val accuracy   :	0.974	(9744/10000)		Val loss :	0.0972


Mean log L2 = -0.4285219609737396

Epoch 9 in 582.39 sec
Train accuracy :	0.991	(59444/60000)		Train loss :	0.038
Val accuracy   :	0.976	(9763/10000)		Val loss :	0.0907


Mean log L2 = -0.266198068857193

Epoch 10 in 581.77 sec
Train accuracy :	0.983	(58950/60000)		Train loss :	0.066
Val accuracy   :	0.967	(9668/10000)		Val loss :	0.1289


Mean log L2 = -0.32452842593193054

Epoch 11 in 581.62 sec
Train accuracy :	0.99	(59393/60000)		Train loss :	0.0387
Val accuracy   :	0.974	(9741/10000)		Val loss :	0.0986


Mean log L2 = -0.3330305218696594

Epoch 12 in 579.15 sec
Train accuracy :	0.992	(59518/60000)		Train loss :	0.0338
Val accuracy   :	0.975	(9752/10000)		Val loss :	0.0995


Mean log L2 = -0.4051954448223114

Epoch 13 in 582.29 sec
Train accuracy :	0.995	(59706/60000)		Train loss :	0.0215
Val accuracy   :	0.978	(9782/10000)		Val loss :	0.0878


Mean log L2 = -0.419124037027359

Epoch 14 in 581.10 sec
Train accuracy :	0.991	(59436/60000)		Train loss :	0.0342
Val accuracy   :	0.976	(9759/10000)		Val loss :	0.0938


Mean log L2 = -0.39118751883506775

Epoch 15 in 582.41 sec
Train accuracy :	0.995	(59698/60000)		Train loss :	0.0226
Val accuracy   :	0.977	(9765/10000)		Val loss :	0.09


Mean log L2 = -0.41486865282058716

Epoch 16 in 581.26 sec
Train accuracy :	0.997	(59790/60000)		Train loss :	0.017
Val accuracy   :	0.98	(9804/10000)		Val loss :	0.0838


Mean log L2 = -0.39831066131591797

Epoch 17 in 581.58 sec
Train accuracy :	0.996	(59747/60000)		Train loss :	0.019
Val accuracy   :	0.977	(9770/10000)		Val loss :	0.0926


Mean log L2 = -0.4034064710140228

Epoch 18 in 581.06 sec
Train accuracy :	0.996	(59772/60000)		Train loss :	0.0168
Val accuracy   :	0.978	(9784/10000)		Val loss :	0.0935


Mean log L2 = -0.4040311872959137

Epoch 19 in 581.65 sec
Train accuracy :	0.991	(59447/60000)		Train loss :	0.0358
Val accuracy   :	0.973	(9729/10000)		Val loss :	0.116


Mean log L2 = -0.3683003783226013

Epoch 20 in 581.59 sec
Train accuracy :	0.995	(59719/60000)		Train loss :	0.0211
Val accuracy   :	0.976	(9764/10000)		Val loss :	0.1068


Mean log L2 = -0.4346690773963928

Epoch 21 in 581.73 sec
Train accuracy :	0.998	(59874/60000)		Train loss :	0.0117
Val accuracy   :	0.98	(9800/10000)		Val loss :	0.0809


Mean log L2 = -0.4421776831150055

Epoch 22 in 582.79 sec
Train accuracy :	0.998	(59861/60000)		Train loss :	0.0121
Val accuracy   :	0.98	(9797/10000)		Val loss :	0.0952


Mean log L2 = -0.4476287364959717

Epoch 23 in 582.92 sec
Train accuracy :	0.997	(59820/60000)		Train loss :	0.0155
Val accuracy   :	0.983	(9827/10000)		Val loss :	0.0785


Mean log L2 = -0.4522119164466858

Epoch 24 in 579.89 sec
Train accuracy :	0.996	(59768/60000)		Train loss :	0.0199
Val accuracy   :	0.977	(9770/10000)		Val loss :	0.1096


Mean log L2 = -0.41056257486343384

Epoch 25 in 580.74 sec
Train accuracy :	0.998	(59866/60000)		Train loss :	0.0109
Val accuracy   :	0.979	(9792/10000)		Val loss :	0.0912


Mean log L2 = -0.41327720880508423

Epoch 26 in 583.03 sec
Train accuracy :	0.997	(59833/60000)		Train loss :	0.0138
Val accuracy   :	0.978	(9777/10000)		Val loss :	0.1029


Mean log L2 = -0.4330271780490875

Epoch 27 in 583.50 sec
Train accuracy :	0.997	(59820/60000)		Train loss :	0.0147
Val accuracy   :	0.979	(9785/10000)		Val loss :	0.0944


Mean log L2 = -0.3602503538131714

Epoch 28 in 583.82 sec
Train accuracy :	0.998	(59858/60000)		Train loss :	0.0126
Val accuracy   :	0.979	(9791/10000)		Val loss :	0.0975


Mean log L2 = -0.4580167829990387

Epoch 29 in 583.42 sec
Train accuracy :	0.996	(59765/60000)		Train loss :	0.0176
Val accuracy   :	0.976	(9763/10000)		Val loss :	0.1141


Mean log L2 = -0.43446680903434753

Epoch 30 in 580.46 sec
Train accuracy :	0.998	(59889/60000)		Train loss :	0.0113
Val accuracy   :	0.979	(9792/10000)		Val loss :	0.0863


Mean log L2 = -0.4078291952610016

Epoch 31 in 581.03 sec
Train accuracy :	0.998	(59892/60000)		Train loss :	0.0096
Val accuracy   :	0.98	(9797/10000)		Val loss :	0.0977


Mean log L2 = -0.41841769218444824

Epoch 32 in 581.42 sec
Train accuracy :	0.998	(59901/60000)		Train loss :	0.0089
Val accuracy   :	0.98	(9804/10000)		Val loss :	0.0943


Mean log L2 = -0.40089067816734314

Epoch 33 in 581.66 sec
Train accuracy :	0.996	(59788/60000)		Train loss :	0.0161
Val accuracy   :	0.978	(9778/10000)		Val loss :	0.1026


Mean log L2 = -0.4428822100162506

Epoch 34 in 581.92 sec
Train accuracy :	0.998	(59889/60000)		Train loss :	0.0108
Val accuracy   :	0.978	(9778/10000)		Val loss :	0.1038


Mean log L2 = -0.4195508062839508

Epoch 35 in 581.46 sec
Train accuracy :	0.998	(59905/60000)		Train loss :	0.0084
Val accuracy   :	0.981	(9807/10000)		Val loss :	0.0942


Mean log L2 = -0.42457571625709534

Epoch 36 in 581.49 sec
Train accuracy :	0.998	(59905/60000)		Train loss :	0.0091
Val accuracy   :	0.981	(9809/10000)		Val loss :	0.0965


Mean log L2 = -0.4118824005126953

Epoch 37 in 581.23 sec
Train accuracy :	0.996	(59780/60000)		Train loss :	0.0154
Val accuracy   :	0.976	(9762/10000)		Val loss :	0.1092


Mean log L2 = -0.38938015699386597

Epoch 38 in 581.71 sec
Train accuracy :	0.997	(59828/60000)		Train loss :	0.0133
Val accuracy   :	0.977	(9770/10000)		Val loss :	0.1067


Mean log L2 = -0.40399637818336487

Epoch 39 in 581.52 sec
Train accuracy :	0.999	(59935/60000)		Train loss :	0.0073
Val accuracy   :	0.98	(9795/10000)		Val loss :	0.093


Mean log L2 = -0.4331994950771332

Epoch 40 in 581.92 sec
Train accuracy :	0.998	(59859/60000)		Train loss :	0.0135
Val accuracy   :	0.979	(9791/10000)		Val loss :	0.1049


Mean log L2 = -2.683337926864624

Epoch 41 in 581.60 sec
Train accuracy :	0.098	(5851/60000)		Train loss :	2.6717
Val accuracy   :	0.097	(974/10000)		Val loss :	2.6664


Mean log L2 = -3.496521472930908

Epoch 42 in 581.49 sec
Train accuracy :	0.112	(6742/60000)		Train loss :	2.3751
Val accuracy   :	0.114	(1135/10000)		Val loss :	2.372


Mean log L2 = -3.3446781635284424

Epoch 43 in 580.95 sec
Train accuracy :	0.097	(5842/60000)		Train loss :	2.5704
Val accuracy   :	0.098	(982/10000)		Val loss :	2.5719


Mean log L2 = -3.3278415203094482

Epoch 44 in 581.70 sec
Train accuracy :	0.097	(5842/60000)		Train loss :	2.4453
Val accuracy   :	0.098	(982/10000)		Val loss :	2.4436


Mean log L2 = -3.518301486968994

Epoch 45 in 581.78 sec
Train accuracy :	0.099	(5923/60000)		Train loss :	2.792
Val accuracy   :	0.098	(980/10000)		Val loss :	2.7954


Mean log L2 = -3.389507293701172

Epoch 46 in 581.43 sec
Train accuracy :	0.099	(5958/60000)		Train loss :	2.5967
Val accuracy   :	0.103	(1032/10000)		Val loss :	2.5899


Mean log L2 = -3.3295631408691406

Epoch 47 in 581.74 sec
Train accuracy :	0.102	(6131/60000)		Train loss :	2.6717
Val accuracy   :	0.101	(1010/10000)		Val loss :	2.677


Mean log L2 = -3.451956272125244

Epoch 48 in 581.58 sec
Train accuracy :	0.104	(6265/60000)		Train loss :	2.8649
Val accuracy   :	0.103	(1028/10000)		Val loss :	2.8619


Mean log L2 = -3.350301504135132

Epoch 49 in 582.12 sec
Train accuracy :	0.099	(5949/60000)		Train loss :	2.5761
Val accuracy   :	0.101	(1009/10000)		Val loss :	2.5733


Mean log L2 = -3.446791172027588

Epoch 50 in 582.72 sec
Train accuracy :	0.112	(6742/60000)		Train loss :	2.6189
Val accuracy   :	0.114	(1135/10000)		Val loss :	2.6175
