# Supplementary material
Source: ML conference proceedings conference paper supplement (https://proceedings.neurips.cc/paper_files/paper/2022/hash/545a114e655f9d25ba0d56ea9a01fc6e-Abstract.html)
Supplement: Supplementary file 1 [file 545a114e655f9d25ba0d56ea9a01fc6e-Supplemental-Conference.zip › revised_supplemental/code/results/table1/noise/continuous_hep/2022-05-18_18-41-53_xp_mlp_2h256_oscEP_N10_beta4e-1_noise4e-2_run2/log.txt]

python train.py simus/ep/mlp/mnist_runs/noise/continuous_hep_run2.json

Mean log L2 = -0.36396524310112

Epoch 1 in 2450.65 sec
Train accuracy :	0.945	(56715/60000)		Train loss :	0.1998
Val accuracy   :	0.942	(9420/10000)		Val loss :	0.2063


Mean log L2 = -0.34544631838798523

Epoch 2 in 924.31 sec
Train accuracy :	0.967	(58010/60000)		Train loss :	0.1256
Val accuracy   :	0.963	(9625/10000)		Val loss :	0.1381


Mean log L2 = -0.4052731990814209

Epoch 3 in 959.22 sec
Train accuracy :	0.976	(58556/60000)		Train loss :	0.0897
Val accuracy   :	0.967	(9665/10000)		Val loss :	0.1205


Mean log L2 = -0.3887728154659271

Epoch 4 in 956.31 sec
Train accuracy :	0.98	(58793/60000)		Train loss :	0.076
Val accuracy   :	0.97	(9699/10000)		Val loss :	0.1107


Mean log L2 = -0.36592862010002136

Epoch 5 in 963.68 sec
Train accuracy :	0.981	(58874/60000)		Train loss :	0.0694
Val accuracy   :	0.971	(9707/10000)		Val loss :	0.1039


Mean log L2 = -0.42510196566581726

Epoch 6 in 963.28 sec
Train accuracy :	0.986	(59155/60000)		Train loss :	0.0539
Val accuracy   :	0.974	(9738/10000)		Val loss :	0.0932


Mean log L2 = -0.4311080873012543

Epoch 7 in 963.57 sec
Train accuracy :	0.986	(59177/60000)		Train loss :	0.0519
Val accuracy   :	0.973	(9730/10000)		Val loss :	0.0985


Mean log L2 = -0.39087557792663574

Epoch 8 in 962.22 sec
Train accuracy :	0.991	(59431/60000)		Train loss :	0.0379
Val accuracy   :	0.976	(9761/10000)		Val loss :	0.0856


Mean log L2 = -0.400944322347641

Epoch 9 in 967.46 sec
Train accuracy :	0.992	(59507/60000)		Train loss :	0.035
Val accuracy   :	0.977	(9772/10000)		Val loss :	0.0852


Mean log L2 = -0.4018643796443939

Epoch 10 in 969.22 sec
Train accuracy :	0.99	(59413/60000)		Train loss :	0.0384
Val accuracy   :	0.974	(9739/10000)		Val loss :	0.0938


Mean log L2 = -0.4399189054965973

Epoch 11 in 966.57 sec
Train accuracy :	0.99	(59429/60000)		Train loss :	0.0363
Val accuracy   :	0.975	(9751/10000)		Val loss :	0.0991


Mean log L2 = -0.4372410774230957

Epoch 12 in 957.99 sec
Train accuracy :	0.991	(59486/60000)		Train loss :	0.0339
Val accuracy   :	0.974	(9741/10000)		Val loss :	0.097


Mean log L2 = -0.37686437368392944

Epoch 13 in 955.99 sec
Train accuracy :	0.995	(59674/60000)		Train loss :	0.0247
Val accuracy   :	0.978	(9781/10000)		Val loss :	0.0893


Mean log L2 = -0.4345535933971405

Epoch 14 in 962.96 sec
Train accuracy :	0.995	(59704/60000)		Train loss :	0.0224
Val accuracy   :	0.978	(9783/10000)		Val loss :	0.0886


Mean log L2 = -0.4254979193210602

Epoch 15 in 948.29 sec
Train accuracy :	0.996	(59749/60000)		Train loss :	0.0202
Val accuracy   :	0.979	(9789/10000)		Val loss :	0.0897


Mean log L2 = -0.4176386296749115

Epoch 16 in 936.32 sec
Train accuracy :	0.996	(59765/60000)		Train loss :	0.0191
Val accuracy   :	0.979	(9787/10000)		Val loss :	0.088


Mean log L2 = -0.4406374394893646

Epoch 17 in 936.56 sec
Train accuracy :	0.994	(59640/60000)		Train loss :	0.0244
Val accuracy   :	0.976	(9755/10000)		Val loss :	0.103


Mean log L2 = -0.41229015588760376

Epoch 18 in 936.80 sec
Train accuracy :	0.995	(59728/60000)		Train loss :	0.0211
Val accuracy   :	0.977	(9769/10000)		Val loss :	0.0979


Mean log L2 = -0.42660513520240784

Epoch 19 in 936.64 sec
Train accuracy :	0.997	(59790/60000)		Train loss :	0.0165
Val accuracy   :	0.977	(9769/10000)		Val loss :	0.1001


Mean log L2 = -0.4225299060344696

Epoch 20 in 936.31 sec
Train accuracy :	0.996	(59785/60000)		Train loss :	0.0171
Val accuracy   :	0.976	(9755/10000)		Val loss :	0.0999


Mean log L2 = -0.3908633589744568

Epoch 21 in 936.23 sec
Train accuracy :	0.995	(59718/60000)		Train loss :	0.0216
Val accuracy   :	0.978	(9781/10000)		Val loss :	0.1005


Mean log L2 = -0.41011640429496765

Epoch 22 in 936.96 sec
Train accuracy :	0.997	(59791/60000)		Train loss :	0.0161
Val accuracy   :	0.977	(9766/10000)		Val loss :	0.1034


Mean log L2 = -0.3496338725090027

Epoch 23 in 936.34 sec
Train accuracy :	0.998	(59862/60000)		Train loss :	0.0122
Val accuracy   :	0.978	(9783/10000)		Val loss :	0.0956


Mean log L2 = -0.43000274896621704

Epoch 24 in 937.02 sec
Train accuracy :	0.995	(59714/60000)		Train loss :	0.0226
Val accuracy   :	0.976	(9757/10000)		Val loss :	0.1126


Mean log L2 = -0.4936712384223938

Epoch 25 in 936.44 sec
Train accuracy :	0.996	(59745/60000)		Train loss :	0.0193
Val accuracy   :	0.974	(9740/10000)		Val loss :	0.1052


Mean log L2 = -0.3830084502696991

Epoch 26 in 936.53 sec
Train accuracy :	0.997	(59825/60000)		Train loss :	0.0154
Val accuracy   :	0.978	(9782/10000)		Val loss :	0.0997


Mean log L2 = -0.3716876208782196

Epoch 27 in 937.35 sec
Train accuracy :	0.995	(59706/60000)		Train loss :	0.023
Val accuracy   :	0.975	(9750/10000)		Val loss :	0.1173


Mean log L2 = -0.3973329961299896

Epoch 28 in 935.93 sec
Train accuracy :	0.994	(59641/60000)		Train loss :	0.0267
Val accuracy   :	0.974	(9744/10000)		Val loss :	0.1179


Mean log L2 = -0.404695987701416

Epoch 29 in 936.60 sec
Train accuracy :	0.995	(59702/60000)		Train loss :	0.0235
Val accuracy   :	0.975	(9752/10000)		Val loss :	0.1104


Mean log L2 = -0.43495336174964905

Epoch 30 in 936.88 sec
Train accuracy :	0.998	(59888/60000)		Train loss :	0.0107
Val accuracy   :	0.977	(9771/10000)		Val loss :	0.1108


Mean log L2 = -0.41649776697158813

Epoch 31 in 937.14 sec
Train accuracy :	0.996	(59765/60000)		Train loss :	0.0172
Val accuracy   :	0.976	(9758/10000)		Val loss :	0.107


Mean log L2 = -0.36643972992897034

Epoch 32 in 936.38 sec
Train accuracy :	0.996	(59748/60000)		Train loss :	0.0192
Val accuracy   :	0.976	(9764/10000)		Val loss :	0.1084


Mean log L2 = -0.4574778974056244

Epoch 33 in 937.43 sec
Train accuracy :	0.997	(59848/60000)		Train loss :	0.0122
Val accuracy   :	0.976	(9758/10000)		Val loss :	0.1103


Mean log L2 = -0.40434905886650085

Epoch 34 in 937.90 sec
Train accuracy :	0.998	(59851/60000)		Train loss :	0.0139
Val accuracy   :	0.976	(9763/10000)		Val loss :	0.1137


Mean log L2 = -0.41299960017204285

Epoch 35 in 937.56 sec
Train accuracy :	0.995	(59723/60000)		Train loss :	0.0186
Val accuracy   :	0.977	(9768/10000)		Val loss :	0.1116


Mean log L2 = -0.4131413996219635

Epoch 36 in 937.66 sec
Train accuracy :	0.998	(59874/60000)		Train loss :	0.0113
Val accuracy   :	0.979	(9787/10000)		Val loss :	0.1065


Mean log L2 = -0.43922874331474304

Epoch 37 in 937.09 sec
Train accuracy :	0.998	(59862/60000)		Train loss :	0.0116
Val accuracy   :	0.978	(9784/10000)		Val loss :	0.106


Mean log L2 = -0.3344402015209198

Epoch 38 in 937.06 sec
Train accuracy :	0.996	(59735/60000)		Train loss :	0.0207
Val accuracy   :	0.973	(9726/10000)		Val loss :	0.1314


Mean log L2 = -0.4020649492740631

Epoch 39 in 936.52 sec
Train accuracy :	0.998	(59862/60000)		Train loss :	0.0128
Val accuracy   :	0.978	(9777/10000)		Val loss :	0.1082


Mean log L2 = -0.4405207335948944

Epoch 40 in 936.70 sec
Train accuracy :	0.998	(59866/60000)		Train loss :	0.011
Val accuracy   :	0.979	(9789/10000)		Val loss :	0.1086


Mean log L2 = -0.40928784012794495

Epoch 41 in 936.65 sec
Train accuracy :	0.997	(59841/60000)		Train loss :	0.0133
Val accuracy   :	0.977	(9773/10000)		Val loss :	0.1042


Mean log L2 = -0.4336186349391937

Epoch 42 in 936.74 sec
Train accuracy :	0.998	(59893/60000)		Train loss :	0.0089
Val accuracy   :	0.978	(9784/10000)		Val loss :	0.1056


Mean log L2 = -0.4346166253089905

Epoch 43 in 936.70 sec
Train accuracy :	0.997	(59839/60000)		Train loss :	0.0138
Val accuracy   :	0.978	(9776/10000)		Val loss :	0.1133


Mean log L2 = -0.4332807958126068

Epoch 44 in 936.67 sec
Train accuracy :	0.998	(59894/60000)		Train loss :	0.0107
Val accuracy   :	0.977	(9772/10000)		Val loss :	0.1074


Mean log L2 = -0.41085729002952576

Epoch 45 in 936.74 sec
Train accuracy :	0.998	(59882/60000)		Train loss :	0.01
Val accuracy   :	0.978	(9776/10000)		Val loss :	0.1083


Mean log L2 = -0.388082891702652

Epoch 46 in 936.88 sec
Train accuracy :	0.998	(59862/60000)		Train loss :	0.012
Val accuracy   :	0.976	(9761/10000)		Val loss :	0.1142


Mean log L2 = -0.44199201464653015

Epoch 47 in 936.52 sec
Train accuracy :	0.996	(59779/60000)		Train loss :	0.0176
Val accuracy   :	0.975	(9748/10000)		Val loss :	0.1243


Mean log L2 = -0.4085097312927246

Epoch 48 in 937.08 sec
Train accuracy :	0.997	(59798/60000)		Train loss :	0.0151
Val accuracy   :	0.974	(9742/10000)		Val loss :	0.1119


Mean log L2 = -0.3927081227302551

Epoch 49 in 936.52 sec
Train accuracy :	0.994	(59662/60000)		Train loss :	0.0292
Val accuracy   :	0.973	(9731/10000)		Val loss :	0.1325


Mean log L2 = -0.43180355429649353

Epoch 50 in 936.43 sec
Train accuracy :	0.997	(59847/60000)		Train loss :	0.0127
Val accuracy   :	0.978	(9778/10000)		Val loss :	0.106
