# Supplementary material
Source: ML conference proceedings conference paper supplement (https://proceedings.neurips.cc/paper_files/paper/2022/hash/545a114e655f9d25ba0d56ea9a01fc6e-Abstract.html)
Supplement: Supplementary file 1 [file 545a114e655f9d25ba0d56ea9a01fc6e-Supplemental-Conference.zip › revised_supplemental/code/results/table1/noise/continuous_hep/2022-05-18_22-28-21_xp_mlp_2h256_oscEP_N10_beta4e-1_noise4e-2_run3/log.txt]

python train.py simus/ep/mlp/mnist_runs/noise/continuous_hep_run3.json

Mean log L2 = -0.411393940448761

Epoch 1 in 2265.57 sec
Train accuracy :	0.949	(56957/60000)		Train loss :	0.1866
Val accuracy   :	0.945	(9453/10000)		Val loss :	0.1985


Mean log L2 = -0.3706795275211334

Epoch 2 in 887.18 sec
Train accuracy :	0.959	(57562/60000)		Train loss :	0.1457
Val accuracy   :	0.955	(9546/10000)		Val loss :	0.157


Mean log L2 = -0.332310289144516

Epoch 3 in 920.35 sec
Train accuracy :	0.974	(58454/60000)		Train loss :	0.0947
Val accuracy   :	0.966	(9662/10000)		Val loss :	0.1208


Mean log L2 = -0.3730050027370453

Epoch 4 in 919.55 sec
Train accuracy :	0.981	(58837/60000)		Train loss :	0.0728
Val accuracy   :	0.969	(9692/10000)		Val loss :	0.1043


Mean log L2 = -0.36683088541030884

Epoch 5 in 920.09 sec
Train accuracy :	0.981	(58839/60000)		Train loss :	0.0711
Val accuracy   :	0.97	(9696/10000)		Val loss :	0.1122


Mean log L2 = -0.3224697709083557

Epoch 6 in 920.66 sec
Train accuracy :	0.987	(59236/60000)		Train loss :	0.0494
Val accuracy   :	0.976	(9757/10000)		Val loss :	0.0891


Mean log L2 = -0.4146706163883209

Epoch 7 in 920.32 sec
Train accuracy :	0.987	(59240/60000)		Train loss :	0.0496
Val accuracy   :	0.974	(9739/10000)		Val loss :	0.0971


Mean log L2 = -0.37880420684814453

Epoch 8 in 920.08 sec
Train accuracy :	0.987	(59208/60000)		Train loss :	0.0546
Val accuracy   :	0.973	(9732/10000)		Val loss :	0.0963


Mean log L2 = -0.4571805000305176

Epoch 9 in 920.51 sec
Train accuracy :	0.99	(59410/60000)		Train loss :	0.0382
Val accuracy   :	0.975	(9752/10000)		Val loss :	0.0959


Mean log L2 = -0.4054695665836334

Epoch 10 in 919.80 sec
Train accuracy :	0.993	(59553/60000)		Train loss :	0.0319
Val accuracy   :	0.979	(9785/10000)		Val loss :	0.0836


Mean log L2 = -0.38275378942489624

Epoch 11 in 920.49 sec
Train accuracy :	0.989	(59315/60000)		Train loss :	0.0453
Val accuracy   :	0.975	(9748/10000)		Val loss :	0.1003


Mean log L2 = -0.3797902762889862

Epoch 12 in 920.18 sec
Train accuracy :	0.995	(59677/60000)		Train loss :	0.0241
Val accuracy   :	0.978	(9783/10000)		Val loss :	0.0871


Mean log L2 = -0.4077264964580536

Epoch 13 in 920.31 sec
Train accuracy :	0.994	(59649/60000)		Train loss :	0.0257
Val accuracy   :	0.979	(9789/10000)		Val loss :	0.0847


Mean log L2 = -0.41063451766967773

Epoch 14 in 920.62 sec
Train accuracy :	0.995	(59702/60000)		Train loss :	0.0205
Val accuracy   :	0.981	(9812/10000)		Val loss :	0.0794


Mean log L2 = -0.40470966696739197

Epoch 15 in 920.42 sec
Train accuracy :	0.995	(59688/60000)		Train loss :	0.0228
Val accuracy   :	0.977	(9772/10000)		Val loss :	0.0949


Mean log L2 = -0.45165544748306274

Epoch 16 in 919.90 sec
Train accuracy :	0.996	(59776/60000)		Train loss :	0.0168
Val accuracy   :	0.98	(9804/10000)		Val loss :	0.0873


Mean log L2 = -0.37443703413009644

Epoch 17 in 921.38 sec
Train accuracy :	0.994	(59661/60000)		Train loss :	0.0245
Val accuracy   :	0.975	(9748/10000)		Val loss :	0.102


Mean log L2 = -0.3786996006965637

Epoch 18 in 920.33 sec
Train accuracy :	0.995	(59690/60000)		Train loss :	0.0224
Val accuracy   :	0.977	(9767/10000)		Val loss :	0.1071


Mean log L2 = -0.4593674838542938

Epoch 19 in 921.08 sec
Train accuracy :	0.996	(59758/60000)		Train loss :	0.0192
Val accuracy   :	0.976	(9757/10000)		Val loss :	0.1086


Mean log L2 = -0.45937010645866394

Epoch 20 in 921.68 sec
Train accuracy :	0.996	(59768/60000)		Train loss :	0.0182
Val accuracy   :	0.976	(9758/10000)		Val loss :	0.1064


Mean log L2 = -0.43811437487602234

Epoch 21 in 921.24 sec
Train accuracy :	0.995	(59711/60000)		Train loss :	0.0239
Val accuracy   :	0.978	(9777/10000)		Val loss :	0.1016


Mean log L2 = -0.449251264333725

Epoch 22 in 920.80 sec
Train accuracy :	0.995	(59717/60000)		Train loss :	0.0213
Val accuracy   :	0.977	(9771/10000)		Val loss :	0.1032


Mean log L2 = -0.3379412591457367

Epoch 23 in 920.33 sec
Train accuracy :	0.996	(59774/60000)		Train loss :	0.0187
Val accuracy   :	0.978	(9776/10000)		Val loss :	0.0991


Mean log L2 = -0.37445351481437683

Epoch 24 in 920.85 sec
Train accuracy :	0.997	(59848/60000)		Train loss :	0.0128
Val accuracy   :	0.979	(9790/10000)		Val loss :	0.0978


Mean log L2 = -0.38174447417259216

Epoch 25 in 920.46 sec
Train accuracy :	0.997	(59834/60000)		Train loss :	0.015
Val accuracy   :	0.978	(9780/10000)		Val loss :	0.0969


Mean log L2 = -0.3860355019569397

Epoch 26 in 920.16 sec
Train accuracy :	0.997	(59799/60000)		Train loss :	0.0155
Val accuracy   :	0.98	(9799/10000)		Val loss :	0.0906


Mean log L2 = -0.4195285439491272

Epoch 27 in 920.43 sec
Train accuracy :	0.995	(59726/60000)		Train loss :	0.0222
Val accuracy   :	0.976	(9759/10000)		Val loss :	0.1106


Mean log L2 = -0.395989328622818

Epoch 28 in 920.07 sec
Train accuracy :	0.996	(59780/60000)		Train loss :	0.0168
Val accuracy   :	0.976	(9757/10000)		Val loss :	0.1132


Mean log L2 = -0.4055290222167969

Epoch 29 in 920.43 sec
Train accuracy :	0.997	(59842/60000)		Train loss :	0.0121
Val accuracy   :	0.979	(9790/10000)		Val loss :	0.0976


Mean log L2 = -0.4761699140071869

Epoch 30 in 919.90 sec
Train accuracy :	0.997	(59793/60000)		Train loss :	0.0164
Val accuracy   :	0.978	(9780/10000)		Val loss :	0.1075


Mean log L2 = -0.4248637855052948

Epoch 31 in 921.35 sec
Train accuracy :	0.997	(59814/60000)		Train loss :	0.0144
Val accuracy   :	0.978	(9778/10000)		Val loss :	0.102


Mean log L2 = -0.394524484872818

Epoch 32 in 920.33 sec
Train accuracy :	0.997	(59846/60000)		Train loss :	0.0134
Val accuracy   :	0.977	(9773/10000)		Val loss :	0.1063


Mean log L2 = -0.35364392399787903

Epoch 33 in 920.22 sec
Train accuracy :	0.997	(59830/60000)		Train loss :	0.0139
Val accuracy   :	0.979	(9786/10000)		Val loss :	0.1054


Mean log L2 = -0.4393676221370697

Epoch 34 in 920.42 sec
Train accuracy :	0.997	(59793/60000)		Train loss :	0.0178
Val accuracy   :	0.977	(9774/10000)		Val loss :	0.1176


Mean log L2 = -0.3907874524593353

Epoch 35 in 920.25 sec
Train accuracy :	0.995	(59686/60000)		Train loss :	0.0218
Val accuracy   :	0.976	(9758/10000)		Val loss :	0.1167


Mean log L2 = -0.43701910972595215

Epoch 36 in 920.58 sec
Train accuracy :	0.998	(59868/60000)		Train loss :	0.0119
Val accuracy   :	0.978	(9784/10000)		Val loss :	0.1052


Mean log L2 = -0.40972310304641724

Epoch 37 in 916.35 sec
Train accuracy :	0.996	(59755/60000)		Train loss :	0.0212
Val accuracy   :	0.977	(9772/10000)		Val loss :	0.1152


Mean log L2 = -0.4023544490337372

Epoch 38 in 902.00 sec
Train accuracy :	0.998	(59906/60000)		Train loss :	0.0092
Val accuracy   :	0.979	(9790/10000)		Val loss :	0.1017


Mean log L2 = -0.42268872261047363

Epoch 39 in 902.49 sec
Train accuracy :	0.996	(59759/60000)		Train loss :	0.0203
Val accuracy   :	0.977	(9767/10000)		Val loss :	0.1177


Mean log L2 = -0.40951237082481384

Epoch 40 in 902.10 sec
Train accuracy :	0.996	(59779/60000)		Train loss :	0.0169
Val accuracy   :	0.979	(9785/10000)		Val loss :	0.1008


Mean log L2 = -0.44790706038475037

Epoch 41 in 902.75 sec
Train accuracy :	0.998	(59857/60000)		Train loss :	0.0118
Val accuracy   :	0.98	(9798/10000)		Val loss :	0.0942


Mean log L2 = -0.41353902220726013

Epoch 42 in 901.81 sec
Train accuracy :	0.998	(59872/60000)		Train loss :	0.011
Val accuracy   :	0.979	(9785/10000)		Val loss :	0.0965


Mean log L2 = -0.43213149905204773

Epoch 43 in 902.25 sec
Train accuracy :	0.996	(59784/60000)		Train loss :	0.0171
Val accuracy   :	0.978	(9784/10000)		Val loss :	0.1062


Mean log L2 = -0.4440474212169647

Epoch 44 in 901.87 sec
Train accuracy :	0.999	(59937/60000)		Train loss :	0.0064
Val accuracy   :	0.98	(9804/10000)		Val loss :	0.0938


Mean log L2 = -0.44142112135887146

Epoch 45 in 903.07 sec
Train accuracy :	0.998	(59890/60000)		Train loss :	0.0098
Val accuracy   :	0.98	(9802/10000)		Val loss :	0.0997


Mean log L2 = -0.4310409724712372

Epoch 46 in 902.50 sec
Train accuracy :	0.999	(59924/60000)		Train loss :	0.008
Val accuracy   :	0.98	(9802/10000)		Val loss :	0.1046


Mean log L2 = -0.42707476019859314

Epoch 47 in 914.03 sec
Train accuracy :	0.998	(59880/60000)		Train loss :	0.011
Val accuracy   :	0.978	(9780/10000)		Val loss :	0.1076


Mean log L2 = -0.4399617314338684

Epoch 48 in 910.00 sec
Train accuracy :	0.998	(59857/60000)		Train loss :	0.0124
Val accuracy   :	0.978	(9778/10000)		Val loss :	0.1084


Mean log L2 = -0.3884434700012207

Epoch 49 in 951.40 sec
Train accuracy :	0.997	(59806/60000)		Train loss :	0.0166
Val accuracy   :	0.977	(9768/10000)		Val loss :	0.123


Mean log L2 = -0.41753849387168884

Epoch 50 in 949.58 sec
Train accuracy :	0.998	(59879/60000)		Train loss :	0.0113
Val accuracy   :	0.98	(9801/10000)		Val loss :	0.1075
