# Supplementary material
Source: ML conference proceedings conference paper supplement (https://proceedings.neurips.cc/paper_files/paper/2022/hash/545a114e655f9d25ba0d56ea9a01fc6e-Abstract.html)
Supplement: Supplementary file 1 [file 545a114e655f9d25ba0d56ea9a01fc6e-Supplemental-Conference.zip › revised_supplemental/code/results/table1/noise/hep/2022-05-18_16-34-03_xp_mlp_2h256_ep10_beta4e-1_noise4e-2_run1/log.txt]

python train.py simus/ep/mlp/mnist_runs/noise/hep_run1.json

Mean log L2 = -5.78376579284668

Epoch 1 in 3958.89 sec
Train accuracy :	0.944	(56651/60000)		Train loss :	0.1983
Val accuracy   :	0.939	(9393/10000)		Val loss :	0.2045


Mean log L2 = -5.892962455749512

Epoch 2 in 139.28 sec
Train accuracy :	0.961	(57632/60000)		Train loss :	0.1435
Val accuracy   :	0.956	(9561/10000)		Val loss :	0.161


Mean log L2 = -5.877467632293701

Epoch 3 in 139.45 sec
Train accuracy :	0.97	(58196/60000)		Train loss :	0.1068
Val accuracy   :	0.964	(9640/10000)		Val loss :	0.1308


Mean log L2 = -5.89137077331543

Epoch 4 in 140.51 sec
Train accuracy :	0.972	(58348/60000)		Train loss :	0.1024
Val accuracy   :	0.965	(9654/10000)		Val loss :	0.1297


Mean log L2 = -5.875242233276367

Epoch 5 in 140.47 sec
Train accuracy :	0.981	(58881/60000)		Train loss :	0.0736
Val accuracy   :	0.972	(9718/10000)		Val loss :	0.1037


Mean log L2 = -5.8963446617126465

Epoch 6 in 140.98 sec
Train accuracy :	0.983	(58972/60000)		Train loss :	0.0669
Val accuracy   :	0.971	(9708/10000)		Val loss :	0.1086


Mean log L2 = -5.852192401885986

Epoch 7 in 141.82 sec
Train accuracy :	0.984	(59022/60000)		Train loss :	0.0611
Val accuracy   :	0.973	(9734/10000)		Val loss :	0.0985


Mean log L2 = -5.868821620941162

Epoch 8 in 142.59 sec
Train accuracy :	0.985	(59105/60000)		Train loss :	0.058
Val accuracy   :	0.973	(9726/10000)		Val loss :	0.1006


Mean log L2 = -5.868638515472412

Epoch 9 in 139.86 sec
Train accuracy :	0.988	(59291/60000)		Train loss :	0.0461
Val accuracy   :	0.976	(9760/10000)		Val loss :	0.0921


Mean log L2 = -5.85326623916626

Epoch 10 in 141.06 sec
Train accuracy :	0.989	(59347/60000)		Train loss :	0.042
Val accuracy   :	0.975	(9747/10000)		Val loss :	0.0933


Mean log L2 = -5.866331577301025

Epoch 11 in 141.73 sec
Train accuracy :	0.989	(59355/60000)		Train loss :	0.0436
Val accuracy   :	0.975	(9751/10000)		Val loss :	0.0944


Mean log L2 = -5.878123760223389

Epoch 12 in 142.01 sec
Train accuracy :	0.99	(59380/60000)		Train loss :	0.0407
Val accuracy   :	0.974	(9736/10000)		Val loss :	0.0968


Mean log L2 = -5.875773906707764

Epoch 13 in 140.93 sec
Train accuracy :	0.991	(59479/60000)		Train loss :	0.0341
Val accuracy   :	0.974	(9741/10000)		Val loss :	0.1005


Mean log L2 = -5.859837532043457

Epoch 14 in 142.63 sec
Train accuracy :	0.991	(59455/60000)		Train loss :	0.0378
Val accuracy   :	0.975	(9747/10000)		Val loss :	0.0972


Mean log L2 = -5.866934776306152

Epoch 15 in 142.16 sec
Train accuracy :	0.994	(59632/60000)		Train loss :	0.0262
Val accuracy   :	0.979	(9789/10000)		Val loss :	0.0868


Mean log L2 = -5.878432750701904

Epoch 16 in 140.64 sec
Train accuracy :	0.994	(59666/60000)		Train loss :	0.0237
Val accuracy   :	0.98	(9796/10000)		Val loss :	0.0839


Mean log L2 = -5.867491722106934

Epoch 17 in 140.20 sec
Train accuracy :	0.995	(59672/60000)		Train loss :	0.0241
Val accuracy   :	0.976	(9761/10000)		Val loss :	0.0954


Mean log L2 = -5.8516082763671875

Epoch 18 in 143.51 sec
Train accuracy :	0.994	(59662/60000)		Train loss :	0.0242
Val accuracy   :	0.977	(9770/10000)		Val loss :	0.0915


Mean log L2 = -5.783715724945068

Epoch 19 in 142.67 sec
Train accuracy :	0.994	(59634/60000)		Train loss :	0.0261
Val accuracy   :	0.976	(9758/10000)		Val loss :	0.0963


Mean log L2 = -5.7588348388671875

Epoch 20 in 142.72 sec
Train accuracy :	0.996	(59761/60000)		Train loss :	0.0197
Val accuracy   :	0.976	(9761/10000)		Val loss :	0.1


Mean log L2 = -5.8976945877075195

Epoch 21 in 144.95 sec
Train accuracy :	0.996	(59767/60000)		Train loss :	0.0177
Val accuracy   :	0.98	(9801/10000)		Val loss :	0.0878


Mean log L2 = -5.873341083526611

Epoch 22 in 143.56 sec
Train accuracy :	0.995	(59712/60000)		Train loss :	0.0214
Val accuracy   :	0.975	(9748/10000)		Val loss :	0.0998


Mean log L2 = -5.86358118057251

Epoch 23 in 139.03 sec
Train accuracy :	0.996	(59779/60000)		Train loss :	0.019
Val accuracy   :	0.979	(9788/10000)		Val loss :	0.0891


Mean log L2 = -5.874696254730225

Epoch 24 in 139.02 sec
Train accuracy :	0.996	(59778/60000)		Train loss :	0.0183
Val accuracy   :	0.978	(9784/10000)		Val loss :	0.0885


Mean log L2 = -5.82101583480835

Epoch 25 in 137.09 sec
Train accuracy :	0.997	(59797/60000)		Train loss :	0.0168
Val accuracy   :	0.98	(9800/10000)		Val loss :	0.0871


Mean log L2 = -5.870094299316406

Epoch 26 in 137.84 sec
Train accuracy :	0.997	(59799/60000)		Train loss :	0.0172
Val accuracy   :	0.977	(9767/10000)		Val loss :	0.0957


Mean log L2 = -5.868453502655029

Epoch 27 in 136.98 sec
Train accuracy :	0.997	(59804/60000)		Train loss :	0.0154
Val accuracy   :	0.977	(9773/10000)		Val loss :	0.101


Mean log L2 = -5.767285346984863

Epoch 28 in 138.94 sec
Train accuracy :	0.997	(59842/60000)		Train loss :	0.0144
Val accuracy   :	0.977	(9771/10000)		Val loss :	0.0925


Mean log L2 = -5.845726490020752

Epoch 29 in 140.26 sec
Train accuracy :	0.996	(59752/60000)		Train loss :	0.0189
Val accuracy   :	0.977	(9768/10000)		Val loss :	0.0996


Mean log L2 = -5.8600053787231445

Epoch 30 in 140.15 sec
Train accuracy :	0.997	(59829/60000)		Train loss :	0.015
Val accuracy   :	0.977	(9766/10000)		Val loss :	0.0956


Mean log L2 = -5.809850215911865

Epoch 31 in 141.18 sec
Train accuracy :	0.997	(59832/60000)		Train loss :	0.0149
Val accuracy   :	0.978	(9781/10000)		Val loss :	0.0933


Mean log L2 = -5.858262062072754

Epoch 32 in 141.48 sec
Train accuracy :	0.998	(59878/60000)		Train loss :	0.0126
Val accuracy   :	0.979	(9785/10000)		Val loss :	0.0857


Mean log L2 = -5.874523639678955

Epoch 33 in 140.11 sec
Train accuracy :	0.997	(59836/60000)		Train loss :	0.0139
Val accuracy   :	0.978	(9783/10000)		Val loss :	0.0985


Mean log L2 = -5.876316070556641

Epoch 34 in 138.07 sec
Train accuracy :	0.997	(59824/60000)		Train loss :	0.0153
Val accuracy   :	0.977	(9772/10000)		Val loss :	0.094


Mean log L2 = -5.8766913414001465

Epoch 35 in 139.08 sec
Train accuracy :	0.998	(59862/60000)		Train loss :	0.0122
Val accuracy   :	0.977	(9772/10000)		Val loss :	0.0984


Mean log L2 = -5.863986968994141

Epoch 36 in 137.02 sec
Train accuracy :	0.998	(59863/60000)		Train loss :	0.0121
Val accuracy   :	0.979	(9794/10000)		Val loss :	0.095


Mean log L2 = -5.866324424743652

Epoch 37 in 139.77 sec
Train accuracy :	0.997	(59825/60000)		Train loss :	0.0137
Val accuracy   :	0.976	(9762/10000)		Val loss :	0.1024


Mean log L2 = -5.851018905639648

Epoch 38 in 140.76 sec
Train accuracy :	0.996	(59746/60000)		Train loss :	0.0193
Val accuracy   :	0.975	(9754/10000)		Val loss :	0.1048


Mean log L2 = -5.858862400054932

Epoch 39 in 138.68 sec
Train accuracy :	0.998	(59876/60000)		Train loss :	0.0108
Val accuracy   :	0.978	(9779/10000)		Val loss :	0.098


Mean log L2 = -5.8489484786987305

Epoch 40 in 137.15 sec
Train accuracy :	0.997	(59792/60000)		Train loss :	0.0163
Val accuracy   :	0.978	(9779/10000)		Val loss :	0.092


Mean log L2 = -5.863292694091797

Epoch 41 in 138.55 sec
Train accuracy :	0.997	(59793/60000)		Train loss :	0.0167
Val accuracy   :	0.976	(9762/10000)		Val loss :	0.1069


Mean log L2 = -5.8697004318237305

Epoch 42 in 138.67 sec
Train accuracy :	0.996	(59789/60000)		Train loss :	0.0171
Val accuracy   :	0.976	(9761/10000)		Val loss :	0.1143


Mean log L2 = -5.833428859710693

Epoch 43 in 138.47 sec
Train accuracy :	0.996	(59761/60000)		Train loss :	0.0177
Val accuracy   :	0.977	(9766/10000)		Val loss :	0.104


Mean log L2 = -5.863399028778076

Epoch 44 in 139.53 sec
Train accuracy :	0.997	(59840/60000)		Train loss :	0.0147
Val accuracy   :	0.979	(9785/10000)		Val loss :	0.1057


Mean log L2 = -5.845278263092041

Epoch 45 in 136.83 sec
Train accuracy :	0.998	(59850/60000)		Train loss :	0.0137
Val accuracy   :	0.979	(9785/10000)		Val loss :	0.0951


Mean log L2 = -5.8509392738342285

Epoch 46 in 134.19 sec
Train accuracy :	0.997	(59846/60000)		Train loss :	0.0122
Val accuracy   :	0.979	(9794/10000)		Val loss :	0.0937


Mean log L2 = -5.8575310707092285

Epoch 47 in 134.23 sec
Train accuracy :	0.998	(59865/60000)		Train loss :	0.0128
Val accuracy   :	0.98	(9795/10000)		Val loss :	0.0938


Mean log L2 = -5.862610816955566

Epoch 48 in 134.20 sec
Train accuracy :	0.997	(59803/60000)		Train loss :	0.019
Val accuracy   :	0.977	(9769/10000)		Val loss :	0.1098


Mean log L2 = -5.854809761047363

Epoch 49 in 135.21 sec
Train accuracy :	0.998	(59901/60000)		Train loss :	0.0091
Val accuracy   :	0.979	(9793/10000)		Val loss :	0.0961


Mean log L2 = -5.85335111618042

Epoch 50 in 133.97 sec
Train accuracy :	0.998	(59872/60000)		Train loss :	0.0106
Val accuracy   :	0.981	(9812/10000)		Val loss :	0.0857
