# Supplementary material
Source: ML conference proceedings conference paper supplement (https://proceedings.neurips.cc/paper_files/paper/2022/hash/545a114e655f9d25ba0d56ea9a01fc6e-Abstract.html)
Supplement: Supplementary file 1 [file 545a114e655f9d25ba0d56ea9a01fc6e-Supplemental-Conference.zip › revised_supplemental/code/results/table1/noise/hep/2022-05-18_16-44-22_xp_mlp_2h256_ep10_beta4e-1_noise4e-2_run3/log.txt]

python train.py simus/ep/mlp/mnist_runs/noise/hep_run3.json

Mean log L2 = -5.890200614929199

Epoch 1 in 4064.63 sec
Train accuracy :	0.947	(56808/60000)		Train loss :	0.1942
Val accuracy   :	0.943	(9429/10000)		Val loss :	0.2039


Mean log L2 = -5.8753886222839355

Epoch 2 in 132.13 sec
Train accuracy :	0.962	(57748/60000)		Train loss :	0.1372
Val accuracy   :	0.958	(9578/10000)		Val loss :	0.1503


Mean log L2 = -5.866664886474609

Epoch 3 in 131.89 sec
Train accuracy :	0.973	(58409/60000)		Train loss :	0.0989
Val accuracy   :	0.964	(9640/10000)		Val loss :	0.1266


Mean log L2 = -5.869905948638916

Epoch 4 in 132.05 sec
Train accuracy :	0.976	(58572/60000)		Train loss :	0.0898
Val accuracy   :	0.966	(9656/10000)		Val loss :	0.1226


Mean log L2 = -5.8627848625183105

Epoch 5 in 131.77 sec
Train accuracy :	0.977	(58614/60000)		Train loss :	0.0853
Val accuracy   :	0.967	(9669/10000)		Val loss :	0.117


Mean log L2 = -5.8518900871276855

Epoch 6 in 131.99 sec
Train accuracy :	0.984	(59058/60000)		Train loss :	0.06
Val accuracy   :	0.971	(9708/10000)		Val loss :	0.1027


Mean log L2 = -5.878747463226318

Epoch 7 in 131.63 sec
Train accuracy :	0.988	(59270/60000)		Train loss :	0.0491
Val accuracy   :	0.977	(9766/10000)		Val loss :	0.09


Mean log L2 = -5.873706817626953

Epoch 8 in 132.06 sec
Train accuracy :	0.987	(59212/60000)		Train loss :	0.0516
Val accuracy   :	0.973	(9731/10000)		Val loss :	0.0947


Mean log L2 = -5.866048336029053

Epoch 9 in 131.62 sec
Train accuracy :	0.99	(59378/60000)		Train loss :	0.0423
Val accuracy   :	0.976	(9760/10000)		Val loss :	0.0895


Mean log L2 = -5.8432135581970215

Epoch 10 in 132.06 sec
Train accuracy :	0.991	(59470/60000)		Train loss :	0.0396
Val accuracy   :	0.976	(9757/10000)		Val loss :	0.0918


Mean log L2 = -5.860806941986084

Epoch 11 in 131.62 sec
Train accuracy :	0.991	(59449/60000)		Train loss :	0.0373
Val accuracy   :	0.975	(9747/10000)		Val loss :	0.0926


Mean log L2 = -5.846771240234375

Epoch 12 in 132.03 sec
Train accuracy :	0.991	(59450/60000)		Train loss :	0.0369
Val accuracy   :	0.977	(9767/10000)		Val loss :	0.0901


Mean log L2 = -5.855819225311279

Epoch 13 in 131.55 sec
Train accuracy :	0.992	(59521/60000)		Train loss :	0.0345
Val accuracy   :	0.976	(9764/10000)		Val loss :	0.0869


Mean log L2 = -5.867909908294678

Epoch 14 in 131.79 sec
Train accuracy :	0.992	(59542/60000)		Train loss :	0.0311
Val accuracy   :	0.977	(9765/10000)		Val loss :	0.0882


Mean log L2 = -5.848023414611816

Epoch 15 in 131.68 sec
Train accuracy :	0.994	(59622/60000)		Train loss :	0.0269
Val accuracy   :	0.976	(9763/10000)		Val loss :	0.0948


Mean log L2 = -5.854290962219238

Epoch 16 in 131.78 sec
Train accuracy :	0.994	(59641/60000)		Train loss :	0.0248
Val accuracy   :	0.977	(9769/10000)		Val loss :	0.0905


Mean log L2 = -5.859626770019531

Epoch 17 in 132.02 sec
Train accuracy :	0.994	(59633/60000)		Train loss :	0.027
Val accuracy   :	0.977	(9770/10000)		Val loss :	0.0912


Mean log L2 = -5.857642650604248

Epoch 18 in 131.75 sec
Train accuracy :	0.996	(59740/60000)		Train loss :	0.0193
Val accuracy   :	0.977	(9773/10000)		Val loss :	0.0885


Mean log L2 = -5.827812671661377

Epoch 19 in 131.65 sec
Train accuracy :	0.993	(59565/60000)		Train loss :	0.0296
Val accuracy   :	0.975	(9752/10000)		Val loss :	0.1024


Mean log L2 = -5.864902019500732

Epoch 20 in 131.45 sec
Train accuracy :	0.994	(59652/60000)		Train loss :	0.0239
Val accuracy   :	0.977	(9770/10000)		Val loss :	0.0994


Mean log L2 = -5.861359119415283

Epoch 21 in 131.94 sec
Train accuracy :	0.996	(59742/60000)		Train loss :	0.0206
Val accuracy   :	0.98	(9796/10000)		Val loss :	0.0863


Mean log L2 = -5.842872142791748

Epoch 22 in 131.77 sec
Train accuracy :	0.996	(59755/60000)		Train loss :	0.018
Val accuracy   :	0.978	(9783/10000)		Val loss :	0.0903


Mean log L2 = -5.833004951477051

Epoch 23 in 131.51 sec
Train accuracy :	0.993	(59609/60000)		Train loss :	0.0272
Val accuracy   :	0.974	(9742/10000)		Val loss :	0.1047


Mean log L2 = -5.875767707824707

Epoch 24 in 131.73 sec
Train accuracy :	0.995	(59673/60000)		Train loss :	0.0245
Val accuracy   :	0.977	(9773/10000)		Val loss :	0.1024


Mean log L2 = -5.838552951812744

Epoch 25 in 131.63 sec
Train accuracy :	0.996	(59777/60000)		Train loss :	0.0172
Val accuracy   :	0.979	(9788/10000)		Val loss :	0.0884


Mean log L2 = -5.843285083770752

Epoch 26 in 131.95 sec
Train accuracy :	0.995	(59676/60000)		Train loss :	0.0221
Val accuracy   :	0.978	(9781/10000)		Val loss :	0.0961


Mean log L2 = -5.849590301513672

Epoch 27 in 131.43 sec
Train accuracy :	0.994	(59611/60000)		Train loss :	0.0287
Val accuracy   :	0.975	(9752/10000)		Val loss :	0.104


Mean log L2 = -5.84744930267334

Epoch 28 in 131.72 sec
Train accuracy :	0.996	(59768/60000)		Train loss :	0.0174
Val accuracy   :	0.976	(9758/10000)		Val loss :	0.1009


Mean log L2 = -5.848086833953857

Epoch 29 in 131.66 sec
Train accuracy :	0.994	(59630/60000)		Train loss :	0.027
Val accuracy   :	0.975	(9751/10000)		Val loss :	0.1035


Mean log L2 = -5.850411415100098

Epoch 30 in 131.53 sec
Train accuracy :	0.996	(59780/60000)		Train loss :	0.0171
Val accuracy   :	0.976	(9761/10000)		Val loss :	0.1078


Mean log L2 = -5.8387956619262695

Epoch 31 in 131.67 sec
Train accuracy :	0.996	(59780/60000)		Train loss :	0.0162
Val accuracy   :	0.977	(9773/10000)		Val loss :	0.0927


Mean log L2 = -5.840888023376465

Epoch 32 in 131.70 sec
Train accuracy :	0.997	(59831/60000)		Train loss :	0.015
Val accuracy   :	0.977	(9768/10000)		Val loss :	0.0963


Mean log L2 = -5.786750793457031

Epoch 33 in 131.90 sec
Train accuracy :	0.996	(59762/60000)		Train loss :	0.0185
Val accuracy   :	0.977	(9769/10000)		Val loss :	0.0954


Mean log L2 = -5.857292652130127

Epoch 34 in 131.38 sec
Train accuracy :	0.994	(59638/60000)		Train loss :	0.0251
Val accuracy   :	0.974	(9741/10000)		Val loss :	0.1058


Mean log L2 = -5.84236478805542

Epoch 35 in 131.99 sec
Train accuracy :	0.996	(59763/60000)		Train loss :	0.0183
Val accuracy   :	0.975	(9747/10000)		Val loss :	0.1072


Mean log L2 = -5.849844455718994

Epoch 36 in 134.10 sec
Train accuracy :	0.994	(59628/60000)		Train loss :	0.028
Val accuracy   :	0.975	(9749/10000)		Val loss :	0.103


Mean log L2 = -5.853583335876465

Epoch 37 in 132.02 sec
Train accuracy :	0.997	(59798/60000)		Train loss :	0.0163
Val accuracy   :	0.977	(9767/10000)		Val loss :	0.1023


Mean log L2 = -5.853034496307373

Epoch 38 in 131.55 sec
Train accuracy :	0.996	(59788/60000)		Train loss :	0.0165
Val accuracy   :	0.976	(9757/10000)		Val loss :	0.1056


Mean log L2 = -5.855602741241455

Epoch 39 in 131.87 sec
Train accuracy :	0.997	(59848/60000)		Train loss :	0.0123
Val accuracy   :	0.978	(9779/10000)		Val loss :	0.0992


Mean log L2 = -5.849164009094238

Epoch 40 in 131.55 sec
Train accuracy :	0.997	(59827/60000)		Train loss :	0.0126
Val accuracy   :	0.978	(9782/10000)		Val loss :	0.0934


Mean log L2 = -5.807059288024902

Epoch 41 in 131.72 sec
Train accuracy :	0.997	(59813/60000)		Train loss :	0.0139
Val accuracy   :	0.98	(9795/10000)		Val loss :	0.0905


Mean log L2 = -5.840585231781006

Epoch 42 in 131.73 sec
Train accuracy :	0.996	(59775/60000)		Train loss :	0.0169
Val accuracy   :	0.975	(9752/10000)		Val loss :	0.1194


Mean log L2 = -5.839114665985107

Epoch 43 in 131.63 sec
Train accuracy :	0.997	(59791/60000)		Train loss :	0.0165
Val accuracy   :	0.977	(9774/10000)		Val loss :	0.1096


Mean log L2 = -5.857846260070801

Epoch 44 in 131.47 sec
Train accuracy :	0.998	(59868/60000)		Train loss :	0.0121
Val accuracy   :	0.979	(9794/10000)		Val loss :	0.0942


Mean log L2 = -5.839821815490723

Epoch 45 in 131.34 sec
Train accuracy :	0.998	(59872/60000)		Train loss :	0.0117
Val accuracy   :	0.976	(9761/10000)		Val loss :	0.1018


Mean log L2 = -5.855265140533447

Epoch 46 in 131.55 sec
Train accuracy :	0.998	(59875/60000)		Train loss :	0.0115
Val accuracy   :	0.978	(9775/10000)		Val loss :	0.0997


Mean log L2 = -5.846050262451172

Epoch 47 in 131.32 sec
Train accuracy :	0.998	(59906/60000)		Train loss :	0.0093
Val accuracy   :	0.979	(9785/10000)		Val loss :	0.097


Mean log L2 = -5.8504862785339355

Epoch 48 in 131.20 sec
Train accuracy :	0.997	(59841/60000)		Train loss :	0.0139
Val accuracy   :	0.979	(9787/10000)		Val loss :	0.0992


Mean log L2 = -5.850044250488281

Epoch 49 in 131.44 sec
Train accuracy :	0.997	(59834/60000)		Train loss :	0.0142
Val accuracy   :	0.977	(9768/10000)		Val loss :	0.0986


Mean log L2 = -5.8420233726501465

Epoch 50 in 131.28 sec
Train accuracy :	0.996	(59770/60000)		Train loss :	0.0183
Val accuracy   :	0.976	(9755/10000)		Val loss :	0.1099
