# Supplementary material
Source: ML conference proceedings conference paper supplement (https://proceedings.neurips.cc/paper_files/paper/2022/hash/545a114e655f9d25ba0d56ea9a01fc6e-Abstract.html)
Supplement: Supplementary file 1 [file 545a114e655f9d25ba0d56ea9a01fc6e-Supplemental-Conference.zip › revised_supplemental/code/results/table1/noise/hep/2022-05-18_19-59-40_xp_mlp_2h256_ep10_beta4e-1_noise4e-2_run2/log.txt]

python train.py simus/ep/mlp/mnist_runs/noise/hep_run2.json

Mean log L2 = -5.858560562133789

Epoch 1 in 4181.24 sec
Train accuracy :	0.938	(56300/60000)		Train loss :	0.2177
Val accuracy   :	0.934	(9336/10000)		Val loss :	0.229


Mean log L2 = -5.873534679412842

Epoch 2 in 163.72 sec
Train accuracy :	0.96	(57591/60000)		Train loss :	0.1449
Val accuracy   :	0.956	(9559/10000)		Val loss :	0.1638


Mean log L2 = -5.865621089935303

Epoch 3 in 165.84 sec
Train accuracy :	0.973	(58365/60000)		Train loss :	0.0991
Val accuracy   :	0.966	(9657/10000)		Val loss :	0.1251


Mean log L2 = -5.874539852142334

Epoch 4 in 166.01 sec
Train accuracy :	0.978	(58705/60000)		Train loss :	0.0826
Val accuracy   :	0.97	(9695/10000)		Val loss :	0.1142


Mean log L2 = -5.864810466766357

Epoch 5 in 166.40 sec
Train accuracy :	0.98	(58810/60000)		Train loss :	0.0739
Val accuracy   :	0.971	(9707/10000)		Val loss :	0.108


Mean log L2 = -5.8583478927612305

Epoch 6 in 201.93 sec
Train accuracy :	0.983	(58993/60000)		Train loss :	0.0634
Val accuracy   :	0.971	(9709/10000)		Val loss :	0.106


Mean log L2 = -5.854170322418213

Epoch 7 in 159.42 sec
Train accuracy :	0.983	(59005/60000)		Train loss :	0.062
Val accuracy   :	0.973	(9728/10000)		Val loss :	0.0979


Mean log L2 = -5.824845790863037

Epoch 8 in 167.25 sec
Train accuracy :	0.988	(59276/60000)		Train loss :	0.0464
Val accuracy   :	0.976	(9761/10000)		Val loss :	0.0869


Mean log L2 = -5.881881237030029

Epoch 9 in 166.01 sec
Train accuracy :	0.988	(59255/60000)		Train loss :	0.0494
Val accuracy   :	0.975	(9751/10000)		Val loss :	0.0918


Mean log L2 = -5.850184917449951

Epoch 10 in 165.99 sec
Train accuracy :	0.988	(59293/60000)		Train loss :	0.0441
Val accuracy   :	0.974	(9744/10000)		Val loss :	0.091


Mean log L2 = -5.862922191619873

Epoch 11 in 167.77 sec
Train accuracy :	0.992	(59515/60000)		Train loss :	0.0329
Val accuracy   :	0.978	(9778/10000)		Val loss :	0.0918


Mean log L2 = -5.85045862197876

Epoch 12 in 161.64 sec
Train accuracy :	0.991	(59484/60000)		Train loss :	0.0334
Val accuracy   :	0.978	(9777/10000)		Val loss :	0.0913


Mean log L2 = -5.869117736816406

Epoch 13 in 167.83 sec
Train accuracy :	0.994	(59616/60000)		Train loss :	0.0283
Val accuracy   :	0.978	(9781/10000)		Val loss :	0.0862


Mean log L2 = -5.77488374710083

Epoch 14 in 168.09 sec
Train accuracy :	0.992	(59512/60000)		Train loss :	0.0329
Val accuracy   :	0.977	(9770/10000)		Val loss :	0.0925


Mean log L2 = -5.843408107757568

Epoch 15 in 168.92 sec
Train accuracy :	0.993	(59572/60000)		Train loss :	0.0304
Val accuracy   :	0.976	(9757/10000)		Val loss :	0.0963


Mean log L2 = -5.858439922332764

Epoch 16 in 167.85 sec
Train accuracy :	0.995	(59670/60000)		Train loss :	0.0248
Val accuracy   :	0.976	(9763/10000)		Val loss :	0.0961


Mean log L2 = -5.867477893829346

Epoch 17 in 170.01 sec
Train accuracy :	0.995	(59696/60000)		Train loss :	0.0234
Val accuracy   :	0.978	(9777/10000)		Val loss :	0.09


Mean log L2 = -5.864928722381592

Epoch 18 in 168.56 sec
Train accuracy :	0.995	(59710/60000)		Train loss :	0.0229
Val accuracy   :	0.978	(9784/10000)		Val loss :	0.0884


Mean log L2 = -5.856145858764648

Epoch 19 in 169.35 sec
Train accuracy :	0.994	(59666/60000)		Train loss :	0.0224
Val accuracy   :	0.978	(9777/10000)		Val loss :	0.0939


Mean log L2 = -5.850929260253906

Epoch 20 in 165.27 sec
Train accuracy :	0.997	(59825/60000)		Train loss :	0.0152
Val accuracy   :	0.98	(9804/10000)		Val loss :	0.086


Mean log L2 = -5.862363338470459

Epoch 21 in 167.04 sec
Train accuracy :	0.996	(59743/60000)		Train loss :	0.0193
Val accuracy   :	0.978	(9782/10000)		Val loss :	0.0938


Mean log L2 = -5.863731861114502

Epoch 22 in 170.27 sec
Train accuracy :	0.995	(59679/60000)		Train loss :	0.0236
Val accuracy   :	0.978	(9779/10000)		Val loss :	0.0989


Mean log L2 = -5.8581342697143555

Epoch 23 in 169.42 sec
Train accuracy :	0.995	(59716/60000)		Train loss :	0.021
Val accuracy   :	0.978	(9781/10000)		Val loss :	0.0942


Mean log L2 = -5.827079772949219

Epoch 24 in 170.12 sec
Train accuracy :	0.997	(59806/60000)		Train loss :	0.0156
Val accuracy   :	0.978	(9782/10000)		Val loss :	0.0989


Mean log L2 = -5.746267318725586

Epoch 25 in 169.59 sec
Train accuracy :	0.996	(59754/60000)		Train loss :	0.0192
Val accuracy   :	0.978	(9780/10000)		Val loss :	0.0938


Mean log L2 = -5.742745399475098

Epoch 26 in 170.78 sec
Train accuracy :	0.997	(59791/60000)		Train loss :	0.0168
Val accuracy   :	0.979	(9789/10000)		Val loss :	0.0951


Mean log L2 = -5.8465189933776855

Epoch 27 in 159.69 sec
Train accuracy :	0.996	(59774/60000)		Train loss :	0.0166
Val accuracy   :	0.979	(9793/10000)		Val loss :	0.0964


Mean log L2 = -5.815985679626465

Epoch 28 in 169.34 sec
Train accuracy :	0.995	(59692/60000)		Train loss :	0.0223
Val accuracy   :	0.977	(9772/10000)		Val loss :	0.0974


Mean log L2 = -5.85333776473999

Epoch 29 in 201.94 sec
Train accuracy :	0.997	(59839/60000)		Train loss :	0.0139
Val accuracy   :	0.979	(9786/10000)		Val loss :	0.1004


Mean log L2 = -5.790656566619873

Epoch 30 in 169.73 sec
Train accuracy :	0.995	(59725/60000)		Train loss :	0.0207
Val accuracy   :	0.977	(9769/10000)		Val loss :	0.1119


Mean log L2 = -5.849025726318359

Epoch 31 in 169.17 sec
Train accuracy :	0.997	(59816/60000)		Train loss :	0.0155
Val accuracy   :	0.978	(9777/10000)		Val loss :	0.0997


Mean log L2 = -5.862084865570068

Epoch 32 in 169.38 sec
Train accuracy :	0.996	(59767/60000)		Train loss :	0.0176
Val accuracy   :	0.977	(9772/10000)		Val loss :	0.0976


Mean log L2 = -5.843649387359619

Epoch 33 in 169.47 sec
Train accuracy :	0.998	(59856/60000)		Train loss :	0.013
Val accuracy   :	0.978	(9775/10000)		Val loss :	0.1021


Mean log L2 = -5.851895809173584

Epoch 34 in 170.50 sec
Train accuracy :	0.995	(59706/60000)		Train loss :	0.0215
Val accuracy   :	0.976	(9761/10000)		Val loss :	0.1114


Mean log L2 = -5.86349630355835

Epoch 35 in 169.77 sec
Train accuracy :	0.998	(59858/60000)		Train loss :	0.0127
Val accuracy   :	0.978	(9776/10000)		Val loss :	0.1031


Mean log L2 = -5.850278854370117

Epoch 36 in 170.43 sec
Train accuracy :	0.997	(59798/60000)		Train loss :	0.0166
Val accuracy   :	0.978	(9783/10000)		Val loss :	0.1006


Mean log L2 = -5.864071846008301

Epoch 37 in 168.54 sec
Train accuracy :	0.997	(59835/60000)		Train loss :	0.0133
Val accuracy   :	0.979	(9792/10000)		Val loss :	0.0966


Mean log L2 = -5.851566314697266

Epoch 38 in 170.25 sec
Train accuracy :	0.996	(59780/60000)		Train loss :	0.0179
Val accuracy   :	0.978	(9777/10000)		Val loss :	0.0995


Mean log L2 = -5.857059478759766

Epoch 39 in 168.19 sec
Train accuracy :	0.998	(59870/60000)		Train loss :	0.0113
Val accuracy   :	0.98	(9798/10000)		Val loss :	0.089


Mean log L2 = -5.846797466278076

Epoch 40 in 168.58 sec
Train accuracy :	0.996	(59734/60000)		Train loss :	0.0207
Val accuracy   :	0.974	(9740/10000)		Val loss :	0.1085


Mean log L2 = -5.851464748382568

Epoch 41 in 156.20 sec
Train accuracy :	0.998	(59884/60000)		Train loss :	0.011
Val accuracy   :	0.978	(9778/10000)		Val loss :	0.1022


Mean log L2 = -5.742845058441162

Epoch 42 in 165.16 sec
Train accuracy :	0.997	(59829/60000)		Train loss :	0.0148
Val accuracy   :	0.977	(9773/10000)		Val loss :	0.1096


Mean log L2 = -5.865422248840332

Epoch 43 in 167.31 sec
Train accuracy :	0.998	(59874/60000)		Train loss :	0.0107
Val accuracy   :	0.979	(9790/10000)		Val loss :	0.1024


Mean log L2 = -5.838619709014893

Epoch 44 in 161.45 sec
Train accuracy :	0.996	(59770/60000)		Train loss :	0.0195
Val accuracy   :	0.975	(9754/10000)		Val loss :	0.1112


Mean log L2 = -5.857867240905762

Epoch 45 in 168.49 sec
Train accuracy :	0.997	(59836/60000)		Train loss :	0.0148
Val accuracy   :	0.979	(9785/10000)		Val loss :	0.0986


Mean log L2 = -5.8090715408325195

Epoch 46 in 170.85 sec
Train accuracy :	0.998	(59856/60000)		Train loss :	0.0127
Val accuracy   :	0.978	(9778/10000)		Val loss :	0.0997


Mean log L2 = -5.848110198974609

Epoch 47 in 169.37 sec
Train accuracy :	0.998	(59877/60000)		Train loss :	0.0119
Val accuracy   :	0.978	(9776/10000)		Val loss :	0.1083


Mean log L2 = -5.838451862335205

Epoch 48 in 167.02 sec
Train accuracy :	0.998	(59896/60000)		Train loss :	0.0101
Val accuracy   :	0.979	(9789/10000)		Val loss :	0.0932


Mean log L2 = -5.860992908477783

Epoch 49 in 170.18 sec
Train accuracy :	0.999	(59939/60000)		Train loss :	0.0077
Val accuracy   :	0.98	(9803/10000)		Val loss :	0.0945


Mean log L2 = -5.824076175689697

Epoch 50 in 168.75 sec
Train accuracy :	0.997	(59823/60000)		Train loss :	0.0148
Val accuracy   :	0.977	(9774/10000)		Val loss :	0.1078
