# Supplementary material
Source: ML conference proceedings conference paper supplement (https://proceedings.neurips.cc/paper_files/paper/2022/hash/545a114e655f9d25ba0d56ea9a01fc6e-Abstract.html)
Supplement: Supplementary file 1 [file 545a114e655f9d25ba0d56ea9a01fc6e-Supplemental-Conference.zip › revised_supplemental/code/results/table2/bp_cif10/2022-05-09_15-23-10_xvgg4_bp_cif10_soft_relu_run2/log.txt]

python train.py simus/bp/cnn/xvgg4_cif10.json


Epoch 1 in 12.77 sec
Train accuracy :	0.382	(19109/50000)		Train loss :	1.6801
Val accuracy   :	0.51	(5102/10000)		Val loss :	1.361
Top-5 val acc  :	0.929	(9287/10000)


Epoch 2 in 8.14 sec
Train accuracy :	0.534	(26716/50000)		Train loss :	1.3053
Val accuracy   :	0.562	(5616/10000)		Val loss :	1.2186
Top-5 val acc  :	0.949	(9487/10000)


Epoch 3 in 7.94 sec
Train accuracy :	0.595	(29736/50000)		Train loss :	1.1675
Val accuracy   :	0.612	(6121/10000)		Val loss :	1.1262
Top-5 val acc  :	0.955	(9554/10000)


Epoch 4 in 8.10 sec
Train accuracy :	0.62	(30998/50000)		Train loss :	1.1047
Val accuracy   :	0.629	(6293/10000)		Val loss :	1.0658
Top-5 val acc  :	0.959	(9587/10000)


Epoch 5 in 7.94 sec
Train accuracy :	0.636	(31821/50000)		Train loss :	1.0758
Val accuracy   :	0.655	(6552/10000)		Val loss :	1.008
Top-5 val acc  :	0.963	(9626/10000)


Epoch 6 in 8.12 sec
Train accuracy :	0.638	(31885/50000)		Train loss :	1.0598
Val accuracy   :	0.668	(6683/10000)		Val loss :	0.9947
Top-5 val acc  :	0.966	(9657/10000)


Epoch 7 in 7.94 sec
Train accuracy :	0.65	(32507/50000)		Train loss :	1.033
Val accuracy   :	0.659	(6593/10000)		Val loss :	1.0406
Top-5 val acc  :	0.959	(9585/10000)


Epoch 8 in 8.03 sec
Train accuracy :	0.654	(32720/50000)		Train loss :	1.0345
Val accuracy   :	0.654	(6541/10000)		Val loss :	1.0667
Top-5 val acc  :	0.958	(9577/10000)


Epoch 9 in 7.97 sec
Train accuracy :	0.655	(32774/50000)		Train loss :	1.029
Val accuracy   :	0.662	(6619/10000)		Val loss :	1.0299
Top-5 val acc  :	0.959	(9587/10000)


Epoch 10 in 8.04 sec
Train accuracy :	0.666	(33288/50000)		Train loss :	1.0042
Val accuracy   :	0.656	(6558/10000)		Val loss :	1.0417
Top-5 val acc  :	0.962	(9617/10000)


Epoch 11 in 7.96 sec
Train accuracy :	0.671	(33557/50000)		Train loss :	0.9843
Val accuracy   :	0.66	(6596/10000)		Val loss :	1.0921
Top-5 val acc  :	0.955	(9553/10000)


Epoch 12 in 8.20 sec
Train accuracy :	0.668	(33408/50000)		Train loss :	0.9929
Val accuracy   :	0.686	(6864/10000)		Val loss :	0.9324
Top-5 val acc  :	0.967	(9667/10000)


Epoch 13 in 7.91 sec
Train accuracy :	0.672	(33608/50000)		Train loss :	0.9812
Val accuracy   :	0.67	(6701/10000)		Val loss :	1.0575
Top-5 val acc  :	0.96	(9597/10000)


Epoch 14 in 8.06 sec
Train accuracy :	0.676	(33791/50000)		Train loss :	0.974
Val accuracy   :	0.687	(6866/10000)		Val loss :	1.0084
Top-5 val acc  :	0.96	(9596/10000)


Epoch 15 in 7.87 sec
Train accuracy :	0.683	(34138/50000)		Train loss :	0.9563
Val accuracy   :	0.697	(6971/10000)		Val loss :	1.0056
Top-5 val acc  :	0.97	(9700/10000)


Epoch 16 in 8.11 sec
Train accuracy :	0.692	(34601/50000)		Train loss :	0.9333
Val accuracy   :	0.693	(6926/10000)		Val loss :	0.951
Top-5 val acc  :	0.966	(9658/10000)


Epoch 17 in 7.86 sec
Train accuracy :	0.693	(34652/50000)		Train loss :	0.9277
Val accuracy   :	0.701	(7005/10000)		Val loss :	0.9215
Top-5 val acc  :	0.967	(9666/10000)


Epoch 18 in 8.06 sec
Train accuracy :	0.7	(34986/50000)		Train loss :	0.9082
Val accuracy   :	0.707	(7065/10000)		Val loss :	0.9107
Top-5 val acc  :	0.971	(9708/10000)


Epoch 19 in 8.00 sec
Train accuracy :	0.702	(35118/50000)		Train loss :	0.9019
Val accuracy   :	0.706	(7058/10000)		Val loss :	0.9652
Top-5 val acc  :	0.969	(9690/10000)


Epoch 20 in 8.13 sec
Train accuracy :	0.704	(35224/50000)		Train loss :	0.896
Val accuracy   :	0.723	(7229/10000)		Val loss :	0.8847
Top-5 val acc  :	0.97	(9695/10000)


Epoch 21 in 8.38 sec
Train accuracy :	0.715	(35746/50000)		Train loss :	0.8671
Val accuracy   :	0.713	(7127/10000)		Val loss :	0.9195
Top-5 val acc  :	0.967	(9669/10000)


Epoch 22 in 8.03 sec
Train accuracy :	0.728	(36412/50000)		Train loss :	0.8239
Val accuracy   :	0.726	(7259/10000)		Val loss :	0.9055
Top-5 val acc  :	0.97	(9703/10000)


Epoch 23 in 8.29 sec
Train accuracy :	0.719	(35958/50000)		Train loss :	0.852
Val accuracy   :	0.725	(7247/10000)		Val loss :	0.8659
Top-5 val acc  :	0.972	(9717/10000)


Epoch 24 in 8.10 sec
Train accuracy :	0.735	(36765/50000)		Train loss :	0.8005
Val accuracy   :	0.728	(7283/10000)		Val loss :	0.8937
Top-5 val acc  :	0.975	(9748/10000)


Epoch 25 in 8.00 sec
Train accuracy :	0.744	(37192/50000)		Train loss :	0.7787
Val accuracy   :	0.744	(7443/10000)		Val loss :	0.8357
Top-5 val acc  :	0.974	(9742/10000)


Epoch 26 in 8.02 sec
Train accuracy :	0.745	(37226/50000)		Train loss :	0.7696
Val accuracy   :	0.729	(7291/10000)		Val loss :	0.8871
Top-5 val acc  :	0.973	(9726/10000)


Epoch 27 in 8.10 sec
Train accuracy :	0.751	(37537/50000)		Train loss :	0.7548
Val accuracy   :	0.742	(7416/10000)		Val loss :	0.7994
Top-5 val acc  :	0.974	(9742/10000)


Epoch 28 in 8.03 sec
Train accuracy :	0.756	(37787/50000)		Train loss :	0.7373
Val accuracy   :	0.751	(7509/10000)		Val loss :	0.8001
Top-5 val acc  :	0.975	(9749/10000)


Epoch 29 in 7.92 sec
Train accuracy :	0.766	(38287/50000)		Train loss :	0.7052
Val accuracy   :	0.744	(7441/10000)		Val loss :	0.8126
Top-5 val acc  :	0.974	(9742/10000)


Epoch 30 in 8.21 sec
Train accuracy :	0.773	(38665/50000)		Train loss :	0.6911
Val accuracy   :	0.745	(7453/10000)		Val loss :	0.8159
Top-5 val acc  :	0.978	(9775/10000)


Epoch 31 in 8.23 sec
Train accuracy :	0.778	(38902/50000)		Train loss :	0.6705
Val accuracy   :	0.775	(7751/10000)		Val loss :	0.7522
Top-5 val acc  :	0.981	(9813/10000)


Epoch 32 in 7.97 sec
Train accuracy :	0.79	(39490/50000)		Train loss :	0.6371
Val accuracy   :	0.771	(7709/10000)		Val loss :	0.7518
Top-5 val acc  :	0.983	(9833/10000)


Epoch 33 in 7.98 sec
Train accuracy :	0.793	(39664/50000)		Train loss :	0.6225
Val accuracy   :	0.768	(7677/10000)		Val loss :	0.7192
Top-5 val acc  :	0.978	(9778/10000)


Epoch 34 in 7.98 sec
Train accuracy :	0.798	(39879/50000)		Train loss :	0.6106
Val accuracy   :	0.769	(7695/10000)		Val loss :	0.7522
Top-5 val acc  :	0.982	(9816/10000)


Epoch 35 in 7.96 sec
Train accuracy :	0.804	(40211/50000)		Train loss :	0.59
Val accuracy   :	0.793	(7934/10000)		Val loss :	0.6833
Top-5 val acc  :	0.983	(9831/10000)


Epoch 36 in 7.87 sec
Train accuracy :	0.809	(40435/50000)		Train loss :	0.5732
Val accuracy   :	0.785	(7851/10000)		Val loss :	0.74
Top-5 val acc  :	0.98	(9803/10000)


Epoch 37 in 8.13 sec
Train accuracy :	0.813	(40648/50000)		Train loss :	0.5553
Val accuracy   :	0.788	(7882/10000)		Val loss :	0.6887
Top-5 val acc  :	0.982	(9824/10000)


Epoch 38 in 7.97 sec
Train accuracy :	0.828	(41414/50000)		Train loss :	0.5149
Val accuracy   :	0.791	(7914/10000)		Val loss :	0.6926
Top-5 val acc  :	0.984	(9838/10000)


Epoch 39 in 7.86 sec
Train accuracy :	0.833	(41655/50000)		Train loss :	0.5013
Val accuracy   :	0.791	(7915/10000)		Val loss :	0.6647
Top-5 val acc  :	0.983	(9827/10000)


Epoch 40 in 7.90 sec
Train accuracy :	0.837	(41840/50000)		Train loss :	0.4876
Val accuracy   :	0.801	(8015/10000)		Val loss :	0.6651
Top-5 val acc  :	0.988	(9880/10000)


Epoch 41 in 7.89 sec
Train accuracy :	0.843	(42127/50000)		Train loss :	0.4728
Val accuracy   :	0.817	(8173/10000)		Val loss :	0.6051
Top-5 val acc  :	0.988	(9880/10000)


Epoch 42 in 7.86 sec
Train accuracy :	0.852	(42606/50000)		Train loss :	0.4386
Val accuracy   :	0.81	(8100/10000)		Val loss :	0.6229
Top-5 val acc  :	0.986	(9864/10000)


Epoch 43 in 7.86 sec
Train accuracy :	0.853	(42670/50000)		Train loss :	0.438
Val accuracy   :	0.803	(8026/10000)		Val loss :	0.6345
Top-5 val acc  :	0.984	(9841/10000)


Epoch 44 in 8.07 sec
Train accuracy :	0.863	(43140/50000)		Train loss :	0.4094
Val accuracy   :	0.818	(8181/10000)		Val loss :	0.5828
Top-5 val acc  :	0.986	(9858/10000)


Epoch 45 in 8.01 sec
Train accuracy :	0.873	(43651/50000)		Train loss :	0.3741
Val accuracy   :	0.818	(8180/10000)		Val loss :	0.6151
Top-5 val acc  :	0.987	(9867/10000)


Epoch 46 in 7.96 sec
Train accuracy :	0.877	(43853/50000)		Train loss :	0.3578
Val accuracy   :	0.82	(8201/10000)		Val loss :	0.5977
Top-5 val acc  :	0.988	(9875/10000)


Epoch 47 in 7.97 sec
Train accuracy :	0.883	(44146/50000)		Train loss :	0.3452
Val accuracy   :	0.819	(8193/10000)		Val loss :	0.6079
Top-5 val acc  :	0.988	(9875/10000)


Epoch 48 in 8.00 sec
Train accuracy :	0.887	(44336/50000)		Train loss :	0.3306
Val accuracy   :	0.821	(8208/10000)		Val loss :	0.5969
Top-5 val acc  :	0.989	(9889/10000)


Epoch 49 in 7.97 sec
Train accuracy :	0.895	(44750/50000)		Train loss :	0.3074
Val accuracy   :	0.821	(8205/10000)		Val loss :	0.6012
Top-5 val acc  :	0.988	(9884/10000)


Epoch 50 in 7.95 sec
Train accuracy :	0.898	(44920/50000)		Train loss :	0.2953
Val accuracy   :	0.838	(8384/10000)		Val loss :	0.5619
Top-5 val acc  :	0.99	(9898/10000)


Epoch 51 in 7.93 sec
Train accuracy :	0.911	(45543/50000)		Train loss :	0.2629
Val accuracy   :	0.834	(8338/10000)		Val loss :	0.5535
Top-5 val acc  :	0.99	(9901/10000)


Epoch 52 in 8.02 sec
Train accuracy :	0.913	(45639/50000)		Train loss :	0.2537
Val accuracy   :	0.84	(8395/10000)		Val loss :	0.5566
Top-5 val acc  :	0.991	(9909/10000)


Epoch 53 in 7.97 sec
Train accuracy :	0.918	(45921/50000)		Train loss :	0.2383
Val accuracy   :	0.835	(8354/10000)		Val loss :	0.5916
Top-5 val acc  :	0.989	(9892/10000)


Epoch 54 in 7.97 sec
Train accuracy :	0.927	(46334/50000)		Train loss :	0.2138
Val accuracy   :	0.838	(8384/10000)		Val loss :	0.5742
Top-5 val acc  :	0.992	(9918/10000)


Epoch 55 in 8.04 sec
Train accuracy :	0.932	(46604/50000)		Train loss :	0.1948
Val accuracy   :	0.848	(8481/10000)		Val loss :	0.5587
Top-5 val acc  :	0.992	(9920/10000)


Epoch 56 in 7.93 sec
Train accuracy :	0.934	(46706/50000)		Train loss :	0.1867
Val accuracy   :	0.847	(8467/10000)		Val loss :	0.5867
Top-5 val acc  :	0.99	(9902/10000)


Epoch 57 in 8.18 sec
Train accuracy :	0.941	(47041/50000)		Train loss :	0.1692
Val accuracy   :	0.852	(8524/10000)		Val loss :	0.5716
Top-5 val acc  :	0.992	(9920/10000)


Epoch 58 in 7.95 sec
Train accuracy :	0.947	(47365/50000)		Train loss :	0.1549
Val accuracy   :	0.845	(8447/10000)		Val loss :	0.5591
Top-5 val acc  :	0.992	(9924/10000)


Epoch 59 in 7.94 sec
Train accuracy :	0.951	(47542/50000)		Train loss :	0.1418
Val accuracy   :	0.853	(8527/10000)		Val loss :	0.5178
Top-5 val acc  :	0.992	(9915/10000)


Epoch 60 in 7.97 sec
Train accuracy :	0.957	(47849/50000)		Train loss :	0.1249
Val accuracy   :	0.856	(8558/10000)		Val loss :	0.5874
Top-5 val acc  :	0.992	(9922/10000)


Epoch 61 in 8.00 sec
Train accuracy :	0.961	(48056/50000)		Train loss :	0.1133
Val accuracy   :	0.859	(8590/10000)		Val loss :	0.5459
Top-5 val acc  :	0.993	(9930/10000)


Epoch 62 in 7.92 sec
Train accuracy :	0.966	(48283/50000)		Train loss :	0.1016
Val accuracy   :	0.858	(8579/10000)		Val loss :	0.5466
Top-5 val acc  :	0.992	(9917/10000)


Epoch 63 in 7.95 sec
Train accuracy :	0.968	(48408/50000)		Train loss :	0.0923
Val accuracy   :	0.865	(8647/10000)		Val loss :	0.543
Top-5 val acc  :	0.992	(9916/10000)


Epoch 64 in 7.92 sec
Train accuracy :	0.972	(48594/50000)		Train loss :	0.0826
Val accuracy   :	0.867	(8665/10000)		Val loss :	0.5366
Top-5 val acc  :	0.992	(9922/10000)


Epoch 65 in 8.15 sec
Train accuracy :	0.975	(48730/50000)		Train loss :	0.074
Val accuracy   :	0.862	(8624/10000)		Val loss :	0.5598
Top-5 val acc  :	0.993	(9928/10000)


Epoch 66 in 7.93 sec
Train accuracy :	0.977	(48869/50000)		Train loss :	0.066
Val accuracy   :	0.868	(8680/10000)		Val loss :	0.5549
Top-5 val acc  :	0.993	(9932/10000)


Epoch 67 in 8.08 sec
Train accuracy :	0.98	(49010/50000)		Train loss :	0.0594
Val accuracy   :	0.873	(8730/10000)		Val loss :	0.5498
Top-5 val acc  :	0.994	(9935/10000)


Epoch 68 in 7.90 sec
Train accuracy :	0.982	(49110/50000)		Train loss :	0.0531
Val accuracy   :	0.869	(8694/10000)		Val loss :	0.5488
Top-5 val acc  :	0.994	(9937/10000)


Epoch 69 in 7.96 sec
Train accuracy :	0.986	(49286/50000)		Train loss :	0.0462
Val accuracy   :	0.87	(8703/10000)		Val loss :	0.5311
Top-5 val acc  :	0.993	(9931/10000)


Epoch 70 in 8.02 sec
Train accuracy :	0.987	(49353/50000)		Train loss :	0.0402
Val accuracy   :	0.869	(8689/10000)		Val loss :	0.5458
Top-5 val acc  :	0.994	(9938/10000)


Epoch 71 in 7.94 sec
Train accuracy :	0.989	(49448/50000)		Train loss :	0.0361
Val accuracy   :	0.875	(8751/10000)		Val loss :	0.5395
Top-5 val acc  :	0.994	(9939/10000)


Epoch 72 in 8.01 sec
Train accuracy :	0.99	(49518/50000)		Train loss :	0.0307
Val accuracy   :	0.878	(8785/10000)		Val loss :	0.5393
Top-5 val acc  :	0.993	(9934/10000)


Epoch 73 in 7.98 sec
Train accuracy :	0.992	(49575/50000)		Train loss :	0.0277
Val accuracy   :	0.877	(8768/10000)		Val loss :	0.5338
Top-5 val acc  :	0.994	(9936/10000)


Epoch 74 in 8.01 sec
Train accuracy :	0.992	(49621/50000)		Train loss :	0.0257
Val accuracy   :	0.879	(8789/10000)		Val loss :	0.5376
Top-5 val acc  :	0.994	(9936/10000)


Epoch 75 in 8.03 sec
Train accuracy :	0.994	(49681/50000)		Train loss :	0.0226
Val accuracy   :	0.883	(8834/10000)		Val loss :	0.5385
Top-5 val acc  :	0.994	(9944/10000)


Epoch 76 in 8.02 sec
Train accuracy :	0.994	(49687/50000)		Train loss :	0.0216
Val accuracy   :	0.883	(8832/10000)		Val loss :	0.5369
Top-5 val acc  :	0.994	(9935/10000)


Epoch 77 in 8.00 sec
Train accuracy :	0.995	(49760/50000)		Train loss :	0.0192
Val accuracy   :	0.882	(8819/10000)		Val loss :	0.5323
Top-5 val acc  :	0.994	(9941/10000)


Epoch 78 in 7.90 sec
Train accuracy :	0.996	(49779/50000)		Train loss :	0.0174
Val accuracy   :	0.881	(8808/10000)		Val loss :	0.5267
Top-5 val acc  :	0.994	(9941/10000)


Epoch 79 in 8.01 sec
Train accuracy :	0.996	(49784/50000)		Train loss :	0.0165
Val accuracy   :	0.883	(8834/10000)		Val loss :	0.528
Top-5 val acc  :	0.994	(9938/10000)


Epoch 80 in 7.95 sec
Train accuracy :	0.997	(49826/50000)		Train loss :	0.0153
Val accuracy   :	0.882	(8819/10000)		Val loss :	0.5341
Top-5 val acc  :	0.994	(9935/10000)


Epoch 81 in 7.94 sec
Train accuracy :	0.997	(49850/50000)		Train loss :	0.0136
Val accuracy   :	0.884	(8837/10000)		Val loss :	0.5304
Top-5 val acc  :	0.994	(9941/10000)


Epoch 82 in 7.99 sec
Train accuracy :	0.997	(49832/50000)		Train loss :	0.0148
Val accuracy   :	0.883	(8833/10000)		Val loss :	0.5319
Top-5 val acc  :	0.994	(9942/10000)


Epoch 83 in 8.04 sec
Train accuracy :	0.997	(49845/50000)		Train loss :	0.0139
Val accuracy   :	0.882	(8819/10000)		Val loss :	0.5267
Top-5 val acc  :	0.994	(9941/10000)


Epoch 84 in 7.99 sec
Train accuracy :	0.997	(49851/50000)		Train loss :	0.0139
Val accuracy   :	0.883	(8827/10000)		Val loss :	0.5315
Top-5 val acc  :	0.994	(9941/10000)


Epoch 85 in 8.11 sec
Train accuracy :	0.997	(49865/50000)		Train loss :	0.0126
Val accuracy   :	0.882	(8822/10000)		Val loss :	0.532
Top-5 val acc  :	0.994	(9943/10000)


Epoch 86 in 7.90 sec
Train accuracy :	0.997	(49862/50000)		Train loss :	0.0126
Val accuracy   :	0.883	(8835/10000)		Val loss :	0.5315
Top-5 val acc  :	0.994	(9942/10000)


Epoch 87 in 8.01 sec
Train accuracy :	0.998	(49878/50000)		Train loss :	0.0122
Val accuracy   :	0.883	(8829/10000)		Val loss :	0.5321
Top-5 val acc  :	0.994	(9942/10000)


Epoch 88 in 8.09 sec
Train accuracy :	0.998	(49889/50000)		Train loss :	0.0116
Val accuracy   :	0.883	(8831/10000)		Val loss :	0.5324
Top-5 val acc  :	0.994	(9943/10000)


Epoch 89 in 8.23 sec
Train accuracy :	0.998	(49877/50000)		Train loss :	0.0118
Val accuracy   :	0.883	(8829/10000)		Val loss :	0.5338
Top-5 val acc  :	0.994	(9943/10000)


Epoch 90 in 8.02 sec
Train accuracy :	0.998	(49879/50000)		Train loss :	0.0121
Val accuracy   :	0.883	(8835/10000)		Val loss :	0.5336
Top-5 val acc  :	0.994	(9943/10000)
