# Supplementary material
Source: ML conference proceedings conference paper supplement (https://proceedings.neurips.cc/paper_files/paper/2022/hash/545a114e655f9d25ba0d56ea9a01fc6e-Abstract.html)
Supplement: Supplementary file 1 [file 545a114e655f9d25ba0d56ea9a01fc6e-Supplemental-Conference.zip › revised_supplemental/code/results/table2/bp_cif10/2022-05-09_15-36-50_xvgg4_bp_cif10_soft_relu_run3/log.txt]

python train.py simus/bp/cnn/xvgg4_cif10.json


Epoch 1 in 12.81 sec
Train accuracy :	0.39	(19492/50000)		Train loss :	1.6631
Val accuracy   :	0.443	(4426/10000)		Val loss :	1.5082
Top-5 val acc  :	0.92	(9200/10000)


Epoch 2 in 8.01 sec
Train accuracy :	0.547	(27359/50000)		Train loss :	1.2829
Val accuracy   :	0.569	(5685/10000)		Val loss :	1.2129
Top-5 val acc  :	0.945	(9445/10000)


Epoch 3 in 7.85 sec
Train accuracy :	0.619	(30936/50000)		Train loss :	1.1045
Val accuracy   :	0.635	(6350/10000)		Val loss :	1.0728
Top-5 val acc  :	0.964	(9635/10000)


Epoch 4 in 8.04 sec
Train accuracy :	0.639	(31935/50000)		Train loss :	1.0504
Val accuracy   :	0.673	(6731/10000)		Val loss :	0.9745
Top-5 val acc  :	0.967	(9665/10000)


Epoch 5 in 7.91 sec
Train accuracy :	0.652	(32582/50000)		Train loss :	1.0207
Val accuracy   :	0.667	(6666/10000)		Val loss :	1.018
Top-5 val acc  :	0.965	(9650/10000)


Epoch 6 in 7.95 sec
Train accuracy :	0.65	(32521/50000)		Train loss :	1.0259
Val accuracy   :	0.672	(6720/10000)		Val loss :	0.9664
Top-5 val acc  :	0.965	(9646/10000)


Epoch 7 in 7.83 sec
Train accuracy :	0.663	(33139/50000)		Train loss :	0.999
Val accuracy   :	0.662	(6621/10000)		Val loss :	1.0494
Top-5 val acc  :	0.959	(9592/10000)


Epoch 8 in 7.90 sec
Train accuracy :	0.668	(33399/50000)		Train loss :	0.9862
Val accuracy   :	0.66	(6604/10000)		Val loss :	1.0749
Top-5 val acc  :	0.964	(9643/10000)


Epoch 9 in 8.11 sec
Train accuracy :	0.668	(33380/50000)		Train loss :	0.9973
Val accuracy   :	0.642	(6420/10000)		Val loss :	1.0575
Top-5 val acc  :	0.961	(9612/10000)


Epoch 10 in 8.04 sec
Train accuracy :	0.669	(33443/50000)		Train loss :	0.9894
Val accuracy   :	0.706	(7063/10000)		Val loss :	0.916
Top-5 val acc  :	0.968	(9676/10000)


Epoch 11 in 8.01 sec
Train accuracy :	0.671	(33561/50000)		Train loss :	0.9869
Val accuracy   :	0.703	(7034/10000)		Val loss :	0.9418
Top-5 val acc  :	0.969	(9693/10000)


Epoch 12 in 7.92 sec
Train accuracy :	0.675	(33748/50000)		Train loss :	0.9781
Val accuracy   :	0.685	(6854/10000)		Val loss :	1.0509
Top-5 val acc  :	0.966	(9655/10000)


Epoch 13 in 7.83 sec
Train accuracy :	0.679	(33956/50000)		Train loss :	0.9761
Val accuracy   :	0.684	(6838/10000)		Val loss :	0.9932
Top-5 val acc  :	0.963	(9630/10000)


Epoch 14 in 8.08 sec
Train accuracy :	0.692	(34594/50000)		Train loss :	0.9406
Val accuracy   :	0.674	(6740/10000)		Val loss :	1.0664
Top-5 val acc  :	0.962	(9616/10000)


Epoch 15 in 8.23 sec
Train accuracy :	0.692	(34585/50000)		Train loss :	0.9336
Val accuracy   :	0.691	(6906/10000)		Val loss :	0.9979
Top-5 val acc  :	0.966	(9662/10000)


Epoch 16 in 8.05 sec
Train accuracy :	0.691	(34537/50000)		Train loss :	0.9357
Val accuracy   :	0.698	(6978/10000)		Val loss :	0.9888
Top-5 val acc  :	0.965	(9646/10000)


Epoch 17 in 7.93 sec
Train accuracy :	0.7	(35012/50000)		Train loss :	0.9109
Val accuracy   :	0.707	(7066/10000)		Val loss :	0.9706
Top-5 val acc  :	0.97	(9695/10000)


Epoch 18 in 7.83 sec
Train accuracy :	0.706	(35307/50000)		Train loss :	0.8918
Val accuracy   :	0.713	(7133/10000)		Val loss :	0.8962
Top-5 val acc  :	0.972	(9715/10000)


Epoch 19 in 8.03 sec
Train accuracy :	0.711	(35554/50000)		Train loss :	0.8777
Val accuracy   :	0.705	(7048/10000)		Val loss :	0.9264
Top-5 val acc  :	0.963	(9630/10000)


Epoch 20 in 7.96 sec
Train accuracy :	0.715	(35739/50000)		Train loss :	0.8684
Val accuracy   :	0.692	(6916/10000)		Val loss :	0.9716
Top-5 val acc  :	0.966	(9660/10000)


Epoch 21 in 7.98 sec
Train accuracy :	0.722	(36092/50000)		Train loss :	0.8443
Val accuracy   :	0.703	(7034/10000)		Val loss :	0.9612
Top-5 val acc  :	0.965	(9645/10000)


Epoch 22 in 7.89 sec
Train accuracy :	0.731	(36530/50000)		Train loss :	0.8272
Val accuracy   :	0.721	(7210/10000)		Val loss :	0.8802
Top-5 val acc  :	0.972	(9715/10000)


Epoch 23 in 7.97 sec
Train accuracy :	0.729	(36450/50000)		Train loss :	0.8208
Val accuracy   :	0.692	(6922/10000)		Val loss :	0.9236
Top-5 val acc  :	0.961	(9611/10000)


Epoch 24 in 8.05 sec
Train accuracy :	0.742	(37088/50000)		Train loss :	0.7842
Val accuracy   :	0.728	(7284/10000)		Val loss :	0.9271
Top-5 val acc  :	0.973	(9734/10000)


Epoch 25 in 7.95 sec
Train accuracy :	0.744	(37217/50000)		Train loss :	0.7739
Val accuracy   :	0.745	(7448/10000)		Val loss :	0.8335
Top-5 val acc  :	0.977	(9769/10000)


Epoch 26 in 7.91 sec
Train accuracy :	0.75	(37497/50000)		Train loss :	0.7586
Val accuracy   :	0.744	(7440/10000)		Val loss :	0.8251
Top-5 val acc  :	0.977	(9767/10000)


Epoch 27 in 7.90 sec
Train accuracy :	0.755	(37732/50000)		Train loss :	0.7416
Val accuracy   :	0.744	(7437/10000)		Val loss :	0.8335
Top-5 val acc  :	0.973	(9728/10000)


Epoch 28 in 7.91 sec
Train accuracy :	0.759	(37963/50000)		Train loss :	0.7294
Val accuracy   :	0.731	(7311/10000)		Val loss :	0.8319
Top-5 val acc  :	0.976	(9761/10000)


Epoch 29 in 8.03 sec
Train accuracy :	0.767	(38329/50000)		Train loss :	0.7121
Val accuracy   :	0.765	(7653/10000)		Val loss :	0.7549
Top-5 val acc  :	0.98	(9795/10000)


Epoch 30 in 7.96 sec
Train accuracy :	0.774	(38698/50000)		Train loss :	0.6859
Val accuracy   :	0.766	(7661/10000)		Val loss :	0.748
Top-5 val acc  :	0.98	(9804/10000)


Epoch 31 in 7.89 sec
Train accuracy :	0.783	(39127/50000)		Train loss :	0.6587
Val accuracy   :	0.775	(7746/10000)		Val loss :	0.7157
Top-5 val acc  :	0.982	(9815/10000)


Epoch 32 in 7.93 sec
Train accuracy :	0.791	(39535/50000)		Train loss :	0.6314
Val accuracy   :	0.761	(7608/10000)		Val loss :	0.7427
Top-5 val acc  :	0.979	(9791/10000)


Epoch 33 in 7.91 sec
Train accuracy :	0.792	(39617/50000)		Train loss :	0.6272
Val accuracy   :	0.785	(7847/10000)		Val loss :	0.7228
Top-5 val acc  :	0.981	(9811/10000)


Epoch 34 in 8.05 sec
Train accuracy :	0.797	(39837/50000)		Train loss :	0.6109
Val accuracy   :	0.773	(7731/10000)		Val loss :	0.7327
Top-5 val acc  :	0.979	(9792/10000)


Epoch 35 in 8.01 sec
Train accuracy :	0.806	(40310/50000)		Train loss :	0.5837
Val accuracy   :	0.775	(7753/10000)		Val loss :	0.7042
Top-5 val acc  :	0.982	(9817/10000)


Epoch 36 in 7.99 sec
Train accuracy :	0.815	(40727/50000)		Train loss :	0.563
Val accuracy   :	0.787	(7873/10000)		Val loss :	0.722
Top-5 val acc  :	0.981	(9808/10000)


Epoch 37 in 7.90 sec
Train accuracy :	0.821	(41027/50000)		Train loss :	0.5397
Val accuracy   :	0.796	(7965/10000)		Val loss :	0.6696
Top-5 val acc  :	0.984	(9836/10000)


Epoch 38 in 7.89 sec
Train accuracy :	0.822	(41106/50000)		Train loss :	0.5318
Val accuracy   :	0.787	(7871/10000)		Val loss :	0.6795
Top-5 val acc  :	0.982	(9819/10000)


Epoch 39 in 7.93 sec
Train accuracy :	0.833	(41664/50000)		Train loss :	0.4982
Val accuracy   :	0.805	(8050/10000)		Val loss :	0.6384
Top-5 val acc  :	0.987	(9869/10000)


Epoch 40 in 8.05 sec
Train accuracy :	0.835	(41759/50000)		Train loss :	0.4903
Val accuracy   :	0.793	(7932/10000)		Val loss :	0.652
Top-5 val acc  :	0.985	(9854/10000)


Epoch 41 in 8.00 sec
Train accuracy :	0.843	(42138/50000)		Train loss :	0.4651
Val accuracy   :	0.79	(7900/10000)		Val loss :	0.7105
Top-5 val acc  :	0.985	(9849/10000)


Epoch 42 in 7.86 sec
Train accuracy :	0.852	(42577/50000)		Train loss :	0.4403
Val accuracy   :	0.818	(8178/10000)		Val loss :	0.5907
Top-5 val acc  :	0.987	(9865/10000)


Epoch 43 in 7.89 sec
Train accuracy :	0.862	(43109/50000)		Train loss :	0.4091
Val accuracy   :	0.82	(8195/10000)		Val loss :	0.6073
Top-5 val acc  :	0.989	(9889/10000)


Epoch 44 in 8.02 sec
Train accuracy :	0.867	(43337/50000)		Train loss :	0.3947
Val accuracy   :	0.822	(8223/10000)		Val loss :	0.616
Top-5 val acc  :	0.987	(9868/10000)


Epoch 45 in 7.93 sec
Train accuracy :	0.874	(43699/50000)		Train loss :	0.3722
Val accuracy   :	0.827	(8270/10000)		Val loss :	0.5928
Top-5 val acc  :	0.99	(9901/10000)


Epoch 46 in 7.96 sec
Train accuracy :	0.881	(44054/50000)		Train loss :	0.351
Val accuracy   :	0.823	(8234/10000)		Val loss :	0.624
Top-5 val acc  :	0.99	(9903/10000)


Epoch 47 in 7.89 sec
Train accuracy :	0.885	(44247/50000)		Train loss :	0.3386
Val accuracy   :	0.84	(8403/10000)		Val loss :	0.5838
Top-5 val acc  :	0.989	(9889/10000)


Epoch 48 in 7.83 sec
Train accuracy :	0.892	(44578/50000)		Train loss :	0.3167
Val accuracy   :	0.828	(8283/10000)		Val loss :	0.6079
Top-5 val acc  :	0.986	(9864/10000)


Epoch 49 in 8.18 sec
Train accuracy :	0.896	(44791/50000)		Train loss :	0.3051
Val accuracy   :	0.831	(8310/10000)		Val loss :	0.5836
Top-5 val acc  :	0.99	(9897/10000)


Epoch 50 in 8.02 sec
Train accuracy :	0.905	(45241/50000)		Train loss :	0.2792
Val accuracy   :	0.838	(8384/10000)		Val loss :	0.5704
Top-5 val acc  :	0.991	(9908/10000)


Epoch 51 in 7.97 sec
Train accuracy :	0.908	(45417/50000)		Train loss :	0.2652
Val accuracy   :	0.831	(8310/10000)		Val loss :	0.6112
Top-5 val acc  :	0.986	(9863/10000)


Epoch 52 in 8.00 sec
Train accuracy :	0.915	(45732/50000)		Train loss :	0.2498
Val accuracy   :	0.843	(8431/10000)		Val loss :	0.5597
Top-5 val acc  :	0.992	(9921/10000)


Epoch 53 in 8.02 sec
Train accuracy :	0.924	(46200/50000)		Train loss :	0.2266
Val accuracy   :	0.838	(8382/10000)		Val loss :	0.6184
Top-5 val acc  :	0.99	(9896/10000)


Epoch 54 in 8.00 sec
Train accuracy :	0.928	(46396/50000)		Train loss :	0.2102
Val accuracy   :	0.84	(8398/10000)		Val loss :	0.5788
Top-5 val acc  :	0.988	(9883/10000)


Epoch 55 in 8.03 sec
Train accuracy :	0.933	(46647/50000)		Train loss :	0.1924
Val accuracy   :	0.847	(8468/10000)		Val loss :	0.5704
Top-5 val acc  :	0.991	(9905/10000)


Epoch 56 in 7.97 sec
Train accuracy :	0.936	(46790/50000)		Train loss :	0.1864
Val accuracy   :	0.857	(8565/10000)		Val loss :	0.5444
Top-5 val acc  :	0.992	(9917/10000)


Epoch 57 in 7.92 sec
Train accuracy :	0.942	(47119/50000)		Train loss :	0.1675
Val accuracy   :	0.854	(8539/10000)		Val loss :	0.5779
Top-5 val acc  :	0.991	(9907/10000)


Epoch 58 in 8.05 sec
Train accuracy :	0.947	(47360/50000)		Train loss :	0.1516
Val accuracy   :	0.857	(8573/10000)		Val loss :	0.538
Top-5 val acc  :	0.993	(9929/10000)


Epoch 59 in 8.07 sec
Train accuracy :	0.954	(47687/50000)		Train loss :	0.1379
Val accuracy   :	0.862	(8617/10000)		Val loss :	0.5518
Top-5 val acc  :	0.992	(9922/10000)


Epoch 60 in 8.04 sec
Train accuracy :	0.958	(47924/50000)		Train loss :	0.1201
Val accuracy   :	0.859	(8586/10000)		Val loss :	0.5667
Top-5 val acc  :	0.99	(9901/10000)


Epoch 61 in 8.07 sec
Train accuracy :	0.963	(48128/50000)		Train loss :	0.1095
Val accuracy   :	0.857	(8572/10000)		Val loss :	0.5663
Top-5 val acc  :	0.991	(9914/10000)


Epoch 62 in 7.97 sec
Train accuracy :	0.967	(48352/50000)		Train loss :	0.0964
Val accuracy   :	0.863	(8632/10000)		Val loss :	0.5571
Top-5 val acc  :	0.991	(9914/10000)


Epoch 63 in 7.93 sec
Train accuracy :	0.968	(48418/50000)		Train loss :	0.0936
Val accuracy   :	0.866	(8659/10000)		Val loss :	0.5691
Top-5 val acc  :	0.992	(9916/10000)


Epoch 64 in 8.15 sec
Train accuracy :	0.973	(48640/50000)		Train loss :	0.0801
Val accuracy   :	0.865	(8653/10000)		Val loss :	0.5776
Top-5 val acc  :	0.993	(9931/10000)


Epoch 65 in 7.94 sec
Train accuracy :	0.976	(48779/50000)		Train loss :	0.072
Val accuracy   :	0.863	(8632/10000)		Val loss :	0.5548
Top-5 val acc  :	0.992	(9923/10000)


Epoch 66 in 8.00 sec
Train accuracy :	0.978	(48923/50000)		Train loss :	0.0628
Val accuracy   :	0.868	(8684/10000)		Val loss :	0.5778
Top-5 val acc  :	0.993	(9926/10000)


Epoch 67 in 8.11 sec
Train accuracy :	0.981	(49040/50000)		Train loss :	0.0581
Val accuracy   :	0.868	(8680/10000)		Val loss :	0.5445
Top-5 val acc  :	0.992	(9924/10000)


Epoch 68 in 8.06 sec
Train accuracy :	0.983	(49152/50000)		Train loss :	0.0511
Val accuracy   :	0.872	(8724/10000)		Val loss :	0.5294
Top-5 val acc  :	0.993	(9928/10000)


Epoch 69 in 8.34 sec
Train accuracy :	0.986	(49294/50000)		Train loss :	0.0453
Val accuracy   :	0.872	(8721/10000)		Val loss :	0.5435
Top-5 val acc  :	0.993	(9931/10000)


Epoch 70 in 8.00 sec
Train accuracy :	0.989	(49441/50000)		Train loss :	0.0367
Val accuracy   :	0.874	(8735/10000)		Val loss :	0.5483
Top-5 val acc  :	0.993	(9933/10000)


Epoch 71 in 8.02 sec
Train accuracy :	0.99	(49490/50000)		Train loss :	0.0344
Val accuracy   :	0.877	(8769/10000)		Val loss :	0.546
Top-5 val acc  :	0.994	(9938/10000)


Epoch 72 in 8.06 sec
Train accuracy :	0.991	(49541/50000)		Train loss :	0.03
Val accuracy   :	0.877	(8771/10000)		Val loss :	0.5401
Top-5 val acc  :	0.993	(9931/10000)


Epoch 73 in 8.00 sec
Train accuracy :	0.992	(49597/50000)		Train loss :	0.0274
Val accuracy   :	0.881	(8806/10000)		Val loss :	0.5342
Top-5 val acc  :	0.993	(9931/10000)


Epoch 74 in 8.20 sec
Train accuracy :	0.993	(49655/50000)		Train loss :	0.0248
Val accuracy   :	0.875	(8755/10000)		Val loss :	0.5505
Top-5 val acc  :	0.993	(9932/10000)


Epoch 75 in 7.97 sec
Train accuracy :	0.994	(49680/50000)		Train loss :	0.0226
Val accuracy   :	0.877	(8767/10000)		Val loss :	0.5436
Top-5 val acc  :	0.994	(9938/10000)


Epoch 76 in 7.96 sec
Train accuracy :	0.995	(49728/50000)		Train loss :	0.0203
Val accuracy   :	0.879	(8788/10000)		Val loss :	0.5394
Top-5 val acc  :	0.994	(9938/10000)


Epoch 77 in 7.99 sec
Train accuracy :	0.995	(49763/50000)		Train loss :	0.0184
Val accuracy   :	0.881	(8811/10000)		Val loss :	0.5344
Top-5 val acc  :	0.994	(9939/10000)


Epoch 78 in 7.84 sec
Train accuracy :	0.996	(49781/50000)		Train loss :	0.0169
Val accuracy   :	0.879	(8795/10000)		Val loss :	0.5442
Top-5 val acc  :	0.994	(9935/10000)


Epoch 79 in 8.06 sec
Train accuracy :	0.996	(49796/50000)		Train loss :	0.0167
Val accuracy   :	0.881	(8810/10000)		Val loss :	0.5373
Top-5 val acc  :	0.994	(9939/10000)


Epoch 80 in 7.73 sec
Train accuracy :	0.996	(49809/50000)		Train loss :	0.016
Val accuracy   :	0.882	(8816/10000)		Val loss :	0.543
Top-5 val acc  :	0.993	(9933/10000)


Epoch 81 in 7.95 sec
Train accuracy :	0.997	(49840/50000)		Train loss :	0.0143
Val accuracy   :	0.881	(8809/10000)		Val loss :	0.5419
Top-5 val acc  :	0.994	(9938/10000)


Epoch 82 in 7.87 sec
Train accuracy :	0.997	(49827/50000)		Train loss :	0.0142
Val accuracy   :	0.882	(8816/10000)		Val loss :	0.5431
Top-5 val acc  :	0.994	(9937/10000)


Epoch 83 in 7.94 sec
Train accuracy :	0.997	(49863/50000)		Train loss :	0.0126
Val accuracy   :	0.882	(8819/10000)		Val loss :	0.5473
Top-5 val acc  :	0.994	(9936/10000)


Epoch 84 in 8.10 sec
Train accuracy :	0.997	(49867/50000)		Train loss :	0.0124
Val accuracy   :	0.881	(8806/10000)		Val loss :	0.545
Top-5 val acc  :	0.994	(9938/10000)


Epoch 85 in 7.89 sec
Train accuracy :	0.998	(49890/50000)		Train loss :	0.0119
Val accuracy   :	0.881	(8812/10000)		Val loss :	0.5419
Top-5 val acc  :	0.994	(9938/10000)


Epoch 86 in 7.94 sec
Train accuracy :	0.997	(49871/50000)		Train loss :	0.0124
Val accuracy   :	0.881	(8808/10000)		Val loss :	0.547
Top-5 val acc  :	0.993	(9933/10000)


Epoch 87 in 7.97 sec
Train accuracy :	0.998	(49880/50000)		Train loss :	0.0117
Val accuracy   :	0.88	(8796/10000)		Val loss :	0.5468
Top-5 val acc  :	0.994	(9936/10000)


Epoch 88 in 7.96 sec
Train accuracy :	0.998	(49897/50000)		Train loss :	0.0113
Val accuracy   :	0.881	(8815/10000)		Val loss :	0.5445
Top-5 val acc  :	0.994	(9936/10000)


Epoch 89 in 8.01 sec
Train accuracy :	0.997	(49861/50000)		Train loss :	0.0126
Val accuracy   :	0.882	(8816/10000)		Val loss :	0.5425
Top-5 val acc  :	0.994	(9938/10000)


Epoch 90 in 7.90 sec
Train accuracy :	0.998	(49886/50000)		Train loss :	0.0116
Val accuracy   :	0.882	(8816/10000)		Val loss :	0.5432
Top-5 val acc  :	0.994	(9938/10000)
