# Supplementary material
Source: ML conference proceedings conference paper supplement (https://proceedings.neurips.cc/paper_files/paper/2022/hash/545a114e655f9d25ba0d56ea9a01fc6e-Abstract.html)
Supplement: Supplementary file 1 [file 545a114e655f9d25ba0d56ea9a01fc6e-Supplemental-Conference.zip › revised_supplemental/code/results/table2/bp_cif100/2022-05-09_21-00-09_xvgg4_bp_cif100_soft_relu_wd1e-2_run3/log.txt]

python train.py simus/bp/cnn/xvgg4_cif100.json


Epoch 1 in 14.12 sec
Train accuracy :	0.091	(4552/50000)		Train loss :	3.9734
Val accuracy   :	0.15	(1499/10000)		Val loss :	3.5993
Top-5 val acc  :	0.404	(4038/10000)


Epoch 2 in 7.75 sec
Train accuracy :	0.182	(9076/50000)		Train loss :	3.433
Val accuracy   :	0.213	(2135/10000)		Val loss :	3.2732
Top-5 val acc  :	0.496	(4963/10000)


Epoch 3 in 7.74 sec
Train accuracy :	0.224	(11182/50000)		Train loss :	3.2008
Val accuracy   :	0.233	(2333/10000)		Val loss :	3.1977
Top-5 val acc  :	0.525	(5254/10000)


Epoch 4 in 7.76 sec
Train accuracy :	0.249	(12441/50000)		Train loss :	3.0736
Val accuracy   :	0.25	(2499/10000)		Val loss :	3.0529
Top-5 val acc  :	0.551	(5509/10000)


Epoch 5 in 7.71 sec
Train accuracy :	0.265	(13235/50000)		Train loss :	3.0024
Val accuracy   :	0.269	(2686/10000)		Val loss :	3.0104
Top-5 val acc  :	0.553	(5529/10000)


Epoch 6 in 7.96 sec
Train accuracy :	0.278	(13918/50000)		Train loss :	2.9306
Val accuracy   :	0.284	(2841/10000)		Val loss :	2.8949
Top-5 val acc  :	0.583	(5834/10000)


Epoch 7 in 7.82 sec
Train accuracy :	0.293	(14674/50000)		Train loss :	2.8557
Val accuracy   :	0.287	(2873/10000)		Val loss :	2.8684
Top-5 val acc  :	0.596	(5963/10000)


Epoch 8 in 7.78 sec
Train accuracy :	0.296	(14813/50000)		Train loss :	2.8176
Val accuracy   :	0.302	(3019/10000)		Val loss :	2.832
Top-5 val acc  :	0.607	(6068/10000)


Epoch 9 in 7.77 sec
Train accuracy :	0.306	(15311/50000)		Train loss :	2.7834
Val accuracy   :	0.317	(3172/10000)		Val loss :	2.7103
Top-5 val acc  :	0.633	(6331/10000)


Epoch 10 in 7.81 sec
Train accuracy :	0.319	(15952/50000)		Train loss :	2.7295
Val accuracy   :	0.333	(3330/10000)		Val loss :	2.6667
Top-5 val acc  :	0.647	(6467/10000)


Epoch 11 in 7.95 sec
Train accuracy :	0.323	(16149/50000)		Train loss :	2.7099
Val accuracy   :	0.335	(3352/10000)		Val loss :	2.7141
Top-5 val acc  :	0.648	(6480/10000)


Epoch 12 in 7.81 sec
Train accuracy :	0.329	(16456/50000)		Train loss :	2.6794
Val accuracy   :	0.322	(3221/10000)		Val loss :	2.735
Top-5 val acc  :	0.63	(6305/10000)


Epoch 13 in 7.79 sec
Train accuracy :	0.333	(16625/50000)		Train loss :	2.657
Val accuracy   :	0.324	(3243/10000)		Val loss :	2.8232
Top-5 val acc  :	0.628	(6277/10000)


Epoch 14 in 7.73 sec
Train accuracy :	0.342	(17083/50000)		Train loss :	2.6169
Val accuracy   :	0.337	(3366/10000)		Val loss :	2.6336
Top-5 val acc  :	0.651	(6507/10000)


Epoch 15 in 7.86 sec
Train accuracy :	0.345	(17263/50000)		Train loss :	2.6007
Val accuracy   :	0.351	(3506/10000)		Val loss :	2.582
Top-5 val acc  :	0.662	(6621/10000)


Epoch 16 in 7.98 sec
Train accuracy :	0.348	(17404/50000)		Train loss :	2.5965
Val accuracy   :	0.367	(3675/10000)		Val loss :	2.5507
Top-5 val acc  :	0.662	(6618/10000)


Epoch 17 in 7.79 sec
Train accuracy :	0.355	(17759/50000)		Train loss :	2.5578
Val accuracy   :	0.347	(3475/10000)		Val loss :	2.6292
Top-5 val acc  :	0.654	(6539/10000)


Epoch 18 in 7.70 sec
Train accuracy :	0.36	(18002/50000)		Train loss :	2.5305
Val accuracy   :	0.333	(3328/10000)		Val loss :	2.6786
Top-5 val acc  :	0.632	(6317/10000)


Epoch 19 in 7.77 sec
Train accuracy :	0.368	(18392/50000)		Train loss :	2.5059
Val accuracy   :	0.332	(3322/10000)		Val loss :	2.6739
Top-5 val acc  :	0.637	(6369/10000)


Epoch 20 in 7.81 sec
Train accuracy :	0.374	(18711/50000)		Train loss :	2.4703
Val accuracy   :	0.374	(3738/10000)		Val loss :	2.4745
Top-5 val acc  :	0.684	(6838/10000)


Epoch 21 in 7.93 sec
Train accuracy :	0.37	(18488/50000)		Train loss :	2.4785
Val accuracy   :	0.364	(3641/10000)		Val loss :	2.58
Top-5 val acc  :	0.667	(6674/10000)


Epoch 22 in 7.76 sec
Train accuracy :	0.383	(19150/50000)		Train loss :	2.4289
Val accuracy   :	0.334	(3343/10000)		Val loss :	2.7091
Top-5 val acc  :	0.637	(6373/10000)


Epoch 23 in 7.84 sec
Train accuracy :	0.382	(19092/50000)		Train loss :	2.4285
Val accuracy   :	0.369	(3695/10000)		Val loss :	2.5394
Top-5 val acc  :	0.686	(6863/10000)


Epoch 24 in 7.82 sec
Train accuracy :	0.392	(19606/50000)		Train loss :	2.3773
Val accuracy   :	0.393	(3932/10000)		Val loss :	2.4106
Top-5 val acc  :	0.708	(7076/10000)


Epoch 25 in 7.75 sec
Train accuracy :	0.396	(19776/50000)		Train loss :	2.3563
Val accuracy   :	0.398	(3977/10000)		Val loss :	2.3776
Top-5 val acc  :	0.707	(7071/10000)


Epoch 26 in 7.90 sec
Train accuracy :	0.403	(20153/50000)		Train loss :	2.339
Val accuracy   :	0.408	(4082/10000)		Val loss :	2.3681
Top-5 val acc  :	0.706	(7061/10000)


Epoch 27 in 7.78 sec
Train accuracy :	0.406	(20281/50000)		Train loss :	2.311
Val accuracy   :	0.38	(3804/10000)		Val loss :	2.4225
Top-5 val acc  :	0.699	(6989/10000)


Epoch 28 in 7.84 sec
Train accuracy :	0.414	(20684/50000)		Train loss :	2.28
Val accuracy   :	0.403	(4031/10000)		Val loss :	2.3492
Top-5 val acc  :	0.705	(7047/10000)


Epoch 29 in 7.89 sec
Train accuracy :	0.42	(20990/50000)		Train loss :	2.2443
Val accuracy   :	0.401	(4007/10000)		Val loss :	2.3528
Top-5 val acc  :	0.702	(7020/10000)


Epoch 30 in 7.69 sec
Train accuracy :	0.425	(21246/50000)		Train loss :	2.2183
Val accuracy   :	0.407	(4075/10000)		Val loss :	2.3287
Top-5 val acc  :	0.716	(7156/10000)


Epoch 31 in 8.00 sec
Train accuracy :	0.431	(21530/50000)		Train loss :	2.1791
Val accuracy   :	0.391	(3911/10000)		Val loss :	2.46
Top-5 val acc  :	0.682	(6819/10000)


Epoch 32 in 7.84 sec
Train accuracy :	0.434	(21722/50000)		Train loss :	2.1685
Val accuracy   :	0.414	(4145/10000)		Val loss :	2.3136
Top-5 val acc  :	0.725	(7253/10000)


Epoch 33 in 7.82 sec
Train accuracy :	0.45	(22513/50000)		Train loss :	2.1175
Val accuracy   :	0.425	(4253/10000)		Val loss :	2.2519
Top-5 val acc  :	0.722	(7223/10000)


Epoch 34 in 7.87 sec
Train accuracy :	0.453	(22645/50000)		Train loss :	2.0759
Val accuracy   :	0.44	(4404/10000)		Val loss :	2.2554
Top-5 val acc  :	0.732	(7318/10000)


Epoch 35 in 7.88 sec
Train accuracy :	0.457	(22846/50000)		Train loss :	2.0707
Val accuracy   :	0.435	(4355/10000)		Val loss :	2.2037
Top-5 val acc  :	0.733	(7331/10000)


Epoch 36 in 7.91 sec
Train accuracy :	0.468	(23380/50000)		Train loss :	2.027
Val accuracy   :	0.439	(4391/10000)		Val loss :	2.1959
Top-5 val acc  :	0.744	(7437/10000)


Epoch 37 in 7.90 sec
Train accuracy :	0.474	(23682/50000)		Train loss :	1.9984
Val accuracy   :	0.44	(4397/10000)		Val loss :	2.2023
Top-5 val acc  :	0.746	(7464/10000)


Epoch 38 in 7.81 sec
Train accuracy :	0.485	(24268/50000)		Train loss :	1.9437
Val accuracy   :	0.446	(4456/10000)		Val loss :	2.162
Top-5 val acc  :	0.745	(7453/10000)


Epoch 39 in 7.92 sec
Train accuracy :	0.489	(24433/50000)		Train loss :	1.9301
Val accuracy   :	0.456	(4557/10000)		Val loss :	2.1364
Top-5 val acc  :	0.751	(7506/10000)


Epoch 40 in 7.72 sec
Train accuracy :	0.495	(24762/50000)		Train loss :	1.8948
Val accuracy   :	0.456	(4558/10000)		Val loss :	2.1285
Top-5 val acc  :	0.752	(7523/10000)


Epoch 41 in 7.91 sec
Train accuracy :	0.506	(25319/50000)		Train loss :	1.8587
Val accuracy   :	0.465	(4647/10000)		Val loss :	2.0831
Top-5 val acc  :	0.765	(7655/10000)


Epoch 42 in 7.92 sec
Train accuracy :	0.515	(25733/50000)		Train loss :	1.8105
Val accuracy   :	0.472	(4717/10000)		Val loss :	2.071
Top-5 val acc  :	0.771	(7707/10000)


Epoch 43 in 7.73 sec
Train accuracy :	0.522	(26089/50000)		Train loss :	1.7684
Val accuracy   :	0.48	(4804/10000)		Val loss :	2.0251
Top-5 val acc  :	0.771	(7714/10000)


Epoch 44 in 7.82 sec
Train accuracy :	0.531	(26534/50000)		Train loss :	1.7407
Val accuracy   :	0.479	(4788/10000)		Val loss :	2.0272
Top-5 val acc  :	0.767	(7672/10000)


Epoch 45 in 7.74 sec
Train accuracy :	0.539	(26927/50000)		Train loss :	1.7053
Val accuracy   :	0.471	(4710/10000)		Val loss :	2.1035
Top-5 val acc  :	0.762	(7624/10000)


Epoch 46 in 7.87 sec
Train accuracy :	0.547	(27333/50000)		Train loss :	1.6712
Val accuracy   :	0.491	(4911/10000)		Val loss :	1.9731
Top-5 val acc  :	0.78	(7800/10000)


Epoch 47 in 7.76 sec
Train accuracy :	0.555	(27750/50000)		Train loss :	1.6289
Val accuracy   :	0.49	(4901/10000)		Val loss :	2.0177
Top-5 val acc  :	0.78	(7798/10000)


Epoch 48 in 7.79 sec
Train accuracy :	0.564	(28193/50000)		Train loss :	1.5873
Val accuracy   :	0.486	(4860/10000)		Val loss :	2.0037
Top-5 val acc  :	0.779	(7787/10000)


Epoch 49 in 7.87 sec
Train accuracy :	0.573	(28648/50000)		Train loss :	1.5514
Val accuracy   :	0.485	(4849/10000)		Val loss :	2.0438
Top-5 val acc  :	0.782	(7824/10000)


Epoch 50 in 7.80 sec
Train accuracy :	0.587	(29331/50000)		Train loss :	1.4982
Val accuracy   :	0.519	(5189/10000)		Val loss :	1.8503
Top-5 val acc  :	0.799	(7995/10000)


Epoch 51 in 7.89 sec
Train accuracy :	0.591	(29536/50000)		Train loss :	1.4685
Val accuracy   :	0.508	(5084/10000)		Val loss :	1.9336
Top-5 val acc  :	0.794	(7941/10000)


Epoch 52 in 7.83 sec
Train accuracy :	0.605	(30227/50000)		Train loss :	1.4179
Val accuracy   :	0.526	(5256/10000)		Val loss :	1.8378
Top-5 val acc  :	0.805	(8052/10000)


Epoch 53 in 7.78 sec
Train accuracy :	0.616	(30814/50000)		Train loss :	1.3675
Val accuracy   :	0.534	(5343/10000)		Val loss :	1.8253
Top-5 val acc  :	0.81	(8105/10000)


Epoch 54 in 7.88 sec
Train accuracy :	0.624	(31182/50000)		Train loss :	1.3329
Val accuracy   :	0.523	(5230/10000)		Val loss :	1.9346
Top-5 val acc  :	0.805	(8050/10000)


Epoch 55 in 7.81 sec
Train accuracy :	0.638	(31915/50000)		Train loss :	1.2912
Val accuracy   :	0.53	(5298/10000)		Val loss :	1.8586
Top-5 val acc  :	0.808	(8078/10000)


Epoch 56 in 7.87 sec
Train accuracy :	0.648	(32377/50000)		Train loss :	1.242
Val accuracy   :	0.515	(5150/10000)		Val loss :	1.9529
Top-5 val acc  :	0.805	(8047/10000)


Epoch 57 in 7.81 sec
Train accuracy :	0.66	(33012/50000)		Train loss :	1.2
Val accuracy   :	0.53	(5304/10000)		Val loss :	1.8654
Top-5 val acc  :	0.81	(8097/10000)


Epoch 58 in 7.79 sec
Train accuracy :	0.67	(33491/50000)		Train loss :	1.1523
Val accuracy   :	0.548	(5480/10000)		Val loss :	1.7764
Top-5 val acc  :	0.821	(8210/10000)


Epoch 59 in 7.95 sec
Train accuracy :	0.682	(34094/50000)		Train loss :	1.1036
Val accuracy   :	0.54	(5398/10000)		Val loss :	1.7984
Top-5 val acc  :	0.818	(8184/10000)


Epoch 60 in 7.71 sec
Train accuracy :	0.69	(34479/50000)		Train loss :	1.0688
Val accuracy   :	0.543	(5434/10000)		Val loss :	1.8495
Top-5 val acc  :	0.814	(8136/10000)


Epoch 61 in 7.82 sec
Train accuracy :	0.705	(35254/50000)		Train loss :	1.0115
Val accuracy   :	0.553	(5526/10000)		Val loss :	1.7856
Top-5 val acc  :	0.825	(8245/10000)


Epoch 62 in 7.94 sec
Train accuracy :	0.72	(35998/50000)		Train loss :	0.9603
Val accuracy   :	0.556	(5565/10000)		Val loss :	1.8081
Top-5 val acc  :	0.824	(8236/10000)


Epoch 63 in 7.66 sec
Train accuracy :	0.731	(36555/50000)		Train loss :	0.9126
Val accuracy   :	0.579	(5785/10000)		Val loss :	1.7494
Top-5 val acc  :	0.837	(8370/10000)


Epoch 64 in 7.82 sec
Train accuracy :	0.746	(37309/50000)		Train loss :	0.8576
Val accuracy   :	0.565	(5653/10000)		Val loss :	1.748
Top-5 val acc  :	0.834	(8343/10000)


Epoch 65 in 7.80 sec
Train accuracy :	0.759	(37960/50000)		Train loss :	0.8132
Val accuracy   :	0.572	(5716/10000)		Val loss :	1.7884
Top-5 val acc  :	0.833	(8329/10000)


Epoch 66 in 7.75 sec
Train accuracy :	0.77	(38515/50000)		Train loss :	0.7777
Val accuracy   :	0.572	(5716/10000)		Val loss :	1.7667
Top-5 val acc  :	0.83	(8296/10000)


Epoch 67 in 7.94 sec
Train accuracy :	0.782	(39089/50000)		Train loss :	0.7322
Val accuracy   :	0.586	(5864/10000)		Val loss :	1.7425
Top-5 val acc  :	0.837	(8368/10000)


Epoch 68 in 7.79 sec
Train accuracy :	0.8	(40006/50000)		Train loss :	0.6652
Val accuracy   :	0.585	(5846/10000)		Val loss :	1.7653
Top-5 val acc  :	0.837	(8367/10000)


Epoch 69 in 7.76 sec
Train accuracy :	0.814	(40709/50000)		Train loss :	0.6208
Val accuracy   :	0.591	(5906/10000)		Val loss :	1.7918
Top-5 val acc  :	0.839	(8392/10000)


Epoch 70 in 7.90 sec
Train accuracy :	0.827	(41329/50000)		Train loss :	0.5749
Val accuracy   :	0.587	(5873/10000)		Val loss :	1.7711
Top-5 val acc  :	0.841	(8414/10000)


Epoch 71 in 7.79 sec
Train accuracy :	0.833	(41669/50000)		Train loss :	0.5447
Val accuracy   :	0.591	(5914/10000)		Val loss :	1.7929
Top-5 val acc  :	0.842	(8424/10000)


Epoch 72 in 7.88 sec
Train accuracy :	0.853	(42651/50000)		Train loss :	0.4844
Val accuracy   :	0.598	(5977/10000)		Val loss :	1.7647
Top-5 val acc  :	0.847	(8466/10000)


Epoch 73 in 7.77 sec
Train accuracy :	0.864	(43205/50000)		Train loss :	0.4464
Val accuracy   :	0.598	(5976/10000)		Val loss :	1.7697
Top-5 val acc  :	0.846	(8461/10000)


Epoch 74 in 7.79 sec
Train accuracy :	0.88	(44015/50000)		Train loss :	0.3985
Val accuracy   :	0.596	(5960/10000)		Val loss :	1.7916
Top-5 val acc  :	0.844	(8440/10000)


Epoch 75 in 7.84 sec
Train accuracy :	0.89	(44513/50000)		Train loss :	0.3646
Val accuracy   :	0.6	(6001/10000)		Val loss :	1.8593
Top-5 val acc  :	0.848	(8475/10000)


Epoch 76 in 7.72 sec
Train accuracy :	0.903	(45131/50000)		Train loss :	0.325
Val accuracy   :	0.602	(6015/10000)		Val loss :	1.8177
Top-5 val acc  :	0.85	(8499/10000)


Epoch 77 in 7.93 sec
Train accuracy :	0.912	(45621/50000)		Train loss :	0.2961
Val accuracy   :	0.604	(6038/10000)		Val loss :	1.8279
Top-5 val acc  :	0.849	(8488/10000)


Epoch 78 in 7.79 sec
Train accuracy :	0.921	(46043/50000)		Train loss :	0.2756
Val accuracy   :	0.607	(6070/10000)		Val loss :	1.8223
Top-5 val acc  :	0.848	(8480/10000)


Epoch 79 in 7.93 sec
Train accuracy :	0.931	(46545/50000)		Train loss :	0.2465
Val accuracy   :	0.614	(6141/10000)		Val loss :	1.849
Top-5 val acc  :	0.852	(8521/10000)


Epoch 80 in 7.79 sec
Train accuracy :	0.939	(46971/50000)		Train loss :	0.2194
Val accuracy   :	0.612	(6116/10000)		Val loss :	1.8585
Top-5 val acc  :	0.85	(8496/10000)


Epoch 81 in 7.99 sec
Train accuracy :	0.949	(47426/50000)		Train loss :	0.1951
Val accuracy   :	0.617	(6166/10000)		Val loss :	1.867
Top-5 val acc  :	0.857	(8565/10000)


Epoch 82 in 7.82 sec
Train accuracy :	0.953	(47652/50000)		Train loss :	0.1789
Val accuracy   :	0.618	(6184/10000)		Val loss :	1.8405
Top-5 val acc  :	0.854	(8540/10000)


Epoch 83 in 7.67 sec
Train accuracy :	0.958	(47918/50000)		Train loss :	0.1631
Val accuracy   :	0.62	(6204/10000)		Val loss :	1.8833
Top-5 val acc  :	0.859	(8585/10000)


Epoch 84 in 7.79 sec
Train accuracy :	0.962	(48082/50000)		Train loss :	0.1556
Val accuracy   :	0.618	(6176/10000)		Val loss :	1.8382
Top-5 val acc  :	0.858	(8583/10000)


Epoch 85 in 7.83 sec
Train accuracy :	0.965	(48232/50000)		Train loss :	0.1456
Val accuracy   :	0.618	(6175/10000)		Val loss :	1.854
Top-5 val acc  :	0.858	(8580/10000)


Epoch 86 in 7.85 sec
Train accuracy :	0.968	(48400/50000)		Train loss :	0.1377
Val accuracy   :	0.622	(6215/10000)		Val loss :	1.8549
Top-5 val acc  :	0.859	(8586/10000)


Epoch 87 in 7.87 sec
Train accuracy :	0.971	(48527/50000)		Train loss :	0.1301
Val accuracy   :	0.62	(6198/10000)		Val loss :	1.8697
Top-5 val acc  :	0.86	(8595/10000)


Epoch 88 in 7.83 sec
Train accuracy :	0.971	(48556/50000)		Train loss :	0.1281
Val accuracy   :	0.62	(6200/10000)		Val loss :	1.8775
Top-5 val acc  :	0.86	(8595/10000)


Epoch 89 in 7.85 sec
Train accuracy :	0.972	(48624/50000)		Train loss :	0.1239
Val accuracy   :	0.621	(6206/10000)		Val loss :	1.868
Top-5 val acc  :	0.86	(8595/10000)


Epoch 90 in 7.80 sec
Train accuracy :	0.974	(48717/50000)		Train loss :	0.1203
Val accuracy   :	0.621	(6207/10000)		Val loss :	1.8701
Top-5 val acc  :	0.86	(8602/10000)
