# Supplementary material
Source: ML conference proceedings conference paper supplement (https://proceedings.neurips.cc/paper_files/paper/2022/hash/545a114e655f9d25ba0d56ea9a01fc6e-Abstract.html)
Supplement: Supplementary file 1 [file 545a114e655f9d25ba0d56ea9a01fc6e-Supplemental-Conference.zip › revised_supplemental/code/results/table2/ep_cif10/2022-05-11_09-32-10_xpvgg_cif10_soft_ep2_mholo1_beta1_wd2e-3_run2/log.txt]

python train.py simus/ep/cnn/xpvgg4_cif10.json

Input   :	 (32, 32, 3)
Layer 1 :	 (16, 16, 128)
Layer 2 :	 (8, 8, 256)
Layer 3 :	 (4, 4, 512)
Layer 4 :	 (1, 1, 512)

Mean log L2 = -4.777144432067871
Total dropped = 0
param norm = 33.096073150634766

Epoch 1 in 604.64 sec
Train accuracy :	0.296	(14806/50000)		Train loss :	1.8832
Val accuracy   :	0.41	(4100/10000)		Val loss :	1.5891
Top-5 val acc  :	0.906	(9060/10000)


Mean log L2 = -4.585808753967285
Total dropped = 0
param norm = 34.54273986816406

Epoch 2 in 231.85 sec
Train accuracy :	0.476	(23780/50000)		Train loss :	1.4268
Val accuracy   :	0.548	(5477/10000)		Val loss :	1.2415
Top-5 val acc  :	0.95	(9497/10000)


Mean log L2 = -4.279824256896973
Total dropped = 0
param norm = 36.62266540527344

Epoch 3 in 231.75 sec
Train accuracy :	0.579	(28930/50000)		Train loss :	1.1751
Val accuracy   :	0.601	(6006/10000)		Val loss :	1.1129
Top-5 val acc  :	0.96	(9595/10000)


Mean log L2 = -3.905972719192505
Total dropped = 0
param norm = 38.540313720703125

Epoch 4 in 231.63 sec
Train accuracy :	0.648	(32408/50000)		Train loss :	1.0038
Val accuracy   :	0.666	(6665/10000)		Val loss :	0.9324
Top-5 val acc  :	0.973	(9726/10000)


Mean log L2 = -3.7734997272491455
Total dropped = 0
param norm = 40.198177337646484

Epoch 5 in 231.94 sec
Train accuracy :	0.689	(34449/50000)		Train loss :	0.8984
Val accuracy   :	0.706	(7056/10000)		Val loss :	0.8559
Top-5 val acc  :	0.977	(9769/10000)


Mean log L2 = -3.616520404815674
Total dropped = 0
param norm = 41.58794403076172

Epoch 6 in 231.73 sec
Train accuracy :	0.718	(35883/50000)		Train loss :	0.8207
Val accuracy   :	0.729	(7294/10000)		Val loss :	0.7934
Top-5 val acc  :	0.98	(9801/10000)


Mean log L2 = -3.363335132598877
Total dropped = 0
param norm = 42.82821273803711

Epoch 7 in 231.71 sec
Train accuracy :	0.734	(36675/50000)		Train loss :	0.7762
Val accuracy   :	0.711	(7107/10000)		Val loss :	0.8399
Top-5 val acc  :	0.977	(9772/10000)


Mean log L2 = -3.5406455993652344
Total dropped = 0
param norm = 43.83507537841797

Epoch 8 in 231.67 sec
Train accuracy :	0.751	(37554/50000)		Train loss :	0.7279
Val accuracy   :	0.759	(7590/10000)		Val loss :	0.696
Top-5 val acc  :	0.983	(9834/10000)


Mean log L2 = -3.421860456466675
Total dropped = 0
param norm = 44.72200393676758

Epoch 9 in 231.78 sec
Train accuracy :	0.762	(38079/50000)		Train loss :	0.6921
Val accuracy   :	0.745	(7451/10000)		Val loss :	0.7432
Top-5 val acc  :	0.983	(9828/10000)


Mean log L2 = -3.3043205738067627
Total dropped = 0
param norm = 45.646854400634766

Epoch 10 in 231.66 sec
Train accuracy :	0.774	(38709/50000)		Train loss :	0.6671
Val accuracy   :	0.763	(7633/10000)		Val loss :	0.6878
Top-5 val acc  :	0.986	(9860/10000)


Mean log L2 = -2.858419179916382
Total dropped = 0
param norm = 46.29477310180664

Epoch 11 in 231.69 sec
Train accuracy :	0.782	(39086/50000)		Train loss :	0.6366
Val accuracy   :	0.76	(7596/10000)		Val loss :	0.6983
Top-5 val acc  :	0.985	(9845/10000)


Mean log L2 = -3.223238468170166
Total dropped = 0
param norm = 46.93229675292969

Epoch 12 in 231.68 sec
Train accuracy :	0.79	(39518/50000)		Train loss :	0.6183
Val accuracy   :	0.767	(7667/10000)		Val loss :	0.6764
Top-5 val acc  :	0.985	(9851/10000)


Mean log L2 = -2.9797451496124268
Total dropped = 0
param norm = 47.53537368774414

Epoch 13 in 231.65 sec
Train accuracy :	0.796	(39787/50000)		Train loss :	0.5946
Val accuracy   :	0.765	(7649/10000)		Val loss :	0.6899
Top-5 val acc  :	0.987	(9867/10000)


Mean log L2 = -3.286215305328369
Total dropped = 0
param norm = 48.17823791503906

Epoch 14 in 231.71 sec
Train accuracy :	0.804	(40176/50000)		Train loss :	0.581
Val accuracy   :	0.786	(7857/10000)		Val loss :	0.6306
Top-5 val acc  :	0.985	(9854/10000)


Mean log L2 = -3.1752126216888428
Total dropped = 0
param norm = 48.66701889038086

Epoch 15 in 231.77 sec
Train accuracy :	0.808	(40412/50000)		Train loss :	0.5624
Val accuracy   :	0.798	(7977/10000)		Val loss :	0.5962
Top-5 val acc  :	0.988	(9880/10000)


Mean log L2 = -3.192566394805908
Total dropped = 0
param norm = 49.07317352294922

Epoch 16 in 231.65 sec
Train accuracy :	0.815	(40758/50000)		Train loss :	0.5462
Val accuracy   :	0.799	(7991/10000)		Val loss :	0.5812
Top-5 val acc  :	0.989	(9890/10000)


Mean log L2 = -3.170970916748047
Total dropped = 0
param norm = 49.390403747558594

Epoch 17 in 231.69 sec
Train accuracy :	0.82	(41020/50000)		Train loss :	0.531
Val accuracy   :	0.787	(7867/10000)		Val loss :	0.6255
Top-5 val acc  :	0.988	(9884/10000)


Mean log L2 = -2.864928960800171
Total dropped = 0
param norm = 49.710994720458984

Epoch 18 in 231.74 sec
Train accuracy :	0.826	(41310/50000)		Train loss :	0.5158
Val accuracy   :	0.792	(7919/10000)		Val loss :	0.6207
Top-5 val acc  :	0.985	(9851/10000)


Mean log L2 = -3.0213024616241455
Total dropped = 0
param norm = 50.19166564941406

Epoch 19 in 231.75 sec
Train accuracy :	0.824	(41208/50000)		Train loss :	0.5145
Val accuracy   :	0.798	(7980/10000)		Val loss :	0.588
Top-5 val acc  :	0.989	(9887/10000)


Mean log L2 = -3.147958278656006
Total dropped = 0
param norm = 50.438385009765625

Epoch 20 in 231.61 sec
Train accuracy :	0.83	(41476/50000)		Train loss :	0.4975
Val accuracy   :	0.8	(7997/10000)		Val loss :	0.5997
Top-5 val acc  :	0.988	(9875/10000)


Mean log L2 = -3.1503665447235107
Total dropped = 0
param norm = 50.713417053222656

Epoch 21 in 231.70 sec
Train accuracy :	0.839	(41943/50000)		Train loss :	0.4836
Val accuracy   :	0.801	(8006/10000)		Val loss :	0.5851
Top-5 val acc  :	0.987	(9871/10000)


Mean log L2 = -3.0684609413146973
Total dropped = 0
param norm = 51.036922454833984

Epoch 22 in 231.67 sec
Train accuracy :	0.839	(41940/50000)		Train loss :	0.4766
Val accuracy   :	0.818	(8177/10000)		Val loss :	0.5381
Top-5 val acc  :	0.989	(9894/10000)


Mean log L2 = -3.1321208477020264
Total dropped = 0
param norm = 51.25346374511719

Epoch 23 in 231.61 sec
Train accuracy :	0.845	(42240/50000)		Train loss :	0.4644
Val accuracy   :	0.814	(8140/10000)		Val loss :	0.5483
Top-5 val acc  :	0.989	(9892/10000)


Mean log L2 = -2.7227227687835693
Total dropped = 0
param norm = 51.477046966552734

Epoch 24 in 231.68 sec
Train accuracy :	0.847	(42371/50000)		Train loss :	0.4536
Val accuracy   :	0.814	(8137/10000)		Val loss :	0.5522
Top-5 val acc  :	0.989	(9889/10000)


Mean log L2 = -3.0290374755859375
Total dropped = 0
param norm = 51.52701187133789

Epoch 25 in 231.81 sec
Train accuracy :	0.855	(42735/50000)		Train loss :	0.4368
Val accuracy   :	0.798	(7980/10000)		Val loss :	0.6004
Top-5 val acc  :	0.987	(9872/10000)


Mean log L2 = -3.260166883468628
Total dropped = 0
param norm = 51.63793182373047

Epoch 26 in 231.68 sec
Train accuracy :	0.853	(42672/50000)		Train loss :	0.4355
Val accuracy   :	0.805	(8054/10000)		Val loss :	0.5784
Top-5 val acc  :	0.988	(9875/10000)


Mean log L2 = -2.9531495571136475
Total dropped = 0
param norm = 51.75426483154297

Epoch 27 in 231.66 sec
Train accuracy :	0.858	(42907/50000)		Train loss :	0.4218
Val accuracy   :	0.797	(7973/10000)		Val loss :	0.6025
Top-5 val acc  :	0.988	(9884/10000)


Mean log L2 = -3.196338176727295
Total dropped = 0
param norm = 51.730751037597656

Epoch 28 in 231.70 sec
Train accuracy :	0.865	(43264/50000)		Train loss :	0.4035
Val accuracy   :	0.824	(8243/10000)		Val loss :	0.5268
Top-5 val acc  :	0.99	(9896/10000)


Mean log L2 = -3.0575244426727295
Total dropped = 0
param norm = 51.78371810913086

Epoch 29 in 231.58 sec
Train accuracy :	0.865	(43257/50000)		Train loss :	0.3987
Val accuracy   :	0.819	(8185/10000)		Val loss :	0.5277
Top-5 val acc  :	0.99	(9897/10000)


Mean log L2 = -3.361299514770508
Total dropped = 0
param norm = 51.8235969543457

Epoch 30 in 231.70 sec
Train accuracy :	0.869	(43435/50000)		Train loss :	0.3921
Val accuracy   :	0.826	(8256/10000)		Val loss :	0.5184
Top-5 val acc  :	0.989	(9894/10000)


Mean log L2 = -3.1361567974090576
Total dropped = 0
param norm = 51.81694412231445

Epoch 31 in 231.94 sec
Train accuracy :	0.874	(43703/50000)		Train loss :	0.3803
Val accuracy   :	0.821	(8209/10000)		Val loss :	0.5335
Top-5 val acc  :	0.99	(9903/10000)


Mean log L2 = -3.2575623989105225
Total dropped = 0
param norm = 51.85788345336914

Epoch 32 in 231.85 sec
Train accuracy :	0.876	(43789/50000)		Train loss :	0.3747
Val accuracy   :	0.824	(8242/10000)		Val loss :	0.5148
Top-5 val acc  :	0.991	(9909/10000)


Mean log L2 = -3.199063539505005
Total dropped = 0
param norm = 51.789249420166016

Epoch 33 in 231.73 sec
Train accuracy :	0.881	(44029/50000)		Train loss :	0.3569
Val accuracy   :	0.839	(8389/10000)		Val loss :	0.4886
Top-5 val acc  :	0.992	(9919/10000)


Mean log L2 = -3.2286298274993896
Total dropped = 0
param norm = 51.81010055541992

Epoch 34 in 231.58 sec
Train accuracy :	0.882	(44107/50000)		Train loss :	0.3565
Val accuracy   :	0.833	(8331/10000)		Val loss :	0.4952
Top-5 val acc  :	0.991	(9912/10000)


Mean log L2 = -3.0804078578948975
Total dropped = 0
param norm = 51.71937561035156

Epoch 35 in 231.89 sec
Train accuracy :	0.883	(44136/50000)		Train loss :	0.3479
Val accuracy   :	0.832	(8322/10000)		Val loss :	0.5181
Top-5 val acc  :	0.992	(9916/10000)


Mean log L2 = -3.273393392562866
Total dropped = 0
param norm = 51.6325569152832

Epoch 36 in 231.65 sec
Train accuracy :	0.89	(44517/50000)		Train loss :	0.3347
Val accuracy   :	0.841	(8406/10000)		Val loss :	0.486
Top-5 val acc  :	0.992	(9922/10000)


Mean log L2 = -3.252603530883789
Total dropped = 0
param norm = 51.59545135498047

Epoch 37 in 231.46 sec
Train accuracy :	0.891	(44534/50000)		Train loss :	0.3303
Val accuracy   :	0.834	(8338/10000)		Val loss :	0.4934
Top-5 val acc  :	0.992	(9918/10000)


Mean log L2 = -3.193532705307007
Total dropped = 0
param norm = 51.53982162475586

Epoch 38 in 231.80 sec
Train accuracy :	0.895	(44741/50000)		Train loss :	0.3176
Val accuracy   :	0.843	(8433/10000)		Val loss :	0.4695
Top-5 val acc  :	0.992	(9919/10000)


Mean log L2 = -3.3081467151641846
Total dropped = 0
param norm = 51.4847412109375

Epoch 39 in 231.90 sec
Train accuracy :	0.897	(44841/50000)		Train loss :	0.3148
Val accuracy   :	0.842	(8417/10000)		Val loss :	0.4721
Top-5 val acc  :	0.993	(9928/10000)


Mean log L2 = -3.4400150775909424
Total dropped = 0
param norm = 51.33012390136719

Epoch 40 in 231.39 sec
Train accuracy :	0.902	(45078/50000)		Train loss :	0.2983
Val accuracy   :	0.842	(8423/10000)		Val loss :	0.4882
Top-5 val acc  :	0.991	(9909/10000)


Mean log L2 = -3.3522396087646484
Total dropped = 0
param norm = 51.12520217895508

Epoch 41 in 232.14 sec
Train accuracy :	0.904	(45185/50000)		Train loss :	0.289
Val accuracy   :	0.841	(8413/10000)		Val loss :	0.4717
Top-5 val acc  :	0.991	(9909/10000)


Mean log L2 = -3.503072500228882
Total dropped = 0
param norm = 50.96186065673828

Epoch 42 in 231.77 sec
Train accuracy :	0.905	(45266/50000)		Train loss :	0.2886
Val accuracy   :	0.852	(8524/10000)		Val loss :	0.4582
Top-5 val acc  :	0.992	(9919/10000)


Mean log L2 = -3.561009168624878
Total dropped = 0
param norm = 50.836761474609375

Epoch 43 in 231.84 sec
Train accuracy :	0.908	(45377/50000)		Train loss :	0.2842
Val accuracy   :	0.844	(8443/10000)		Val loss :	0.4632
Top-5 val acc  :	0.993	(9933/10000)


Mean log L2 = -3.5488758087158203
Total dropped = 0
param norm = 50.61549377441406

Epoch 44 in 231.86 sec
Train accuracy :	0.914	(45714/50000)		Train loss :	0.2621
Val accuracy   :	0.845	(8451/10000)		Val loss :	0.4787
Top-5 val acc  :	0.993	(9930/10000)


Mean log L2 = -3.6173713207244873
Total dropped = 0
param norm = 50.44633102416992

Epoch 45 in 231.70 sec
Train accuracy :	0.916	(45815/50000)		Train loss :	0.2596
Val accuracy   :	0.853	(8526/10000)		Val loss :	0.4514
Top-5 val acc  :	0.994	(9938/10000)


Mean log L2 = -3.356715440750122
Total dropped = 0
param norm = 50.26322555541992

Epoch 46 in 231.81 sec
Train accuracy :	0.92	(46008/50000)		Train loss :	0.2451
Val accuracy   :	0.846	(8460/10000)		Val loss :	0.4743
Top-5 val acc  :	0.993	(9931/10000)


Mean log L2 = -3.4417190551757812
Total dropped = 0
param norm = 50.09754180908203

Epoch 47 in 231.73 sec
Train accuracy :	0.92	(45986/50000)		Train loss :	0.247
Val accuracy   :	0.853	(8526/10000)		Val loss :	0.4532
Top-5 val acc  :	0.993	(9927/10000)


Mean log L2 = -3.599050998687744
Total dropped = 0
param norm = 49.88777542114258

Epoch 48 in 231.75 sec
Train accuracy :	0.927	(46342/50000)		Train loss :	0.2281
Val accuracy   :	0.857	(8574/10000)		Val loss :	0.4352
Top-5 val acc  :	0.992	(9924/10000)


Mean log L2 = -3.636241912841797
Total dropped = 0
param norm = 49.642757415771484

Epoch 49 in 232.04 sec
Train accuracy :	0.928	(46401/50000)		Train loss :	0.2227
Val accuracy   :	0.851	(8506/10000)		Val loss :	0.471
Top-5 val acc  :	0.993	(9927/10000)


Mean log L2 = -3.685114622116089
Total dropped = 0
param norm = 49.39361572265625

Epoch 50 in 231.65 sec
Train accuracy :	0.932	(46600/50000)		Train loss :	0.2137
Val accuracy   :	0.862	(8619/10000)		Val loss :	0.4504
Top-5 val acc  :	0.993	(9932/10000)


Mean log L2 = -3.293337345123291
Total dropped = 0
param norm = 49.1580924987793

Epoch 51 in 231.74 sec
Train accuracy :	0.935	(46729/50000)		Train loss :	0.2063
Val accuracy   :	0.863	(8632/10000)		Val loss :	0.4189
Top-5 val acc  :	0.994	(9936/10000)


Mean log L2 = -3.5716552734375
Total dropped = 0
param norm = 48.86460876464844

Epoch 52 in 231.75 sec
Train accuracy :	0.939	(46953/50000)		Train loss :	0.1956
Val accuracy   :	0.862	(8624/10000)		Val loss :	0.438
Top-5 val acc  :	0.994	(9937/10000)


Mean log L2 = -3.442307233810425
Total dropped = 0
param norm = 48.62758255004883

Epoch 53 in 231.86 sec
Train accuracy :	0.939	(46952/50000)		Train loss :	0.1941
Val accuracy   :	0.856	(8557/10000)		Val loss :	0.4512
Top-5 val acc  :	0.993	(9934/10000)


Mean log L2 = -3.4031341075897217
Total dropped = 0
param norm = 48.39788055419922

Epoch 54 in 231.84 sec
Train accuracy :	0.941	(47051/50000)		Train loss :	0.1878
Val accuracy   :	0.863	(8626/10000)		Val loss :	0.4244
Top-5 val acc  :	0.992	(9924/10000)


Mean log L2 = -3.532428026199341
Total dropped = 0
param norm = 48.11537170410156

Epoch 55 in 231.88 sec
Train accuracy :	0.946	(47318/50000)		Train loss :	0.1735
Val accuracy   :	0.868	(8675/10000)		Val loss :	0.4206
Top-5 val acc  :	0.994	(9943/10000)


Mean log L2 = -3.707608461380005
Total dropped = 0
param norm = 47.81212615966797

Epoch 56 in 231.41 sec
Train accuracy :	0.949	(47452/50000)		Train loss :	0.1644
Val accuracy   :	0.861	(8612/10000)		Val loss :	0.4508
Top-5 val acc  :	0.993	(9926/10000)


Mean log L2 = -3.706174612045288
Total dropped = 0
param norm = 47.531700134277344

Epoch 57 in 231.72 sec
Train accuracy :	0.952	(47589/50000)		Train loss :	0.1571
Val accuracy   :	0.87	(8704/10000)		Val loss :	0.4339
Top-5 val acc  :	0.994	(9940/10000)


Mean log L2 = -3.6842498779296875
Total dropped = 0
param norm = 47.2385368347168

Epoch 58 in 231.76 sec
Train accuracy :	0.954	(47708/50000)		Train loss :	0.1501
Val accuracy   :	0.863	(8634/10000)		Val loss :	0.4674
Top-5 val acc  :	0.993	(9933/10000)


Mean log L2 = -3.5414388179779053
Total dropped = 0
param norm = 46.9505615234375

Epoch 59 in 231.77 sec
Train accuracy :	0.956	(47809/50000)		Train loss :	0.1447
Val accuracy   :	0.868	(8678/10000)		Val loss :	0.4455
Top-5 val acc  :	0.993	(9934/10000)


Mean log L2 = -3.6750500202178955
Total dropped = 0
param norm = 46.69054412841797

Epoch 60 in 231.83 sec
Train accuracy :	0.958	(47917/50000)		Train loss :	0.1371
Val accuracy   :	0.873	(8734/10000)		Val loss :	0.4143
Top-5 val acc  :	0.995	(9951/10000)


Mean log L2 = -3.6369407176971436
Total dropped = 0
param norm = 46.4272346496582

Epoch 61 in 231.77 sec
Train accuracy :	0.96	(47989/50000)		Train loss :	0.1325
Val accuracy   :	0.873	(8733/10000)		Val loss :	0.4149
Top-5 val acc  :	0.994	(9942/10000)


Mean log L2 = -3.7714927196502686
Total dropped = 0
param norm = 46.165889739990234

Epoch 62 in 231.57 sec
Train accuracy :	0.962	(48079/50000)		Train loss :	0.1284
Val accuracy   :	0.869	(8693/10000)		Val loss :	0.4471
Top-5 val acc  :	0.993	(9931/10000)


Mean log L2 = -3.741414785385132
Total dropped = 0
param norm = 45.88650894165039

Epoch 63 in 231.85 sec
Train accuracy :	0.966	(48284/50000)		Train loss :	0.1158
Val accuracy   :	0.867	(8666/10000)		Val loss :	0.462
Top-5 val acc  :	0.993	(9925/10000)


Mean log L2 = -3.553729295730591
Total dropped = 0
param norm = 45.629150390625

Epoch 64 in 231.85 sec
Train accuracy :	0.966	(48322/50000)		Train loss :	0.1136
Val accuracy   :	0.874	(8738/10000)		Val loss :	0.4297
Top-5 val acc  :	0.994	(9940/10000)


Mean log L2 = -3.670574903488159
Total dropped = 0
param norm = 45.36148452758789

Epoch 65 in 231.89 sec
Train accuracy :	0.97	(48487/50000)		Train loss :	0.1036
Val accuracy   :	0.868	(8677/10000)		Val loss :	0.4436
Top-5 val acc  :	0.994	(9941/10000)


Mean log L2 = -3.648801565170288
Total dropped = 0
param norm = 45.105064392089844

Epoch 66 in 231.87 sec
Train accuracy :	0.972	(48580/50000)		Train loss :	0.0977
Val accuracy   :	0.875	(8754/10000)		Val loss :	0.4229
Top-5 val acc  :	0.994	(9941/10000)


Mean log L2 = -3.5775818824768066
Total dropped = 0
param norm = 44.828857421875

Epoch 67 in 231.77 sec
Train accuracy :	0.974	(48676/50000)		Train loss :	0.0925
Val accuracy   :	0.872	(8717/10000)		Val loss :	0.4477
Top-5 val acc  :	0.994	(9938/10000)


Mean log L2 = -3.6966798305511475
Total dropped = 0
param norm = 44.57392883300781

Epoch 68 in 231.96 sec
Train accuracy :	0.975	(48750/50000)		Train loss :	0.0869
Val accuracy   :	0.874	(8741/10000)		Val loss :	0.4419
Top-5 val acc  :	0.994	(9935/10000)


Mean log L2 = -3.795743703842163
Total dropped = 0
param norm = 44.32609939575195

Epoch 69 in 231.37 sec
Train accuracy :	0.977	(48871/50000)		Train loss :	0.0809
Val accuracy   :	0.882	(8822/10000)		Val loss :	0.4201
Top-5 val acc  :	0.995	(9945/10000)


Mean log L2 = -3.7914741039276123
Total dropped = 0
param norm = 44.09172058105469

Epoch 70 in 231.70 sec
Train accuracy :	0.978	(48898/50000)		Train loss :	0.0782
Val accuracy   :	0.877	(8773/10000)		Val loss :	0.4328
Top-5 val acc  :	0.995	(9945/10000)


Mean log L2 = -3.639698028564453
Total dropped = 0
param norm = 43.86382293701172

Epoch 71 in 231.88 sec
Train accuracy :	0.98	(49008/50000)		Train loss :	0.0702
Val accuracy   :	0.876	(8758/10000)		Val loss :	0.4664
Top-5 val acc  :	0.993	(9929/10000)


Mean log L2 = -3.499762773513794
Total dropped = 0
param norm = 43.63877868652344

Epoch 72 in 231.81 sec
Train accuracy :	0.982	(49092/50000)		Train loss :	0.0662
Val accuracy   :	0.876	(8760/10000)		Val loss :	0.467
Top-5 val acc  :	0.993	(9934/10000)


Mean log L2 = -3.735151767730713
Total dropped = 0
param norm = 43.43506622314453

Epoch 73 in 231.38 sec
Train accuracy :	0.984	(49180/50000)		Train loss :	0.0613
Val accuracy   :	0.883	(8830/10000)		Val loss :	0.4455
Top-5 val acc  :	0.995	(9946/10000)


Mean log L2 = -3.708660840988159
Total dropped = 0
param norm = 43.24686813354492

Epoch 74 in 231.85 sec
Train accuracy :	0.984	(49201/50000)		Train loss :	0.0594
Val accuracy   :	0.881	(8810/10000)		Val loss :	0.4579
Top-5 val acc  :	0.993	(9934/10000)


Mean log L2 = -3.686100721359253
Total dropped = 0
param norm = 43.06256866455078

Epoch 75 in 231.67 sec
Train accuracy :	0.986	(49306/50000)		Train loss :	0.0528
Val accuracy   :	0.88	(8803/10000)		Val loss :	0.4766
Top-5 val acc  :	0.994	(9938/10000)


Mean log L2 = -3.5873382091522217
Total dropped = 0
param norm = 42.89171600341797

Epoch 76 in 231.75 sec
Train accuracy :	0.986	(49303/50000)		Train loss :	0.0529
Val accuracy   :	0.883	(8835/10000)		Val loss :	0.4771
Top-5 val acc  :	0.993	(9926/10000)


Mean log L2 = -3.6519925594329834
Total dropped = 0
param norm = 42.7416877746582

Epoch 77 in 231.81 sec
Train accuracy :	0.988	(49389/50000)		Train loss :	0.0485
Val accuracy   :	0.883	(8830/10000)		Val loss :	0.4562
Top-5 val acc  :	0.994	(9940/10000)


Mean log L2 = -3.579482316970825
Total dropped = 0
param norm = 42.60558319091797

Epoch 78 in 231.85 sec
Train accuracy :	0.989	(49451/50000)		Train loss :	0.0444
Val accuracy   :	0.884	(8837/10000)		Val loss :	0.474
Top-5 val acc  :	0.994	(9943/10000)


Mean log L2 = -3.7510292530059814
Total dropped = 0
param norm = 42.481937408447266

Epoch 79 in 231.68 sec
Train accuracy :	0.989	(49471/50000)		Train loss :	0.0419
Val accuracy   :	0.887	(8871/10000)		Val loss :	0.4806
Top-5 val acc  :	0.994	(9939/10000)


Mean log L2 = -3.6081230640411377
Total dropped = 0
param norm = 42.377471923828125

Epoch 80 in 231.86 sec
Train accuracy :	0.99	(49524/50000)		Train loss :	0.0397
Val accuracy   :	0.884	(8841/10000)		Val loss :	0.4921
Top-5 val acc  :	0.994	(9942/10000)


Mean log L2 = -3.714890241622925
Total dropped = 0
param norm = 42.28580093383789

Epoch 81 in 231.97 sec
Train accuracy :	0.991	(49530/50000)		Train loss :	0.0378
Val accuracy   :	0.886	(8856/10000)		Val loss :	0.5031
Top-5 val acc  :	0.994	(9944/10000)


Mean log L2 = -3.6272377967834473
Total dropped = 0
param norm = 42.2098388671875

Epoch 82 in 231.49 sec
Train accuracy :	0.991	(49564/50000)		Train loss :	0.0358
Val accuracy   :	0.887	(8868/10000)		Val loss :	0.4997
Top-5 val acc  :	0.994	(9940/10000)


Mean log L2 = -3.7411186695098877
Total dropped = 0
param norm = 42.144840240478516

Epoch 83 in 231.59 sec
Train accuracy :	0.992	(49591/50000)		Train loss :	0.0343
Val accuracy   :	0.886	(8864/10000)		Val loss :	0.5013
Top-5 val acc  :	0.994	(9944/10000)


Mean log L2 = -3.5935466289520264
Total dropped = 0
param norm = 42.09144592285156

Epoch 84 in 231.95 sec
Train accuracy :	0.993	(49643/50000)		Train loss :	0.0307
Val accuracy   :	0.886	(8857/10000)		Val loss :	0.5036
Top-5 val acc  :	0.995	(9946/10000)


Mean log L2 = -3.9758758544921875
Total dropped = 0
param norm = 42.05095291137695

Epoch 85 in 231.66 sec
Train accuracy :	0.992	(49610/50000)		Train loss :	0.0316
Val accuracy   :	0.886	(8862/10000)		Val loss :	0.5008
Top-5 val acc  :	0.994	(9944/10000)


Mean log L2 = -3.440568685531616
Total dropped = 0
param norm = 42.021705627441406

Epoch 86 in 231.74 sec
Train accuracy :	0.993	(49635/50000)		Train loss :	0.0302
Val accuracy   :	0.888	(8878/10000)		Val loss :	0.4995
Top-5 val acc  :	0.994	(9941/10000)


Mean log L2 = -3.617060422897339
Total dropped = 0
param norm = 42.00179672241211

Epoch 87 in 231.64 sec
Train accuracy :	0.993	(49643/50000)		Train loss :	0.0292
Val accuracy   :	0.887	(8867/10000)		Val loss :	0.5094
Top-5 val acc  :	0.994	(9941/10000)


Mean log L2 = -3.5437569618225098
Total dropped = 0
param norm = 41.98823928833008

Epoch 88 in 231.58 sec
Train accuracy :	0.993	(49656/50000)		Train loss :	0.029
Val accuracy   :	0.886	(8863/10000)		Val loss :	0.5091
Top-5 val acc  :	0.994	(9938/10000)


Mean log L2 = -3.6433064937591553
Total dropped = 0
param norm = 41.98084259033203

Epoch 89 in 231.67 sec
Train accuracy :	0.993	(49670/50000)		Train loss :	0.0285
Val accuracy   :	0.886	(8865/10000)		Val loss :	0.5094
Top-5 val acc  :	0.994	(9939/10000)


Mean log L2 = -3.433276891708374
Total dropped = 0
param norm = 41.977394104003906

Epoch 90 in 231.76 sec
Train accuracy :	0.994	(49698/50000)		Train loss :	0.0271
Val accuracy   :	0.887	(8868/10000)		Val loss :	0.5098
Top-5 val acc  :	0.994	(9938/10000)
