# Supplementary material
Source: ML conference proceedings conference paper supplement (https://proceedings.neurips.cc/paper_files/paper/2022/hash/545a114e655f9d25ba0d56ea9a01fc6e-Abstract.html)
Supplement: Supplementary file 1 [file 545a114e655f9d25ba0d56ea9a01fc6e-Supplemental-Conference.zip › revised_supplemental/code/results/table2/ep_cif100/2022-05-10_12-51-45_xpvgg_cif100_soft_ep2_mholo1_beta1_wd1e-2_run3/log.txt]

python train.py simus/ep/cnn/xpvgg4_cif100.json

Input   :	 (32, 32, 3)
Layer 1 :	 (16, 16, 128)
Layer 2 :	 (8, 8, 256)
Layer 3 :	 (4, 4, 512)
Layer 4 :	 (1, 1, 512)

Mean log L2 = -5.155529975891113
Total dropped = 0
param norm = 24.662689208984375

Epoch 1 in 621.20 sec
Train accuracy :	0.038	(1925/50000)		Train loss :	4.3318
Val accuracy   :	0.082	(819/10000)		Val loss :	4.0362
Top-5 val acc  :	0.252	(2517/10000)


Mean log L2 = -4.900019645690918
Total dropped = 0
param norm = 21.605506896972656

Epoch 2 in 232.53 sec
Train accuracy :	0.091	(4569/50000)		Train loss :	3.9203
Val accuracy   :	0.124	(1240/10000)		Val loss :	3.7146
Top-5 val acc  :	0.36	(3603/10000)


Mean log L2 = -4.694046974182129
Total dropped = 0
param norm = 21.915552139282227

Epoch 3 in 232.42 sec
Train accuracy :	0.143	(7134/50000)		Train loss :	3.6074
Val accuracy   :	0.168	(1679/10000)		Val loss :	3.4758
Top-5 val acc  :	0.431	(4308/10000)


Mean log L2 = -4.515658855438232
Total dropped = 0
param norm = 23.666152954101562

Epoch 4 in 232.36 sec
Train accuracy :	0.185	(9246/50000)		Train loss :	3.3707
Val accuracy   :	0.198	(1981/10000)		Val loss :	3.2743
Top-5 val acc  :	0.485	(4850/10000)


Mean log L2 = -4.037303447723389
Total dropped = 0
param norm = 25.62087631225586

Epoch 5 in 232.34 sec
Train accuracy :	0.224	(11212/50000)		Train loss :	3.1713
Val accuracy   :	0.261	(2606/10000)		Val loss :	3.0188
Top-5 val acc  :	0.551	(5509/10000)


Mean log L2 = -4.352687835693359
Total dropped = 0
param norm = 27.764440536499023

Epoch 6 in 232.30 sec
Train accuracy :	0.258	(12913/50000)		Train loss :	2.993
Val accuracy   :	0.285	(2849/10000)		Val loss :	2.848
Top-5 val acc  :	0.59	(5904/10000)


Mean log L2 = -3.7004458904266357
Total dropped = 0
param norm = 29.671567916870117

Epoch 7 in 232.42 sec
Train accuracy :	0.287	(14371/50000)		Train loss :	2.8475
Val accuracy   :	0.281	(2811/10000)		Val loss :	2.8438
Top-5 val acc  :	0.592	(5924/10000)


Mean log L2 = -4.154185771942139
Total dropped = 0
param norm = 31.203033447265625

Epoch 8 in 232.49 sec
Train accuracy :	0.313	(15669/50000)		Train loss :	2.7232
Val accuracy   :	0.327	(3267/10000)		Val loss :	2.6603
Top-5 val acc  :	0.632	(6324/10000)


Mean log L2 = -3.7158992290496826
Total dropped = 0
param norm = 32.68782424926758

Epoch 9 in 232.24 sec
Train accuracy :	0.337	(16840/50000)		Train loss :	2.6172
Val accuracy   :	0.332	(3322/10000)		Val loss :	2.6231
Top-5 val acc  :	0.647	(6471/10000)


Mean log L2 = -3.7245070934295654
Total dropped = 0
param norm = 33.78399658203125

Epoch 10 in 232.26 sec
Train accuracy :	0.357	(17846/50000)		Train loss :	2.5268
Val accuracy   :	0.37	(3700/10000)		Val loss :	2.468
Top-5 val acc  :	0.681	(6811/10000)


Mean log L2 = -3.7684686183929443
Total dropped = 0
param norm = 34.65883255004883

Epoch 11 in 232.16 sec
Train accuracy :	0.369	(18474/50000)		Train loss :	2.463
Val accuracy   :	0.369	(3689/10000)		Val loss :	2.467
Top-5 val acc  :	0.675	(6751/10000)


Mean log L2 = -3.872060537338257
Total dropped = 0
param norm = 35.28752899169922

Epoch 12 in 232.57 sec
Train accuracy :	0.386	(19324/50000)		Train loss :	2.3898
Val accuracy   :	0.369	(3692/10000)		Val loss :	2.4306
Top-5 val acc  :	0.684	(6838/10000)


Mean log L2 = -3.87846302986145
Total dropped = 0
param norm = 36.0267219543457

Epoch 13 in 232.30 sec
Train accuracy :	0.393	(19638/50000)		Train loss :	2.3575
Val accuracy   :	0.382	(3819/10000)		Val loss :	2.3964
Top-5 val acc  :	0.693	(6934/10000)


Mean log L2 = -3.8896324634552
Total dropped = 0
param norm = 36.465206146240234

Epoch 14 in 232.29 sec
Train accuracy :	0.409	(20428/50000)		Train loss :	2.3003
Val accuracy   :	0.403	(4030/10000)		Val loss :	2.3218
Top-5 val acc  :	0.706	(7055/10000)


Mean log L2 = -3.805377960205078
Total dropped = 0
param norm = 37.05523681640625

Epoch 15 in 232.30 sec
Train accuracy :	0.414	(20680/50000)		Train loss :	2.2672
Val accuracy   :	0.419	(4194/10000)		Val loss :	2.265
Top-5 val acc  :	0.717	(7168/10000)


Mean log L2 = -3.5145974159240723
Total dropped = 0
param norm = 37.537174224853516

Epoch 16 in 232.44 sec
Train accuracy :	0.421	(21042/50000)		Train loss :	2.2398
Val accuracy   :	0.414	(4143/10000)		Val loss :	2.2662
Top-5 val acc  :	0.715	(7153/10000)


Mean log L2 = -3.8511574268341064
Total dropped = 0
param norm = 37.87310028076172

Epoch 17 in 232.24 sec
Train accuracy :	0.424	(21207/50000)		Train loss :	2.2064
Val accuracy   :	0.409	(4090/10000)		Val loss :	2.2782
Top-5 val acc  :	0.719	(7188/10000)


Mean log L2 = -3.682222366333008
Total dropped = 0
param norm = 38.10298538208008

Epoch 18 in 232.30 sec
Train accuracy :	0.436	(21805/50000)		Train loss :	2.1645
Val accuracy   :	0.422	(4216/10000)		Val loss :	2.2036
Top-5 val acc  :	0.733	(7333/10000)


Mean log L2 = -3.618175983428955
Total dropped = 0
param norm = 38.55990982055664

Epoch 19 in 232.32 sec
Train accuracy :	0.441	(22032/50000)		Train loss :	2.1513
Val accuracy   :	0.429	(4290/10000)		Val loss :	2.1695
Top-5 val acc  :	0.736	(7357/10000)


Mean log L2 = -3.884464979171753
Total dropped = 0
param norm = 38.7742805480957

Epoch 20 in 232.59 sec
Train accuracy :	0.446	(22284/50000)		Train loss :	2.1198
Val accuracy   :	0.438	(4384/10000)		Val loss :	2.1749
Top-5 val acc  :	0.738	(7377/10000)


Mean log L2 = -3.6530544757843018
Total dropped = 0
param norm = 38.81663513183594

Epoch 21 in 232.38 sec
Train accuracy :	0.454	(22721/50000)		Train loss :	2.0889
Val accuracy   :	0.452	(4522/10000)		Val loss :	2.1199
Top-5 val acc  :	0.751	(7512/10000)


Mean log L2 = -3.8455071449279785
Total dropped = 0
param norm = 39.13107681274414

Epoch 22 in 232.23 sec
Train accuracy :	0.453	(22674/50000)		Train loss :	2.0849
Val accuracy   :	0.429	(4293/10000)		Val loss :	2.2288
Top-5 val acc  :	0.726	(7257/10000)


Mean log L2 = -3.618133306503296
Total dropped = 0
param norm = 39.37030029296875

Epoch 23 in 232.30 sec
Train accuracy :	0.457	(22827/50000)		Train loss :	2.0755
Val accuracy   :	0.454	(4543/10000)		Val loss :	2.0816
Top-5 val acc  :	0.755	(7553/10000)


Mean log L2 = -3.817335605621338
Total dropped = 0
param norm = 39.4688835144043

Epoch 24 in 232.30 sec
Train accuracy :	0.463	(23147/50000)		Train loss :	2.0474
Val accuracy   :	0.451	(4512/10000)		Val loss :	2.1275
Top-5 val acc  :	0.75	(7502/10000)


Mean log L2 = -3.602830648422241
Total dropped = 0
param norm = 39.48075866699219

Epoch 25 in 232.45 sec
Train accuracy :	0.472	(23608/50000)		Train loss :	2.0104
Val accuracy   :	0.441	(4407/10000)		Val loss :	2.1336
Top-5 val acc  :	0.748	(7478/10000)


Mean log L2 = -3.1507530212402344
Total dropped = 0
param norm = 39.6514892578125

Epoch 26 in 232.28 sec
Train accuracy :	0.475	(23755/50000)		Train loss :	2.004
Val accuracy   :	0.465	(4649/10000)		Val loss :	2.0547
Top-5 val acc  :	0.757	(7568/10000)


Mean log L2 = -3.464769124984741
Total dropped = 0
param norm = 39.78345489501953

Epoch 27 in 232.20 sec
Train accuracy :	0.478	(23900/50000)		Train loss :	1.9873
Val accuracy   :	0.46	(4604/10000)		Val loss :	2.0631
Top-5 val acc  :	0.757	(7568/10000)


Mean log L2 = -3.6547486782073975
Total dropped = 0
param norm = 39.879005432128906

Epoch 28 in 232.35 sec
Train accuracy :	0.48	(23979/50000)		Train loss :	1.9745
Val accuracy   :	0.456	(4562/10000)		Val loss :	2.0618
Top-5 val acc  :	0.762	(7617/10000)


Mean log L2 = -3.928220510482788
Total dropped = 0
param norm = 40.022396087646484

Epoch 29 in 232.25 sec
Train accuracy :	0.485	(24274/50000)		Train loss :	1.9569
Val accuracy   :	0.464	(4643/10000)		Val loss :	2.048
Top-5 val acc  :	0.759	(7594/10000)


Mean log L2 = -3.6070480346679688
Total dropped = 0
param norm = 39.989017486572266

Epoch 30 in 232.27 sec
Train accuracy :	0.492	(24607/50000)		Train loss :	1.928
Val accuracy   :	0.449	(4488/10000)		Val loss :	2.0973
Top-5 val acc  :	0.753	(7531/10000)


Mean log L2 = -3.5874905586242676
Total dropped = 0
param norm = 40.06824493408203

Epoch 31 in 232.41 sec
Train accuracy :	0.496	(24779/50000)		Train loss :	1.9136
Val accuracy   :	0.468	(4676/10000)		Val loss :	2.047
Top-5 val acc  :	0.761	(7607/10000)


Mean log L2 = -3.71177077293396
Total dropped = 0
param norm = 40.112464904785156

Epoch 32 in 232.26 sec
Train accuracy :	0.5	(25003/50000)		Train loss :	1.8916
Val accuracy   :	0.471	(4709/10000)		Val loss :	2.0474
Top-5 val acc  :	0.759	(7590/10000)


Mean log L2 = -3.675546646118164
Total dropped = 0
param norm = 40.20183563232422

Epoch 33 in 232.42 sec
Train accuracy :	0.506	(25318/50000)		Train loss :	1.8725
Val accuracy   :	0.485	(4853/10000)		Val loss :	1.9673
Top-5 val acc  :	0.776	(7762/10000)


Mean log L2 = -3.5701406002044678
Total dropped = 0
param norm = 40.2590446472168

Epoch 34 in 232.20 sec
Train accuracy :	0.506	(25307/50000)		Train loss :	1.8688
Val accuracy   :	0.484	(4836/10000)		Val loss :	1.9875
Top-5 val acc  :	0.766	(7665/10000)


Mean log L2 = -3.615779161453247
Total dropped = 0
param norm = 40.2432746887207

Epoch 35 in 232.25 sec
Train accuracy :	0.512	(25604/50000)		Train loss :	1.8326
Val accuracy   :	0.492	(4918/10000)		Val loss :	1.9352
Top-5 val acc  :	0.777	(7775/10000)


Mean log L2 = -3.88938307762146
Total dropped = 0
param norm = 40.2358512878418

Epoch 36 in 232.33 sec
Train accuracy :	0.518	(25890/50000)		Train loss :	1.8248
Val accuracy   :	0.492	(4916/10000)		Val loss :	1.9522
Top-5 val acc  :	0.779	(7792/10000)


Mean log L2 = -3.6304352283477783
Total dropped = 0
param norm = 40.27565002441406

Epoch 37 in 232.57 sec
Train accuracy :	0.52	(26009/50000)		Train loss :	1.8093
Val accuracy   :	0.478	(4779/10000)		Val loss :	2.0008
Top-5 val acc  :	0.767	(7673/10000)


Mean log L2 = -3.660900831222534
Total dropped = 0
param norm = 40.246360778808594

Epoch 38 in 232.43 sec
Train accuracy :	0.524	(26208/50000)		Train loss :	1.7906
Val accuracy   :	0.492	(4919/10000)		Val loss :	1.948
Top-5 val acc  :	0.779	(7788/10000)


Mean log L2 = -3.194357395172119
Total dropped = 0
param norm = 40.2899284362793

Epoch 39 in 232.37 sec
Train accuracy :	0.527	(26344/50000)		Train loss :	1.7774
Val accuracy   :	0.5	(4996/10000)		Val loss :	1.8864
Top-5 val acc  :	0.79	(7899/10000)


Mean log L2 = -3.5706489086151123
Total dropped = 0
param norm = 40.22562789916992

Epoch 40 in 232.38 sec
Train accuracy :	0.536	(26782/50000)		Train loss :	1.75
Val accuracy   :	0.482	(4820/10000)		Val loss :	1.9563
Top-5 val acc  :	0.78	(7804/10000)


Mean log L2 = -3.5674188137054443
Total dropped = 0
param norm = 40.310359954833984

Epoch 41 in 232.54 sec
Train accuracy :	0.539	(26926/50000)		Train loss :	1.7377
Val accuracy   :	0.493	(4930/10000)		Val loss :	1.9247
Top-5 val acc  :	0.784	(7837/10000)


Mean log L2 = -3.862875461578369
Total dropped = 0
param norm = 40.26694107055664

Epoch 42 in 232.35 sec
Train accuracy :	0.542	(27122/50000)		Train loss :	1.7151
Val accuracy   :	0.495	(4950/10000)		Val loss :	1.9141
Top-5 val acc  :	0.785	(7854/10000)


Mean log L2 = -3.5147531032562256
Total dropped = 0
param norm = 40.28104019165039

Epoch 43 in 232.43 sec
Train accuracy :	0.546	(27294/50000)		Train loss :	1.701
Val accuracy   :	0.511	(5111/10000)		Val loss :	1.8612
Top-5 val acc  :	0.791	(7909/10000)


Mean log L2 = -3.6172759532928467
Total dropped = 0
param norm = 40.412010192871094

Epoch 44 in 232.46 sec
Train accuracy :	0.549	(27458/50000)		Train loss :	1.6921
Val accuracy   :	0.511	(5107/10000)		Val loss :	1.8679
Top-5 val acc  :	0.798	(7977/10000)


Mean log L2 = -3.9300148487091064
Total dropped = 0
param norm = 40.26749038696289

Epoch 45 in 232.42 sec
Train accuracy :	0.556	(27815/50000)		Train loss :	1.6644
Val accuracy   :	0.495	(4950/10000)		Val loss :	1.9419
Top-5 val acc  :	0.775	(7750/10000)


Mean log L2 = -3.851912021636963
Total dropped = 0
param norm = 40.19468307495117

Epoch 46 in 232.20 sec
Train accuracy :	0.564	(28188/50000)		Train loss :	1.6389
Val accuracy   :	0.514	(5145/10000)		Val loss :	1.8587
Top-5 val acc  :	0.788	(7883/10000)


Mean log L2 = -3.5279736518859863
Total dropped = 0
param norm = 40.22884750366211

Epoch 47 in 232.43 sec
Train accuracy :	0.564	(28213/50000)		Train loss :	1.6263
Val accuracy   :	0.496	(4956/10000)		Val loss :	1.9359
Top-5 val acc  :	0.781	(7813/10000)


Mean log L2 = -3.5609333515167236
Total dropped = 0
param norm = 40.245941162109375

Epoch 48 in 232.46 sec
Train accuracy :	0.571	(28534/50000)		Train loss :	1.6118
Val accuracy   :	0.52	(5203/10000)		Val loss :	1.7986
Top-5 val acc  :	0.807	(8066/10000)


Mean log L2 = -3.624690294265747
Total dropped = 0
param norm = 40.199859619140625

Epoch 49 in 232.28 sec
Train accuracy :	0.572	(28617/50000)		Train loss :	1.593
Val accuracy   :	0.526	(5257/10000)		Val loss :	1.8109
Top-5 val acc  :	0.802	(8023/10000)


Mean log L2 = -3.4980084896087646
Total dropped = 0
param norm = 40.167911529541016

Epoch 50 in 232.47 sec
Train accuracy :	0.581	(29067/50000)		Train loss :	1.5615
Val accuracy   :	0.506	(5063/10000)		Val loss :	1.8952
Top-5 val acc  :	0.788	(7877/10000)


Mean log L2 = -3.7775676250457764
Total dropped = 0
param norm = 40.12970733642578

Epoch 51 in 232.27 sec
Train accuracy :	0.585	(29235/50000)		Train loss :	1.5461
Val accuracy   :	0.523	(5228/10000)		Val loss :	1.8236
Top-5 val acc  :	0.799	(7993/10000)


Mean log L2 = -3.488182783126831
Total dropped = 0
param norm = 40.04949951171875

Epoch 52 in 232.34 sec
Train accuracy :	0.593	(29627/50000)		Train loss :	1.5162
Val accuracy   :	0.536	(5359/10000)		Val loss :	1.7639
Top-5 val acc  :	0.809	(8095/10000)


Mean log L2 = -3.6259167194366455
Total dropped = 0
param norm = 40.03615188598633

Epoch 53 in 232.40 sec
Train accuracy :	0.598	(29913/50000)		Train loss :	1.5014
Val accuracy   :	0.539	(5387/10000)		Val loss :	1.7486
Top-5 val acc  :	0.811	(8106/10000)


Mean log L2 = -3.5742530822753906
Total dropped = 0
param norm = 40.00013732910156

Epoch 54 in 232.34 sec
Train accuracy :	0.603	(30155/50000)		Train loss :	1.4888
Val accuracy   :	0.537	(5372/10000)		Val loss :	1.7413
Top-5 val acc  :	0.813	(8126/10000)


Mean log L2 = -3.356438398361206
Total dropped = 0
param norm = 39.91997146606445

Epoch 55 in 232.26 sec
Train accuracy :	0.608	(30389/50000)		Train loss :	1.4618
Val accuracy   :	0.541	(5407/10000)		Val loss :	1.7365
Top-5 val acc  :	0.817	(8171/10000)


Mean log L2 = -3.5157172679901123
Total dropped = 0
param norm = 39.85246658325195

Epoch 56 in 232.46 sec
Train accuracy :	0.613	(30655/50000)		Train loss :	1.4348
Val accuracy   :	0.541	(5413/10000)		Val loss :	1.736
Top-5 val acc  :	0.815	(8148/10000)


Mean log L2 = -3.495074987411499
Total dropped = 0
param norm = 39.81642532348633

Epoch 57 in 232.52 sec
Train accuracy :	0.618	(30904/50000)		Train loss :	1.4261
Val accuracy   :	0.545	(5447/10000)		Val loss :	1.7053
Top-5 val acc  :	0.815	(8148/10000)


Mean log L2 = -3.5550758838653564
Total dropped = 0
param norm = 39.72523880004883

Epoch 58 in 232.47 sec
Train accuracy :	0.624	(31204/50000)		Train loss :	1.3968
Val accuracy   :	0.56	(5602/10000)		Val loss :	1.6578
Top-5 val acc  :	0.829	(8288/10000)


Mean log L2 = -3.625115156173706
Total dropped = 0
param norm = 39.65085983276367

Epoch 59 in 232.18 sec
Train accuracy :	0.631	(31545/50000)		Train loss :	1.3713
Val accuracy   :	0.555	(5552/10000)		Val loss :	1.6609
Top-5 val acc  :	0.826	(8259/10000)


Mean log L2 = -3.5580170154571533
Total dropped = 0
param norm = 39.57359313964844

Epoch 60 in 232.36 sec
Train accuracy :	0.638	(31918/50000)		Train loss :	1.3521
Val accuracy   :	0.559	(5593/10000)		Val loss :	1.6376
Top-5 val acc  :	0.832	(8317/10000)


Mean log L2 = -3.5314674377441406
Total dropped = 0
param norm = 39.4743537902832

Epoch 61 in 232.33 sec
Train accuracy :	0.641	(32038/50000)		Train loss :	1.3274
Val accuracy   :	0.535	(5350/10000)		Val loss :	1.7727
Top-5 val acc  :	0.802	(8020/10000)


Mean log L2 = -3.6529290676116943
Total dropped = 0
param norm = 39.38729476928711

Epoch 62 in 232.21 sec
Train accuracy :	0.649	(32459/50000)		Train loss :	1.3055
Val accuracy   :	0.56	(5601/10000)		Val loss :	1.6553
Top-5 val acc  :	0.827	(8267/10000)


Mean log L2 = -3.6043660640716553
Total dropped = 0
param norm = 39.31183624267578

Epoch 63 in 232.32 sec
Train accuracy :	0.656	(32800/50000)		Train loss :	1.2809
Val accuracy   :	0.567	(5669/10000)		Val loss :	1.6497
Top-5 val acc  :	0.823	(8230/10000)


Mean log L2 = -3.3508670330047607
Total dropped = 0
param norm = 39.234310150146484

Epoch 64 in 232.33 sec
Train accuracy :	0.657	(32845/50000)		Train loss :	1.2669
Val accuracy   :	0.567	(5672/10000)		Val loss :	1.6329
Top-5 val acc  :	0.828	(8281/10000)


Mean log L2 = -3.2468278408050537
Total dropped = 0
param norm = 39.15375900268555

Epoch 65 in 232.31 sec
Train accuracy :	0.666	(33310/50000)		Train loss :	1.2419
Val accuracy   :	0.575	(5747/10000)		Val loss :	1.588
Top-5 val acc  :	0.835	(8354/10000)


Mean log L2 = -3.4436776638031006
Total dropped = 0
param norm = 39.06352233886719

Epoch 66 in 232.46 sec
Train accuracy :	0.674	(33687/50000)		Train loss :	1.2166
Val accuracy   :	0.572	(5720/10000)		Val loss :	1.6002
Top-5 val acc  :	0.832	(8323/10000)


Mean log L2 = -3.515393018722534
Total dropped = 0
param norm = 38.92586135864258

Epoch 67 in 232.31 sec
Train accuracy :	0.681	(34065/50000)		Train loss :	1.1865
Val accuracy   :	0.574	(5740/10000)		Val loss :	1.5911
Top-5 val acc  :	0.835	(8354/10000)


Mean log L2 = -3.3639488220214844
Total dropped = 0
param norm = 38.84220504760742

Epoch 68 in 232.52 sec
Train accuracy :	0.685	(34264/50000)		Train loss :	1.1676
Val accuracy   :	0.567	(5666/10000)		Val loss :	1.6237
Top-5 val acc  :	0.832	(8315/10000)


Mean log L2 = -3.3839168548583984
Total dropped = 0
param norm = 38.711212158203125

Epoch 69 in 232.34 sec
Train accuracy :	0.691	(34546/50000)		Train loss :	1.1444
Val accuracy   :	0.57	(5702/10000)		Val loss :	1.6248
Top-5 val acc  :	0.831	(8307/10000)


Mean log L2 = -3.4303550720214844
Total dropped = 0
param norm = 38.61991500854492

Epoch 70 in 232.26 sec
Train accuracy :	0.696	(34789/50000)		Train loss :	1.1268
Val accuracy   :	0.582	(5822/10000)		Val loss :	1.5781
Top-5 val acc  :	0.839	(8389/10000)


Mean log L2 = -3.504251480102539
Total dropped = 0
param norm = 38.524452209472656

Epoch 71 in 232.27 sec
Train accuracy :	0.702	(35118/50000)		Train loss :	1.1002
Val accuracy   :	0.583	(5825/10000)		Val loss :	1.5722
Top-5 val acc  :	0.84	(8404/10000)


Mean log L2 = -3.2803704738616943
Total dropped = 0
param norm = 38.420738220214844

Epoch 72 in 232.52 sec
Train accuracy :	0.71	(35517/50000)		Train loss :	1.0798
Val accuracy   :	0.586	(5860/10000)		Val loss :	1.5628
Top-5 val acc  :	0.839	(8389/10000)


Mean log L2 = -3.2406868934631348
Total dropped = 0
param norm = 38.28017807006836

Epoch 73 in 232.36 sec
Train accuracy :	0.717	(35844/50000)		Train loss :	1.0497
Val accuracy   :	0.59	(5895/10000)		Val loss :	1.5254
Top-5 val acc  :	0.848	(8478/10000)


Mean log L2 = -3.2213528156280518
Total dropped = 0
param norm = 38.16815948486328

Epoch 74 in 232.18 sec
Train accuracy :	0.722	(36086/50000)		Train loss :	1.0341
Val accuracy   :	0.585	(5849/10000)		Val loss :	1.5638
Top-5 val acc  :	0.837	(8367/10000)


Mean log L2 = -3.38177490234375
Total dropped = 0
param norm = 38.03559494018555

Epoch 75 in 232.38 sec
Train accuracy :	0.729	(36443/50000)		Train loss :	1.0093
Val accuracy   :	0.596	(5963/10000)		Val loss :	1.5026
Top-5 val acc  :	0.848	(8478/10000)


Mean log L2 = -3.398240804672241
Total dropped = 0
param norm = 37.92512130737305

Epoch 76 in 232.45 sec
Train accuracy :	0.733	(36628/50000)		Train loss :	0.9914
Val accuracy   :	0.602	(6021/10000)		Val loss :	1.4888
Top-5 val acc  :	0.853	(8525/10000)


Mean log L2 = -3.2977516651153564
Total dropped = 0
param norm = 37.82874298095703

Epoch 77 in 232.31 sec
Train accuracy :	0.738	(36876/50000)		Train loss :	0.9742
Val accuracy   :	0.599	(5986/10000)		Val loss :	1.5153
Top-5 val acc  :	0.848	(8480/10000)


Mean log L2 = -3.375869035720825
Total dropped = 0
param norm = 37.72093200683594

Epoch 78 in 232.31 sec
Train accuracy :	0.746	(37291/50000)		Train loss :	0.9462
Val accuracy   :	0.599	(5989/10000)		Val loss :	1.5008
Top-5 val acc  :	0.847	(8474/10000)


Mean log L2 = -3.1229779720306396
Total dropped = 0
param norm = 37.61592102050781

Epoch 79 in 232.45 sec
Train accuracy :	0.752	(37579/50000)		Train loss :	0.9316
Val accuracy   :	0.608	(6080/10000)		Val loss :	1.4734
Top-5 val acc  :	0.853	(8532/10000)


Mean log L2 = -3.1528425216674805
Total dropped = 0
param norm = 37.51985549926758

Epoch 80 in 232.51 sec
Train accuracy :	0.757	(37869/50000)		Train loss :	0.9098
Val accuracy   :	0.603	(6026/10000)		Val loss :	1.487
Top-5 val acc  :	0.851	(8508/10000)


Mean log L2 = -3.2724978923797607
Total dropped = 0
param norm = 37.41779327392578

Epoch 81 in 232.41 sec
Train accuracy :	0.764	(38194/50000)		Train loss :	0.8859
Val accuracy   :	0.604	(6044/10000)		Val loss :	1.4913
Top-5 val acc  :	0.851	(8506/10000)


Mean log L2 = -3.020936965942383
Total dropped = 0
param norm = 37.32902145385742

Epoch 82 in 232.27 sec
Train accuracy :	0.767	(38359/50000)		Train loss :	0.871
Val accuracy   :	0.609	(6094/10000)		Val loss :	1.4772
Top-5 val acc  :	0.851	(8511/10000)


Mean log L2 = -3.129335403442383
Total dropped = 0
param norm = 37.256229400634766

Epoch 83 in 232.33 sec
Train accuracy :	0.771	(38533/50000)		Train loss :	0.8577
Val accuracy   :	0.608	(6080/10000)		Val loss :	1.478
Top-5 val acc  :	0.853	(8534/10000)


Mean log L2 = -2.8609979152679443
Total dropped = 0
param norm = 37.19158172607422

Epoch 84 in 232.51 sec
Train accuracy :	0.776	(38791/50000)		Train loss :	0.8419
Val accuracy   :	0.612	(6117/10000)		Val loss :	1.4618
Top-5 val acc  :	0.857	(8570/10000)


Mean log L2 = -3.0677273273468018
Total dropped = 0
param norm = 37.140689849853516

Epoch 85 in 232.31 sec
Train accuracy :	0.78	(39002/50000)		Train loss :	0.8224
Val accuracy   :	0.61	(6096/10000)		Val loss :	1.4744
Top-5 val acc  :	0.855	(8552/10000)


Mean log L2 = -2.8809258937835693
Total dropped = 0
param norm = 37.099552154541016

Epoch 86 in 232.35 sec
Train accuracy :	0.783	(39168/50000)		Train loss :	0.8162
Val accuracy   :	0.615	(6150/10000)		Val loss :	1.4616
Top-5 val acc  :	0.855	(8550/10000)


Mean log L2 = -2.965224504470825
Total dropped = 0
param norm = 37.06727981567383

Epoch 87 in 232.19 sec
Train accuracy :	0.786	(39284/50000)		Train loss :	0.8028
Val accuracy   :	0.616	(6161/10000)		Val loss :	1.4526
Top-5 val acc  :	0.859	(8594/10000)


Mean log L2 = -3.044820785522461
Total dropped = 0
param norm = 37.04521179199219

Epoch 88 in 232.50 sec
Train accuracy :	0.788	(39400/50000)		Train loss :	0.7967
Val accuracy   :	0.616	(6156/10000)		Val loss :	1.4557
Top-5 val acc  :	0.856	(8558/10000)


Mean log L2 = -2.999837636947632
Total dropped = 0
param norm = 37.03352737426758

Epoch 89 in 232.53 sec
Train accuracy :	0.791	(39536/50000)		Train loss :	0.7876
Val accuracy   :	0.617	(6165/10000)		Val loss :	1.4519
Top-5 val acc  :	0.856	(8559/10000)


Mean log L2 = -3.0861356258392334
Total dropped = 0
param norm = 37.02787399291992

Epoch 90 in 232.29 sec
Train accuracy :	0.791	(39574/50000)		Train loss :	0.7847
Val accuracy   :	0.616	(6164/10000)		Val loss :	1.447
Top-5 val acc  :	0.857	(8573/10000)
