# Supplementary material
Source: ML conference proceedings conference paper supplement (https://proceedings.neurips.cc/paper_files/paper/2022/hash/545a114e655f9d25ba0d56ea9a01fc6e-Abstract.html)
Supplement: Supplementary file 1 [file 545a114e655f9d25ba0d56ea9a01fc6e-Supplemental-Conference.zip › revised_supplemental/code/utils/custom.py]

## Adapted from max_pool source code in Haiku ##

import types
from typing import Optional, Sequence, Tuple, Union
import warnings

import jax.numpy as jnp
import numpy as np
from jax import grad, jit, vmap, lax, random
from functools import partial
from jax.nn import softmax
from jax.scipy.special import logsumexp
from jax.tree_util import tree_map
import haiku as hk


def _infer_shape(
    x: jnp.ndarray,
    size: Union[int, Sequence[int]],
    channel_axis: Optional[int] = -1,
) -> Tuple[int, ...]:
    if isinstance(size, int):
        if channel_axis and not 0 <= abs(channel_axis) < x.ndim:
            raise ValueError(f"Invalid channel axis {channel_axis} for {x.shape}")
        if channel_axis and channel_axis < 0:
            channel_axis = x.ndim + channel_axis
        return (1,) + tuple(size if d != channel_axis else 1
                        for d in range(1, x.ndim))
    elif len(size) < x.ndim:
    # Assume additional dimensions are batch dimensions.
        return (1,) * (x.ndim - len(size)) + tuple(size)
    else:
        assert x.ndim == len(size)
        return tuple(size)


def sfm_pool(
    value: jnp.ndarray,
    window_shape: Union[int, Sequence[int]],
    strides: Union[int, Sequence[int]],
    padding: str,
    channel_axis: Optional[int] = -1,
    T: Optional[float] = 1.0,
) -> jnp.ndarray:

    if padding not in ("SAME", "VALID"):
        raise ValueError(f"Invalid padding '{padding}', must be 'SAME' or 'VALID'.")

    window_shape = _infer_shape(value, window_shape, channel_axis)
    strides = _infer_shape(value, strides, channel_axis)

    T = jnp.array(T).astype(value.dtype)
    tmp_v = lax.div(value, T)
    max_v = window_wise_max(tmp_v, window_shape, strides, padding)
    safe_exp = lax.exp(tmp_v - lax.stop_gradient(max_v))
    numer = lax.mul(value, safe_exp)

    reduce_window_args = (0., lax.add, window_shape, strides, padding)

    pooled_num = lax.reduce_window(numer, *reduce_window_args)
    pooled_den = lax.reduce_window(safe_exp, *reduce_window_args)

    out = lax.div(pooled_num, pooled_den)
    return out


def window_wise_max(x, ws, strides, padding):
    
    holo = (x.dtype == jnp.complex64)
    ones = jnp.ones_like(x)

    def f(o, x):
        sum_pool = lax.reduce_window(o, 0., lax.add, ws, strides, padding)
        maxpooled = hk.max_pool(x, ws, strides, padding)
        return jnp.sum(sum_pool * maxpooled)

    return grad(f, holomorphic=holo)(ones, x)


class SfmPool(hk.Module):
    def __init__(
        self,
        window_shape: Union[int, Sequence[int]],
        strides: Union[int, Sequence[int]],
        padding: str,
        channel_axis: Optional[int] = -1,
        name: Optional[str] = None,
        T: Optional[float] = 1.0,
    ):

        super().__init__(name=name)
        self.window_shape = window_shape
        self.strides = strides
        self.padding = padding
        self.channel_axis = channel_axis
        self.T = T

    def __call__(self, value: jnp.ndarray) -> jnp.ndarray:
        return sfm_pool(value, self.window_shape, self.strides,
                        self.padding, self.channel_axis, self.T)
